# Supplementary material for: Effects of HiPIMS Duty Cycle on Plasma Discharge and the Properties of Cu Film
Source: MDPI journal article supplement (doi:10.3390/ma17102311), 2024-05-13
Supplement: s1 [file s1]

# PLASUS SpecLine Database

Lower wavelength limit: 100 nm  
Upper wavelength limit: 1000 nm

Lines found:

| Line [nm] | Element | I (rel.)<br>lower - upper | Energy [eV]<br>lower - upper | Transition<br>lower - upper | Quantum number | Comment |
|-----------|---------|---------------------------|------------------------------|-----------------------------|----------------|---------|
| <hr/>     |         |                           |                              |                             |                |         |
| 165.5320  | Cu I    | 0 -                       | -                            | -                           |                |         |
| 168.8090  | Cu I    | 0 -                       | -                            | -                           |                |         |
| 169.1080  | Cu I    | 0 -                       | -                            | -                           |                |         |
| 170.3840  | Cu I    | 0 -                       | -                            | -                           |                |         |
| 171.3360  | Cu I    | 0 -                       | -                            | -                           |                |         |
| <hr/>     |         |                           |                              |                             |                |         |
| 172.5660  | Cu I    | 0 -                       | -                            | -                           |                |         |
| 174.1570  | Cu I    | 0 -                       | -                            | -                           |                |         |
| 177.4820  | Cu I    | 0 -                       | -                            | -                           |                |         |
| 182.5350  | Cu I    | 0 -                       | -                            | -                           |                |         |
| 202.4325  | Cu I    | 110 0.00 -                | 6.12 4s 2S                   | - 5p 2P                     | 1/2 - 1/2      |         |
| 202.4338  | Cu I    | 219 0.00 -                | 6.12 4s 2S                   | - 5p 2P                     | 1/2 - 3/2      |         |
| 213.8540  | Cu I    | 19 1.39 -                 | 7.18 4s2 2D                  | - 7p 2P                     | 5/2 - 3/2      |         |
| 216.5090  | Cu I    | 165 0.00 -                | 5.72 4s 2S                   | - 4p' 2D                    | 1/2 - 3/2      |         |
| 217.8940  | Cu I    | 268 0.00 -                | 5.69 4s 2S                   | - 4p' 2P                    | 1/2 - 3/2      |         |
| 218.1720  | Cu I    | 160 0.00 -                | 5.68 4s 2S                   | - 4p' 2P                    | 1/2 - 1/2      |         |
| 219.9580  | Cu I    | 75 1.39 -                 | 7.02 4s2 2D                  | - 4p" 2D                    | 5/2 - 5/2      |         |
| 219.9750  | Cu I    | 913 1.64 -                | 7.28 4s2 2D                  | - 4p" 2D                    | 3/2 - 3/2      |         |
| 221.4580  | Cu I    | 29 1.39 -                 | 6.99 4s2 2D                  | - 4p" 2P                    | 5/2 - 3/2      |         |
| 221.5650  | Cu I    | 0 -                       | -                            | -                           |                |         |
| 222.5700  | Cu I    | 72 0.00 -                 | 5.57 4s 2S                   | - 4p' 4D                    | 1/2 - 1/2      |         |
| 222.7780  | Cu I    | 85 1.64 -                 | 7.21 4s2 2D                  | - 4p" 2F                    | 3/2 - 5/2      |         |
| 223.0080  | Cu I    | 69 1.39 -                 | 6.95 4s2 2D                  | - 4p" 2F                    | 5/2 - 7/2      |         |
| 223.8450  | Cu I    | 0 -                       | -                            | -                           |                |         |
| 224.4260  | Cu I    | 7 0.00 -                  | 5.52 4s 2S                   | - 4p' 4D                    | 1/2 - 3/2      |         |
| 226.0530  | Cu I    | 0 -                       | -                            | -                           |                |         |
| 226.3080  | Cu I    | 0 -                       | -                            | -                           |                |         |
| 229.3840  | Cu I    | 29 1.39 -                 | 6.79 4s2 2D                  | - 6p 2P                     | 5/2 - 3/2      |         |
| 230.3120  | Cu I    | 0 -                       | -                            | -                           |                |         |
| 239.2630  | Cu I    | 0 -                       | -                            | -                           |                |         |
| 240.6660  | Cu I    | 0 -                       | -                            | -                           |                |         |
| 244.1640  | Cu I    | 4 0.00 -                  | 5.08 4s 2S                   | - 4p' 4P                    | 1/2 - 1/2      |         |
| 249.2150  | Cu I    | 12 0.00 -                 | 4.97 4s 2S                   | - 4p' 4P                    | 1/2 - 3/2      |         |
| 261.8370  | Cu I    | 127 1.39 -                | 6.12 4s2 2D                  | - 5p 2P                     | 5/2 - 3/2      |         |

|               |     |        |             |   |        |       |     |
|---------------|-----|--------|-------------|---|--------|-------|-----|
| 262.6690 Cu I | 80  | 5.08 - | 9.80 4p' 4P | - | 5d' 4D | 1/2 - | 3/2 |
| 262.9968 Cu I | 90  | 4.84 - | 9.55 4p' 4P | - | 5d' 4P | 5/2 - | 5/2 |
| 263.4931 Cu I | 98  | 4.84 - | 9.54 4p' 4P | - | 5d' 4S | 5/2 - | 3/2 |
| 264.5309 Cu I | 34  | 4.97 - | 9.66 4p' 4P | - | 5d' 4D | 3/2 - | 5/2 |
| 264.9839 Cu I | 49  | 4.97 - | 9.65 4p' 4P | - | 5d' 4P | 3/2 - | 3/2 |
| 276.6370 Cu I | 45  | 1.64 - | 6.12 4s2 2D | - | 5p 2P  | 3/2 - | 3/2 |
| 282.4370 Cu I | 57  | 1.39 - | 5.78 4s2 2D | - | 4p' 2D | 5/2 - | 5/2 |
| 284.6492 Cu I | 11  | 5.08 - | 9.43 4p' 4P | - | 6s' 4D | 1/2 - | 1/2 |
| 285.8223 Cu I | 67  | 4.84 - | 9.17 4p' 4P | - | 6s' 4D | 5/2 - | 7/2 |
| 285.8731 Cu I | 1   | 1.39 - | 5.72 4s2 2D | - | 4p' 2D | 5/2 - | 3/2 |
| 288.2931 Cu I | 9   | 1.39 - | 5.69 4s2 2D | - | 4p' 2P | 5/2 - | 3/2 |
| 289.0827 Cu I | 88  | 5.51 - | 9.79 4p' 4D | - | 5d' 4G | 5/2 - | 7/2 |
| 289.1637 Cu I | 78  | 5.52 - | 9.81 4p' 4D | - | 5d' 4F | 3/2 - | 5/2 |
| 293.1704 Cu I | 7   | 5.08 - | 9.30 4p' 4P | - | 6s' 4D | 1/2 - | 3/2 |
| 293.3062 Cu I | 13  | 4.84 - | 9.06 4p' 4P | - | 4d' 4G | 5/2 - | 7/2 |
| 296.1160 Cu I | 40  | 1.39 - | 5.57 4s2 2D | - | 4p' 2F | 5/2 - | 7/2 |
| 297.8287 Cu I | 121 | 5.40 - | 9.56 4p' 4D | - | 5d' 4F | 7/2 - | 9/2 |
| 297.9379 Cu I | 103 | 5.40 - | 9.56 4p' 4D | - | 5d' 4D | 7/2 - | 7/2 |
| 299.7360 Cu I | 10  | 1.64 - | 5.78 4s2 2D | - | 4p' 2D | 3/2 - | 5/2 |
| 299.8383 Cu I | 1   | 1.39 - | 5.52 4s2 2D | - | 4p' 4D | 5/2 - | 3/2 |
| 301.0840 Cu I | 11  | 1.39 - | 5.51 4s2 2D | - | 4p' 4D | 5/2 - | 5/2 |
| 301.2016 Cu I | 78  | 4.97 - | 9.09 4p' 4P | - | 4d' 4F | 3/2 - | 5/2 |
| 301.4851 Cu I | 33  | 5.10 - | 9.21 4p' 4F | - | 6s' 4D | 7/2 - | 5/2 |
| 302.1545 Cu I | 108 | 5.07 - | 9.17 4p' 4F | - | 6s' 4D | 9/2 - | 7/2 |
| 302.2603 Cu I | 70  | 4.84 - | 8.94 4p' 4P | - | 4d' 4F | 5/2 - | 7/2 |
| 303.0257 Cu I | 21  | 4.97 - | 9.06 4p' 4P | - | 4d' 4D | 3/2 - | 3/2 |
| 303.6100 Cu I | 14  | 1.64 - | 5.72 4s2 2D | - | 4p' 2D | 3/2 - | 3/2 |
| 304.4022 Cu I | 22  | 5.10 - | 9.17 4p' 4F | - | 6s' 4D | 7/2 - | 7/2 |
| 305.2546 Cu I | 11  | 5.15 - | 9.21 4p' 4F | - | 6s' 4D | 5/2 - | 5/2 |
| 306.3410 Cu I | 9   | 1.64 - | 5.69 4s2 2D | - | 4p' 2P | 3/2 - | 3/2 |
| 306.8892 Cu I | 0   | 1.64 - | 5.68 4s2 2D | - | 4p' 2P | 3/2 - | 1/2 |
| 307.3800 Cu I | 2   | 1.39 - | 5.42 4s2 2D | - | 4p' 2F | 5/2 - | 5/2 |
| 308.8123 Cu I | 75  | 5.08 - | 9.09 4p' 4P | - | 4d' 4F | 1/2 - | 3/2 |
| 309.3990 Cu I | 4   | 1.39 - | 5.40 4s2 2D | - | 4p' 4D | 5/2 - | 7/2 |
| 309.9930 Cu I | 296 | 4.84 - | 8.84 4p' 4P | - | 4d' 4D | 5/2 - | 7/2 |
| 310.8600 Cu I | 0   | -      | -           | - | -      | -     | -   |
| 311.3473 Cu I | 27  | 4.84 - | 8.82 4p' 4P | - | 4d' 2F | 5/2 - | 7/2 |
| 312.0437 Cu I | 34  | 4.97 - | 8.95 4p' 4P | - | 4d' 2P | 3/2 - | 1/2 |
| 312.6110 Cu I | 447 | 4.84 - | 8.80 4p' 4P | - | 4d' 4S | 5/2 - | 3/2 |
| 312.8692 Cu I | 195 | 4.97 - | 8.94 4p' 4P | - | 4d' 4D | 3/2 - | 5/2 |
| 314.0313 Cu I | 103 | 4.84 - | 8.78 4p' 4P | - | 4d' 2P | 5/2 - | 3/2 |
| 314.2436 Cu I | 270 | 4.97 - | 8.92 4p' 4P | - | 4d' 4P | 3/2 - | 3/2 |

|              |      |        |             |   |        |       |      |
|--------------|------|--------|-------------|---|--------|-------|------|
| 314.6814Cu I | 148  | 4.97 - | 8.91 4p' 4P | - | 4d' 4P | 3/2 - | 1/2  |
| 314.8341Cu I | 11   | 5.15 - | 9.09 4p' 4F | - | 4d' 4F | 5/2 - | 3/2  |
| 314.9510Cu I | 25   | 5.15 - | 9.09 4p' 4F | - | 4d' 4F | 5/2 - | 5/2  |
| 315.6630Cu I | 1    | 1.64 - | 5.57 4s2 2D | - | 4p' 4D | 3/2 - | 1/2  |
| 316.0059Cu I | 26   | 5.15 - | 9.08 4p' 4F | - | 4d' 4G | 5/2 - | 5/2  |
| 316.9675Cu I | 205  | 5.15 - | 9.06 4p' 4F | - | 4d' 4G | 5/2 - | 7/2  |
| 317.1649Cu I | 22   | 5.52 - | 9.43 4p' 4D | - | 6s' 4D | 3/2 - | 1/2  |
| 319.4100Cu I | 10   | 1.64 - | 5.52 4s2 2D | - | 4p' 4D | 3/2 - | 3/2  |
| 320.8230Cu I | 5    | 1.64 - | 5.51 4s2 2D | - | 4p' 4D | 3/2 - | 5/2  |
| 322.3420Cu I | 129  | 5.24 - | 9.09 4p' 4F | - | 4d' 4F | 3/2 - | 3/2  |
| 322.4646Cu I | 159  | 5.24 - | 9.09 4p' 4F | - | 4d' 4F | 3/2 - | 5/2  |
| 323.1166Cu I | 235  | 5.10 - | 8.94 4p' 4F | - | 4d' 4F | 7/2 - | 7/2  |
| 323.3895Cu I | 78   | 5.10 - | 8.94 4p' 4F | - | 4d' 4D | 7/2 - | 5/2  |
| 323.5706Cu I | 417  | 5.24 - | 9.08 4p' 4F | - | 4d' 4G | 3/2 - | 5/2  |
| 324.3160Cu I | 708  | 5.10 - | 8.92 4p' 4F | - | 4d' 4G | 7/2 - | 9/2  |
| 324.7540Cu I | 867  | 0.00 - | 3.82 4s 2S  | - | 4p 2P  | 1/2 - | 3/2  |
| 326.8283Cu I | 214  | 5.15 - | 8.95 4p' 4F | - | 4d' 2F | 5/2 - | 5/2  |
| 327.3960Cu I | 438  | 0.00 - | 3.79 4s 2S  | - | 4p 2P  | 1/2 - | 1/2  |
| 327.9812Cu I | 7    | 1.64 - | 5.42 4s2 2D | - | 4p' 2F | 3/2 - | 5/2  |
| 328.2720Cu I | 538  | 5.15 - | 8.93 4p' 4F | - | 4d' 2G | 5/2 - | 7/2  |
| 328.5079Cu I | 16   | 3.82 - | 7.59 4p 2P  | - | 11d 2D | 3/2 - | 5/2  |
| 328.6189Cu I | 13   | 3.79 - | 7.56 4p 2P  | - | 10d 2D | 1/2 - | 3/2  |
| 329.0540Cu I | 646  | 5.07 - | 8.84 4p' 4F | - | 4d' 4F | 9/2 - | 9/2  |
| 329.2390Cu I | 57   | 5.15 - | 8.92 4p' 4F | - | 4d' 4P | 5/2 - | 3/2  |
| 329.2823Cu I | 1    | 1.39 - | 5.15 4s2 2D | - | 4p' 4F | 5/2 - | 5/2  |
| 330.7950Cu I | 4366 | 5.07 - | 8.82 4p' 4F | - | 4d' 4G | 9/2 - | 11/2 |
| 331.3195Cu I | 23   | 3.82 - | 7.56 4p 2P  | - | 10d 2D | 3/2 - | 5/2  |
| 331.3242Cu I | 3    | 3.82 - | 7.56 4p 2P  | - | 10d 2D | 3/2 - | 3/2  |
| 331.7214Cu I | 324  | 5.10 - | 8.84 4p' 4F | - | 4d' 4F | 7/2 - | 9/2  |
| 331.9674Cu I | 219  | 5.10 - | 8.84 4p' 4F | - | 4d' 4D | 7/2 - | 7/2  |
| 332.5808Cu I | 19   | 3.79 - | 7.51 4p 2P  | - | 9d 2D  | 1/2 - | 3/2  |
| 332.9627Cu I | 92   | 5.10 - | 8.83 4p' 4F | - | 4d' 4P | 7/2 - | 5/2  |
| 333.5223Cu I | 94   | 5.10 - | 8.82 4p' 4F | - | 4d' 2F | 7/2 - | 7/2  |
| 333.7840Cu I | 6    | 1.39 - | 5.10 4s2 2D | - | 4p' 4F | 5/2 - | 7/2  |
| 334.9266Cu I | 240  | 5.24 - | 8.95 4p' 4F | - | 4d' 2F | 3/2 - | 5/2  |
| 335.3462Cu I | 33   | 3.82 - | 7.51 4p 2P  | - | 9d 2D  | 3/2 - | 5/2  |
| 335.3520Cu I | 4    | 3.82 - | 7.51 4p 2P  | - | 9d 2D  | 3/2 - | 3/2  |
| 335.4478Cu I | 110  | 5.24 - | 8.94 4p' 4F | - | 4d' 2D | 3/2 - | 3/2  |
| 336.5345Cu I | 282  | 5.10 - | 8.79 4p' 4F | - | 4d' 2G | 7/2 - | 9/2  |
| 337.5664Cu I | 34   | 5.15 - | 8.83 4p' 4F | - | 4d' 4P | 5/2 - | 5/2  |
| 338.1416Cu I | 182  | 5.15 - | 8.82 4p' 4F | - | 4d' 2F | 5/2 - | 7/2  |

|              |      |        |             |   |        |       |     |
|--------------|------|--------|-------------|---|--------|-------|-----|
| 338.4810Cu I | 34   | 5.15 - | 8.82 4p' 4F | - | 4d' 2D | 5/2 - | 5/2 |
| 338.5391Cu I | 29   | 3.79 - | 7.45 4p 2P  | - | 8d 2D  | 1/2 - | 3/2 |
| 339.2017Cu I | 14   | 5.42 - | 9.08 4p' 2F | - | 4d' 4G | 5/2 - | 5/2 |
| 339.6315Cu I | 14   | 5.15 - | 8.80 4p' 4F | - | 4d' 4S | 5/2 - | 3/2 |
| 341.3335Cu I | 121  | 5.68 - | 9.31 4p' 2P | - | 4d" 2P | 1/2 - | 1/2 |
| 341.4013Cu I | 52   | 3.82 - | 7.45 4p 2P  | - | 8d 2D  | 3/2 - | 5/2 |
| 341.4108Cu I | 6    | 3.82 - | 7.45 4p 2P  | - | 8d 2D  | 3/2 - | 3/2 |
| 342.0144Cu I | 34   | 5.69 - | 9.31 4p' 2P | - | 4d" 2P | 3/2 - | 1/2 |
| 343.3957Cu I | 1    | 3.79 - | 7.40 4p 2P  | - | 9s 2S  | 1/2 - | 1/2 |
| 343.6550Cu I | 39   | 5.72 - | 9.33 4p' 2D | - | 4d" 2P | 3/2 - | 3/2 |
| 344.0520Cu I | 1    | 1.64 - | 5.24 4s2 2D | - | 4p' 4F | 3/2 - | 3/2 |
| 345.7850Cu I | 1    | 1.39 - | 4.97 4s2 2D | - | 4p' 4P | 5/2 - | 3/2 |
| 345.9408Cu I | 35   | 5.51 - | 9.09 4p' 4D | - | 4d' 4F | 5/2 - | 5/2 |
| 346.3508Cu I | 2    | 3.82 - | 7.40 4p 2P  | - | 9s 2S  | 3/2 - | 1/2 |
| 347.2139Cu I | 90   | 5.51 - | 9.08 4p' 4D | - | 4d' 4G | 5/2 - | 5/2 |
| 347.4569Cu I | 14   | 5.52 - | 9.09 4p' 4D | - | 4d' 4F | 3/2 - | 3/2 |
| 347.5994Cu I | 381  | 5.52 - | 9.09 4p' 4D | - | 4d' 4F | 3/2 - | 5/2 |
| 348.1606Cu I | 18   | 3.79 - | 7.35 4p 2P  | - | 7d 2D  | 1/2 - | 3/2 |
| 348.3760Cu I | 538  | 5.51 - | 9.06 4p' 4D | - | 4d' 4G | 5/2 - | 7/2 |
| 348.7563Cu I | 62   | 5.78 - | 9.33 4p' 2D | - | 4d" 2P | 5/2 - | 3/2 |
| 348.8848Cu I | 59   | 5.52 - | 9.08 4p' 4D | - | 4d' 4G | 3/2 - | 5/2 |
| 349.8056Cu I | 58   | 5.40 - | 8.94 4p' 4D | - | 4d' 4F | 7/2 - | 7/2 |
| 350.0310Cu I | 53   | 5.52 - | 9.06 4p' 4D | - | 4d' 4D | 3/2 - | 3/2 |
| 350.7423Cu I | 22   | 5.40 - | 8.93 4p' 4D | - | 4d' 2G | 7/2 - | 7/2 |
| 351.1831Cu I | 88   | 3.82 - | 7.35 4p 2P  | - | 7d 2D  | 3/2 - | 5/2 |
| 351.1986Cu I | 10   | 3.82 - | 7.35 4p 2P  | - | 7d 2D  | 3/2 - | 3/2 |
| 351.2112Cu I | 332  | 5.40 - | 8.92 4p' 4D | - | 4d' 4G | 7/2 - | 9/2 |
| 351.7025Cu I | 46   | 5.42 - | 8.95 4p' 2F | - | 4d' 2F | 5/2 - | 5/2 |
| 352.0015Cu I | 289  | 5.57 - | 9.09 4p' 4D | - | 4d' 4F | 1/2 - | 3/2 |
| 352.4230Cu I | 490  | 5.42 - | 8.94 4p' 2F | - | 4d' 4F | 5/2 - | 7/2 |
| 352.7476Cu I | 209  | 5.42 - | 8.94 4p' 2F | - | 4d' 4D | 5/2 - | 5/2 |
| 353.0380Cu I | 3    | 1.64 - | 5.15 4s2 2D | - | 4p' 4F | 3/2 - | 5/2 |
| 353.3737Cu I | 240  | 5.42 - | 8.93 4p' 2F | - | 4d' 2G | 5/2 - | 7/2 |
| 354.4957Cu I | 76   | 5.42 - | 8.92 4p' 2F | - | 4d' 4P | 5/2 - | 3/2 |
| 354.6436Cu I | 30   | 5.57 - | 9.06 4p' 4D | - | 4d' 4D | 1/2 - | 3/2 |
| 356.6127Cu I | 4    | 3.79 - | 7.26 4p 2P  | - | 8s 2S  | 1/2 - | 1/2 |
| 359.4016Cu I | 1    | 1.39 - | 4.84 4s2 2D | - | 4p' 4P | 5/2 - | 5/2 |
| 359.8007Cu I | 7    | 3.82 - | 7.26 4p 2P  | - | 8s 2S  | 3/2 - | 1/2 |
| 359.9130Cu I | 2512 | 5.40 - | 8.84 4p' 4D | - | 4d' 4F | 7/2 - | 9/2 |
| 360.2030Cu I | 2512 | 5.40 - | 8.84 4p' 4D | - | 4d' 4D | 7/2 - | 7/2 |
| 360.9299Cu I | 1    | 1.64 - | 5.08 4s2 2D | - | 4p' 4P | 3/2 - | 1/2 |
| 361.0798Cu I | 92   | 5.51 - | 8.94 4p' 4D | - | 4d' 4F | 5/2 - | 7/2 |

|               |     |        |             |   |        |       |     |
|---------------|-----|--------|-------------|---|--------|-------|-----|
| 361.3744 Cu I | 240 | 5.40 - | 8.83 4p' 4D | - | 4d' 4P | 7/2 - | 5/2 |
| 361.4206 Cu I | 100 | 5.51 - | 8.94 4p' 4D | - | 4d' 4D | 5/2 - | 5/2 |
| 362.0337 Cu I | 80  | 5.40 - | 8.82 4p' 4D | - | 4d' 2F | 7/2 - | 7/2 |
| 362.1233 Cu I | 240 | 5.52 - | 8.95 4p' 4D | - | 4d' 2F | 3/2 - | 5/2 |
| 362.4228 Cu I | 76  | 5.40 - | 8.82 4p' 4D | - | 4d' 2D | 7/2 - | 5/2 |
| 362.7328 Cu I | 209 | 5.52 - | 8.94 4p' 4D | - | 4d' 2D | 3/2 - | 3/2 |
| 362.9781 Cu I | 17  | 5.42 - | 8.84 4p' 2F | - | 4d' 4D | 5/2 - | 7/2 |
| 363.2560 Cu I | 59  | 5.51 - | 8.92 4p' 4D | - | 4d' 4P | 5/2 - | 3/2 |
| 363.5928 Cu I | 166 | 5.68 - | 9.09 4p' 2P | - | 4d' 4F | 1/2 - | 3/2 |
| 364.1684 Cu I | 55  | 5.42 - | 8.83 4p' 2F | - | 4d' 4P | 5/2 - | 5/2 |
| 364.5221 Cu I | 108 | 5.69 - | 9.09 4p' 2P | - | 4d' 4F | 3/2 - | 5/2 |
| 364.8380 Cu I | 45  | 5.42 - | 8.82 4p' 2F | - | 4d' 2F | 5/2 - | 7/2 |
| 365.0851 Cu I | 22  | 5.52 - | 8.92 4p' 4D | - | 4d' 4P | 3/2 - | 3/2 |
| 365.2330 Cu I | 264 | 5.42 - | 8.82 4p' 2F | - | 4d' 2D | 5/2 - | 5/2 |
| 365.4230 Cu I | 96  | 3.79 - | 7.18 4p 2P  | - | 6d 2D  | 1/2 - | 3/2 |
| 365.5856 Cu I | 142 | 5.40 - | 8.79 4p' 4D | - | 4d' 2G | 7/2 - | 9/2 |
| 365.6762 Cu I | 67  | 5.52 - | 8.91 4p' 4D | - | 4d' 4P | 3/2 - | 1/2 |
| 365.9360 Cu I | 86  | 5.69 - | 9.08 4p' 2P | - | 4d' 4G | 3/2 - | 5/2 |
| 366.5730 Cu I | 43  | 5.42 - | 8.80 4p' 2F | - | 4d' 4S | 5/2 - | 3/2 |
| 367.1972 Cu I | 75  | 5.69 - | 9.06 4p' 2P | - | 4d' 4D | 3/2 - | 3/2 |
| 368.7434 Cu I | 127 | 3.82 - | 7.18 4p 2P  | - | 6d 2D  | 3/2 - | 5/2 |
| 368.7712 Cu I | 20  | 3.82 - | 7.18 4p 2P  | - | 6d 2D  | 3/2 - | 3/2 |
| 369.5322 Cu I | 23  | 5.57 - | 8.93 4p' 2F | - | 4d' 2G | 7/2 - | 7/2 |
| 369.9106 Cu I | 23  | 5.72 - | 9.08 4p' 2D | - | 4d' 4G | 3/2 - | 5/2 |
| 370.0529 Cu I | 121 | 5.57 - | 8.92 4p' 2F | - | 4d' 4G | 7/2 - | 9/2 |
| 371.1994 Cu I | 58  | 5.72 - | 9.06 4p' 2D | - | 4d' 4D | 3/2 - | 3/2 |
| 372.0763 Cu I | 0   | 1.64 - | 4.97 4s2 2D | - | 4p' 4P | 3/2 - | 3/2 |
| 372.1680 Cu I | 19  | 5.51 - | 8.84 4p' 4D | - | 4d' 4D | 5/2 - | 7/2 |
| 373.4195 Cu I | 76  | 5.51 - | 8.83 4p' 4D | - | 4d' 4P | 5/2 - | 5/2 |
| 374.1235 Cu I | 126 | 5.51 - | 8.82 4p' 4D | - | 4d' 2F | 5/2 - | 7/2 |
| 374.5390 Cu I | 78  | 5.51 - | 8.82 4p' 4D | - | 4d' 2D | 5/2 - | 5/2 |
| 375.9482 Cu I | 42  | 5.51 - | 8.80 4p' 4D | - | 4d' 4S | 5/2 - | 3/2 |
| 376.4839 Cu I | 18  | 5.52 - | 8.82 4p' 4D | - | 4d' 2D | 3/2 - | 5/2 |
| 377.1887 Cu I | 96  | 5.78 - | 9.06 4p' 2D | - | 4d' 4G | 5/2 - | 7/2 |
| 378.0056 Cu I | 13  | 5.51 - | 8.78 4p' 4D | - | 4d' 2P | 5/2 - | 3/2 |
| 379.7258 Cu I | 16  | 5.57 - | 8.84 4p' 2F | - | 4d' 4F | 7/2 - | 9/2 |
| 379.9867 Cu I | 27  | 5.52 - | 8.78 4p' 4D | - | 4d' 2P | 3/2 - | 3/2 |
| 380.0481 Cu I | 45  | 5.57 - | 8.84 4p' 2F | - | 4d' 4D | 7/2 - | 7/2 |
| 380.5227 Cu I | 78  | 5.69 - | 8.95 4p' 2P | - | 4d' 2P | 3/2 - | 1/2 |
| 381.2002 Cu I | 41  | 5.69 - | 8.94 4p' 2P | - | 4d' 2D | 3/2 - | 3/2 |
| 381.3532 Cu I | 22  | 5.57 - | 8.83 4p' 2F | - | 4d' 4P | 7/2 - | 5/2 |
| 381.7509 Cu I | 12  | 5.69 - | 8.94 4p' 2P | - | 4d' 4D | 3/2 - | 5/2 |

|               |     |        |             |   |         |       |     |
|---------------|-----|--------|-------------|---|---------|-------|-----|
| 382.0875 Cu I | 54  | 5.57 - | 8.82 4p' 2F | - | 4d' 2F  | 7/2 - | 7/2 |
| 382.5042 Cu I | 13  | 3.79 - | 7.03 4p 2P  | - | 7s 2S   | 1/2 - | 1/2 |
| 383.7991 Cu I | 12  | 5.69 - | 8.92 4p' 2P | - | 4d' 4P  | 3/2 - | 3/2 |
| 386.0460 Cu I | 230 | 5.57 - | 8.79 4p' 2F | - | 4d' 2G  | 7/2 - | 9/2 |
| 386.1743 Cu I | 14  | 3.82 - | 7.03 4p 2P  | - | 7s 2S   | 3/2 - | 1/2 |
| 388.1735 Cu I | 18  | 5.72 - | 8.92 4p' 2D | - | 4d' 4P  | 3/2 - | 3/2 |
| 388.8417 Cu I | 14  | 5.72 - | 8.91 4p' 2D | - | 4d' 4P  | 3/2 - | 1/2 |
| 392.1267 Cu I | 39  | 5.78 - | 8.94 4p' 2D | - | 4d' 4F  | 5/2 - | 7/2 |
| 392.5287 Cu I | 47  | 5.78 - | 8.94 4p' 2D | - | 4d' 4D  | 5/2 - | 5/2 |
| 393.3041 Cu I | 23  | 5.78 - | 8.93 4p' 2D | - | 4d' 2G  | 5/2 - | 7/2 |
| 394.6945 Cu I | 15  | 5.78 - | 8.92 4p' 2D | - | 4d' 4P  | 5/2 - | 3/2 |
| 395.1626 Cu I | 6   | 5.69 - | 8.83 4p' 2P | - | 4d' 4P  | 3/2 - | 5/2 |
| 396.4165 Cu I | 20  | 5.69 - | 8.82 4p' 2P | - | 4d' 2D  | 3/2 - | 5/2 |
| 397.5633 Cu I | 12  | 4.97 - | 8.09 4p' 4P | - | 5s' 2D  | 3/2 - | 3/2 |
| 397.9955 Cu I | 8   | 5.69 - | 8.80 4p' 2P | - | 4d' 4S  | 3/2 - | 3/2 |
| 399.3695 Cu I | 4   | 5.68 - | 8.78 4p' 2P | - | 4d' 2P  | 1/2 - | 3/2 |
| 399.8014 Cu I | 8   | 5.72 - | 8.83 4p' 2D | - | 4d' 4P  | 3/2 - | 5/2 |
| 400.3020 Cu I | 37  | 5.69 - | 8.78 4p' 2P | - | 4d' 2P  | 3/2 - | 3/2 |
| 401.0849 Cu I | 12  | 5.72 - | 8.82 4p' 2D | - | 4d' 2D  | 3/2 - | 5/2 |
| 401.5817 Cu I | 3   | 3.79 - | 6.87 4p 2P  | - | 4f 2F   | 1/2 - | 5/2 |
| 402.2630 Cu I | 140 | 3.79 - | 6.87 4p 2P  | - | 5d 2D   | 1/2 - | 3/2 |
| 402.7014 Cu I | 39  | 5.72 - | 8.80 4p' 2D | - | 4d' 4S  | 3/2 - | 3/2 |
| 405.0629 Cu I | 31  | 5.72 - | 8.78 4p' 2D | - | 4d' 2P  | 3/2 - | 3/2 |
| 405.2383 Cu I | 17  | 5.78 - | 8.84 4p' 2D | - | 4d' 4D  | 5/2 - | 7/2 |
| 406.2640 Cu I | 312 | 3.82 - | 6.87 4p 2P  | - | 5d 2D   | 3/2 - | 5/2 |
| 406.3235 Cu I | 48  | 3.82 - | 6.87 4p 2P  | - | 5d 2D   | 3/2 - | 3/2 |
| 406.9531 Cu I | 3   | 4.84 - | 7.88 4p' 4P | - | 5s' 4D  | 5/2 - | 3/2 |
| 407.3197 Cu I | 17  | 4.97 - | 8.02 4p' 4P | - | 5s' 2D  | 3/2 - | 5/2 |
| 407.5578 Cu I | 105 | 5.78 - | 8.82 4p' 2D | - | 4d' 2F  | 5/2 - | 7/2 |
| 408.0509 Cu I | 76  | 5.78 - | 8.82 4p' 2D | - | 4d' 2D  | 5/2 - | 5/2 |
| 410.4217 Cu I | 16  | 4.97 - | 7.99 4p' 4P | - | 5s' 4D  | 3/2 - | 1/2 |
| 411.1296 Cu I | 13  | 5.08 - | 8.09 4p' 4P | - | 5s' 2D  | 1/2 - | 3/2 |
| 412.1690 Cu I | 29  | 5.78 - | 8.78 4p' 2D | - | 4d' 2P  | 5/2 - | 3/2 |
| 412.3271 Cu I | 48  | 5.42 - | 8.43 4p' 2F | - | 5s'' 2D | 5/2 - | 3/2 |
| 417.7740 Cu I | 25  | 4.84 - | 7.80 4p' 4P | - | 5s' 4D  | 5/2 - | 5/2 |
| 423.0941 Cu I | 27  | 5.40 - | 8.32 4p' 4D | - | 5s'' 2D | 7/2 - | 5/2 |
| 424.2266 Cu I | 36  | 5.51 - | 8.43 4p' 4D | - | 5s'' 2D | 5/2 - | 3/2 |
| 424.9000 Cu I | 108 | 5.08 - | 7.99 4p' 4P | - | 5s' 4D  | 1/2 - | 1/2 |
| 425.9454 Cu I | 117 | 4.97 - | 7.88 4p' 4P | - | 5s' 4D  | 3/2 - | 3/2 |
| 427.5110 Cu I | 697 | 4.84 - | 7.74 4p' 4P | - | 5s' 4D  | 5/2 - | 7/2 |
| 432.8742 Cu I | 11  | 5.15 - | 8.02 4p' 4F | - | 5s' 2D  | 5/2 - | 5/2 |

|               |      |        |             |   |         |       |     |
|---------------|------|--------|-------------|---|---------|-------|-----|
| 433.5984 Cu I | 17   | 5.57 - | 8.43 4p' 4D | - | 5s'' 2D | 1/2 - | 3/2 |
| 435.4626 Cu I | 18   | 5.24 - | 8.09 4p' 4F | - | 5s' 2D  | 3/2 - | 3/2 |
| 437.8146 Cu I | 228  | 4.97 - | 7.80 4p' 4P | - | 5s' 4D  | 3/2 - | 5/2 |
| 441.5557 Cu I | 73   | 5.08 - | 7.88 4p' 4P | - | 5s' 4D  | 1/2 - | 3/2 |
| 448.0400 Cu I | 19   | 3.79 - | 6.55 4p 2P  | - | 6s 2S   | 1/2 - | 1/2 |
| 450.7408 Cu I | 458  | 5.57 - | 8.32 4p' 2F | - | 5s'' 2D | 7/2 - | 5/2 |
| 450.9400 Cu I | 181  | 5.24 - | 7.99 4p' 4F | - | 5s' 4D  | 3/2 - | 1/2 |
| 452.5127 Cu I | 57   | 5.69 - | 8.43 4p' 2P | - | 5s'' 2D | 3/2 - | 3/2 |
| 453.0800 Cu I | 57   | 3.82 - | 6.55 4p 2P  | - | 6s 2S   | 3/2 - | 1/2 |
| 453.9700 Cu I | 316  | 5.15 - | 7.88 4p' 4F | - | 5s' 4D  | 5/2 - | 3/2 |
| 458.7000 Cu I | 487  | 5.10 - | 7.80 4p' 4F | - | 5s' 4D  | 7/2 - | 5/2 |
| 464.2538 Cu I | 96   | 5.42 - | 8.09 4p' 2F | - | 5s' 2D  | 5/2 - | 3/2 |
| 465.1120 Cu I | 1089 | 5.07 - | 7.74 4p' 4F | - | 5s' 4D  | 9/2 - | 7/2 |
| 467.4780 Cu I | 154  | 5.15 - | 7.80 4p' 4F | - | 5s' 4D  | 5/2 - | 5/2 |
| 469.7470 Cu I | 71   | 5.24 - | 7.88 4p' 4F | - | 5s' 4D  | 3/2 - | 3/2 |
| 470.4600 Cu I | 166  | 5.10 - | 7.74 4p' 4F | - | 5s' 4D  | 7/2 - | 7/2 |
| 476.7416 Cu I | 155  | 5.72 - | 8.32 4p' 2D | - | 5s'' 2D | 3/2 - | 5/2 |
| 477.6128 Cu I | 17   | 5.42 - | 8.02 4p' 2F | - | 5s' 2D  | 5/2 - | 5/2 |
| 479.7025 Cu I | 9    | 5.15 - | 7.74 4p' 4F | - | 5s' 4D  | 5/2 - | 7/2 |
| 484.2242 Cu I | 14   | 5.24 - | 7.80 4p' 4F | - | 5s' 4D  | 3/2 - | 5/2 |
| 486.6156 Cu I | 324  | 5.78 - | 8.32 4p' 2D | - | 5s'' 2D | 5/2 - | 5/2 |
| 501.6629 Cu I | 123  | 5.52 - | 7.99 4p' 4D | - | 5s' 4D  | 3/2 - | 1/2 |
| 503.4254 Cu I | 93   | 5.42 - | 7.88 4p' 2F | - | 5s' 4D  | 5/2 - | 3/2 |
| 507.6125 Cu I | 179  | 5.57 - | 8.02 4p' 2F | - | 5s' 2D  | 7/2 - | 5/2 |
| 510.5540 Cu I | 31   | 1.39 - | 3.82 4s 2D  | - | 4p 2P   | 5/2 - | 3/2 |
| 511.1915 Cu I | 83   | 5.57 - | 7.99 4p' 4D | - | 5s' 4D  | 1/2 - | 1/2 |
| 514.4098 Cu I | 166  | 5.40 - | 7.80 4p' 4D | - | 5s' 4D  | 7/2 - | 5/2 |
| 515.3240 Cu I | 1649 | 3.79 - | 6.19 4p 2P  | - | 4d 2D   | 1/2 - | 3/2 |
| 520.0897 Cu I | 117  | 5.42 - | 7.80 4p' 2F | - | 5s' 4D  | 5/2 - | 5/2 |
| 521.2774 Cu I | 47   | 5.51 - | 7.88 4p' 4D | - | 5s' 4D  | 5/2 - | 3/2 |
| 521.8200 Cu I | 2993 | 3.82 - | 6.19 4p 2P  | - | 4d 2D   | 3/2 - | 5/2 |
| 522.0100 Cu I | 357  | 3.82 - | 6.19 4p 2P  | - | 4d 2D   | 3/2 - | 3/2 |
| 525.0524 Cu I | 141  | 5.52 - | 7.88 4p' 4D | - | 5s' 4D  | 3/2 - | 3/2 |
| 529.2520 Cu I | 367  | 5.40 - | 7.74 4p' 4D | - | 5s' 4D  | 7/2 - | 7/2 |
| 535.2653 Cu I | 24   | 5.42 - | 7.74 4p' 2F | - | 5s' 4D  | 5/2 - | 7/2 |
| 535.4995 Cu I | 71   | 5.57 - | 7.88 4p' 4D | - | 5s' 4D  | 1/2 - | 3/2 |
| 536.0066 Cu I | 22   | 5.68 - | 7.99 4p' 2P | - | 5s' 4D  | 1/2 - | 1/2 |
| 537.6876 Cu I | 6    | 5.69 - | 7.99 4p' 2P | - | 5s' 4D  | 3/2 - | 1/2 |
| 539.1656 Cu I | 136  | 5.51 - | 7.80 4p' 4D | - | 5s' 4D  | 5/2 - | 5/2 |
| 543.2051 Cu I | 78   | 5.52 - | 7.80 4p' 4D | - | 5s' 4D  | 3/2 - | 5/2 |
| 546.3124 Cu I | 16   | 5.72 - | 7.99 4p' 2D | - | 5s' 4D  | 3/2 - | 1/2 |
| 555.4923 Cu I | 23   | 5.51 - | 7.74 4p' 4D | - | 5s' 4D  | 5/2 - | 7/2 |

|               |     |        |              |   |        |       |     |
|---------------|-----|--------|--------------|---|--------|-------|-----|
| 560.9866 Cu I | 3   | 5.35 - | 7.56 5s 2S   | - | 11p 2P | 1/2 - | 3/2 |
| 560.9866 Cu I | 2   | 5.35 - | 7.56 5s 2S   | - | 11p 2P | 1/2 - | 1/2 |
| 570.0240 Cu I | 5   | 1.64 - | 3.82 4s2 2D  | - | 4p 2P  | 3/2 - | 3/2 |
| 572.4250 Cu I | 3   | 5.35 - | 7.51 5s 2S   | - | 10p 2P | 1/2 - | 1/2 |
| 572.6513 Cu I | 4   | 5.35 - | 7.51 5s 2S   | - | 10p 2P | 1/2 - | 3/2 |
| 573.2323 Cu I | 17  | 5.57 - | 7.74 4p' 2F  | - | 5s' 4D | 7/2 - | 7/2 |
| 578.2130 Cu I | 20  | 1.64 - | 3.79 4s2 2D  | - | 4p 2P  | 3/2 - | 1/2 |
| 589.8769 Cu I | 4   | 5.35 - | 7.45 5s 2S   | - | 9p 2P  | 1/2 - | 1/2 |
| 590.3855 Cu I | 7   | 5.35 - | 7.45 5s 2S   | - | 9p 2P  | 1/2 - | 3/2 |
| 617.6484 Cu I | 10  | 5.35 - | 7.36 5s 2S   | - | 8p 2P  | 1/2 - | 1/2 |
| 619.4794 Cu I | 15  | 5.35 - | 7.35 5s 2S   | - | 8p 2P  | 1/2 - | 3/2 |
| 622.3715 Cu I | 47  | 6.95 - | 8.94 4p'' 2F | - | 4d' 4F | 7/2 - | 7/2 |
| 632.5370 Cu I | 6   | 5.78 - | 7.74 4p' 2D  | - | 5s' 4D | 5/2 - | 7/2 |
| 647.4223 Cu I | 68  | 7.02 - | 8.94 4p'' 2D | - | 4d' 4F | 5/2 - | 7/2 |
| 648.5189 Cu I | 46  | 7.02 - | 8.94 4p'' 2D | - | 4d' 4D | 5/2 - | 5/2 |
| 650.6381 Cu I | 12  | 7.02 - | 8.93 4p'' 2D | - | 4d' 2G | 5/2 - | 7/2 |
| 654.4519 Cu I | 18  | 7.02 - | 8.92 4p'' 2D | - | 4d' 4P | 5/2 - | 3/2 |
| 655.1017 Cu I | 14  | 6.95 - | 8.84 4p'' 2F | - | 4d' 4F | 7/2 - | 9/2 |
| 658.3458 Cu I | 22  | 7.21 - | 9.09 4p'' 2F | - | 4d' 4F | 5/2 - | 5/2 |
| 659.9604 Cu I | 12  | 6.95 - | 8.83 4p'' 2F | - | 4d' 4P | 7/2 - | 5/2 |
| 662.1626 Cu I | 100 | 6.95 - | 8.82 4p'' 2F | - | 4d' 2F | 7/2 - | 7/2 |
| 662.9719 Cu I | 31  | 7.21 - | 9.08 4p'' 2F | - | 4d' 4G | 5/2 - | 5/2 |
| 667.2183 Cu I | 124 | 7.21 - | 9.06 4p'' 2F | - | 4d' 4G | 5/2 - | 7/2 |
| 674.1418 Cu I | 339 | 6.95 - | 8.79 4p'' 2F | - | 4d' 2G | 7/2 - | 9/2 |
| 674.9647 Cu I | 35  | 5.35 - | 7.18 5s 2S   | - | 7p 2P  | 1/2 - | 3/2 |
| 688.1972 Cu I | 31  | 7.02 - | 8.83 4p'' 2D | - | 4d' 4P | 5/2 - | 5/2 |
| 689.0890 Cu I | 36  | 7.12 - | 8.92 7p 2P   | - | 4d' 4P | 1/2 - | 3/2 |
| 690.5923 Cu I | 166 | 7.02 - | 8.82 4p'' 2D | - | 4d' 2F | 5/2 - | 7/2 |
| 696.8351 Cu I | 15  | 7.02 - | 8.80 4p'' 2D | - | 4d' 4S | 5/2 - | 3/2 |
| 699.9840 Cu I | 3   | 5.35 - | 7.12 5s 2S   | - | 7p 2P  | 1/2 - | 1/2 |
| 715.4277 Cu I | 23  | 7.21 - | 8.94 4p'' 2F | - | 4d' 4F | 5/2 - | 7/2 |
| 793.3130 Cu I | 425 | 3.79 - | 5.35 4p 2P   | - | 5s 2S  | 1/2 - | 1/2 |
| 809.2630 Cu I | 902 | 3.82 - | 5.35 4p 2P   | - | 5s 2S  | 3/2 - | 1/2 |
| 840.7743 Cu I | 20  | 5.35 - | 6.82 5s 2S   | - | 6p 2P  | 1/2 - | 1/2 |
| 844.8877 Cu I | 29  | 6.12 - | 7.59 5p 2P   | - | 11d 2D | 3/2 - | 5/2 |
| 858.3653 Cu I | 10  | 5.35 - | 6.79 5s 2S   | - | 6p 2P  | 1/2 - | 3/2 |
| 863.7384 Cu I | 40  | 6.12 - | 7.56 5p 2P   | - | 10d 2D | 3/2 - | 5/2 |
| 863.7705 Cu I | 5   | 6.12 - | 7.56 5p 2P   | - | 10d 2D | 3/2 - | 3/2 |
| 863.7936 Cu I | 23  | 6.12 - | 7.56 5p 2P   | - | 10d 2D | 1/2 - | 3/2 |
| 891.6487 Cu I | 62  | 6.12 - | 7.51 5p 2P   | - | 9d 2D  | 3/2 - | 5/2 |
| 891.6901 Cu I | 7   | 6.12 - | 7.51 5p 2P   | - | 9d 2D  | 3/2 - | 3/2 |
| 891.7147 Cu I | 34  | 6.12 - | 7.51 5p 2P   | - | 9d 2D  | 1/2 - | 3/2 |



|               |     |        |             |   |        |       |     |
|---------------|-----|--------|-------------|---|--------|-------|-----|
| 906.9615Cu I  | 1   | 6.19 - | 7.56 4d 2D  | - | 11p 2P | 3/2 - | 1/2 |
| 906.9615Cu I  | 0   | 6.19 - | 7.56 4d 2D  | - | 11p 2P | 3/2 - | 3/2 |
| 907.5261Cu I  | 1   | 6.19 - | 7.56 4d 2D  | - | 11p 2P | 5/2 - | 3/2 |
| 935.7766Cu I  | 103 | 6.12 - | 7.45 5p 2P  | - | 8d 2D  | 3/2 - | 5/2 |
| 935.8484Cu I  | 12  | 6.12 - | 7.45 5p 2P  | - | 8d 2D  | 3/2 - | 3/2 |
|               |     |        |             |   |        |       |     |
| 935.8756Cu I  | 57  | 6.12 - | 7.45 5p 2P  | - | 8d 2D  | 1/2 - | 3/2 |
| 937.2399Cu I  | 1   | 6.19 - | 7.51 4d 2D  | - | 10p 2P | 3/2 - | 1/2 |
| 937.8466Cu I  | 1   | 6.19 - | 7.51 4d 2D  | - | 10p 2P | 3/2 - | 3/2 |
| 938.4502Cu I  | 2   | 6.19 - | 7.51 4d 2D  | - | 10p 2P | 5/2 - | 3/2 |
| 973.9236Cu I  | 12  | 6.12 - | 7.40 5p 2P  | - | 9s 2S  | 3/2 - | 1/2 |
|               |     |        |             |   |        |       |     |
| 973.9531Cu I  | 6   | 6.12 - | 7.40 5p 2P  | - | 9s 2S  | 1/2 - | 1/2 |
| 984.9516Cu I  | 1   | 6.19 - | 7.45 4d 2D  | - | 9p 2P  | 3/2 - | 1/2 |
| 986.3704Cu I  | 1   | 6.19 - | 7.45 4d 2D  | - | 9p 2P  | 3/2 - | 3/2 |
| 987.0382Cu I  | 3   | 6.19 - | 7.45 4d 2D  | - | 9p 2P  | 5/2 - | 3/2 |
|               |     |        |             |   |        |       |     |
| 100.1013Cu II | 3   | 2.83 - | 15.22 4s 3D | - | 5p 3F  | 2 -   | 2   |
| 100.4055Cu II | 19  | 2.72 - | 15.07 4s 3D | - | 5p 3D  | 3 -   | 3   |
| 100.4435Cu II | 0   | 2.98 - | 15.32 4s 3D | - | 5p 1D  | 1 -   | 2   |
| 100.6984Cu II | 1   | 2.98 - | 15.29 4s 3D | - | 5p 3D  | 1 -   | 1   |
| 100.7001Cu II | 0   | 3.26 - | 15.57 4s 1D | - | 4p 5P  | 2 -   | 1   |
|               |     |        |             |   |        |       |     |
| 100.8569Cu II | 5   | 2.72 - | 15.01 4s 3D | - | 4p 1F  | 3 -   | 3   |
| 100.8728Cu II | 38  | 2.83 - | 15.12 4s 3D | - | 5p 3D  | 2 -   | 2   |
| 101.0269Cu II | 9   | 3.26 - | 15.53 4s 1D | - | 4p 5P  | 2 -   | 2   |
| 101.0453Cu II | 4   | 3.26 - | 15.53 4s 1D | - | 4p 5P  | 2 -   | 3   |
| 101.0639Cu II | 4   | 2.72 - | 14.99 4s 3D | - | 4p 1D  | 3 -   | 2   |
|               |     |        |             |   |        |       |     |
| 101.1436Cu II | 0   | 2.98 - | 15.23 4s 3D | - | 5p 1P  | 1 -   | 1   |
| 101.1521Cu II | 7   | 2.72 - | 14.98 4s 3D | - | 5p 3F  | 3 -   | 4   |
| 101.2597Cu II | 12  | 2.72 - | 14.96 4s 3D | - | 5p 3F  | 3 -   | 3   |
| 101.2683Cu II | 1   | 2.98 - | 15.22 4s 3D | - | 5p 3F  | 1 -   | 2   |
| 101.3400Cu II | 3   | 2.83 - | 15.07 4s 3D | - | 5p 3D  | 2 -   | 3   |
|               |     |        |             |   |        |       |     |
| 101.7998Cu II | 4   | 2.83 - | 15.01 4s 3D | - | 4p 1F  | 2 -   | 3   |
| 101.8064Cu II | 0   | 2.98 - | 15.15 4s 3D | - | 5p 3P  | 1 -   | 0   |
| 101.8707Cu II | 0   | 2.72 - | 14.89 4s 3D | - | 5p 3P  | 3 -   | 2   |
| 101.9655Cu II | 0   | 2.83 - | 14.99 4s 3D | - | 5p 3P  | 2 -   | 1   |
| 102.0108Cu II | 4   | 2.83 - | 14.99 4s 3D | - | 4p 1D  | 2 -   | 2   |
|               |     |        |             |   |        |       |     |
| 102.0580Cu II | 3   | 2.98 - | 15.12 4s 3D | - | 5p 3D  | 1 -   | 2   |
| 102.2102Cu II | 2   | 2.83 - | 14.96 4s 3D | - | 5p 3F  | 2 -   | 3   |
| 102.7831Cu II | 75  | 3.26 - | 15.32 4s 1D | - | 5p 1D  | 2 -   | 2   |
| 102.8328Cu II | 3   | 2.83 - | 14.89 4s 3D | - | 5p 3P  | 2 -   | 2   |
| 102.9751Cu II | 14  | 2.72 - | 14.76 4s 3D | - | 4p 3F  | 3 -   | 2   |
|               |     |        |             |   |        |       |     |
| 103.0263Cu II | 9   | 2.72 - | 14.75 4s 3D | - | 4p 1G  | 3 -   | 4   |
| 103.0500Cu II | 0   | 3.26 - | 15.29 4s 1D | - | 5p 3D  | 2 -   | 1   |

|               |     |        |       |       |   |       |   |   |   |
|---------------|-----|--------|-------|-------|---|-------|---|---|---|
| 103.1766Cu II | 1   | 2.98 - | 14.99 | 4s 3D | - | 5p 3P | 1 | - | 1 |
| 103.2230Cu II | 1   | 2.98 - | 14.99 | 4s 3D | - | 4p 1D | 1 | - | 2 |
| 103.3568Cu II | 15  | 3.26 - | 15.25 | 4s 1D | - | 5p 1F | 2 | - | 3 |
| 103.5163Cu II | 0   | 3.26 - | 15.23 | 4s 1D | - | 5p 1P | 2 | - | 1 |
| 103.6470Cu II | 43  | 3.26 - | 15.22 | 4s 1D | - | 5p 3F | 2 | - | 2 |
| 103.9348Cu II | 131 | 2.72 - | 14.65 | 4s 3D | - | 4p 3F | 3 | - | 3 |
| 103.9582Cu II | 94  | 2.83 - | 14.76 | 4s 3D | - | 4p 3F | 2 | - | 2 |
| 104.0648Cu II | 0   | 2.98 - | 14.89 | 4s 3D | - | 5p 3P | 1 | - | 2 |
| 104.4519Cu II | 214 | 2.72 - | 14.59 | 4s 3D | - | 4p 3F | 3 | - | 4 |
| 104.4744Cu II | 274 | 3.26 - | 15.12 | 4s 1D | - | 5p 3D | 2 | - | 2 |
| 104.9364Cu II | 88  | 2.83 - | 14.65 | 4s 3D | - | 4p 3F | 2 | - | 3 |
| 104.9755Cu II | 87  | 3.26 - | 15.07 | 4s 1D | - | 5p 3D | 2 | - | 3 |
| 105.0154Cu II | 46  | 2.83 - | 14.64 | 4s 3D | - | 4p 3D | 2 | - | 1 |
| 105.0403Cu II | 45  | 2.72 - | 14.52 | 4s 3D | - | 4p 3D | 3 | - | 2 |
| 105.2175Cu II | 42  | 2.98 - | 14.76 | 4s 3D | - | 4p 3F | 1 | - | 2 |
| 105.4690Cu II | 138 | 3.26 - | 15.01 | 4s 1D | - | 4p 1F | 2 | - | 3 |
| 105.5797Cu II | 114 | 2.72 - | 14.46 | 4s 3D | - | 4p 3G | 3 | - | 3 |
| 105.6468Cu II | 0   | 3.26 - | 14.99 | 4s 1D | - | 5p 3P | 2 | - | 1 |
| 105.6955Cu II | 208 | 3.26 - | 14.99 | 4s 1D | - | 4p 1D | 2 | - | 2 |
| 105.8799Cu II | 211 | 2.72 - | 14.43 | 4s 3D | - | 4p 3D | 3 | - | 3 |
| 105.9096Cu II | 15  | 3.26 - | 14.96 | 4s 1D | - | 5p 3F | 2 | - | 3 |
| 106.0634Cu II | 178 | 2.83 - | 14.52 | 4s 3D | - | 4p 3D | 2 | - | 2 |
| 106.3005Cu II | 138 | 2.98 - | 14.64 | 4s 3D | - | 4p 3D | 1 | - | 1 |
| 106.5782Cu II | 3   | 3.26 - | 14.89 | 4s 1D | - | 5p 3P | 2 | - | 2 |
| 106.6134Cu II | 13  | 2.83 - | 14.46 | 4s 3D | - | 4p 3G | 2 | - | 3 |
| 106.9195Cu II | 88  | 2.83 - | 14.43 | 4s 3D | - | 4p 3D | 2 | - | 3 |
| 107.0311Cu II | 3   | 2.72 - | 14.30 | 4s 3D | - | 4p 3G | 3 | - | 4 |
| 107.3745Cu II | 80  | 2.98 - | 14.52 | 4s 3D | - | 4p 3D | 1 | - | 2 |
| 107.7876Cu II | 3   | 3.26 - | 14.76 | 4s 1D | - | 4p 3F | 2 | - | 2 |
| 108.0463Cu II | 0   | 2.72 - | 14.19 | 4s 3D | - | 4p 5F | 3 | - | 2 |
| 108.6110Cu II | 1   | 2.72 - | 14.13 | 4s 3D | - | 4p 5F | 3 | - | 3 |
| 108.8035Cu II | 0   | 2.83 - | 14.23 | 4s 3D | - | 4p 5F | 2 | - | 1 |
| 108.8395Cu II | 17  | 3.26 - | 14.65 | 4s 1D | - | 4p 3F | 2 | - | 3 |
| 108.9245Cu II | 6   | 3.26 - | 14.64 | 4s 1D | - | 4p 3D | 2 | - | 1 |
| 109.1292Cu II | 1   | 2.83 - | 14.19 | 4s 3D | - | 4p 5F | 2 | - | 2 |
| 109.4402Cu II | 7   | 2.72 - | 14.05 | 4s 3D | - | 4p 5F | 3 | - | 4 |
| 109.7053Cu II | 5   | 2.83 - | 14.13 | 4s 3D | - | 4p 5F | 2 | - | 3 |
| 110.0525Cu II | 1   | 3.26 - | 14.52 | 4s 1D | - | 4p 3D | 2 | - | 2 |
| 110.1836Cu II | 0   | 2.98 - | 14.23 | 4s 3D | - | 4p 5F | 1 | - | 1 |
| 110.5022Cu II | 0   | 2.72 - | 13.94 | 4s 3D | - | 4p 5G | 3 | - | 2 |
| 110.5176Cu II | 2   | 2.98 - | 14.19 | 4s 3D | - | 4p 5F | 1 | - | 2 |
| 110.6447Cu II | 4   | 3.26 - | 14.46 | 4s 1D | - | 4p 3G | 2 | - | 3 |

|               |    |        |       |       |   |       |   |   |   |
|---------------|----|--------|-------|-------|---|-------|---|---|---|
| 110.9744Cu II | 3  | 3.26 - | 14.43 | 4s 1D | - | 4p 3D | 2 | - | 3 |
| 111.1758Cu II | 1  | 2.72 - | 13.87 | 4s 3D | - | 4p 5G | 3 | - | 3 |
| 111.6351Cu II | 0  | 2.83 - | 13.94 | 4s 3D | - | 4p 5G | 2 | - | 2 |
| 111.9947Cu II | 2  | 2.72 - | 13.79 | 4s 3D | - | 4p 5G | 3 | - | 4 |
| 112.3226Cu II | 1  | 2.83 - | 13.87 | 4s 3D | - | 4p 5G | 2 | - | 3 |
| 113.0053Cu II | 0  | 3.26 - | 14.23 | 4s 1D | - | 4p 5F | 2 | - | 1 |
| 113.0774Cu II | 0  | 2.72 - | 13.68 | 4s 3D | - | 4p 5D | 3 | - | 2 |
| 113.0885Cu II | 1  | 2.98 - | 13.94 | 4s 3D | - | 4p 5G | 1 | - | 2 |
| 113.2792Cu II | 0  | 2.83 - | 13.78 | 4s 3D | - | 4p 5D | 2 | - | 1 |
| 113.3567Cu II | 0  | 3.26 - | 14.19 | 4s 1D | - | 4p 5F | 2 | - | 2 |
| 113.9785Cu II | 0  | 3.26 - | 14.13 | 4s 1D | - | 4p 5F | 2 | - | 3 |
| 114.2640Cu II | 3  | 2.83 - | 13.68 | 4s 3D | - | 4p 5D | 2 | - | 2 |
| 114.4856Cu II | 4  | 2.72 - | 13.55 | 4s 3D | - | 4p 5D | 3 | - | 3 |
| 114.7760Cu II | 1  | 2.98 - | 13.78 | 4s 3D | - | 4p 5D | 1 | - | 1 |
| 115.7021Cu II | 1  | 2.83 - | 13.55 | 4s 3D | - | 4p 5D | 2 | - | 3 |
| 115.7872Cu II | 1  | 2.98 - | 13.68 | 4s 3D | - | 4p 5D | 1 | - | 2 |
| 116.0630Cu II | 0  | 3.26 - | 13.94 | 4s 1D | - | 4p 5G | 2 | - | 2 |
| 116.2601Cu II | 1  | 2.72 - | 13.38 | 4s 3D | - | 4p 5D | 3 | - | 4 |
| 116.8063Cu II | 0  | 3.26 - | 13.87 | 4s 1D | - | 4p 5G | 2 | - | 3 |
| 117.8411Cu II | 0  | 3.26 - | 13.78 | 4s 1D | - | 4p 5D | 2 | - | 1 |
| 118.5343Cu II | 1  | 8.23 - | 18.69 | 4p 3P | - | 8s 3D | 2 | - | 2 |
| 118.5899Cu II | 14 | 8.23 - | 18.69 | 4p 3P | - | 8s 3D | 2 | - | 3 |
| 118.9073Cu II | 0  | 3.26 - | 13.68 | 4s 1D | - | 4p 5D | 2 | - | 2 |
| 120.4653Cu II | 0  | 3.26 - | 13.55 | 4s 1D | - | 4p 5D | 2 | - | 3 |
| 120.6769Cu II | 5  | 8.42 - | 18.69 | 4p 3P | - | 8s 3D | 1 | - | 2 |
| 121.4555Cu II | 17 | 8.49 - | 18.69 | 4p 3F | - | 8s 3D | 3 | - | 2 |
| 121.5138Cu II | 4  | 8.49 - | 18.69 | 4p 3F | - | 8s 3D | 3 | - | 3 |
| 121.6193Cu II | 1  | 8.23 - | 18.43 | 4p 3P | - | 6d 3F | 2 | - | 2 |
| 121.6361Cu II | 5  | 8.23 - | 18.43 | 4p 3P | - | 6d 1F | 2 | - | 3 |
| 121.7415Cu II | 2  | 8.23 - | 18.42 | 4p 3P | - | 6d 1D | 2 | - | 2 |
| 121.7984Cu II | 1  | 8.23 - | 18.41 | 4p 3P | - | 6d 3D | 2 | - | 1 |
| 121.8575Cu II | 0  | 8.23 - | 18.41 | 4p 3P | - | 6d 3G | 2 | - | 3 |
| 121.9334Cu II | 27 | 8.52 - | 18.69 | 4p 3F | - | 8s 3D | 4 | - | 3 |
| 122.0363Cu II | 0  | 8.23 - | 18.39 | 4p 3P | - | 6d 1P | 2 | - | 1 |
| 123.0223Cu II | 4  | 8.42 - | 18.50 | 4p 3P | - | 6d 1S | 1 | - | 0 |
| 123.5873Cu II | 4  | 8.66 - | 18.69 | 4p 3F | - | 8s 3D | 2 | - | 2 |
| 123.6477Cu II | 1  | 8.66 - | 18.69 | 4p 3F | - | 8s 3D | 2 | - | 3 |
| 123.8759Cu II | 1  | 8.42 - | 18.43 | 4p 3P | - | 6d 3F | 1 | - | 2 |
| 124.0027Cu II | 26 | 8.42 - | 18.42 | 4p 3P | - | 6d 1D | 1 | - | 2 |
| 124.0618Cu II | 2  | 8.42 - | 18.41 | 4p 3P | - | 6d 3D | 1 | - | 1 |
| 124.1964Cu II | 2  | 8.23 - | 18.22 | 4p 3P | - | 7s 1D | 2 | - | 2 |

|               |     |        |       |        |   |       |   |   |   |
|---------------|-----|--------|-------|--------|---|-------|---|---|---|
| 124.2738Cu II | 1   | 8.23 - | 18.21 | 4p 3P  | - | 7s 3D | 2 | - | 1 |
| 124.3086Cu II | 20  | 8.42 - | 18.39 | 4p 3P  | - | 6d 1P | 1 | - | 1 |
| 124.6965Cu II | 1   | 8.49 - | 18.43 | 4p 3F  | - | 6d 3F | 3 | - | 2 |
| 124.7142Cu II | 3   | 8.49 - | 18.43 | 4p 3F  | - | 6d 1F | 3 | - | 3 |
| 124.7561Cu II | 2   | 8.23 - | 18.17 | 4p 3P  | - | 6d 3D | 2 | - | 2 |
| 124.7852Cu II | 1   | 8.23 - | 18.17 | 4p 3P  | - | 6d 3F | 2 | - | 3 |
| 124.8249Cu II | 0   | 8.49 - | 18.42 | 4p 3F  | - | 6d 1D | 3 | - | 2 |
| 124.8792Cu II | 43  | 8.23 - | 18.16 | 4p 3P  | - | 6d 3D | 2 | - | 3 |
| 124.8942Cu II | 9   | 8.49 - | 18.41 | 4p 3F  | - | 6d 1G | 3 | - | 4 |
| 124.9469Cu II | 1   | 8.49 - | 18.41 | 4p 3F  | - | 6d 3G | 3 | - | 3 |
| 124.9856Cu II | 7   | 8.23 - | 18.15 | 4p 3P  | - | 6d 3P | 2 | - | 1 |
| 125.0048Cu II | 66  | 8.23 - | 18.15 | 4p 3P  | - | 6d 3P | 2 | - | 2 |
| 125.0923Cu II | 4   | 8.78 - | 18.69 | 4p 3D  | - | 8s 3D | 3 | - | 2 |
| 125.1542Cu II | 7   | 8.78 - | 18.69 | 4p 3D  | - | 8s 3D | 3 | - | 3 |
| 125.3181Cu II | 53  | 8.23 - | 18.13 | 4p 3P  | - | 6d 3S | 2 | - | 1 |
| 125.3374Cu II | 0   | 8.52 - | 18.41 | 4p 3F  | - | 6d 1G | 4 | - | 4 |
| 125.5157Cu II | 22  | 8.54 - | 18.41 | 4p 3P  | - | 6d 3D | 0 | - | 1 |
| 125.7683Cu II | 14  | 8.54 - | 18.39 | 4p 3P  | - | 6d 1P | 0 | - | 1 |
| 126.1215Cu II | 11  | 8.86 - | 18.69 | 4p 3D  | - | 8s 3D | 2 | - | 2 |
| 126.1845Cu II | 1   | 8.86 - | 18.69 | 4p 3D  | - | 8s 3D | 2 | - | 3 |
| 126.2925Cu II | 15  | 8.42 - | 18.24 | 4p 3P  | - | 6d 3P | 1 | - | 0 |
| 126.5506Cu II | 8   | 8.42 - | 18.22 | 4p 3P  | - | 7s 1D | 1 | - | 2 |
| 126.6310Cu II | 3   | 8.42 - | 18.21 | 4p 3P  | - | 7s 3D | 1 | - | 1 |
| 126.8032Cu II | 1   | 8.92 - | 18.69 | 4p 1F  | - | 8s 3D | 3 | - | 2 |
| 126.8669Cu II | 10  | 8.92 - | 18.69 | 4p 1F  | - | 8s 3D | 3 | - | 3 |
| 126.9446Cu II | 23  | 8.66 - | 18.43 | 4p 3F  | - | 6d 3F | 2 | - | 2 |
| 126.9630Cu II | 1   | 8.66 - | 18.43 | 4p 3F  | - | 6d 1F | 2 | - | 3 |
| 127.0352Cu II | 4   | 8.87 - | 18.63 | 4s2 3F | - | 4p 3F | 3 | - | 2 |
| 127.0778Cu II | 3   | 8.66 - | 18.42 | 4p 3F  | - | 6d 1D | 2 | - | 2 |
| 127.1318Cu II | 18  | 8.42 - | 18.17 | 4p 3P  | - | 6d 3D | 1 | - | 2 |
| 127.1398Cu II | 3   | 8.66 - | 18.41 | 4p 3F  | - | 6d 3D | 2 | - | 1 |
| 127.2042Cu II | 102 | 8.66 - | 18.41 | 4p 3F  | - | 6d 3G | 2 | - | 3 |
| 127.3701Cu II | 18  | 8.42 - | 18.15 | 4p 3P  | - | 6d 3P | 1 | - | 1 |
| 127.3990Cu II | 1   | 8.66 - | 18.39 | 4p 3F  | - | 6d 1P | 2 | - | 1 |
| 127.4071Cu II | 2   | 8.49 - | 18.22 | 4p 3F  | - | 7s 1D | 3 | - | 2 |
| 127.4465Cu II | 2   | 8.23 - | 17.96 | 4p 3P  | - | 7s 3D | 2 | - | 2 |
| 127.5572Cu II | 30  | 8.23 - | 17.95 | 4p 3P  | - | 7s 3D | 2 | - | 3 |
| 127.7154Cu II | 6   | 8.42 - | 18.13 | 4p 3P  | - | 6d 3S | 1 | - | 1 |
| 127.9961Cu II | 6   | 8.49 - | 18.17 | 4p 3F  | - | 6d 3D | 3 | - | 2 |
| 128.0214Cu II | 1   | 8.49 - | 18.17 | 4p 3F  | - | 6d 3F | 3 | - | 4 |
| 128.0268Cu II | 47  | 8.49 - | 18.17 | 4p 3F  | - | 6d 3F | 3 | - | 3 |
| 128.1257Cu II | 7   | 8.49 - | 18.16 | 4p 3F  | - | 6d 3D | 3 | - | 3 |

|                |     |        |       |        |   |       |   |   |   |
|----------------|-----|--------|-------|--------|---|-------|---|---|---|
| 128.1462 Cu II | 7   | 8.54 - | 18.21 | 4p 3P  | - | 7s 3D | 0 | - | 1 |
| 128.2455 Cu II | 165 | 8.49 - | 18.15 | 4p 3F  | - | 6d 3G | 3 | - | 4 |
| 128.2580 Cu II | 6   | 8.49 - | 18.15 | 4p 3F  | - | 6d 3P | 3 | - | 2 |
| 128.4871 Cu II | 59  | 8.52 - | 18.17 | 4p 3F  | - | 6d 3F | 4 | - | 4 |
| 128.4926 Cu II | 1   | 8.52 - | 18.17 | 4p 3F  | - | 6d 3F | 4 | - | 3 |
| 128.5330 Cu II | 2   | 8.78 - | 18.43 | 4p 3D  | - | 6d 3F | 3 | - | 2 |
| 128.5519 Cu II | 20  | 8.78 - | 18.43 | 4p 3D  | - | 6d 1F | 3 | - | 3 |
| 128.5922 Cu II | 13  | 8.52 - | 18.16 | 4p 3F  | - | 6d 3D | 4 | - | 3 |
| 128.6695 Cu II | 2   | 8.78 - | 18.42 | 4p 3D  | - | 6d 1D | 3 | - | 2 |
| 128.7129 Cu II | 12  | 8.52 - | 18.15 | 4p 3F  | - | 6d 3G | 4 | - | 4 |
| 128.7326 Cu II | 2   | 9.06 - | 18.69 | 4p 3D  | - | 8s 3D | 1 | - | 2 |
| 128.7468 Cu II | 84  | 8.78 - | 18.41 | 4p 3D  | - | 6d 1G | 3 | - | 4 |
| 128.7468 Cu II | 226 | 8.52 - | 18.15 | 4p 3F  | - | 6d 3G | 4 | - | 5 |
| 128.7991 Cu II | 5   | 8.78 - | 18.41 | 4p 3D  | - | 6d 3G | 3 | - | 3 |
| 128.9889 Cu II | 4   | 9.02 - | 18.63 | 4s2 3F | - | 4p 3F | 2 | - | 2 |
| 129.1503 Cu II | 0   | 9.09 - | 18.69 | 4p 1D  | - | 8s 3D | 2 | - | 2 |
| 129.2163 Cu II | 1   | 9.09 - | 18.69 | 4p 1D  | - | 8s 3D | 2 | - | 3 |
| 129.2568 Cu II | 1   | 8.54 - | 18.13 | 4p 3P  | - | 6d 3S | 0 | - | 1 |
| 129.5561 Cu II | 4   | 9.12 - | 18.69 | 4p 1P  | - | 8s 3D | 1 | - | 2 |
| 129.6199 Cu II | 7   | 8.86 - | 18.43 | 4p 3D  | - | 6d 3F | 2 | - | 2 |
| 129.6391 Cu II | 1   | 8.86 - | 18.43 | 4p 3D  | - | 6d 1F | 2 | - | 3 |
| 129.7550 Cu II | 4   | 8.66 - | 18.22 | 4p 3F  | - | 7s 1D | 2 | - | 2 |
| 129.7587 Cu II | 1   | 8.86 - | 18.42 | 4p 3D  | - | 6d 1D | 2 | - | 2 |
| 129.8234 Cu II | 1   | 8.86 - | 18.41 | 4p 3D  | - | 6d 3D | 2 | - | 1 |
| 129.8395 Cu II | 20  | 8.66 - | 18.21 | 4p 3F  | - | 7s 3D | 2 | - | 1 |
| 129.8905 Cu II | 35  | 8.86 - | 18.41 | 4p 3D  | - | 6d 3G | 2 | - | 3 |
| 129.9268 Cu II | 9   | 8.42 - | 17.96 | 4p 3P  | - | 7s 3D | 1 | - | 2 |
| 130.0937 Cu II | 0   | 8.86 - | 18.39 | 4p 3D  | - | 6d 1P | 2 | - | 1 |
| 130.3401 Cu II | 2   | 8.92 - | 18.43 | 4p 1F  | - | 6d 3F | 3 | - | 2 |
| 130.3594 Cu II | 18  | 8.92 - | 18.43 | 4p 1F  | - | 6d 1F | 3 | - | 3 |
| 130.3660 Cu II | 14  | 8.66 - | 18.17 | 4p 3F  | - | 6d 3D | 2 | - | 2 |
| 130.3978 Cu II | 25  | 8.66 - | 18.17 | 4p 3F  | - | 6d 3F | 2 | - | 3 |
| 130.4804 Cu II | 2   | 8.92 - | 18.42 | 4p 1F  | - | 6d 1D | 3 | - | 2 |
| 130.5004 Cu II | 0   | 8.66 - | 18.16 | 4p 3F  | - | 6d 3D | 2 | - | 3 |
| 130.5561 Cu II | 92  | 8.92 - | 18.41 | 4p 1F  | - | 6d 1G | 3 | - | 4 |
| 130.6137 Cu II | 5   | 8.92 - | 18.41 | 4p 1F  | - | 6d 3G | 3 | - | 3 |
| 130.6166 Cu II | 5   | 8.66 - | 18.15 | 4p 3F  | - | 6d 3P | 2 | - | 1 |
| 130.6376 Cu II | 1   | 8.66 - | 18.15 | 4p 3F  | - | 6d 3P | 2 | - | 2 |
| 130.8297 Cu II | 34  | 8.49 - | 17.96 | 4p 3F  | - | 7s 3D | 3 | - | 2 |
| 130.9463 Cu II | 8   | 8.49 - | 17.95 | 4p 3F  | - | 7s 3D | 3 | - | 3 |
| 131.4149 Cu II | 21  | 8.78 - | 18.22 | 4p 3D  | - | 7s 1D | 3 | - | 2 |
| 131.4337 Cu II | 56  | 8.52 - | 17.95 | 4p 3F  | - | 7s 3D | 4 | - | 3 |

|               |    |        |       |       |   |       |   |   |   |
|---------------|----|--------|-------|-------|---|-------|---|---|---|
| 132.0418Cu II | 2  | 8.78 - | 18.17 | 4p 3D | - | 6d 3D | 3 | - | 2 |
| 132.0686Cu II | 69 | 8.78 - | 18.17 | 4p 3D | - | 6d 3F | 3 | - | 4 |
| 132.0744Cu II | 4  | 8.78 - | 18.17 | 4p 3D | - | 6d 3F | 3 | - | 3 |
| 132.1796Cu II | 35 | 8.78 - | 18.16 | 4p 3D | - | 6d 3D | 3 | - | 3 |
| 132.2633Cu II | 17 | 9.12 - | 18.50 | 4p 1P | - | 6d 1S | 1 | - | 0 |
| 132.3071Cu II | 8  | 8.78 - | 18.15 | 4p 3D | - | 6d 3G | 3 | - | 4 |
| 132.3204Cu II | 12 | 8.78 - | 18.15 | 4p 3D | - | 6d 3P | 3 | - | 2 |
| 132.3794Cu II | 32 | 9.06 - | 18.43 | 4p 3D | - | 6d 3F | 1 | - | 2 |
| 132.5242Cu II | 31 | 9.06 - | 18.42 | 4p 3D | - | 6d 1D | 1 | - | 2 |
| 132.5513Cu II | 2  | 8.86 - | 18.22 | 4p 3D | - | 7s 1D | 2 | - | 2 |
| 132.5917Cu II | 17 | 9.06 - | 18.41 | 4p 3D | - | 6d 3D | 1 | - | 1 |
| 132.6395Cu II | 7  | 8.86 - | 18.21 | 4p 3D | - | 7s 3D | 2 | - | 1 |
| 132.8212Cu II | 16 | 9.09 - | 18.43 | 4p 1D | - | 6d 3F | 2 | - | 2 |
| 132.8413Cu II | 96 | 9.09 - | 18.43 | 4p 1D | - | 6d 1F | 2 | - | 3 |
| 132.8736Cu II | 6  | 9.06 - | 18.39 | 4p 3D | - | 6d 1P | 1 | - | 1 |
| 132.9670Cu II | 35 | 9.09 - | 18.42 | 4p 1D | - | 6d 1D | 2 | - | 2 |
| 133.0349Cu II | 4  | 9.09 - | 18.41 | 4p 1D | - | 6d 3D | 2 | - | 1 |
| 133.1053Cu II | 1  | 9.09 - | 18.41 | 4p 1D | - | 6d 3G | 2 | - | 3 |
| 133.1891Cu II | 44 | 8.86 - | 18.17 | 4p 3D | - | 6d 3D | 2 | - | 2 |
| 133.2223Cu II | 67 | 8.86 - | 18.17 | 4p 3D | - | 6d 3F | 2 | - | 3 |
| 133.2504Cu II | 20 | 9.12 - | 18.43 | 4p 1P | - | 6d 3F | 1 | - | 2 |
| 133.3045Cu II | 21 | 8.92 - | 18.22 | 4p 1F | - | 7s 1D | 3 | - | 2 |
| 133.3067Cu II | 7  | 8.66 - | 17.96 | 4p 3F | - | 7s 3D | 2 | - | 2 |
| 133.3187Cu II | 10 | 9.09 - | 18.39 | 4p 1D | - | 6d 1P | 2 | - | 1 |
| 133.3293Cu II | 1  | 8.86 - | 18.16 | 4p 3D | - | 6d 3D | 2 | - | 3 |
| 133.3971Cu II | 4  | 9.12 - | 18.42 | 4p 1P | - | 6d 1D | 1 | - | 2 |
| 133.4278Cu II | 1  | 8.66 - | 17.95 | 4p 3F | - | 7s 3D | 2 | - | 3 |
| 133.4506Cu II | 13 | 8.86 - | 18.15 | 4p 3D | - | 6d 3P | 2 | - | 1 |
| 133.4655Cu II | 16 | 9.12 - | 18.41 | 4p 1P | - | 6d 3D | 1 | - | 1 |
| 133.4726Cu II | 2  | 8.86 - | 18.15 | 4p 3D | - | 6d 3P | 2 | - | 2 |
| 133.7511Cu II | 13 | 9.12 - | 18.39 | 4p 1P | - | 6d 1P | 1 | - | 1 |
| 133.8298Cu II | 0  | 8.86 - | 18.13 | 4p 3D | - | 6d 3S | 2 | - | 1 |
| 133.9495Cu II | 1  | 8.92 - | 18.17 | 4p 1F | - | 6d 3D | 3 | - | 2 |
| 133.9771Cu II | 55 | 8.92 - | 18.17 | 4p 1F | - | 6d 3F | 3 | - | 4 |
| 133.9831Cu II | 1  | 8.92 - | 18.17 | 4p 1F | - | 6d 3F | 3 | - | 3 |
| 134.0914Cu II | 45 | 8.92 - | 18.16 | 4p 1F | - | 6d 3D | 3 | - | 3 |
| 134.2226Cu II | 2  | 8.92 - | 18.15 | 4p 1F | - | 6d 3G | 3 | - | 4 |
| 134.2363Cu II | 17 | 8.92 - | 18.15 | 4p 1F | - | 6d 3P | 3 | - | 2 |
| 135.0594Cu II | 8  | 8.78 - | 17.96 | 4p 3D | - | 7s 3D | 3 | - | 2 |
| 135.1428Cu II | 4  | 9.06 - | 18.24 | 4p 3D | - | 6d 3P | 1 | - | 0 |
| 135.1837Cu II | 15 | 8.78 - | 17.95 | 4p 3D | - | 7s 3D | 3 | - | 3 |

|               |     |        |              |        |       |       |   |   |   |
|---------------|-----|--------|--------------|--------|-------|-------|---|---|---|
| 135.4384Cu II | 1   | 9.06 - | 18.22        | 4p 3D  | -     | 7s 1D | 1 | - | 2 |
| 135.5305Cu II | 15  | 9.06 - | 18.21        | 4p 3D  | -     | 7s 3D | 1 | - | 1 |
| 135.8773Cu II | 540 | 0.00 - | 9.12 3d10 1S | -      | 4p 1P | 0     | - | 1 |   |
| 135.9009Cu II | 24  | 9.09 - | 18.22        | 4p 1D  | -     | 7s 1D | 2 | - | 2 |
| 135.9936Cu II | 5   | 9.09 - | 18.21        | 4p 1D  | -     | 7s 3D | 2 | - | 1 |
| 136.0507Cu II | 3   | 9.12 - | 18.24        | 4p 1P  | -     | 6d 3P | 1 | - | 0 |
| 136.1043Cu II | 6   | 9.06 - | 18.17        | 4p 3D  | -     | 6d 3D | 1 | - | 2 |
| 136.2600Cu II | 22  | 8.86 - | 17.96        | 4p 3D  | -     | 7s 3D | 2 | - | 2 |
| 136.3503Cu II | 11  | 9.12 - | 18.22        | 4p 1P  | -     | 7s 1D | 1 | - | 2 |
| 136.3775Cu II | 7   | 9.06 - | 18.15        | 4p 3D  | -     | 6d 3P | 1 | - | 1 |
| 136.3865Cu II | 1   | 8.86 - | 17.95        | 4p 3D  | -     | 7s 3D | 2 | - | 3 |
| 136.4436Cu II | 1   | 9.12 - | 18.21        | 4p 1P  | -     | 7s 3D | 1 | - | 1 |
| 136.5714Cu II | 0   | 9.09 - | 18.17        | 4p 1D  | -     | 6d 3D | 2 | - | 2 |
| 136.6063Cu II | 0   | 9.09 - | 18.17        | 4p 1D  | -     | 6d 3F | 2 | - | 3 |
| 136.7188Cu II | 2   | 9.09 - | 18.16        | 4p 1D  | -     | 6d 3D | 2 | - | 3 |
| 136.7735Cu II | 1   | 9.06 - | 18.13        | 4p 3D  | -     | 6d 3S | 1 | - | 1 |
| 136.7951Cu II | 34  | 0.00 - | 9.06 3d10 1S | -      | 4p 3D | 0     | - | 1 |   |
| 136.8464Cu II | 1   | 9.09 - | 18.15        | 4p 1D  | -     | 6d 3P | 2 | - | 1 |
| 136.8695Cu II | 3   | 9.09 - | 18.15        | 4p 1D  | -     | 6d 3P | 2 | - | 2 |
| 137.0252Cu II | 13  | 9.12 - | 18.17        | 4p 1P  | -     | 6d 3D | 1 | - | 2 |
| 137.0560Cu II | 2   | 8.92 - | 17.96        | 4p 1F  | -     | 7s 3D | 3 | - | 2 |
| 137.1840Cu II | 21  | 8.92 - | 17.95        | 4p 1F  | -     | 7s 3D | 3 | - | 3 |
| 137.2451Cu II | 2   | 9.09 - | 18.13        | 4p 1D  | -     | 6d 3S | 2 | - | 1 |
| 137.3021Cu II | 14  | 9.12 - | 18.15        | 4p 1P  | -     | 6d 3P | 1 | - | 1 |
| 137.5074Cu II | 3   | 8.23 - | 17.25        | 4p 3P  | -     | 5d 3F | 2 | - | 2 |
| 137.5502Cu II | 13  | 8.23 - | 17.25        | 4p 3P  | -     | 5d 1F | 2 | - | 3 |
| 137.6031Cu II | 4   | 8.42 - | 17.43        | 4p 3P  | -     | 5d 1S | 1 | - | 0 |
| 137.7035Cu II | 3   | 9.12 - | 18.13        | 4p 1P  | -     | 6d 3S | 1 | - | 1 |
| 137.8122Cu II | 4   | 8.23 - | 17.23        | 4p 3P  | -     | 5d 1D | 2 | - | 2 |
| 137.9698Cu II | 1   | 8.23 - | 17.22        | 4p 3P  | -     | 5d 3D | 2 | - | 1 |
| 138.1208Cu II | 0   | 8.23 - | 17.21        | 4p 3P  | -     | 5d 3G | 2 | - | 3 |
| 138.5534Cu II | 1   | 8.23 - | 17.18        | 4p 3P  | -     | 5d 1P | 2 | - | 1 |
| 139.3128Cu II | 3   | 9.06 - | 17.96        | 4p 3D  | -     | 7s 3D | 1 | - | 2 |
| 139.8021Cu II | 0   | 9.09 - | 17.96        | 4p 1D  | -     | 7s 3D | 2 | - | 2 |
| 139.8642Cu II | 62  | 8.64 - | 17.51        | 4s2 3F | -     | 6p 1F | 4 | - | 3 |
| 139.9353Cu II | 2   | 9.09 - | 17.95        | 4p 1D  | -     | 7s 3D | 2 | - | 3 |
| 140.2777Cu II | 7   | 9.12 - | 17.96        | 4p 1P  | -     | 7s 3D | 1 | - | 2 |
| 140.3992Cu II | 2   | 8.42 - | 17.25        | 4p 3P  | -     | 5d 3F | 1 | - | 2 |
| 140.7169Cu II | 75  | 8.42 - | 17.23        | 4p 3P  | -     | 5d 1D | 1 | - | 2 |
| 140.8812Cu II | 8   | 8.42 - | 17.22        | 4p 3P  | -     | 5d 3D | 1 | - | 1 |
| 141.4541Cu II | 1   | 8.49 - | 17.25        | 4p 3F  | -     | 5d 3F | 3 | - | 2 |
| 141.4898Cu II | 58  | 8.42 - | 17.18        | 4p 3P  | -     | 5d 1P | 1 | - | 1 |

|               |     |        |       |        |   |       |   |   |   |
|---------------|-----|--------|-------|--------|---|-------|---|---|---|
| 141.4994Cu II | 8   | 8.49 - | 17.25 | 4p 3F  | - | 5d 1F | 3 | - | 3 |
| 141.5329Cu II | 0   | 8.23 - | 17.00 | 4p 3P  | - | 5d 3D | 2 | - | 2 |
| 141.6108Cu II | 1   | 8.23 - | 16.99 | 4p 3P  | - | 5d 3F | 2 | - | 3 |
| 141.7766Cu II | 1   | 8.49 - | 17.23 | 4p 3F  | - | 5d 1D | 3 | - | 2 |
| 141.8426Cu II | 137 | 8.23 - | 16.98 | 4p 3P  | - | 5d 3D | 2 | - | 3 |
| 141.9746Cu II | 24  | 8.49 - | 17.22 | 4p 3F  | - | 5d 1G | 3 | - | 4 |
| 142.0686Cu II | 0   | 8.52 - | 17.25 | 4p 3F  | - | 5d 1F | 4 | - | 3 |
| 142.1033Cu II | 0   | 8.49 - | 17.21 | 4p 3F  | - | 5d 3G | 3 | - | 3 |
| 142.1374Cu II | 25  | 8.23 - | 16.96 | 4p 3P  | - | 5d 3P | 2 | - | 1 |
| 142.1759Cu II | 215 | 8.23 - | 16.96 | 4p 3P  | - | 5d 3P | 2 | - | 2 |
| 142.4448Cu II | 154 | 8.87 - | 17.57 | 4s2 3F | - | 6p 3F | 3 | - | 2 |
| 142.5476Cu II | 1   | 8.52 - | 17.22 | 4p 3F  | - | 5d 1G | 4 | - | 4 |
| 142.6774Cu II | 0   | 8.52 - | 17.21 | 4p 3F  | - | 5d 3G | 4 | - | 3 |
| 142.7591Cu II | 60  | 8.54 - | 17.22 | 4p 3P  | - | 5d 3D | 0 | - | 1 |
| 142.7829Cu II | 6   | 8.64 - | 17.33 | 4s2 3F | - | 6p 3D | 4 | - | 3 |
| 142.8358Cu II | 127 | 8.87 - | 17.55 | 4s2 3F | - | 6p 1D | 3 | - | 2 |
| 143.0243Cu II | 163 | 8.23 - | 16.90 | 4p 3P  | - | 5d 3S | 2 | - | 1 |
| 143.3840Cu II | 51  | 8.54 - | 17.18 | 4p 3P  | - | 5d 1P | 0 | - | 1 |
| 143.4770Cu II | 54  | 8.42 - | 17.06 | 4p 3P  | - | 5d 3P | 1 | - | 0 |
| 143.4904Cu II | 994 | 8.64 - | 17.28 | 4s2 3F | - | 6p 3F | 4 | - | 4 |
| 143.5316Cu II | 320 | 8.87 - | 17.51 | 4s2 3F | - | 6p 1F | 3 | - | 3 |
| 143.6236Cu II | 444 | 8.64 - | 17.28 | 4s2 3F | - | 6p 3F | 4 | - | 3 |
| 144.2139Cu II | 4   | 8.23 - | 16.83 | 4p 3P  | - | 6s 1D | 2 | - | 2 |
| 144.3542Cu II | 70  | 8.66 - | 17.25 | 4p 3F  | - | 5d 3F | 2 | - | 2 |
| 144.4013Cu II | 2   | 8.66 - | 17.25 | 4p 3F  | - | 5d 1F | 2 | - | 3 |
| 144.4130Cu II | 1   | 8.23 - | 16.82 | 4p 3P  | - | 6s 3D | 2 | - | 1 |
| 144.5984Cu II | 61  | 8.42 - | 17.00 | 4p 3P  | - | 5d 3D | 1 | - | 2 |
| 144.6901Cu II | 9   | 8.66 - | 17.23 | 4p 3F  | - | 5d 1D | 2 | - | 2 |
| 144.8638Cu II | 11  | 8.66 - | 17.22 | 4p 3F  | - | 5d 3D | 2 | - | 1 |
| 144.9058Cu II | 580 | 9.02 - | 17.57 | 4s2 3F | - | 6p 3F | 2 | - | 2 |
| 145.0304Cu II | 310 | 8.66 - | 17.21 | 4p 3F  | - | 5d 3G | 2 | - | 3 |
| 145.2294Cu II | 53  | 8.42 - | 16.96 | 4p 3P  | - | 5d 3P | 1 | - | 1 |
| 145.2696Cu II | 2   | 8.42 - | 16.96 | 4p 3P  | - | 5d 3P | 1 | - | 2 |
| 145.3104Cu II | 176 | 9.02 - | 17.55 | 4s2 3F | - | 6p 1D | 2 | - | 2 |
| 145.5074Cu II | 1   | 8.66 - | 17.18 | 4p 3F  | - | 5d 1P | 2 | - | 1 |
| 145.5662Cu II | 41  | 8.64 - | 17.16 | 4s2 3F | - | 4p 3G | 4 | - | 3 |
| 145.7176Cu II | 24  | 8.49 - | 17.00 | 4p 3F  | - | 5d 3D | 3 | - | 2 |
| 145.7796Cu II | 1   | 8.49 - | 16.99 | 4p 3F  | - | 5d 3F | 3 | - | 4 |
| 145.8002Cu II | 158 | 8.49 - | 16.99 | 4p 3F  | - | 5d 3F | 3 | - | 3 |
| 145.9412Cu II | 287 | 9.02 - | 17.51 | 4s2 3F | - | 6p 3D | 2 | - | 1 |
| 146.0306Cu II | 49  | 9.02 - | 17.51 | 4s2 3F | - | 6p 1F | 2 | - | 3 |
| 146.0459Cu II | 10  | 8.49 - | 16.98 | 4p 3F  | - | 5d 3D | 3 | - | 3 |



|               |      |        |       |         |   |       |   |   |   |   |
|---------------|------|--------|-------|---------|---|-------|---|---|---|---|
| 146.1554Cu II | 22   | 8.42 - | 16.90 | 4p 3P   | - | 5d 3S | 1 | - | 1 |   |
| 146.3752Cu II | 525  | 8.49 - | 16.96 | 4p 3F   | - | 5d 3G | 3 | - | 4 |   |
| 146.3838Cu II | 187  | 8.52 - | 16.99 | 4p 3F   | - | 5d 3F | 4 | - | 4 |   |
| 146.3993Cu II | 13   | 8.49 - | 16.96 | 4p 3F   | - | 5d 3P | 3 | - | 2 |   |
| 146.4046Cu II | 4    | 8.52 - | 16.99 | 4p 3F   | - | 5d 3F | 4 | - | 3 |   |
| 146.4117Cu II | 7    | 8.78 - | 17.25 | 4p 3D   | - | 5d 3F | 3 | - | 2 |   |
| 146.4602Cu II | 67   | 8.78 - | 17.25 | 4p 3D   | - | 5d 1F | 3 | - | 3 |   |
| 146.5036Cu II | 0    | 9.02 - | 17.48 | 4s2 3F  | - | 6p 1P | 2 | - | 1 |   |
| 146.5541Cu II | 541  | 8.64 - | 17.10 | 4s2 3F  | - | 4p 3P | 4 | - | 4 |   |
| 146.6070Cu II | 1362 | 8.87 - | 17.33 | 4s2 3F  | - | 6p 3D | 3 | - | 3 | 3 |
| 146.6524Cu II | 37   | 8.52 - | 16.98 | 4p 3F   | - | 5d 3D | 4 | - | 3 |   |
| 146.6728Cu II | 7    | 8.87 - | 17.32 | 4s2 3F  | - | 6p 3D | 3 | - | 2 |   |
| 146.7572Cu II | 6    | 8.78 - | 17.23 | 4p 3D   | - | 5d 1D | 3 | - | 2 |   |
| 146.9693Cu II | 254  | 8.78 - | 17.22 | 4p 3D   | - | 5d 1G | 3 | - | 4 |   |
| 146.9843Cu II | 33   | 8.52 - | 16.96 | 4p 3F   | - | 5d 3G | 4 | - | 4 |   |
| 147.0697Cu II | 712  | 8.52 - | 16.95 | 4p 3F   | - | 5d 3G | 4 | - | 5 |   |
| 147.1073Cu II | 12   | 8.78 - | 17.21 | 4p 3D   | - | 5d 3G | 3 | - | 3 |   |
| 147.2257Cu II | 0    | 8.54 - | 16.96 | 4p 3P   | - | 5d 3P | 0 | - | 1 |   |
| 147.2395Cu II | 9    | 0.00 - | 8.42  | 3d10 1S | - | 4p 3P | 0 | - | 1 |   |
| 147.3530Cu II | 139  | 8.87 - | 17.28 | 4s2 3F  | - | 6p 3F | 3 | - | 4 |   |
| 147.3978Cu II | 20   | 8.42 - | 16.83 | 4p 3P   | - | 6s 1D | 1 | - | 2 |   |
| 147.4935Cu II | 17   | 8.87 - | 17.28 | 4s2 3F  | - | 6p 3F | 3 | - | 3 |   |
| 147.6059Cu II | 9    | 8.42 - | 16.82 | 4p 3P   | - | 6s 3D | 1 | - | 1 |   |
| 147.8236Cu II | 22   | 8.86 - | 17.25 | 4p 3D   | - | 5d 3F | 2 | - | 2 |   |
| 147.8731Cu II | 1    | 8.86 - | 17.25 | 4p 3D   | - | 5d 1F | 2 | - | 3 |   |
| 148.1544Cu II | 4    | 8.87 - | 17.24 | 4s2 3F  | - | 4p 3D | 3 | - | 2 |   |
| 148.1759Cu II | 1    | 8.86 - | 17.23 | 4p 3D   | - | 5d 1D | 2 | - | 2 |   |
| 148.1760Cu II | 1    | 9.06 - | 17.43 | 4p 3D   | - | 5d 1S | 1 | - | 0 |   |
| 148.1775Cu II | 1    | 8.54 - | 16.90 | 4p 3P   | - | 5d 3S | 0 | - | 1 |   |
| 148.3581Cu II | 3    | 8.86 - | 17.22 | 4p 3D   | - | 5d 3D | 2 | - | 1 |   |
| 148.4168Cu II | 2    | 8.64 - | 17.00 | 4s2 3F  | - | 4p 3G | 4 | - | 5 |   |
| 148.4263Cu II | 0    | 8.64 - | 17.00 | 4s2 3F  | - | 4p 3G | 4 | - | 3 |   |
| 148.5328Cu II | 120  | 8.86 - | 17.21 | 4p 3D   | - | 5d 3G | 2 | - | 3 |   |
| 148.5610Cu II | 5    | 8.49 - | 16.83 | 4p 3F   | - | 6s 1D | 3 | - | 2 |   |
| 148.5678Cu II | 4    | 8.23 - | 16.58 | 4p 3P   | - | 6s 3D | 2 | - | 2 |   |
| 148.7610Cu II | 6    | 8.92 - | 17.25 | 4p 1F   | - | 5d 3F | 3 | - | 2 |   |
| 148.7970Cu II | 43   | 8.66 - | 17.00 | 4p 3F   | - | 5d 3D | 2 | - | 2 |   |
| 148.8110Cu II | 54   | 8.92 - | 17.25 | 4p 1F   | - | 5d 1F | 3 | - | 3 |   |
| 148.8637Cu II | 85   | 8.23 - | 16.56 | 4p 3P   | - | 6s 3D | 2 | - | 3 |   |
| 148.8831Cu II | 87   | 8.66 - | 16.99 | 4p 3F   | - | 5d 3F | 2 | - | 3 |   |
| 149.0331Cu II | 0    | 8.86 - | 17.18 | 4p 3D   | - | 5d 1P | 2 | - | 1 |   |

|               |      |        |       |        |   |       |   |   |   |  |
|---------------|------|--------|-------|--------|---|-------|---|---|---|--|
| 149.1177Cu II | 4    | 8.92 - | 17.23 | 4p 1F  | - | 5d 1D | 3 | - | 2 |  |
| 149.1394Cu II | 2    | 8.66 - | 16.98 | 4p 3F  | - | 5d 3D | 2 | - | 3 |  |
| 149.2153Cu II | 248  | 9.02 - | 17.33 | 4s2 3F | - | 6p 3D | 2 | - | 3 |  |
| 149.2682Cu II | 61   | 9.12 - | 17.43 | 4p 1P  | - | 5d 1S | 1 | - | 0 |  |
| 149.2834Cu II | 1    | 8.64 - | 16.95 | 4s2 3F | - | 4p 3G | 4 | - | 4 |  |
| 149.2834Cu II | 1343 | 9.02 - | 17.32 | 4s2 3F | - | 6p 3D | 2 | - | 2 |  |
| 149.3366Cu II | 302  | 8.92 - | 17.22 | 4p 1F  | - | 5d 1G | 3 | - | 4 |  |
| 149.4653Cu II | 13   | 8.66 - | 16.96 | 4p 3F  | - | 5d 3P | 2 | - | 1 |  |
| 149.4791Cu II | 13   | 8.92 - | 17.21 | 4p 1F  | - | 5d 3G | 3 | - | 3 |  |
| 149.5079Cu II | 1    | 8.66 - | 16.96 | 4p 3F  | - | 5d 3P | 2 | - | 2 |  |
| 149.5430Cu II | 329  | 8.87 - | 17.16 | 4s2 3F | - | 4p 3G | 3 | - | 3 |  |
| 149.6687Cu II | 19   | 8.54 - | 16.82 | 4p 3P  | - | 6s 3D | 0 | - | 1 |  |
| 149.8417Cu II | 1    | 8.64 - | 16.92 | 4s2 3F | - | 4p 3D | 4 | - | 3 |  |
| 150.1336Cu II | 17   | 9.02 - | 17.28 | 4s2 3F | - | 6p 3F | 2 | - | 3 |  |
| 150.3368Cu II | 172  | 9.02 - | 17.26 | 4s2 3F | - | 6p 3P | 2 | - | 1 |  |
| 150.4463Cu II | 0    | 8.66 - | 16.90 | 4p 3F  | - | 5d 3S | 2 | - | 1 |  |
| 150.4757Cu II | 0    | -      |       | -      | - |       |   |   |   |  |
| 150.5388Cu II | 0    | -      |       | -      | - |       |   |   |   |  |
| 150.5857Cu II | 111  | 8.87 - | 17.10 | 4s2 3F | - | 4p 3P | 3 | - | 4 |  |
| 150.8185Cu II | 23   | 9.02 - | 17.24 | 4s2 3F | - | 4p 3D | 2 | - | 2 |  |
| 150.8632Cu II | 0    | -      |       | -      | - |       |   |   |   |  |
| 150.9840Cu II | 1    | 8.78 - | 17.00 | 4p 3D  | - | 5d 3D | 3 | - | 2 |  |
| 151.0506Cu II | 225  | 8.78 - | 16.99 | 4p 3D  | - | 5d 3F | 3 | - | 4 |  |
| 151.0727Cu II | 4    | 8.78 - | 16.99 | 4p 3D  | - | 5d 3F | 3 | - | 3 |  |
| 151.2174Cu II | 442  | 8.64 - | 16.84 | 4s2 3F | - | 4p 3F | 4 | - | 4 |  |
| 151.2465Cu II | 118  | 8.87 - | 17.07 | 4s2 3F | - | 4p 1D | 3 | - | 2 |  |
| 151.3366Cu II | 111  | 8.78 - | 16.98 | 4p 3D  | - | 5d 3D | 3 | - | 3 |  |
| 151.4234Cu II | 97   | 9.06 - | 17.25 | 4p 3D  | - | 5d 3F | 1 | - | 2 |  |
| 151.4492Cu II | 1672 | 8.64 - | 16.83 | 4s2 3F | - | 4p 3F | 4 | - | 3 |  |
| 151.6901Cu II | 25   | 8.78 - | 16.96 | 4p 3D  | - | 5d 3G | 3 | - | 4 |  |
| 151.7160Cu II | 37   | 8.78 - | 16.96 | 4p 3D  | - | 5d 3P | 3 | - | 2 |  |
| 151.7631Cu II | 10   | 8.66 - | 16.83 | 4p 3F  | - | 6s 1D | 2 | - | 2 |  |
| 151.7930Cu II | 102  | 9.06 - | 17.23 | 4p 3D  | - | 5d 1D | 1 | - | 2 |  |
| 151.9492Cu II | 27   | 8.42 - | 16.58 | 4p 3P  | - | 6s 3D | 1 | - | 2 |  |
| 151.9837Cu II | 58   | 8.66 - | 16.82 | 4p 3F  | - | 6s 3D | 2 | - | 1 |  |
| 151.9843Cu II | 49   | 9.06 - | 17.22 | 4p 3D  | - | 5d 3D | 1 | - | 1 |  |
| 152.0017Cu II | 51   | 9.09 - | 17.25 | 4p 1D  | - | 5d 3F | 2 | - | 2 |  |
| 152.0540Cu II | 302  | 9.09 - | 17.25 | 4p 1D  | - | 5d 1F | 2 | - | 3 |  |
| 152.2577Cu II | 88   | 9.02 - | 17.16 | 4s2 3F | - | 4p 3G | 2 | - | 3 |  |
| 152.3741Cu II | 110  | 9.09 - | 17.23 | 4p 1D  | - | 5d 1D | 2 | - | 2 |  |
| 152.4860Cu II | 141  | 8.86 - | 17.00 | 4p 3D  | - | 5d 3D | 2 | - | 2 |  |
| 152.5631Cu II | 78   | 8.87 - | 17.00 | 4s2 3F | - | 4p 3G | 3 | - | 3 |  |

|               |      |         |       |        |   |       |   |   |   |  |
|---------------|------|---------|-------|--------|---|-------|---|---|---|--|
| 152.5641Cu II | 64   | 9.12 -  | 17.25 | 4p 1P  | - | 5d 3F | 1 | - | 2 |  |
| 152.5764Cu II | 13   | 9.09 -  | 17.22 | 4p 1D  | - | 5d 3D | 2 | - | 1 |  |
| 152.5764Cu II | 191  | 8.86 -  | 16.99 | 4p 3D  | - | 5d 3F | 2 | - | 3 |  |
| 152.6928Cu II | 21   | 9.06 -  | 17.18 | 4p 3D  | - | 5d 1P | 1 | - | 1 |  |
| 152.7516Cu II | 3    | 9.09 -  | 17.21 | 4p 1D  | - | 5d 3G | 2 | - | 3 |  |
| 152.8456Cu II | 9    | 8.86 -  | 16.98 | 4p 3D  | - | 5d 3D | 2 | - | 3 |  |
| 152.9393Cu II | 13   | 9.12 -  | 17.23 | 4p 1P  | - | 5d 1D | 1 | - | 2 |  |
| 153.1335Cu II | 51   | 9.12 -  | 17.22 | 4p 1P  | - | 5d 3D | 1 | - | 1 |  |
| 153.1856Cu II | 100  | 8.49 -  | 16.58 | 4p 3F  | - | 6s 3D | 3 | - | 2 |  |
| 153.1879Cu II | 39   | 8.86 -  | 16.96 | 4p 3D  | - | 5d 3P | 2 | - | 1 |  |
| 153.2131Cu II | 1726 | 8.87 -  | 16.96 | 4s2 3F | - | 4p 3F | 3 | - | 2 |  |
| 153.2326Cu II | 1    | 8.86 -  | 16.96 | 4p 3D  | - | 5d 3P | 2 | - | 2 |  |
| 153.2808Cu II | 29   | 9.09 -  | 17.18 | 4p 1D  | - | 5d 1P | 2 | - | 1 |  |
| 153.3986Cu II | 1245 | 9.02 -  | 17.10 | 4s2 3F | - | 4p 3S | 2 | - | 1 |  |
| 153.4627Cu II | 16   | 8.87 -  | 16.95 | 4s2 3F | - | 4p 3G | 3 | - | 4 |  |
| 153.4836Cu II | 1    | 8.92 -  | 17.00 | 4p 1F  | - | 5d 3D | 3 | - | 2 |  |
| 153.5002Cu II | 21   | 8.49 -  | 16.56 | 4p 3F  | - | 6s 3D | 3 | - | 3 |  |
| 153.5524Cu II | 159  | 8.92 -  | 16.99 | 4p 1F  | - | 5d 3F | 3 | - | 4 |  |
| 153.5752Cu II | 3    | 8.92 -  | 16.99 | 4p 1F  | - | 5d 3F | 3 | - | 3 |  |
| 153.7559Cu II | 4765 | 8.64 -  | 16.71 | 4s2 3F | - | 4p 3H | 4 | - | 4 |  |
| 153.8480Cu II | 141  | 8.92 -  | 16.98 | 4p 1F  | - | 5d 3D | 3 | - | 3 |  |
| 153.8527Cu II | 37   | 9.12 -  | 17.18 | 4p 1P  | - | 5d 1P | 1 | - | 1 |  |
| 154.0239Cu II | 451  | 9.02 -  | 17.07 | 4s2 3F | - | 4p 1D | 2 | - | 2 |  |
| 154.0389Cu II | 62   | 8.78 -  | 16.83 | 4p 3D  | - | 6s 1D | 3 | - | 2 |  |
| 154.0588Cu II | 3098 | 8.87 -  | 16.92 | 4s2 3F | - | 4p 3D | 3 | - | 3 |  |
| 154.1703Cu II | 160  | 8.52 -  | 16.56 | 4p 3F  | - | 6s 3D | 4 | - | 3 |  |
| 154.1756Cu II | 3266 | 10.59 - | 18.63 | 4s2 1D | - | 4p 3F | 2 | - | 2 |  |
| 154.2133Cu II | 2    | 8.92 -  | 16.96 | 4p 1F  | - | 5d 3G | 3 | - | 4 |  |
| 154.2186Cu II | 1    | 8.86 -  | 16.90 | 4p 3D  | - | 5d 3S | 2 | - | 1 |  |
| 154.2401Cu II | 53   | 8.92 -  | 16.96 | 4p 1F  | - | 5d 3P | 3 | - | 2 |  |
| 154.4677Cu II | 0    | -       | -     | -      | - | -     | - | - | - |  |
| 154.7958Cu II | 0    | -       | -     | -      | - | -     | - | - | - |  |
| 155.0097Cu II | 11   | 9.06 -  | 17.06 | 4p 3D  | - | 5d 3P | 1 | - | 0 |  |
| 155.0653Cu II | 1    | 9.02 -  | 17.01 | 4s2 3F | - | 4p 1P | 2 | - | 1 |  |
| 155.1389Cu II | 0    | -       | -     | -      | - | -     | - | - | - |  |
| 155.2296Cu II | 1    | 8.87 -  | 16.86 | 4s2 3F | - | 4p 5S | 3 | - | 2 |  |
| 155.2646Cu II | 8073 | 8.64 -  | 16.63 | 4s2 3F | - | 4p 3H | 4 | - | 5 |  |
| 155.3896Cu II | 4093 | 9.02 -  | 17.00 | 4s2 3F | - | 4p 3G | 2 | - | 3 |  |
| 155.5134Cu II | 5396 | 8.87 -  | 16.84 | 4s2 3F | - | 4p 3F | 3 | - | 4 |  |
| 155.5703Cu II | 2153 | 8.64 -  | 16.61 | 4s2 3F | - | 4p 3D | 4 | - | 3 |  |
| 155.6026Cu II | 5    | 8.86 -  | 16.83 | 4p 3D  | - | 6s 1D | 2 | - | 2 |  |
| 155.7587Cu II | 5    | 8.87 -  | 16.83 | 4s2 3F | - | 4p 3F | 3 | - | 3 |  |

|                |     |        |       |        |   |       |   |   |   |
|----------------|-----|--------|-------|--------|---|-------|---|---|---|
| 155.8345 Cu II | 18  | 8.86 - | 16.82 | 4p 3D  | - | 6s 3D | 2 | - | 1 |
| 156.0639 Cu II | 47  | 9.02 - | 16.96 | 4s2 3F | - | 4p 3F | 2 | - | 2 |
| 156.2053 Cu II | 2   | 9.12 - | 17.06 | 4p 1P  | - | 5d 3P | 1 | - | 0 |
| 156.3194 Cu II | 14  | 9.06 - | 17.00 | 4p 3D  | - | 5d 3D | 1 | - | 2 |
| 156.5924 Cu II | 21  | 8.66 - | 16.58 | 4p 3F  | - | 6s 3D | 2 | - | 2 |
| 156.6415 Cu II | 58  | 8.92 - | 16.83 | 4p 1F  | - | 6s 1D | 3 | - | 2 |
| 156.9212 Cu II | 1   | 8.66 - | 16.56 | 4p 3F  | - | 6s 3D | 2 | - | 3 |
| 156.9416 Cu II | 1   | 9.09 - | 17.00 | 4p 1D  | - | 5d 3D | 2 | - | 2 |
| 156.9416 Cu II | 643 | 9.02 - | 16.92 | 4s2 3F | - | 4p 3D | 2 | - | 3 |
| 157.0315 Cu II | 1   | 9.09 - | 16.99 | 4p 1D  | - | 5d 3F | 2 | - | 3 |
| 157.0571 Cu II | 17  | 9.06 - | 16.96 | 4p 3D  | - | 5d 3P | 1 | - | 1 |
| 157.1041 Cu II | 1   | 9.06 - | 16.96 | 4p 3D  | - | 5d 3P | 1 | - | 2 |
| 157.3167 Cu II | 4   | 9.09 - | 16.98 | 4p 1D  | - | 5d 3D | 2 | - | 3 |
| 157.5353 Cu II | 35  | 9.12 - | 17.00 | 4p 1P  | - | 5d 3D | 1 | - | 2 |
| 157.6793 Cu II | 1   | 9.09 - | 16.96 | 4p 1D  | - | 5d 3P | 2 | - | 1 |
| 157.7267 Cu II | 7   | 9.09 - | 16.96 | 4p 1D  | - | 5d 3P | 2 | - | 2 |
| 157.9492 Cu II | 0   | -      |       | -      |   | -     |   |   |   |
| 158.0626 Cu II | 0   | -      |       | -      |   | -     |   |   |   |
| 158.1407 Cu II | 3   | 9.06 - | 16.90 | 4p 3D  | - | 5d 3S | 1 | - | 1 |
| 158.1567 Cu II | 1   | 9.02 - | 16.86 | 4s2 3F | - | 4p 5S | 2 | - | 2 |
| 158.1995 Cu II | 929 | 8.87 - | 16.71 | 4s2 3F | - | 4p 3H | 3 | - | 4 |
| 158.2846 Cu II | 44  | 9.12 - | 16.96 | 4p 1P  | - | 5d 3P | 1 | - | 1 |
| 158.3324 Cu II | 1   | 9.12 - | 16.96 | 4p 1P  | - | 5d 3P | 1 | - | 2 |
| 158.3682 Cu II | 313 | 8.87 - | 16.70 | 4s2 3F | - | 4p 3D | 3 | - | 2 |
| 158.7060 Cu II | 3   | 9.02 - | 16.83 | 4s2 3F | - | 4p 3F | 2 | - | 3 |
| 158.7715 Cu II | 5   | 9.09 - | 16.90 | 4p 1D  | - | 5d 3S | 2 | - | 1 |
| 159.0165 Cu II | 21  | 8.78 - | 16.58 | 4p 3D  | - | 6s 3D | 3 | - | 2 |
| 159.3556 Cu II | 41  | 8.78 - | 16.56 | 4p 3D  | - | 6s 3D | 3 | - | 3 |
| 159.3852 Cu II | 7   | 9.12 - | 16.90 | 4p 1P  | - | 5d 3S | 1 | - | 1 |
| 159.5963 Cu II | 1   | 9.06 - | 16.83 | 4p 3D  | - | 6s 1D | 1 | - | 2 |
| 159.8402 Cu II | 42  | 9.06 - | 16.82 | 4p 3D  | - | 6s 3D | 1 | - | 1 |
| 160.1210 Cu II | 14  | 8.87 - | 16.61 | 4s2 3F | - | 4p 3D | 3 | - | 3 |
| 160.2273 Cu II | 63  | 9.02 - | 16.75 | 4s2 3F | - | 4p 3D | 2 | - | 1 |
| 160.2388 Cu II | 69  | 9.09 - | 16.83 | 4p 1D  | - | 6s 1D | 2 | - | 2 |
| 160.4848 Cu II | 14  | 9.09 - | 16.82 | 4p 1D  | - | 6s 3D | 2 | - | 1 |
| 160.5281 Cu II | 321 | 8.87 - | 16.59 | 4s2 3F | - | 4p 3P | 3 | - | 2 |
| 160.6834 Cu II | 62  | 8.86 - | 16.58 | 4p 3D  | - | 6s 3D | 2 | - | 2 |
| 160.8639 Cu II | 33  | 9.12 - | 16.83 | 4p 1P  | - | 6s 1D | 1 | - | 2 |
| 161.0296 Cu II | 2   | 8.86 - | 16.56 | 4p 3D  | - | 6s 3D | 2 | - | 3 |
| 161.1118 Cu II | 2   | 9.12 - | 16.82 | 4p 1P  | - | 6s 3D | 1 | - | 1 |
| 161.4161 Cu II | 7   | 9.02 - | 16.70 | 4s2 3F | - | 4p 3D | 2 | - | 2 |

|               |     |       |   |       |        |   |       |   |   |   |
|---------------|-----|-------|---|-------|--------|---|-------|---|---|---|
| 161.5825Cu II | 162 | 10.96 | - | 18.63 | 4s2 3P | - | 4p 3F | 2 | - | 2 |
| 161.7915Cu II | 4   | 8.92  | - | 16.58 | 4p 1F  | - | 6s 3D | 3 | - | 2 |
| 162.1426Cu II | 59  | 8.92  | - | 16.56 | 4p 1F  | - | 6s 3D | 3 | - | 3 |
| 162.2197Cu II | 164 | 10.99 | - | 18.63 | 4s2 3P | - | 4p 3F | 1 | - | 2 |
| 162.2428Cu II | 249 | 9.02  | - | 16.66 | 4s2 3F | - | 4p 3P | 2 | - | 1 |
| 162.3173Cu II | 23  | 8.64  | - | 16.28 | 4s2 3F | - | 4p 5D | 4 | - | 3 |
| 163.0268Cu II | 0   | -     |   | -     |        |   | -     |   |   |   |
| 163.2373Cu II | 1   | 9.02  | - | 16.61 | 4s2 3F | - | 4p 3D | 2 | - | 3 |
| 163.6605Cu II | 19  | 9.02  | - | 16.59 | 4s2 3F | - | 4p 3P | 2 | - | 2 |
| 164.9458Cu II | 9   | 9.06  | - | 16.58 | 4p 3D  | - | 6s 3D | 1 | - | 2 |
| 165.6322Cu II | 0   | 9.09  | - | 16.58 | 4p 1D  | - | 6s 3D | 2 | - | 2 |
| 166.0001Cu II | 4   | 9.09  | - | 16.56 | 4p 1D  | - | 6s 3D | 2 | - | 3 |
| 166.3002Cu II | 17  | 9.12  | - | 16.58 | 4p 1P  | - | 6s 3D | 1 | - | 2 |
| 167.2776Cu II | 1   | 8.87  | - | 16.28 | 4s2 3F | - | 4p 5D | 3 | - | 3 |
| 168.3155Cu II | 516 | 8.64  | - | 16.01 | 4s2 3F | - | 4p 3D | 4 | - | 3 |
| 168.3159Cu II | 14  | 8.87  | - | 16.24 | 4s2 3F | - | 4p 5D | 3 | - | 2 |
| 169.2811Cu II | 2   | 8.64  | - | 15.97 | 4s2 3F | - | 4p 3F | 4 | - | 4 |
| 169.9095Cu II | 16  | 8.87  | - | 16.17 | 4s2 3F | - | 4p 3P | 3 | - | 2 |
| 169.9102Cu II | 31  | 8.64  | - | 15.94 | 4s2 3F | - | 4p 3F | 4 | - | 3 |
| 170.6817Cu II | 1   | 9.02  | - | 16.28 | 4s2 3F | - | 4p 5D | 2 | - | 3 |
| 171.7721Cu II | 1   | 9.02  | - | 16.24 | 4s2 3F | - | 4p 5D | 2 | - | 2 |
| 171.7721Cu II | 4   | 9.02  | - | 16.23 | 4s2 3F | - | 4p 5D | 2 | - | 1 |
| 173.4227Cu II | 2   | 9.02  | - | 16.17 | 4s2 3F | - | 4p 3P | 2 | - | 2 |
| 173.6551Cu II | 36  | 8.87  | - | 16.01 | 4s2 3F | - | 4p 3D | 3 | - | 3 |
| 174.4516Cu II | 173 | 8.87  | - | 15.98 | 4s2 3F | - | 4p 3D | 3 | - | 2 |
| 174.6832Cu II | 1   | 8.87  | - | 15.97 | 4s2 3F | - | 4p 3F | 3 | - | 4 |
| 175.3281Cu II | 27  | 8.87  | - | 15.94 | 4s2 3F | - | 4p 3D | 3 | - | 2 |
| 175.3281Cu II | 28  | 9.02  | - | 16.09 | 4s2 3F | - | 4p 3P | 2 | - | 1 |
| 175.3532Cu II | 1   | 8.87  | - | 15.94 | 4s2 3F | - | 4p 3F | 3 | - | 3 |
| 177.3266Cu II | 2   | 9.02  | - | 16.01 | 4s2 3F | - | 4p 3D | 2 | - | 3 |
| 177.4768Cu II | 2   | 10.59 | - | 17.57 | 4s2 1D | - | 6p 3F | 2 | - | 2 |
| 178.0842Cu II | 10  | 10.59 | - | 17.55 | 4s2 1D | - | 6p 1D | 2 | - | 2 |
| 178.1572Cu II | 20  | 9.02  | - | 15.98 | 4s2 3F | - | 4p 3D | 2 | - | 2 |
| 179.0324Cu II | 1   | 10.59 | - | 17.51 | 4s2 1D | - | 6p 3D | 2 | - | 1 |
| 179.0660Cu II | 1   | 9.02  | - | 15.94 | 4s2 3F | - | 4p 3D | 2 | - | 2 |
| 179.0976Cu II | 1   | 9.02  | - | 15.94 | 4s2 3F | - | 4p 3F | 2 | - | 3 |
| 179.1670Cu II | 3   | 10.59 | - | 17.51 | 4s2 1D | - | 6p 1F | 2 | - | 3 |
| 179.8796Cu II | 3   | 10.59 | - | 17.48 | 4s2 1D | - | 6p 1P | 2 | - | 1 |
| 180.0978Cu II | 23  | 8.64  | - | 15.53 | 4s2 3F | - | 4p 5P | 4 | - | 3 |
| 183.4883Cu II | 1   | 8.42  | - | 15.18 | 4p 3P  | - | 4d 1S | 1 | - | 0 |
| 183.9848Cu II | 3   | 10.59 | - | 17.33 | 4s2 1D | - | 6p 3D | 2 | - | 3 |
| 184.0884Cu II | 1   | 10.59 | - | 17.32 | 4s2 1D | - | 6p 3D | 2 | - | 2 |

|               |    |        |       |        |        |       |       |   |   |   |
|---------------|----|--------|-------|--------|--------|-------|-------|---|---|---|
| 185.3830Cu II | 1  | 10.59  | -     | 17.28  | 4s2 1D | -     | 6p 3F | 2 | - | 3 |
| 185.6929Cu II | 20 | 10.59  | -     | 17.26  | 4s2 1D | -     | 6p 3P | 2 | - | 1 |
| 186.1623Cu II | 6  | 8.87 - | 15.53 | 4s2 3F | -      | 4p 5P | 3     | - | 2 |   |
| 186.2248Cu II | 2  | 8.87 - | 15.53 | 4s2 3F | -      | 4p 5P | 3     | - | 3 |   |
| 186.4283Cu II | 23 | 10.59  | -     | 17.24  | 4s2 1D | -     | 4p 3D | 2 | - | 2 |
| 187.5746Cu II | 3  | 8.64 - | 15.25 | 4s2 3F | -      | 5p 1F | 4     | - | 3 |   |
| 188.0406Cu II | 4  | 10.96  | -     | 17.55  | 4s2 3P | -     | 6p 1D | 2 | - | 2 |
| 188.2208Cu II | 0  | 10.99  | -     | 17.57  | 4s2 3P | -     | 6p 3F | 1 | - | 2 |
| 188.6324Cu II | 2  | 10.59  | -     | 17.16  | 4s2 1D | -     | 4p 3G | 2 | - | 3 |
| 188.9041Cu II | 6  | 10.99  | -     | 17.55  | 4s2 3P | -     | 6p 1D | 1 | - | 2 |
| 189.2309Cu II | 1  | 9.02 - | 15.57 | 4s2 3F | -      | 4p 5P | 2     | - | 1 |   |
| 189.2483Cu II | 1  | 10.96  | -     | 17.51  | 4s2 3P | -     | 6p 1F | 2 | - | 3 |
| 189.9715Cu II | 1  | 10.99  | -     | 17.51  | 4s2 3P | -     | 6p 3D | 1 | - | 1 |
| 190.0436Cu II | 11 | 10.96  | -     | 17.48  | 4s2 3P | -     | 6p 1P | 2 | - | 1 |
| 190.3867Cu II | 0  | 10.59  | -     | 17.10  | 4s2 1D | -     | 4p 3S | 2 | - | 1 |
| 190.3881Cu II | 1  | 9.02 - | 15.53 | 4s2 3F | -      | 4p 5P | 2     | - | 2 |   |
| 190.4534Cu II | 0  | 9.02 - | 15.53 | 4s2 3F | -      | 4p 5P | 2     | - | 3 |   |
| 190.9256Cu II | 3  | 10.99  | -     | 17.48  | 4s2 3P | -     | 6p 1P | 1 | - | 1 |
| 191.1367Cu II | 5  | 11.03  | -     | 17.51  | 4s2 3P | -     | 6p 3D | 0 | - | 1 |
| 191.3509Cu II | 4  | 10.59  | -     | 17.07  | 4s2 1D | -     | 4p 1D | 2 | - | 2 |
| 191.8899Cu II | 9  | 8.23 - | 14.70 | 4p 3P  | -      | 4d 3F | 2     | - | 2 |   |
| 192.0672Cu II | 73 | 8.23 - | 14.69 | 4p 3P  | -      | 4d 1F | 2     | - | 3 |   |
| 192.1026Cu II | 4  | 11.03  | -     | 17.48  | 4s2 3P | -     | 6p 1P | 0 | - | 1 |
| 192.2143Cu II | 11 | 8.87 - | 15.32 | 4s2 3F | -      | 5p 1D | 3     | - | 2 |   |
| 192.9608Cu II | 28 | 10.59  | -     | 17.01  | 4s2 1D | -     | 4p 1P | 2 | - | 1 |
| 192.9751Cu II | 44 | 8.64 - | 15.07 | 4s2 3F | -      | 5p 3D | 4     | - | 3 |   |
| 193.2570Cu II | 14 | 8.23 - | 14.65 | 4p 3P  | -      | 4d 1D | 2     | - | 2 |   |
| 193.4632Cu II | 1  | 10.59  | -     | 17.00  | 4s2 1D | -     | 4p 3G | 2 | - | 3 |
| 194.1389Cu II | 3  | 8.23 - | 14.62 | 4p 3P  | -      | 4d 3D | 2     | - | 1 |   |
| 194.2303Cu II | 2  | 8.87 - | 15.25 | 4s2 3F | -      | 5p 1F | 3     | - | 3 |   |
| 194.4597Cu II | 77 | 2.72 - | 9.09  | 4s 3D  | -      | 4p 1D | 3     | - | 2 |   |
| 194.5095Cu II | 4  | 10.59  | -     | 16.96  | 4s2 1D | -     | 4p 3F | 2 | - | 2 |
| 194.6317Cu II | 3  | 10.96  | -     | 17.33  | 4s2 3P | -     | 6p 3D | 2 | - | 3 |
| 194.6493Cu II | 1  | 8.64 - | 15.01 | 4s2 3F | -      | 4p 1F | 4     | - | 3 |   |
| 194.7477Cu II | 3  | 10.96  | -     | 17.32  | 4s2 3P | -     | 6p 3D | 2 | - | 2 |
| 194.8230Cu II | 2  | 8.23 - | 14.60 | 4p 3P  | -      | 4d 3G | 2     | - | 3 |   |
| 195.2576Cu II | 4  | 8.87 - | 15.22 | 4s2 3F | -      | 5p 3F | 3     | - | 2 |   |
| 195.6740Cu II | 2  | 10.99  | -     | 17.32  | 4s2 3P | -     | 6p 3D | 1 | - | 2 |
| 195.7518Cu II | 7  | 8.64 - | 14.98 | 4s2 3F | -      | 5p 3F | 4     | - | 4 |   |
| 195.8747Cu II | 2  | 10.59  | -     | 16.92  | 4s2 1D | -     | 4p 3D | 2 | - | 3 |
| 196.1553Cu II | 1  | 8.64 - | 14.96 | 4s2 3F | -      | 5p 3F | 4     | - | 3 |   |
| 196.1971Cu II | 4  | 10.96  | -     | 17.28  | 4s2 3P | -     | 6p 3F | 2 | - | 3 |

|               |      |       |   |       |        |   |       |   |   |   |
|---------------|------|-------|---|-------|--------|---|-------|---|---|---|
| 196.5443Cu II | 1    | 10.96 | - | 17.26 | 4s2 3P | - | 6p 3P | 2 | - | 1 |
| 196.8012Cu II | 37   | 8.23  | - | 14.53 | 4p 3P  | - | 4d 1P | 2 | - | 1 |
| 197.0495Cu II | 11   | 2.83  | - | 9.12  | 4s 3D  | - | 4p 1P | 2 | - | 1 |
| 197.3683Cu II | 8    | 10.96 | - | 17.24 | 4s2 3P | - | 4p 3D | 2 | - | 2 |
| 197.4878Cu II | 8    | 10.99 | - | 17.26 | 4s2 3P | - | 6p 3P | 1 | - | 1 |
| 197.5686Cu II | 4    | 8.42  | - | 14.70 | 4p 3P  | - | 4d 3F | 1 | - | 2 |
| 197.7027Cu II | 9    | 9.02  | - | 15.29 | 4s2 3F | - | 5p 3D | 2 | - | 1 |
| 197.7712Cu II | 1    | 10.59 | - | 16.86 | 4s2 1D | - | 4p 5S | 2 | - | 2 |
| 197.9956Cu II | 320  | 2.83  | - | 9.09  | 4s 3D  | - | 4p 1D | 2 | - | 2 |
| 198.2149Cu II | 2    | 8.87  | - | 15.12 | 4s2 3F | - | 5p 3D | 3 | - | 2 |
| 198.3198Cu II | 5    | 10.99 | - | 17.24 | 4s2 3P | - | 4p 3D | 1 | - | 2 |
| 198.6308Cu II | 24   | 10.59 | - | 16.83 | 4s2 1D | - | 4p 3F | 2 | - | 3 |
| 198.7474Cu II | 0    | 11.03 | - | 17.26 | 4s2 3P | - | 6p 3P | 0 | - | 1 |
| 198.9855Cu II | 178  | 2.83  | - | 9.06  | 4s 3D  | - | 4p 3D | 2 | - | 1 |
| 199.0180Cu II | 497  | 8.42  | - | 14.65 | 4p 3P  | - | 4d 1D | 1 | - | 2 |
| 199.4260Cu II | 1    | 9.02  | - | 15.23 | 4s2 3F | - | 5p 1P | 2 | - | 1 |
| 199.6639Cu II | 8    | 8.49  | - | 14.70 | 4p 3F  | - | 4d 3F | 3 | - | 2 |
| 199.8403Cu II | 1    | 10.96 | - | 17.16 | 4s2 3P | - | 4p 3G | 2 | - | 3 |
| 199.8559Cu II | 74   | 8.49  | - | 14.69 | 4p 3F  | - | 4d 1F | 3 | - | 3 |
| 199.9116Cu II | 1    | 9.02  | - | 15.22 | 4s2 3F | - | 5p 3F | 2 | - | 2 |
| 199.9534Cu II | 95   | 8.42  | - | 14.62 | 4p 3P  | - | 4d 3D | 1 | - | 1 |
| 199.9698Cu II | 1    | 8.87  | - | 15.07 | 4s2 3F | - | 5p 3D | 3 | - | 3 |
| 199.9698Cu II | 1189 | 2.72  | - | 8.92  | 4s 3D  | - | 4p 1F | 3 | - | 3 |
| 200.0589Cu II | 7    | 8.23  | - | 14.43 | 4p 3P  | - | 4d 3D | 2 | - | 2 |
| 200.3070Cu II | 3    | 8.23  | - | 14.42 | 4p 3P  | - | 4d 3F | 2 | - | 3 |
| 200.9283Cu II | 3    | 8.52  | - | 14.69 | 4p 3F  | - | 4d 1F | 4 | - | 3 |
| 200.9547Cu II | 7    | 10.59 | - | 16.75 | 4s2 1D | - | 4p 3D | 2 | - | 1 |
| 201.0795Cu II | 0    | 8.49  | - | 14.65 | 4p 3F  | - | 4d 1D | 3 | - | 2 |
| 201.2981Cu II | 1211 | 8.23  | - | 14.39 | 4p 3P  | - | 4d 3D | 2 | - | 3 |
| 201.5583Cu II | 31   | 2.98  | - | 9.12  | 4s 3D  | - | 4p 1P | 1 | - | 1 |
| 201.6898Cu II | 39   | 2.72  | - | 8.86  | 4s 3D  | - | 4p 3D | 3 | - | 2 |
| 201.7454Cu II | 1    | 10.96 | - | 17.10 | 4s2 3P | - | 4p 3S | 2 | - | 1 |
| 201.7610Cu II | 3    | 8.87  | - | 15.01 | 4s2 3F | - | 4p 1F | 3 | - | 3 |
| 202.2192Cu II | 116  | 8.49  | - | 14.62 | 4p 3F  | - | 4d 1G | 3 | - | 4 |
| 202.5488Cu II | 260  | 2.98  | - | 9.09  | 4s 3D  | - | 4p 1D | 1 | - | 2 |
| 202.5917Cu II | 5    | 8.87  | - | 14.99 | 4s2 3F | - | 4p 1D | 3 | - | 2 |
| 202.7134Cu II | 400  | 8.42  | - | 14.53 | 4p 3P  | - | 4d 1P | 1 | - | 1 |
| 202.7172Cu II | 18   | 9.06  | - | 15.18 | 4p 3D  | - | 4d 1S | 1 | - | 0 |
| 202.7401Cu II | 15   | 10.99 | - | 17.10 | 4s2 3P | - | 4p 3S | 1 | - | 1 |
| 202.7761Cu II | 31   | 8.49  | - | 14.60 | 4p 3F  | - | 4d 3G | 3 | - | 3 |
| 202.8288Cu II | 3    | 10.96 | - | 17.07 | 4s2 3P | - | 4p 1D | 2 | - | 2 |

|               |      |       |   |       |        |   |       |   |   |   |
|---------------|------|-------|---|-------|--------|---|-------|---|---|---|
| 202.8290Cu II | 2    | 10.59 | - | 16.70 | 4s2 1D | - | 4p 3D | 2 | - | 2 |
| 202.8295Cu II | 0    | 8.64  | - | 14.75 | 4s2 3F | - | 4p 1G | 4 | - | 4 |
| 202.9463Cu II | 0    | 8.87  | - | 14.98 | 4s2 3F | - | 5p 3F | 3 | - | 4 |
| 202.9473Cu II | 7    | 9.02  | - | 15.12 | 4s2 3F | - | 5p 3D | 2 | - | 2 |
| 202.9949Cu II | 227  | 8.23  | - | 14.34 | 4p 3P  | - | 4d 3P | 2 | - | 1 |
| 203.1036Cu II | 1863 | 8.23  | - | 14.34 | 4p 3P  | - | 4d 3P | 2 | - | 2 |
| 203.3803Cu II | 2    | 8.87  | - | 14.96 | 4s2 3F | - | 5p 3F | 3 | - | 3 |
| 203.3843Cu II | 71   | 8.52  | - | 14.62 | 4p 3F  | - | 4d 1G | 4 | - | 4 |
| 203.5854Cu II | 821  | 2.98  | - | 9.06  | 4s 3D  | - | 4p 3D | 1 | - | 1 |
| 203.6920Cu II | 499  | 8.54  | - | 14.62 | 4p 3P  | - | 4d 3D | 0 | - | 1 |
| 203.7127Cu II | 575  | 2.83  | - | 8.92  | 4s 3D  | - | 4p 1F | 2 | - | 3 |
| 203.8343Cu II | 13   | 10.99 | - | 17.07 | 4s2 3P | - | 4p 1D | 1 | - | 2 |
| 203.9477Cu II | 3    | 8.52  | - | 14.60 | 4p 3F  | - | 4d 3G | 4 | - | 3 |
| 204.0684Cu II | 27   | 11.03 | - | 17.10 | 4s2 3P | - | 4p 3S | 0 | - | 1 |
| 204.1366Cu II | 5    | 10.59 | - | 16.66 | 4s2 1D | - | 4p 3P | 2 | - | 1 |
| 204.3802Cu II | 788  | 2.72  | - | 8.78  | 4s 3D  | - | 4p 3D | 3 | - | 3 |
| 204.6394Cu II | 11   | 10.96 | - | 17.01 | 4s2 3P | - | 4p 1P | 2 | - | 1 |
| 204.7678Cu II | 551  | 9.12  | - | 15.18 | 4p 1P  | - | 4d 1S | 1 | - | 0 |
| 204.8480Cu II | 1    | 9.02  | - | 15.07 | 4s2 3F | - | 5p 3D | 2 | - | 3 |
| 205.2048Cu II | 1    | 10.96 | - | 17.00 | 4s2 3P | - | 4p 3G | 2 | - | 3 |
| 205.4253Cu II | 607  | 8.66  | - | 14.70 | 4p 3F  | - | 4d 3F | 2 | - | 2 |
| 205.4418Cu II | 479  | 8.42  | - | 14.45 | 4p 3P  | - | 4d 3P | 1 | - | 0 |
| 205.4980Cu II | 666  | 2.83  | - | 8.86  | 4s 3D  | - | 4p 3D | 2 | - | 2 |
| 205.6285Cu II | 11   | 8.66  | - | 14.69 | 4p 3F  | - | 4d 1F | 2 | - | 3 |
| 205.6630Cu II | 2    | 10.99 | - | 17.01 | 4s2 3P | - | 4p 1P | 1 | - | 1 |
| 205.7143Cu II | 5    | 10.59 | - | 16.61 | 4s2 1D | - | 4p 3D | 2 | - | 3 |
| 205.8614Cu II | 1    | 8.87  | - | 14.89 | 4s2 3F | - | 5p 3P | 3 | - | 2 |
| 206.2420Cu II | 624  | 8.42  | - | 14.43 | 4p 3P  | - | 4d 3D | 1 | - | 2 |
| 206.3825Cu II | 2    | 8.64  | - | 14.65 | 4s2 3F | - | 4p 3F | 4 | - | 3 |
| 206.3830Cu II | 5    | 10.96 | - | 16.96 | 4s2 3P | - | 4p 3F | 2 | - | 2 |
| 206.3872Cu II | 8    | 10.59 | - | 16.59 | 4s2 1D | - | 4p 3P | 2 | - | 2 |
| 206.6261Cu II | 415  | 8.54  | - | 14.53 | 4p 3P  | - | 4d 1P | 0 | - | 1 |
| 206.7364Cu II | 2    | 9.02  | - | 15.01 | 4s2 3F | - | 4p 1F | 2 | - | 3 |
| 206.9935Cu II | 97   | 8.66  | - | 14.65 | 4p 3F  | - | 4d 1D | 2 | - | 2 |
| 207.0300Cu II | 0    | 11.03 | - | 17.01 | 4s2 3P | - | 4p 1P | 0 | - | 1 |
| 207.4210Cu II | 1    | 9.02  | - | 14.99 | 4s2 3F | - | 5p 3P | 2 | - | 1 |
| 207.4241Cu II | 40   | 10.99 | - | 16.96 | 4s2 3P | - | 4p 3F | 1 | - | 2 |
| 207.8663Cu II | 1325 | 8.23  | - | 14.20 | 4p 3P  | - | 4d 3S | 2 | - | 1 |
| 207.9213Cu II | 4    | 10.96 | - | 16.92 | 4s2 3P | - | 4p 3D | 2 | - | 3 |
| 208.0060Cu II | 98   | 8.66  | - | 14.62 | 4p 3F  | - | 4d 3D | 2 | - | 1 |
| 208.2916Cu II | 1    | 2.83  | - | 8.78  | 4s 3D  | - | 4p 3D | 2 | - | 3 |
| 208.4324Cu II | 6    | 8.64  | - | 14.59 | 4s2 3F | - | 4p 3F | 4 | - | 4 |



|                |      |        |       |        |        |       |       |   |   |   |
|----------------|------|--------|-------|--------|--------|-------|-------|---|---|---|
| 208.5275 Cu II | 226  | 8.49 - | 14.43 | 4p 3F  | -      | 4d 3D | 3     | - | 2 |   |
| 208.5311 Cu II | 19   | 2.72 - | 8.66  | 4s 3D  | -      | 4p 3F | 3     | - | 2 |   |
| 208.5998 Cu II | 2    | 8.49 - | 14.43 | 4p 3F  | -      | 4d 3F | 3     | - | 4 |   |
| 208.7919 Cu II | 2124 | 8.66 - | 14.60 | 4p 3F  | -      | 4d 3G | 2     | - | 3 |   |
| 208.7971 Cu II | 1325 | 8.49 - | 14.42 | 4p 3F  | -      | 4d 3F | 3     | - | 3 |   |
| 209.3637 Cu II | 425  | 8.42 - | 14.34 | 4p 3P  | -      | 4d 3P | 1     | - | 1 |   |
| 209.4793 Cu II | 57   | 8.42 - | 14.34 | 4p 3P  | -      | 4d 3P | 1     | - | 2 |   |
| 209.6191 Cu II | 64   | 8.78 - | 14.70 | 4p 3D  | -      | 4d 3F | 3     | - | 2 |   |
| 209.8398 Cu II | 652  | 8.78 - | 14.69 | 4p 3D  | -      | 4d 1F | 3     | - | 3 |   |
| 209.8398 Cu II | 1532 | 8.52 - | 14.43 | 4p 3F  | -      | 4d 3F | 4     | - | 4 |   |
| 209.8742 Cu II | 67   | 8.49 - | 14.39 | 4p 3F  | -      | 4d 3D | 3     | - | 3 |   |
| 210.0394 Cu II | 34   | 8.52 - | 14.42 | 4p 3F  | -      | 4d 3F | 4     | - | 3 |   |
| 210.0603 Cu II | 1    | 10.96  | -     | 16.86  | 4s2 3P | -     | 4p 5S | 2 | - | 2 |
| 210.4237 Cu II | 2    | 8.87 - | 14.76 | 4s2 3F | -      | 4p 3F | 3     | - | 2 |   |
| 210.4797 Cu II | 330  | 2.98 - | 8.86  | 4s 3D  | -      | 4p 3D | 1     | - | 2 |   |
| 210.6379 Cu II | 5    | 8.87 - | 14.75 | 4s2 3F | -      | 4p 1G | 3     | - | 4 |   |
| 211.0309 Cu II | 53   | 10.96  | -     | 16.83  | 4s2 3P | -     | 4p 3F | 2 | - | 3 |
| 211.0436 Cu II | 0    | 9.02 - | 14.89 | 4s2 3F | -      | 5p 3P | 2     | - | 2 |   |
| 211.0666 Cu II | 2    | 8.66 - | 14.53 | 4p 3F  | -      | 4d 1P | 2     | - | 1 |   |
| 211.1294 Cu II | 307  | 8.52 - | 14.39 | 4p 3F  | -      | 4d 3D | 4     | - | 3 |   |
| 211.1390 Cu II | 0    | 10.99  | -     | 16.86  | 4s2 3P | -     | 4p 5S | 1 | - | 2 |
| 211.2100 Cu II | 932  | 3.26 - | 9.12  | 4s 1D  | -      | 4p 1P | 2     | - | 1 |   |
| 211.2522 Cu II | 63   | 8.78 - | 14.65 | 4p 3D  | -      | 4d 1D | 3     | - | 2 |   |
| 211.7310 Cu II | 4529 | 8.49 - | 14.34 | 4p 3F  | -      | 4d 3G | 3     | - | 4 |   |
| 211.8375 Cu II | 77   | 8.49 - | 14.34 | 4p 3F  | -      | 4d 3P | 3     | - | 2 |   |
| 212.2980 Cu II | 994  | 3.26 - | 9.09  | 4s 1D  | -      | 4p 1D | 2     | - | 2 |   |
| 212.5106 Cu II | 1714 | 8.78 - | 14.62 | 4p 3D  | -      | 4d 1G | 3     | - | 4 |   |
| 212.5267 Cu II | 190  | 8.86 - | 14.70 | 4p 3D  | -      | 4d 3F | 2     | - | 2 |   |
| 212.6044 Cu II | 560  | 2.83 - | 8.66  | 4s 3D  | -      | 4p 3F | 2     | - | 2 |   |
| 212.7443 Cu II | 4    | 8.86 - | 14.69 | 4p 3D  | -      | 4d 1F | 2     | - | 3 |   |
| 212.9741 Cu II | 6    | 8.64 - | 14.46 | 4s2 3F | -      | 4p 3G | 4     | - | 3 |   |
| 213.0085 Cu II | 271  | 8.52 - | 14.34 | 4p 3F  | -      | 4d 3G | 4     | - | 4 |   |
| 213.1257 Cu II | 108  | 8.78 - | 14.60 | 4p 3D  | -      | 4d 3G | 3     | - | 3 |   |
| 213.2479 Cu II | 10   | 10.99  | -     | 16.80  | 4s2 3P | -     | 4p 3P | 1 | - | 0 |
| 213.4341 Cu II | 6012 | 8.52 - | 14.33 | 4p 3F  | -      | 4d 3G | 4     | - | 5 |   |
| 213.4369 Cu II | 13   | 3.26 - | 9.06  | 4s 1D  | -      | 4p 3D | 2     | - | 1 |   |
| 213.5399 Cu II | 4    | 8.54 - | 14.34 | 4p 3P  | -      | 4d 3P | 0     | - | 1 |   |
| 213.5981 Cu II | 2878 | 2.72 - | 8.52  | 4s 3D  | -      | 4p 3F | 3     | - | 4 |   |
| 213.7304 Cu II | 5    | 10.96  | -     | 16.75  | 4s2 3P | -     | 4p 3D | 2 | - | 1 |
| 214.1997 Cu II | 14   | 8.64 - | 14.43 | 4s2 3F | -      | 4p 3D | 4     | - | 3 |   |
| 214.2057 Cu II | 6    | 8.86 - | 14.65 | 4p 3D  | -      | 4d 1D | 2     | - | 2 |   |
| 214.4704 Cu II | 35   | 8.92 - | 14.70 | 4p 1F  | -      | 4d 3F | 3     | - | 2 |   |

|                |      |        |       |        |        |       |       |   |   |   |
|----------------|------|--------|-------|--------|--------|-------|-------|---|---|---|
| 214.4722 Cu II | 2    | 8.87 - | 14.65 | 4s2 3F | -      | 4p 3F | 3     | - | 3 |   |
| 214.5492 Cu II | 258  | 8.42 - | 14.20 | 4p 3P  | -      | 4d 3S | 1     | - | 1 |   |
| 214.6920 Cu II | 379  | 8.92 - | 14.69 | 4p 1F  | -      | 4d 1F | 3     | - | 3 |   |
| 214.8472 Cu II | 3    | 10.99  | -     | 16.75  | 4s2 3P | -     | 4p 3D | 1 | - | 1 |
| 214.8984 Cu II | 334  | 8.66 - | 14.43 | 4p 3F  | -      | 4d 3D | 2     | - | 2 |   |
| 214.8984 Cu II | 371  | 2.72 - | 8.49  | 4s 3D  | -      | 4p 3F | 3     | - | 3 |   |
| 215.1809 Cu II | 1236 | 8.66 - | 14.42 | 4p 3F  | -      | 4d 3F | 2     | - | 3 |   |
| 215.2901 Cu II | 10   | 8.86 - | 14.62 | 4p 3D  | -      | 4d 3D | 2     | - | 1 |   |
| 215.8412 Cu II | 2    | 9.02 - | 14.76 | 4s2 3F | -      | 4p 3F | 2     | - | 2 |   |
| 215.8519 Cu II | 3    | 10.96  | -     | 16.70  | 4s2 3P | -     | 4p 3D | 2 | - | 2 |
| 216.1320 Cu II | 1443 | 8.86 - | 14.60 | 4p 3D  | -      | 4d 3G | 2     | - | 3 |   |
| 216.1803 Cu II | 23   | 8.92 - | 14.65 | 4p 1F  | -      | 4d 1D | 3     | - | 2 |   |
| 216.3250 Cu II | 12   | 8.66 - | 14.39 | 4p 3F  | -      | 4d 3D | 2     | - | 3 |   |
| 216.3394 Cu II | 6    | 11.03  | -     | 16.75  | 4s2 3P | -     | 4p 3D | 0 | - | 1 |
| 216.6868 Cu II | 2    | 8.87 - | 14.59 | 4s2 3F | -      | 4p 3F | 3     | - | 4 |   |
| 216.9909 Cu II | 4    | 10.99  | -     | 16.70  | 4s2 3P | -     | 4p 3D | 1 | - | 2 |
| 217.3334 Cu II | 3    | 10.96  | -     | 16.66  | 4s2 3P | -     | 4p 3P | 2 | - | 1 |
| 217.4982 Cu II | 2972 | 8.92 - | 14.62 | 4p 1F  | -      | 4d 1G | 3     | - | 4 |   |
| 217.6845 Cu II | 0    | 10.59  | -     | 16.28  | 4s2 1D | -     | 4p 5D | 2 | - | 3 |
| 217.9410 Cu II | 1000 | 2.98 - | 8.66  | 4s 3D  | -      | 4p 3F | 1     | - | 2 |   |
| 218.0752 Cu II | 15   | 8.64 - | 14.33 | 4s2 3F | -      | 4p 3G | 4     | - | 5 |   |
| 218.1426 Cu II | 124  | 8.92 - | 14.60 | 4p 1F  | -      | 4d 3G | 3     | - | 3 |   |
| 218.2858 Cu II | 92   | 8.66 - | 14.34 | 4p 3F  | -      | 4d 3P | 2     | - | 1 |   |
| 218.4115 Cu II | 1    | 8.66 - | 14.34 | 4p 3F  | -      | 4d 3P | 2     | - | 2 |   |
| 218.4882 Cu II | 5    | 10.99  | -     | 16.66  | 4s2 3P | -     | 4p 3P | 1 | - | 1 |
| 218.5704 Cu II | 2    | 8.86 - | 14.53 | 4p 3D  | -      | 4d 1P | 2     | - | 1 |   |
| 218.9370 Cu II | 28   | 8.54 - | 14.20 | 4p 3P  | -      | 4d 3S | 0     | - | 1 |   |
| 218.9630 Cu II | 564  | 3.26 - | 8.92  | 4s 1D  | -      | 4p 1F | 2     | - | 3 |   |
| 219.0520 Cu II | 9    | 11.85  | -     | 17.51  | 4s2 1G | -     | 6p 1F | 4 | - | 3 |
| 219.1224 Cu II | 12   | 10.96  | -     | 16.61  | 4s2 3P | -     | 4p 3D | 2 | - | 3 |
| 219.2268 Cu II | 1649 | 2.83 - | 8.49  | 4s 3D  | -      | 4p 3F | 2     | - | 3 |   |
| 219.2355 Cu II | 6    | 8.87 - | 14.52 | 4s2 3F | -      | 4p 3D | 3     | - | 2 |   |
| 219.4469 Cu II | 0    | 10.59  | -     | 16.24  | 4s2 1D | -     | 4p 5D | 2 | - | 2 |
| 219.5683 Cu II | 2372 | 8.78 - | 14.43 | 4p 3D  | -      | 4d 3F | 3     | - | 4 |   |
| 219.7868 Cu II | 13   | 8.78 - | 14.42 | 4p 3D  | -      | 4d 3F | 3     | - | 3 |   |
| 219.8860 Cu II | 16   | 10.96  | -     | 16.59  | 4s2 3P | -     | 4p 3P | 2 | - | 2 |
| 220.0315 Cu II | 0    | 11.03  | -     | 16.66  | 4s2 3P | -     | 4p 3P | 0 | - | 1 |
| 220.0509 Cu II | 854  | 9.06 - | 14.70 | 4p 3D  | -      | 4d 3F | 1     | - | 2 |   |
| 220.1028 Cu II | 2    | 9.02 - | 14.65 | 4s2 3F | -      | 4p 3F | 2     | - | 3 |   |
| 220.4506 Cu II | 3    | 9.02 - | 14.64 | 4s2 3F | -      | 4p 3D | 2     | - | 1 |   |
| 220.9806 Cu II | 860  | 8.78 - | 14.39 | 4p 3D  | -      | 4d 3D | 3     | - | 3 |   |

|               |      |        |       |        |        |       |       |   |   |   |
|---------------|------|--------|-------|--------|--------|-------|-------|---|---|---|
| 221.0268Cu II | 579  | 3.26 - | 8.86  | 4s 1D  | -      | 4p 3D | 2     | - | 2 |   |
| 221.0681Cu II | 0    | 10.99  | -     | 16.59  | 4s2 3P | -     | 4p 3P | 1 | - | 2 |
| 221.2748Cu II | 398  | 9.09 - | 14.70 | 4p 1D  | -      | 4d 3F | 2     | - | 2 |   |
| 221.5106Cu II | 2553 | 9.09 - | 14.69 | 4p 1D  | -      | 4d 1F | 2     | - | 3 |   |
| 221.5995Cu II | 0    | 8.87 - | 14.46 | 4s2 3F | -      | 4p 3G | 3     | - | 3 |   |
| 221.8108Cu II | 756  | 2.83 - | 8.42  | 4s 3D  | -      | 4p 3P | 2     | - | 1 |   |
| 221.8512Cu II | 871  | 9.06 - | 14.65 | 4p 3D  | -      | 4d 1D | 1     | - | 2 |   |
| 222.1648Cu II | 1    | 10.59  | -     | 16.17  | 4s2 1D | -     | 4p 3P | 2 | - | 2 |
| 222.4691Cu II | 531  | 9.12 - | 14.70 | 4p 1P  | -      | 4d 3F | 1     | - | 2 |   |
| 222.6780Cu II | 1167 | 8.86 - | 14.43 | 4p 3D  | -      | 4d 3D | 2     | - | 2 |   |
| 222.8868Cu II | 307  | 2.98 - | 8.54  | 4s 3D  | -      | 4p 3P | 1     | - | 0 |   |
| 222.9266Cu II | 1    | 8.87 - | 14.43 | 4s2 3F | -      | 4p 3D | 3     | - | 3 |   |
| 222.9854Cu II | 1165 | 8.86 - | 14.42 | 4p 3D  | -      | 4d 3F | 2     | - | 3 |   |
| 223.0146Cu II | 431  | 9.06 - | 14.62 | 4p 3D  | -      | 4d 3D | 1     | - | 1 |   |
| 223.0400Cu II | 140  | 8.78 - | 14.34 | 4p 3D  | -      | 4d 3G | 3     | - | 4 |   |
| 223.0953Cu II | 947  | 9.09 - | 14.65 | 4p 1D  | -      | 4d 1D | 2     | - | 2 |   |
| 223.1583Cu II | 290  | 8.78 - | 14.34 | 4p 3D  | -      | 4d 3P | 3     | - | 2 |   |
| 223.9285Cu II | 1    | 8.66 - | 14.20 | 4p 3F  | -      | 4d 3S | 2     | - | 1 |   |
| 224.2143Cu II | 90   | 8.86 - | 14.39 | 4p 3D  | -      | 4d 3D | 2     | - | 3 |   |
| 224.2618Cu II | 1413 | 3.26 - | 8.78  | 4s 1D  | -      | 4p 3D | 2     | - | 3 |   |
| 224.2718Cu II | 109  | 9.09 - | 14.62 | 4p 1D  | -      | 4d 3D | 2     | - | 1 |   |
| 224.3094Cu II | 170  | 9.12 - | 14.65 | 4p 1P  | -      | 4d 1D | 1     | - | 2 |   |
| 224.7002Cu II | 1403 | 2.72 - | 8.23  | 4s 3D  | -      | 4p 3P | 3     | - | 2 |   |
| 224.8127Cu II | 5    | 8.92 - | 14.43 | 4p 1F  | -      | 4d 3D | 3     | - | 2 |   |
| 224.8967Cu II | 917  | 8.92 - | 14.43 | 4p 1F  | -      | 4d 3F | 3     | - | 4 |   |
| 225.1224Cu II | 2    | 9.02 - | 14.52 | 4s2 3F | -      | 4p 3D | 2     | - | 2 |   |
| 225.1260Cu II | 13   | 8.92 - | 14.42 | 4p 1F  | -      | 4d 3F | 3     | - | 3 |   |
| 225.1856Cu II | 19   | 9.09 - | 14.60 | 4p 1D  | -      | 4d 3G | 2     | - | 3 |   |
| 225.3028Cu II | 1    | 10.59  | -     | 16.09  | 4s2 1D | -     | 4p 3P | 2 | - | 1 |
| 225.4988Cu II | 382  | 9.12 - | 14.62 | 4p 1P  | -      | 4d 3D | 1     | - | 1 |   |
| 225.6855Cu II | 1    | 8.64 - | 14.13 | 4s2 3F | -      | 4p 5F | 4     | - | 3 |   |
| 226.3000Cu II | 2    | 11.85  | -     | 17.33  | 4s2 1G | -     | 6p 3D | 4 | - | 3 |
| 226.3213Cu II | 329  | 8.86 - | 14.34 | 4p 3D  | -      | 4d 3P | 2     | - | 1 |   |
| 226.3786Cu II | 1234 | 8.92 - | 14.39 | 4p 1F  | -      | 4d 3D | 3     | - | 3 |   |
| 226.4565Cu II | 3    | 8.86 - | 14.34 | 4p 3D  | -      | 4d 3P | 2     | - | 2 |   |
| 226.5365Cu II | 192  | 9.06 - | 14.53 | 4p 3D  | -      | 4d 1P | 1     | - | 1 |   |
| 227.4741Cu II | 27   | 8.23 - | 13.68 | 4p 3P  | -      | 5s 1D | 2     | - | 2 |   |
| 227.6157Cu II | 2    | 9.02 - | 14.46 | 4s2 3F | -      | 4p 3G | 2     | - | 3 |   |
| 227.6258Cu II | 141  | 2.98 - | 8.42  | 4s 3D  | -      | 4p 3P | 1     | - | 1 |   |
| 227.8338Cu II | 256  | 9.09 - | 14.53 | 4p 1D  | -      | 4d 1P | 2     | - | 1 |   |
| 228.0830Cu II | 1    | 11.85  | -     | 17.28  | 4s2 1G | -     | 6p 3F | 4 | - | 4 |
| 228.0943Cu II | 3    | 8.87 - | 14.30 | 4s2 3F | -      | 4p 3G | 3     | - | 4 |   |

|               |     |       |   |       |        |   |       |   |   |   |
|---------------|-----|-------|---|-------|--------|---|-------|---|---|---|
| 228.4199Cu II | 3   | 11.85 | - | 17.28 | 4s2 1G | - | 6p 3F | 4 | - | 3 |
| 228.5404Cu II | 2   | 8.92  | - | 14.34 | 4p 1F  | - | 4d 3G | 3 | - | 4 |
| 228.6150Cu II | 4   | 10.59 | - | 16.01 | 4s2 1D | - | 4p 3D | 2 | - | 3 |
| 228.6645Cu II | 449 | 8.92  | - | 14.34 | 4p 1F  | - | 4d 3P | 3 | - | 2 |
| 228.9417Cu II | 4   | 8.23  | - | 13.65 | 4p 3P  | - | 5s 3D | 2 | - | 1 |
| 229.0161Cu II | 0   | 9.02  | - | 14.43 | 4s2 3F | - | 4p 3D | 2 | - | 3 |
| 229.1002Cu II | 320 | 9.12  | - | 14.53 | 4p 1P  | - | 4d 1P | 1 | - | 1 |
| 229.2692Cu II | 4   | 3.26  | - | 8.66  | 4s 1D  | - | 4p 3F | 2 | - | 2 |
| 229.2970Cu II | 1   | 8.64  | - | 14.05 | 4s2 3F | - | 4p 5F | 4 | - | 4 |
| 229.4368Cu II | 99  | 2.83  | - | 8.23  | 4s 3D  | - | 4p 3P | 2 | - | 2 |
| 229.9489Cu II | 79  | 9.06  | - | 14.45 | 4p 3D  | - | 4d 3P | 1 | - | 0 |
| 229.9979Cu II | 1   | 10.59 | - | 15.98 | 4s2 1D | - | 4p 3D | 2 | - | 2 |
| 230.9519Cu II | 53  | 9.06  | - | 14.43 | 4p 3D  | - | 4d 3D | 1 | - | 2 |
| 231.5156Cu II | 1   | 10.59 | - | 15.94 | 4s2 1D | - | 4p 3D | 2 | - | 2 |
| 231.5683Cu II | 3   | 10.59 | - | 15.94 | 4s2 1D | - | 4p 3F | 2 | - | 3 |
| 232.3004Cu II | 33  | 9.09  | - | 14.43 | 4p 1D  | - | 4d 3D | 2 | - | 2 |
| 232.3928Cu II | 5   | 8.86  | - | 14.20 | 4p 3D  | - | 4d 3S | 2 | - | 1 |
| 232.5909Cu II | 1   | 9.12  | - | 14.45 | 4p 1P  | - | 4d 3P | 1 | - | 0 |
| 232.6349Cu II | 3   | 9.09  | - | 14.42 | 4p 1D  | - | 4d 3F | 2 | - | 3 |
| 232.7552Cu II | 1   | 10.96 | - | 16.28 | 4s2 3P | - | 4p 5D | 2 | - | 3 |
| 232.7567Cu II | 1   | 8.87  | - | 14.19 | 4s2 3F | - | 4p 5F | 3 | - | 2 |
| 233.3752Cu II | 8   | 11.85 | - | 17.16 | 4s2 1G | - | 4p 3G | 4 | - | 3 |
| 233.6171Cu II | 231 | 9.12  | - | 14.43 | 4p 1P  | - | 4d 3D | 1 | - | 2 |
| 233.9728Cu II | 7   | 9.09  | - | 14.39 | 4p 1D  | - | 4d 3D | 2 | - | 3 |
| 234.7710Cu II | 1   | 10.96 | - | 16.24 | 4s2 3P | - | 4p 5D | 2 | - | 2 |
| 234.7885Cu II | 0   | 10.96 | - | 16.23 | 4s2 3P | - | 4p 5D | 2 | - | 1 |
| 234.8733Cu II | 111 | 9.06  | - | 14.34 | 4p 3D  | - | 4d 3P | 1 | - | 1 |
| 235.0189Cu II | 5   | 9.06  | - | 14.34 | 4p 3D  | - | 4d 3P | 1 | - | 2 |
| 235.3944Cu II | 1   | 8.87  | - | 14.13 | 4s2 3F | - | 4p 5F | 3 | - | 3 |
| 235.5014Cu II | 131 | 8.42  | - | 13.68 | 4p 3P  | - | 5s 1D | 1 | - | 2 |
| 235.6641Cu II | 7   | 2.98  | - | 8.23  | 4s 3D  | - | 4p 3P | 1 | - | 2 |
| 235.9257Cu II | 1   | 11.85 | - | 17.10 | 4s2 1G | - | 4p 3P | 4 | - | 4 |
| 236.1191Cu II | 1   | 10.99 | - | 16.24 | 4s2 3P | - | 4p 5D | 1 | - | 2 |
| 236.1368Cu II | 0   | 10.99 | - | 16.23 | 4s2 3P | - | 4p 5D | 1 | - | 1 |
| 236.2682Cu II | 4   | 9.09  | - | 14.34 | 4p 1D  | - | 4d 3P | 2 | - | 1 |
| 236.4154Cu II | 25  | 9.09  | - | 14.34 | 4p 1D  | - | 4d 3P | 2 | - | 2 |
| 236.6979Cu II | 5   | 13.39 | - | 18.63 | 5s 3D  | - | 4p 3F | 3 | - | 2 |
| 236.9890Cu II | 159 | 3.26  | - | 8.49  | 4s 1D  | - | 4p 3F | 2 | - | 3 |
| 237.0534Cu II | 0   | 8.64  | - | 13.87 | 4s2 3F | - | 4p 5G | 4 | - | 3 |
| 237.0747Cu II | 75  | 8.42  | - | 13.65 | 4p 3P  | - | 5s 3D | 1 | - | 1 |
| 237.6303Cu II | 392 | 9.12  | - | 14.34 | 4p 1P  | - | 4d 3P | 1 | - | 1 |
| 237.7793Cu II | 6   | 9.12  | - | 14.34 | 4p 1P  | - | 4d 3P | 1 | - | 2 |

|                |     |        |         |        |   |       |   |   |   |
|----------------|-----|--------|---------|--------|---|-------|---|---|---|
| 237.8405 Cu II | 1   | 9.02 - | 14.23   | 4s2 3F | - | 4p 5F | 2 | - | 1 |
| 237.8845 Cu II | 2   | 10.96  | - 16.17 | 4s2 3P | - | 4p 3P | 2 | - | 2 |
| 237.9406 Cu II | 1   | 11.03  | - 16.23 | 4s2 3P | - | 4p 5D | 0 | - | 1 |
| 238.4859 Cu II | 12  | 8.49 - | 13.68   | 4p 3F  | - | 5s 1D | 3 | - | 2 |
| 238.4945 Cu II | 33  | 8.23 - | 13.43   | 4p 3P  | - | 5s 3D | 2 | - | 2 |
| 238.5095 Cu II | 5   | 13.43  | - 18.63 | 5s 3D  | - | 4p 3F | 2 | - | 2 |
| 239.2686 Cu II | 3   | 10.99  | - 16.17 | 4s2 3P | - | 4p 3P | 1 | - | 2 |
| 239.3261 Cu II | 0   | 8.87 - | 14.05   | 4s2 3F | - | 4p 5F | 3 | - | 4 |
| 239.4030 Cu II | 1   | 9.02 - | 14.19   | 4s2 3F | - | 4p 5F | 2 | - | 2 |
| 240.0115 Cu II | 24  | 3.26 - | 8.42    | 4s 1D  | - | 4p 3P | 2 | - | 1 |
| 240.3337 Cu II | 723 | 8.23 - | 13.39   | 4p 3P  | - | 5s 3D | 2 | - | 3 |
| 240.7927 Cu II | 2   | 11.85  | - 17.00 | 4s2 1G | - | 4p 3G | 4 | - | 5 |
| 241.4189 Cu II | 8   | 9.06 - | 14.20   | 4p 3D  | - | 4d 3S | 1 | - | 1 |
| 241.4857 Cu II | 0   | 10.96  | - 16.09 | 4s2 3P | - | 4p 3P | 2 | - | 1 |
| 242.1943 Cu II | 0   | 9.02 - | 14.13   | 4s2 3F | - | 4p 5F | 2 | - | 3 |
| 242.4435 Cu II | 156 | 8.54 - | 13.65   | 4p 3P  | - | 5s 3D | 0 | - | 1 |
| 242.8928 Cu II | 15  | 9.09 - | 14.20   | 4p 1D  | - | 4d 3S | 2 | - | 1 |
| 242.9122 Cu II | 1   | 10.99  | - 16.09 | 4s2 3P | - | 4p 3P | 1 | - | 1 |
| 243.0678 Cu II | 1   | 11.85  | - 16.95 | 4s2 1G | - | 4p 3G | 4 | - | 4 |
| 244.2640 Cu II | 3   | 8.64 - | 13.72   | 4s2 3F | - | 4p 5G | 4 | - | 5 |
| 244.3326 Cu II | 26  | 9.12 - | 14.20   | 4p 1P  | - | 4d 3S | 1 | - | 1 |
| 244.4657 Cu II | 0   | 8.87 - | 13.94   | 4s2 3F | - | 4p 5G | 3 | - | 2 |
| 244.5672 Cu II | 1   | 11.85  | - 16.92 | 4s2 1G | - | 4p 3D | 4 | - | 3 |
| 244.8213 Cu II | 2   | 11.03  | - 16.09 | 4s2 3P | - | 4p 3P | 0 | - | 1 |
| 245.2948 Cu II | 5   | 10.96  | - 16.01 | 4s2 3P | - | 4p 3D | 2 | - | 3 |
| 246.8501 Cu II | 63  | 8.66 - | 13.68   | 4p 3F  | - | 5s 1D | 2 | - | 2 |
| 246.8875 Cu II | 1   | 10.96  | - 15.98 | 4s2 3P | - | 4p 3D | 2 | - | 2 |
| 247.3334 Cu II | 262 | 8.42 - | 13.43   | 4p 3P  | - | 5s 3D | 1 | - | 2 |
| 247.7882 Cu II | 0   | 8.87 - | 13.87   | 4s2 3F | - | 4p 5G | 3 | - | 3 |
| 248.2548 Cu II | 0   | 11.85  | - 16.84 | 4s2 1G | - | 4p 3F | 4 | - | 4 |
| 248.3787 Cu II | 4   | 10.99  | - 15.98 | 4s2 3P | - | 4p 3D | 1 | - | 2 |
| 248.5792 Cu II | 484 | 8.66 - | 13.65   | 4p 3F  | - | 5s 3D | 2 | - | 1 |
| 248.6370 Cu II | 1   | 10.96  | - 15.94 | 4s2 3P | - | 4p 3D | 2 | - | 2 |
| 248.6978 Cu II | 1   | 10.96  | - 15.94 | 4s2 3P | - | 4p 3F | 2 | - | 3 |
| 248.8806 Cu II | 1   | 11.85  | - 16.83 | 4s2 1G | - | 4p 3F | 4 | - | 3 |
| 248.8954 Cu II | 1   | 13.65  | - 18.63 | 5s 3D  | - | 4p 3F | 1 | - | 2 |
| 248.9700 Cu II | 7   | 3.26 - | 8.23    | 4s 1D  | - | 4p 3P | 2 | - | 2 |
| 250.1495 Cu II | 2   | 10.99  | - 15.94 | 4s2 3P | - | 4p 3D | 1 | - | 2 |
| 250.6273 Cu II | 865 | 8.49 - | 13.43   | 4p 3F  | - | 5s 3D | 3 | - | 2 |
| 250.6533 Cu II | 2   | 13.68  | - 18.63 | 5s 1D  | - | 4p 3F | 2 | - | 2 |
| 250.8067 Cu II | 0   | 10.59  | - 15.53 | 4s2 1D | - | 4p 5P | 2 | - | 2 |

|               |     |       |   |       |        |   |       |   |   |   |
|---------------|-----|-------|---|-------|--------|---|-------|---|---|---|
| 250.9201Cu II | 1   | 10.59 | - | 15.53 | 4s2 1D | - | 4p 5P | 2 | - | 3 |
| 251.8079Cu II | 1   | 9.02  | - | 13.94 | 4s2 3F | - | 4p 5G | 2 | - | 2 |
| 251.8949Cu II | 2   | 8.87  | - | 13.79 | 4s2 3F | - | 4p 5G | 3 | - | 4 |
| 252.6323Cu II | 1   | 8.64  | - | 13.55 | 4s2 3F | - | 4p 5D | 4 | - | 3 |
| 252.6593Cu II | 174 | 8.49  | - | 13.39 | 4p 3F  | - | 5s 3D | 3 | - | 3 |
| 252.9304Cu II | 568 | 8.78  | - | 13.68 | 4p 3D  | - | 5s 1D | 3 | - | 2 |
| 254.4805Cu II | 742 | 8.52  | - | 13.39 | 4p 3F  | - | 5s 3D | 4 | - | 3 |
| 254.7686Cu II | 0   | 13.55 | - | 18.41 | 4p 5D  | - | 6d 1G | 3 | - | 4 |
| 255.3343Cu II | 1   | 9.02  | - | 13.87 | 4s2 3F | - | 4p 5G | 2 | - | 3 |
| 257.1756Cu II | 66  | 8.86  | - | 13.68 | 4p 3D  | - | 5s 1D | 2 | - | 2 |
| 257.4413Cu II | 1   | 8.87  | - | 13.68 | 4s2 3F | - | 4p 5D | 3 | - | 2 |
| 259.0529Cu II | 148 | 8.86  | - | 13.65 | 4p 3D  | - | 5s 3D | 2 | - | 1 |
| 259.3579Cu II | 0   | 11.85 | - | 16.63 | 4s2 1G | - | 4p 3H | 4 | - | 5 |
| 259.8812Cu II | 195 | 8.66  | - | 13.43 | 4p 3F  | - | 5s 3D | 2 | - | 2 |
| 260.0270Cu II | 450 | 8.92  | - | 13.68 | 4p 1F  | - | 5s 1D | 3 | - | 2 |
| 260.3336Cu II | 0   | 9.02  | - | 13.78 | 4s2 3F | - | 4p 5D | 2 | - | 1 |
| 261.2412Cu II | 0   | 13.68 | - | 18.43 | 4p 5D  | - | 6d 1F | 2 | - | 3 |
| 261.4413Cu II | 1   | 8.64  | - | 13.38 | 4s2 3F | - | 4p 5D | 4 | - | 4 |
| 261.7278Cu II | 0   | 13.68 | - | 18.42 | 4p 5D  | - | 6d 1D | 2 | - | 2 |
| 261.9211Cu II | 5   | 10.59 | - | 15.32 | 4s2 1D | - | 5p 1D | 2 | - | 2 |
| 262.0666Cu II | 9   | 8.66  | - | 13.39 | 4p 3F  | - | 5s 3D | 2 | - | 3 |
| 263.6620Cu II | 1   | 10.59 | - | 15.29 | 4s2 1D | - | 5p 3D | 2 | - | 1 |
| 264.5231Cu II | 0   | 14.34 | - | 19.03 | 4d 3G  | - | 6f 3H | 4 | - | 4 |
| 264.5619Cu II | 3   | 14.34 | - | 19.03 | 4d 3G  | - | 6f 1H | 4 | - | 5 |
| 264.8606Cu II | 1   | 8.87  | - | 13.55 | 4s2 3F | - | 4p 5D | 3 | - | 3 |
| 265.5965Cu II | 1   | 9.02  | - | 13.68 | 4s2 3F | - | 4p 5D | 2 | - | 2 |
| 265.6802Cu II | 0   | 10.59 | - | 15.25 | 4s2 1D | - | 5p 1F | 2 | - | 3 |
| 266.4604Cu II | 0   | 13.78 | - | 18.43 | 4p 5D  | - | 6d 3F | 1 | - | 2 |
| 266.6291Cu II | 117 | 8.78  | - | 13.43 | 4p 3D  | - | 5s 3D | 3 | - | 2 |
| 266.7370Cu II | 1   | 10.59 | - | 15.23 | 4s2 1D | - | 5p 1P | 2 | - | 1 |
| 267.0141Cu II | 0   | 14.05 | - | 18.69 | 4p 5F  | - | 8s 3D | 4 | - | 3 |
| 267.0478Cu II | 0   | 13.78 | - | 18.42 | 4p 5D  | - | 6d 1D | 1 | - | 2 |
| 267.4793Cu II | 0   | 14.39 | - | 19.03 | 4d 3D  | - | 6f 3H | 3 | - | 4 |
| 267.6067Cu II | 3   | 10.59 | - | 15.22 | 4s2 1D | - | 5p 3F | 2 | - | 2 |
| 268.1341Cu II | 1   | 13.55 | - | 18.17 | 4p 5D  | - | 6d 3F | 3 | - | 4 |
| 268.2750Cu II | 2   | 9.06  | - | 13.68 | 4p 3D  | - | 5s 1D | 1 | - | 2 |
| 268.5924Cu II | 0   | 13.55 | - | 18.16 | 4p 5D  | - | 6d 3D | 3 | - | 3 |
| 268.9300Cu II | 310 | 8.78  | - | 13.39 | 4p 3D  | - | 5s 3D | 3 | - | 3 |
| 269.1746Cu II | 0   | 13.55 | - | 18.15 | 4p 5D  | - | 6d 3P | 3 | - | 2 |
| 269.2494Cu II | 15  | 14.42 | - | 19.03 | 4d 3F  | - | 6f 3H | 3 | - | 4 |
| 269.5780Cu II | 1   | 14.43 | - | 19.03 | 4d 3F  | - | 6f 3H | 4 | - | 4 |
| 269.6184Cu II | 9   | 14.43 | - | 19.03 | 4d 3F  | - | 6f 1H | 4 | - | 5 |

|                |     |        |       |        |        |       |       |   |     |
|----------------|-----|--------|-------|--------|--------|-------|-------|---|-----|
| 270.0962 Cu II | 364 | 9.09 - | 13.68 | 4p 1D  | -      | 5s 1D | 2     | - | 2   |
| 270.3184 Cu II | 390 | 9.06 - | 13.65 | 4p 3D  | -      | 5s 3D | 1     | - | 1   |
| 270.4516 Cu II | 1   | 10.99  | -     | 15.57  | 4s2 3P | -     | 4p 5P | 1 | - 1 |
| 270.9760 Cu II | 0   | 14.20  | -     | 18.77  | 4d 3S  | -     | 6f 3D | 1 | - 2 |
| 271.0244 Cu II | 1   | 10.96  | -     | 15.53  | 4s2 3P | -     | 4p 5P | 2 | - 2 |
| 271.1569 Cu II | 1   | 10.96  | -     | 15.53  | 4s2 3P | -     | 4p 5P | 2 | - 3 |
| 271.1864 Cu II | 45  | 14.20  | -     | 18.77  | 4d 3S  | -     | 6f 3P | 1 | - 2 |
| 271.3508 Cu II | 372 | 8.86 - | 13.43 | 4p 3D  | -      | 5s 3D | 2     | - | 2   |
| 271.7915 Cu II | 0   | 14.13  | -     | 18.69  | 4p 5F  | -     | 8s 3D | 3 | - 2 |
| 271.8778 Cu II | 301 | 9.12 - | 13.68 | 4p 1P  | -      | 5s 1D | 1     | - | 2   |
| 272.1677 Cu II | 107 | 9.09 - | 13.65 | 4p 1D  | -      | 5s 3D | 2     | - | 1   |
| 272.8202 Cu II | 0   | 11.03  | -     | 15.57  | 4s2 3P | -     | 4p 5P | 0 | - 1 |
| 272.8225 Cu II | 0   | 10.99  | -     | 15.53  | 4s2 3P | -     | 4p 5P | 1 | - 2 |
| 272.8514 Cu II | 0   | 13.87  | -     | 18.41  | 4p 5G  | -     | 6d 1G | 3 | - 4 |
| 273.1949 Cu II | 11  | 10.59  | -     | 15.12  | 4s2 1D | -     | 5p 3D | 2 | - 2 |
| 273.3479 Cu II | 0   | 13.68  | -     | 18.22  | 4p 5D  | -     | 7s 1D | 2 | - 2 |
| 273.5004 Cu II | 0   | 9.02 - | 13.55 | 4s2 3F | -      | 4p 5D | 2     | - | 3   |
| 273.7342 Cu II | 16  | 8.86 - | 13.39 | 4p 3D  | -      | 5s 3D | 2     | - | 3   |
| 273.9767 Cu II | 13  | 9.12 - | 13.65 | 4p 1P  | -      | 5s 3D | 1     | - | 1   |
| 274.5271 Cu II | 57  | 8.92 - | 13.43 | 4p 1F  | -      | 5s 3D | 3     | - | 2   |
| 274.5592 Cu II | 0   | 8.87 - | 13.38 | 4s2 3F | -      | 4p 5D | 3     | - | 4   |
| 276.0748 Cu II | 0   | 13.68  | -     | 18.17  | 4p 5D  | -     | 6d 3D | 2 | - 2 |
| 276.2175 Cu II | 0   | 13.68  | -     | 18.17  | 4p 5D  | -     | 6d 3F | 2 | - 3 |
| 276.6500 Cu II | 1   | 10.59  | -     | 15.07  | 4s2 1D | -     | 5p 3D | 2 | - 3 |
| 276.9669 Cu II | 490 | 8.92 - | 13.39 | 4p 1F  | -      | 5s 3D | 3     | - | 3   |
| 277.2562 Cu II | 0   | 13.94  | -     | 18.41  | 4p 5G  | -     | 6d 3G | 2 | - 3 |
| 279.1795 Cu II | 390 | 14.33  | -     | 18.77  | 4d 3G  | -     | 6f 3H | 5 | - 6 |
| 279.2212 Cu II | 6   | 14.33  | -     | 18.77  | 4d 3G  | -     | 6f 3H | 5 | - 5 |
| 279.5195 Cu II | 20  | 14.34  | -     | 18.77  | 4d 3P  | -     | 6f 3D | 2 | - 2 |
| 279.5298 Cu II | 86  | 14.34  | -     | 18.77  | 4d 3P  | -     | 6f 3F | 2 | - 3 |
| 279.5475 Cu II | 0   | 13.78  | -     | 18.21  | 4p 5D  | -     | 7s 3D | 1 | - 1 |
| 279.5873 Cu II | 5   | 14.34  | -     | 18.77  | 4d 3G  | -     | 6f 3F | 4 | - 3 |
| 279.6630 Cu II | 0   | 11.85  | -     | 16.28  | 4s2 1G | -     | 4p 5D | 4 | - 3 |
| 279.7156 Cu II | 1   | 14.34  | -     | 18.77  | 4d 3G  | -     | 6f 3F | 4 | - 3 |
| 279.7256 Cu II | 65  | 14.34  | -     | 18.77  | 4d 3P  | -     | 6f 3D | 1 | - 2 |
| 279.7267 Cu II | 2   | 14.20  | -     | 18.63  | 4d 3S  | -     | 4p 3F | 1 | - 2 |
| 279.7434 Cu II | 69  | 14.34  | -     | 18.77  | 4d 3P  | -     | 6f 3P | 2 | - 2 |
| 279.9528 Cu II | 10  | 14.34  | -     | 18.77  | 4d 3P  | -     | 6f 3P | 1 | - 2 |
| 279.9529 Cu II | 316 | 14.34  | -     | 18.77  | 4d 3G  | -     | 6f 3H | 4 | - 5 |
| 279.9680 Cu II | 248 | 14.60  | -     | 19.03  | 4d 3G  | -     | 6f 3H | 3 | - 4 |
| 280.1050 Cu II | 1   | 10.59  | -     | 15.01  | 4s2 1D | -     | 4p 1F | 2 | - 3 |
| 281.0365 Cu II | 8   | 14.62  | -     | 19.03  | 4d 1G  | -     | 6f 3H | 4 | - 4 |

|                |     |        |       |       |        |       |       |   |   |   |
|----------------|-----|--------|-------|-------|--------|-------|-------|---|---|---|
| 281.0804 Cu II | 317 | 14.62  | -     | 19.03 | 4d 1G  | -     | 6f 1H | 4 | - | 5 |
| 281.2990 Cu II | 0   | 13.55  | -     | 17.95 | 4p 5D  | -     | 7s 3D | 3 | - | 3 |
| 281.3632 Cu II | 1   | 10.59  | -     | 14.99 | 4s2 1D | -     | 5p 3P | 2 | - | 1 |
| 281.7085 Cu II | 3   | 10.59  | -     | 14.99 | 4s2 1D | -     | 4p 1D | 2 | - | 2 |
| 282.5355 Cu II | 0   | 14.30  | -     | 18.69 | 4p 3G  | -     | 8s 3D | 4 | - | 3 |
| 282.8742 Cu II | 0   | 13.79  | -     | 18.17 | 4p 5G  | -     | 6d 3F | 4 | - | 4 |
| 282.8919 Cu II | 10  | 14.39  | -     | 18.77 | 4d 3D  | -     | 6f 3F | 3 | - | 3 |
| 283.0126 Cu II | 6   | 14.39  | -     | 18.77 | 4d 3D  | -     | 6f 3D | 3 | - | 2 |
| 283.0232 Cu II | 90  | 14.39  | -     | 18.77 | 4d 3D  | -     | 6f 3F | 3 | - | 3 |
| 283.2354 Cu II | 0   | 10.59  | -     | 14.96 | 4s2 1D | -     | 5p 3F | 2 | - | 3 |
| 283.2422 Cu II | 17  | 14.39  | -     | 18.77 | 4d 3D  | -     | 6f 3P | 3 | - | 2 |
| 283.7368 Cu II | 73  | 9.06 - | 13.43 | 4p 3D | -      | 5s 3D | 1     | - | 2 |   |
| 284.0492 Cu II | 3   | 10.96  | -     | 15.32 | 4s2 3P | -     | 5p 1D | 2 | - | 2 |
| 284.1365 Cu II | 0   | 13.79  | -     | 18.15 | 4p 5G  | -     | 6d 3G | 4 | - | 5 |
| 284.8725 Cu II | 61  | 14.42  | -     | 18.77 | 4d 3F  | -     | 6f 3F | 3 | - | 3 |
| 284.9950 Cu II | 8   | 14.42  | -     | 18.77 | 4d 3F  | -     | 6f 3D | 3 | - | 2 |
| 285.0057 Cu II | 2   | 14.42  | -     | 18.77 | 4d 3F  | -     | 6f 3F | 3 | - | 3 |
| 285.2278 Cu II | 0   | 14.42  | -     | 18.77 | 4d 3F  | -     | 6f 3P | 3 | - | 2 |
| 285.2405 Cu II | 2   | 14.43  | -     | 18.77 | 4d 3F  | -     | 6f 3F | 4 | - | 3 |
| 285.3740 Cu II | 11  | 14.43  | -     | 18.77 | 4d 3F  | -     | 6f 3F | 4 | - | 3 |
| 285.3757 Cu II | 117 | 14.43  | -     | 18.77 | 4d 3D  | -     | 6f 3F | 2 | - | 3 |
| 285.4986 Cu II | 51  | 14.43  | -     | 18.77 | 4d 3D  | -     | 6f 3D | 2 | - | 2 |
| 285.5094 Cu II | 17  | 14.43  | -     | 18.77 | 4d 3D  | -     | 6f 3F | 2 | - | 3 |
| 285.6210 Cu II | 6   | 14.43  | -     | 18.77 | 4d 3F  | -     | 6f 3H | 4 | - | 5 |
| 285.7322 Cu II | 8   | 14.43  | -     | 18.77 | 4d 3D  | -     | 6f 3P | 2 | - | 2 |
| 285.7748 Cu II | 4   | 9.09 - | 13.43 | 4p 1D | -      | 5s 3D | 2     | - | 2 |   |
| 285.8642 Cu II | 0   | 14.69  | -     | 19.03 | 4d 1F  | -     | 6f 3H | 3 | - | 4 |
| 286.0249 Cu II | 1   | 10.99  | -     | 15.32 | 4s2 3P | -     | 5p 1D | 1 | - | 2 |
| 287.7100 Cu II | 0   | -      | -     | -     | -      | -     | -     | - | - | - |
| 287.7699 Cu II | 97  | 9.12 - | 13.43 | 4p 1P | -      | 5s 3D | 1     | - | 2 |   |
| 288.0700 Cu II | 0   | 10.59  | -     | 14.89 | 4s2 1D | -     | 5p 3P | 2 | - | 2 |
| 288.1022 Cu II | 1   | 10.99  | -     | 15.29 | 4s2 3P | -     | 5p 3D | 1 | - | 1 |
| 288.4196 Cu II | 29  | 9.09 - | 13.39 | 4p 1D | -      | 5s 3D | 2     | - | 3 |   |
| 288.4756 Cu II | 1   | 10.96  | -     | 15.25 | 4s2 3P | -     | 5p 1F | 2 | - | 3 |
| 288.6769 Cu II | 0   | 14.13  | -     | 18.43 | 4p 5F  | -     | 6d 1F | 3 | - | 3 |
| 288.8401 Cu II | 3   | 14.34  | -     | 18.63 | 4d 3P  | -     | 4p 3F | 2 | - | 2 |
| 289.3776 Cu II | 0   | 13.87  | -     | 18.15 | 4p 5G  | -     | 6d 3G | 3 | - | 4 |
| 289.6085 Cu II | 0   | 13.68  | -     | 17.96 | 4p 5D  | -     | 7s 3D | 2 | - | 2 |
| 289.6434 Cu II | 1   | 14.13  | -     | 18.41 | 4p 5F  | -     | 6d 1G | 3 | - | 4 |
| 289.7220 Cu II | 1   | 10.96  | -     | 15.23 | 4s2 3P | -     | 5p 1P | 2 | - | 1 |
| 290.5530 Cu II | 1   | 14.43  | -     | 18.69 | 4p 3D  | -     | 8s 3D | 3 | - | 2 |



|               |    |       |   |       |        |   |       |   |   |   |
|---------------|----|-------|---|-------|--------|---|-------|---|---|---|
| 290.7483Cu II | 1  | 10.96 | - | 15.22 | 4s2 3P | - | 5p 3F | 2 | - | 2 |
| 290.7916Cu II | 1  | 11.03 | - | 15.29 | 4s2 3P | - | 5p 3D | 0 | - | 1 |
| 290.8874Cu II | 2  | 14.43 | - | 18.69 | 4p 3D  | - | 8s 3D | 3 | - | 3 |
| 291.7777Cu II | 1  | 10.99 | - | 15.23 | 4s2 3P | - | 5p 1P | 1 | - | 1 |
| 292.5717Cu II | 3  | 14.39 | - | 18.63 | 4d 3D  | - | 4p 3F | 3 | - | 2 |
|               |    |       |   |       |        |   |       |   |   |   |
| 292.6475Cu II | 0  | 14.19 | - | 18.43 | 4p 5F  | - | 6d 3F | 2 | - | 2 |
| 292.7923Cu II | 3  | 14.53 | - | 18.77 | 4d 1P  | - | 6f 3P | 1 | - | 2 |
| 292.8186Cu II | 0  | 10.99 | - | 15.22 | 4s2 3P | - | 5p 3F | 1 | - | 2 |
| 292.8387Cu II | 0  | 14.46 | - | 18.69 | 4p 3G  | - | 8s 3D | 3 | - | 2 |
| 293.1784Cu II | 1  | 14.46 | - | 18.69 | 4p 3G  | - | 8s 3D | 3 | - | 3 |
|               |    |       |   |       |        |   |       |   |   |   |
| 294.0309Cu II | 1  | 14.19 | - | 18.41 | 4p 5F  | - | 6d 3G | 2 | - | 3 |
| 294.5364Cu II | 0  | 11.03 | - | 15.23 | 4s2 3P | - | 5p 1P | 0 | - | 1 |
| 294.6907Cu II | 2  | 14.42 | - | 18.63 | 4d 3F  | - | 4p 3F | 3 | - | 2 |
| 295.2292Cu II | 1  | 14.43 | - | 18.63 | 4d 3D  | - | 4p 3F | 2 | - | 2 |
| 296.8988Cu II | 4  | 14.60 | - | 18.77 | 4d 3G  | - | 6f 3F | 3 | - | 3 |
|               |    |       |   |       |        |   |       |   |   |   |
| 297.0319Cu II | 1  | 14.60 | - | 18.77 | 4d 3G  | - | 6f 3D | 3 | - | 2 |
| 297.0436Cu II | 0  | 14.60 | - | 18.77 | 4d 3G  | - | 6f 3F | 3 | - | 3 |
| 297.0714Cu II | 2  | 14.52 | - | 18.69 | 4p 3D  | - | 8s 3D | 2 | - | 2 |
| 297.0825Cu II | 1  | 10.59 | - | 14.76 | 4s2 1D | - | 4p 3F | 2 | - | 2 |
| 297.3565Cu II | 1  | 10.96 | - | 15.12 | 4s2 3P | - | 5p 3D | 2 | - | 2 |
|               |    |       |   |       |        |   |       |   |   |   |
| 297.3647Cu II | 1  | 10.99 | - | 15.15 | 4s2 3P | - | 5p 3P | 1 | - | 0 |
| 297.4210Cu II | 1  | 14.52 | - | 18.69 | 4p 3D  | - | 8s 3D | 2 | - | 3 |
| 297.5658Cu II | 0  | 13.79 | - | 17.95 | 4p 5G  | - | 7s 3D | 4 | - | 3 |
| 297.9641Cu II | 1  | 11.85 | - | 16.01 | 4s2 1G | - | 4p 3D | 4 | - | 3 |
| 298.1007Cu II | 1  | 14.62 | - | 18.77 | 4d 1G  | - | 6f 3F | 4 | - | 3 |
|               |    |       |   |       |        |   |       |   |   |   |
| 298.1786Cu II | 1  | 13.39 | - | 17.55 | 5s 3D  | - | 6p 1D | 3 | - | 2 |
| 298.2466Cu II | 1  | 14.62 | - | 18.77 | 4d 1G  | - | 6f 3F | 4 | - | 3 |
| 298.3766Cu II | 5  | 14.20 | - | 18.35 | 4d 3S  | - | 5f 3D | 1 | - | 1 |
| 298.5163Cu II | 2  | 14.62 | - | 18.77 | 4d 1G  | - | 6f 3H | 4 | - | 5 |
| 298.6335Cu II | 22 | 14.20 | - | 18.35 | 4d 3S  | - | 5f 1D | 1 | - | 2 |
|               |    |       |   |       |        |   |       |   |   |   |
| 298.6368Cu II | 1  | 14.62 | - | 18.77 | 4d 3D  | - | 6f 3D | 1 | - | 2 |
| 298.8924Cu II | 0  | 14.62 | - | 18.77 | 4d 3D  | - | 6f 3P | 1 | - | 2 |
| 299.3268Cu II | 1  | 13.43 | - | 17.57 | 5s 3D  | - | 6p 3F | 2 | - | 2 |
| 299.5224Cu II | 0  | 10.99 | - | 15.12 | 4s2 3P | - | 5p 3D | 1 | - | 2 |
| 300.6019Cu II | 1  | 14.05 | - | 18.17 | 4p 5F  | - | 6d 3F | 4 | - | 4 |
|               |    |       |   |       |        |   |       |   |   |   |
| 300.6122Cu II | 3  | 14.65 | - | 18.77 | 4d 1D  | - | 6f 3F | 2 | - | 3 |
| 300.7486Cu II | 1  | 14.65 | - | 18.77 | 4d 1D  | - | 6f 3D | 2 | - | 2 |
| 300.7606Cu II | 3  | 14.65 | - | 18.77 | 4d 1D  | - | 6f 3F | 2 | - | 3 |
| 301.0046Cu II | 0  | 11.85 | - | 15.97 | 4s2 1G | - | 4p 3F | 4 | - | 4 |
| 301.0078Cu II | 2  | 14.65 | - | 18.77 | 4d 1D  | - | 6f 3P | 2 | - | 2 |
|               |    |       |   |       |        |   |       |   |   |   |
| 301.0591Cu II | 4  | 13.43 | - | 17.55 | 5s 3D  | - | 6p 1D | 2 | - | 2 |
| 301.1780Cu II | 0  | 14.05 | - | 18.16 | 4p 5F  | - | 6d 3D | 4 | - | 3 |

|               |   |       |   |       |        |   |       |   |   |   |
|---------------|---|-------|---|-------|--------|---|-------|---|---|---|
| 301.2278Cu II | 1 | 13.39 | - | 17.51 | 5s 3D  | - | 6p 1F | 3 | - | 3 |
| 301.4543Cu II | 2 | 10.96 | - | 15.07 | 4s2 3P | - | 5p 3D | 2 | - | 3 |
| 301.8409Cu II | 0 | 14.05 | - | 18.15 | 4p 5F  | - | 6d 3G | 4 | - | 4 |
| 302.0278Cu II | 1 | 14.05 | - | 18.15 | 4p 5F  | - | 6d 3G | 4 | - | 5 |
| 302.2435Cu II | 4 | 14.59 | - | 18.69 | 4p 3F  | - | 8s 3D | 4 | - | 3 |
| 302.7725Cu II | 1 | 14.53 | - | 18.63 | 4d 1P  | - | 4p 3F | 1 | - | 2 |
| 302.8818Cu II | 0 | 13.87 | - | 17.96 | 4p 5G  | - | 7s 3D | 3 | - | 2 |
| 303.0002Cu II | 1 | 11.85 | - | 15.94 | 4s2 1G | - | 4p 3F | 4 | - | 3 |
| 303.5319Cu II | 0 | 14.13 | - | 18.22 | 4p 5F  | - | 7s 1D | 3 | - | 2 |
| 303.5381Cu II | 0 | 14.69 | - | 18.77 | 4d 1F  | - | 6f 3F | 3 | - | 3 |
| 303.6771Cu II | 0 | 14.69 | - | 18.77 | 4d 1F  | - | 6f 3D | 3 | - | 2 |
| 303.6894Cu II | 1 | 14.69 | - | 18.77 | 4d 1F  | - | 6f 3F | 3 | - | 3 |
| 303.7801Cu II | 1 | 13.43 | - | 17.51 | 5s 3D  | - | 6p 3D | 2 | - | 1 |
| 303.9415Cu II | 1 | 14.69 | - | 18.77 | 4d 1F  | - | 6f 3P | 3 | - | 2 |
| 304.1337Cu II | 1 | 14.70 | - | 18.77 | 4d 3F  | - | 6f 3F | 2 | - | 3 |
| 304.1678Cu II | 6 | 13.43 | - | 17.51 | 5s 3D  | - | 6p 1F | 2 | - | 3 |
| 304.3865Cu II | 1 | 14.70 | - | 18.77 | 4d 3F  | - | 6f 3P | 2 | - | 2 |
| 305.2158Cu II | 1 | 10.59 | - | 14.65 | 4s2 1D | - | 4p 3F | 2 | - | 3 |
| 305.5612Cu II | 0 | 10.96 | - | 15.01 | 4s2 3P | - | 4p 1F | 2 | - | 3 |
| 305.6173Cu II | 1 | 14.64 | - | 18.69 | 4p 3D  | - | 8s 3D | 1 | - | 2 |
| 305.8849Cu II | 1 | 10.59 | - | 14.64 | 4s2 1D | - | 4p 3D | 2 | - | 1 |
| 306.2882Cu II | 3 | 14.65 | - | 18.69 | 4p 3F  | - | 8s 3D | 3 | - | 2 |
| 306.6598Cu II | 3 | 14.65 | - | 18.69 | 4p 3F  | - | 8s 3D | 3 | - | 3 |
| 306.8980Cu II | 0 | 14.13 | - | 18.17 | 4p 5F  | - | 6d 3D | 3 | - | 2 |
| 307.0591Cu II | 0 | 10.96 | - | 14.99 | 4s2 3P | - | 5p 3P | 2 | - | 1 |
| 307.0744Cu II | 1 | 14.13 | - | 18.17 | 4p 5F  | - | 6d 3F | 3 | - | 3 |
| 307.4704Cu II | 1 | 10.96 | - | 14.99 | 4s2 3P | - | 4p 1D | 2 | - | 2 |
| 307.5789Cu II | 1 | 14.60 | - | 18.63 | 4d 3G  | - | 4p 3F | 3 | - | 2 |
| 307.6440Cu II | 0 | 14.13 | - | 18.16 | 4p 5F  | - | 6d 3D | 3 | - | 3 |
| 307.9424Cu II | 1 | 14.34 | - | 18.36 | 4d 3P  | - | 5f 3G | 2 | - | 3 |
| 307.9845Cu II | 0 | 14.33 | - | 18.35 | 4d 3G  | - | 5f 1H | 5 | - | 5 |
| 308.0328Cu II | 0 | 14.19 | - | 18.22 | 4p 5F  | - | 7s 1D | 2 | - | 2 |
| 308.1453Cu II | 2 | 14.34 | - | 18.36 | 4d 3G  | - | 5f 1G | 4 | - | 4 |
| 308.1679Cu II | 0 | 14.34 | - | 18.36 | 4d 3G  | - | 5f 3G | 4 | - | 3 |
| 308.2935Cu II | 1 | 14.34 | - | 18.36 | 4d 3P  | - | 5f 3F | 2 | - | 2 |
| 308.3357Cu II | 1 | 14.13 | - | 18.15 | 4p 5F  | - | 6d 3G | 3 | - | 4 |
| 308.3367Cu II | 5 | 14.34 | - | 18.36 | 4d 3P  | - | 5f 1F | 2 | - | 3 |
| 308.4081Cu II | 0 | 14.13 | - | 18.15 | 4p 5F  | - | 6d 3P | 3 | - | 2 |
| 308.5097Cu II | 0 | 14.19 | - | 18.21 | 4p 5F  | - | 7s 3D | 2 | - | 1 |
| 308.5443Cu II | 2 | 14.34 | - | 18.36 | 4d 3P  | - | 5f 3F | 1 | - | 2 |
| 308.5628Cu II | 0 | 14.34 | - | 18.36 | 4d 3G  | - | 5f 1F | 4 | - | 3 |
| 308.7682Cu II | 1 | 14.34 | - | 18.35 | 4d 3P  | - | 5f 3D | 2 | - | 1 |

|                |    |       |   |       |        |   |       |   |   |   |
|----------------|----|-------|---|-------|--------|---|-------|---|---|---|
| 308.8287 Cu II | 0  | 14.34 | - | 18.35 | 4d 3G  | - | 5f 3H | 4 | - | 4 |
| 308.8749 Cu II | 10 | 14.34 | - | 18.35 | 4d 3G  | - | 5f 1H | 4 | - | 5 |
| 309.0197 Cu II | 1  | 14.34 | - | 18.35 | 4d 3P  | - | 5f 3D | 1 | - | 1 |
| 309.0432 Cu II | 1  | 14.34 | - | 18.35 | 4d 3P  | - | 5f 1D | 2 | - | 2 |
| 309.2902 Cu II | 1  | 10.96 | - | 14.96 | 4s2 3P | - | 5p 3F | 2 | - | 3 |
| 309.2951 Cu II | 1  | 14.34 | - | 18.35 | 4d 3P  | - | 5f 1D | 1 | - | 2 |
| 309.3002 Cu II | 0  | 14.62 | - | 18.63 | 4d 3D  | - | 4p 3F | 1 | - | 2 |
| 309.3691 Cu II | 0  | 10.99 | - | 14.99 | 4s2 3P | - | 5p 3P | 1 | - | 1 |
| 309.7866 Cu II | 1  | 10.99 | - | 14.99 | 4s2 3P | - | 4p 1D | 1 | - | 2 |
| 309.8235 Cu II | 0  | 14.43 | - | 18.43 | 4p 3D  | - | 6d 3F | 3 | - | 2 |
| 309.9329 Cu II | 1  | 14.43 | - | 18.43 | 4p 3D  | - | 6d 1F | 3 | - | 3 |
| 310.6180 Cu II | 0  | 14.43 | - | 18.42 | 4p 3D  | - | 6d 1D | 3 | - | 2 |
| 311.0472 Cu II | 4  | 14.43 | - | 18.41 | 4p 3D  | - | 6d 1G | 3 | - | 4 |
| 311.3745 Cu II | 1  | 14.43 | - | 18.41 | 4p 3D  | - | 6d 3G | 3 | - | 3 |
| 311.5661 Cu II | 1  | 14.65 | - | 18.63 | 4d 1D  | - | 4p 3F | 2 | - | 2 |
| 311.6818 Cu II | 0  | 14.19 | - | 18.17 | 4p 5F  | - | 6d 3F | 2 | - | 3 |
| 312.1642 Cu II | 7  | 14.39 | - | 18.36 | 4d 3D  | - | 5f 1G | 3 | - | 4 |
| 312.1874 Cu II | 1  | 14.39 | - | 18.36 | 4d 3D  | - | 5f 3G | 3 | - | 3 |
| 312.4238 Cu II | 0  | 14.46 | - | 18.43 | 4p 3G  | - | 6d 3F | 3 | - | 2 |
| 312.4722 Cu II | 1  | 11.03 | - | 14.99 | 4s2 3P | - | 5p 3P | 0 | - | 1 |
| 312.5350 Cu II | 1  | 14.46 | - | 18.43 | 4p 3G  | - | 6d 1F | 3 | - | 3 |
| 312.5483 Cu II | 0  | 14.39 | - | 18.36 | 4d 3D  | - | 5f 3F | 3 | - | 2 |
| 312.5927 Cu II | 1  | 14.39 | - | 18.36 | 4d 3D  | - | 5f 1F | 3 | - | 3 |
| 312.8656 Cu II | 1  | 14.39 | - | 18.35 | 4d 3D  | - | 5f 3H | 3 | - | 4 |
| 313.2317 Cu II | 0  | 14.46 | - | 18.42 | 4p 3G  | - | 6d 1D | 3 | - | 2 |
| 313.3188 Cu II | 0  | 14.39 | - | 18.35 | 4d 3D  | - | 5f 1D | 3 | - | 2 |
| 313.6681 Cu II | 2  | 14.46 | - | 18.41 | 4p 3G  | - | 6d 1G | 3 | - | 4 |
| 314.0010 Cu II | 0  | 14.46 | - | 18.41 | 4p 3G  | - | 6d 3G | 3 | - | 3 |
| 314.5777 Cu II | 0  | 14.42 | - | 18.36 | 4d 3F  | - | 5f 1G | 3 | - | 4 |
| 314.6012 Cu II | 6  | 14.42 | - | 18.36 | 4d 3F  | - | 5f 3G | 3 | - | 3 |
| 314.7101 Cu II | 1  | 14.69 | - | 18.63 | 4d 1F  | - | 4p 3F | 3 | - | 2 |
| 314.8539 Cu II | 1  | 14.75 | - | 18.69 | 4p 1G  | - | 8s 3D | 4 | - | 3 |
| 314.9407 Cu II | 2  | 14.76 | - | 18.69 | 4p 3F  | - | 8s 3D | 2 | - | 2 |
| 314.9531 Cu II | 1  | 10.59 | - | 14.52 | 4s2 1D | - | 4p 3D | 2 | - | 2 |
| 314.9677 Cu II | 1  | 14.42 | - | 18.36 | 4d 3F  | - | 5f 3F | 3 | - | 2 |
| 315.0265 Cu II | 4  | 14.43 | - | 18.36 | 4d 3F  | - | 5f 1G | 4 | - | 4 |
| 315.0500 Cu II | 1  | 14.43 | - | 18.36 | 4d 3F  | - | 5f 3G | 4 | - | 3 |
| 315.0642 Cu II | 1  | 10.96 | - | 14.89 | 4s2 3P | - | 5p 3P | 2 | - | 2 |
| 315.1051 Cu II | 14 | 13.39 | - | 17.33 | 5s 3D  | - | 6p 3D | 3 | - | 3 |
| 315.1873 Cu II | 1  | 14.70 | - | 18.63 | 4d 3F  | - | 4p 3F | 2 | - | 2 |
| 315.2150 Cu II | 1  | 14.43 | - | 18.36 | 4d 3D  | - | 5f 3G | 2 | - | 3 |

|               |     |       |   |       |        |   |       |   |   |   |
|---------------|-----|-------|---|-------|--------|---|-------|---|---|---|
| 315.2900Cu II | 44  | 14.42 | - | 18.35 | 4d 3F  | - | 5f 3H | 3 | - | 4 |
| 315.3336Cu II | 1   | 14.76 | - | 18.69 | 4p 3F  | - | 8s 3D | 2 | - | 3 |
| 315.4094Cu II | 1   | 13.39 | - | 17.32 | 5s 3D  | - | 6p 3D | 3 | - | 2 |
| 315.4628Cu II | 1   | 14.43 | - | 18.36 | 4d 3F  | - | 5f 1F | 4 | - | 3 |
| 315.5829Cu II | 1   | 14.43 | - | 18.36 | 4d 3D  | - | 5f 3F | 2 | - | 2 |
|               |     |       |   |       |        |   |       |   |   |   |
| 315.6282Cu II | 18  | 14.43 | - | 18.36 | 4d 3D  | - | 5f 1F | 2 | - | 3 |
| 315.7408Cu II | 1   | 14.43 | - | 18.35 | 4d 3F  | - | 5f 3H | 4 | - | 4 |
| 315.7890Cu II | 27  | 14.43 | - | 18.35 | 4d 3F  | - | 5f 1H | 4 | - | 5 |
| 315.8673Cu II | 18  | 13.65 | - | 17.57 | 5s 3D  | - | 6p 3F | 1 | - | 2 |
| 316.0804Cu II | 1   | 14.43 | - | 18.35 | 4d 3D  | - | 5f 3D | 2 | - | 1 |
|               |     |       |   |       |        |   |       |   |   |   |
| 316.3685Cu II | 4   | 14.43 | - | 18.35 | 4d 3D  | - | 5f 1D | 2 | - | 2 |
| 317.2462Cu II | 0   | 14.52 | - | 18.43 | 4p 3D  | - | 6d 3F | 2 | - | 2 |
| 317.2467Cu II | 1   | 14.05 | - | 17.95 | 4p 5F  | - | 7s 3D | 4 | - | 3 |
| 317.3609Cu II | 7   | 14.52 | - | 18.43 | 4p 3D  | - | 6d 1F | 2 | - | 3 |
| 317.4967Cu II | 1   | 10.99 | - | 14.89 | 4s2 3P | - | 5p 3P | 1 | - | 2 |
|               |     |       |   |       |        |   |       |   |   |   |
| 317.6311Cu II | 0   | 14.20 | - | 18.10 | 4d 3S  | - | 5f 3D | 1 | - | 2 |
| 317.7970Cu II | 1   | 13.65 | - | 17.55 | 5s 3D  | - | 6p 1D | 1 | - | 2 |
| 317.9316Cu II | 1   | 14.20 | - | 18.10 | 4d 3S  | - | 5f 1P | 1 | - | 1 |
| 317.9784Cu II | 61  | 14.45 | - | 18.35 | 4d 3P  | - | 5f 3D | 0 | - | 1 |
| 318.0793Cu II | 3   | 14.52 | - | 18.42 | 4p 3D  | - | 6d 1D | 2 | - | 2 |
|               |     |       |   |       |        |   |       |   |   |   |
| 318.2172Cu II | 148 | 14.20 | - | 18.09 | 4d 3S  | - | 5f 3P | 1 | - | 2 |
| 318.3236Cu II | 7   | 13.43 | - | 17.33 | 5s 3D  | - | 6p 3D | 2 | - | 3 |
| 318.4682Cu II | 0   | 14.52 | - | 18.41 | 4p 3D  | - | 6d 3D | 2 | - | 1 |
| 318.4841Cu II | 180 | 14.20 | - | 18.09 | 4d 3S  | - | 5f 3P | 1 | - | 1 |
| 318.5725Cu II | 35  | 13.39 | - | 17.28 | 5s 3D  | - | 6p 3F | 3 | - | 4 |
|               |     |       |   |       |        |   |       |   |   |   |
| 318.6015Cu II | 76  | 14.20 | - | 18.09 | 4d 3S  | - | 5f 3P | 1 | - | 0 |
| 318.6341Cu II | 6   | 13.43 | - | 17.32 | 5s 3D  | - | 6p 3D | 2 | - | 2 |
| 318.7039Cu II | 0   | 13.68 | - | 17.57 | 5s 1D  | - | 6p 3F | 2 | - | 2 |
| 318.8726Cu II | 5   | 14.52 | - | 18.41 | 4p 3D  | - | 6d 3G | 2 | - | 3 |
| 319.2301Cu II | 15  | 13.39 | - | 17.28 | 5s 3D  | - | 6p 3F | 3 | - | 3 |
|               |     |       |   |       |        |   |       |   |   |   |
| 319.8546Cu II | 1   | 10.59 | - | 14.46 | 4s2 1D | - | 4p 3G | 2 | - | 3 |
| 320.1001Cu II | 1   | 14.52 | - | 18.39 | 4p 3D  | - | 6d 1P | 2 | - | 1 |
| 320.4184Cu II | 0   | 14.30 | - | 18.17 | 4p 3G  | - | 6d 3F | 4 | - | 4 |
| 320.6685Cu II | 11  | 13.68 | - | 17.55 | 5s 1D  | - | 6p 1D | 2 | - | 2 |
| 320.8305Cu II | 10  | 13.65 | - | 17.51 | 5s 3D  | - | 6p 3D | 1 | - | 1 |
|               |     |       |   |       |        |   |       |   |   |   |
| 321.0730Cu II | 0   | 14.30 | - | 18.16 | 4p 3G  | - | 6d 3D | 4 | - | 3 |
| 321.1274Cu II | 1   | 14.64 | - | 18.50 | 4p 3D  | - | 6d 1S | 1 | - | 0 |
| 321.8264Cu II | 0   | 14.30 | - | 18.15 | 4p 3G  | - | 6d 3G | 4 | - | 4 |
| 322.0389Cu II | 1   | 14.30 | - | 18.15 | 4p 3G  | - | 6d 3G | 4 | - | 5 |
| 322.3434Cu II | 4   | 13.39 | - | 17.24 | 5s 3D  | - | 4p 3D | 3 | - | 2 |
|               |     |       |   |       |        |   |       |   |   |   |
| 322.5339Cu II | 8   | 13.43 | - | 17.28 | 5s 3D  | - | 6p 3F | 2 | - | 3 |
| 322.6267Cu II | 1   | 10.59 | - | 14.43 | 4s2 1D | - | 4p 3D | 2 | - | 3 |

|               |      |       |   |       |        |   |       |   |   |   |  |
|---------------|------|-------|---|-------|--------|---|-------|---|---|---|--|
| 323.4734Cu II | 6    | 13.43 | - | 17.26 | 5s 3D  | - | 6p 3P | 2 | - | 1 |  |
| 323.5623Cu II | 1    | 13.65 | - | 17.48 | 5s 3D  | - | 6p 1P | 1 | - | 1 |  |
| 323.7141Cu II | 1    | 14.13 | - | 17.96 | 4p 5F  | - | 7s 3D | 3 | - | 2 |  |
| 323.7573Cu II | 2    | 13.68 | - | 17.51 | 5s 1D  | - | 6p 3D | 2 | - | 1 |  |
| 324.0669Cu II | 0    | 14.59 | - | 18.41 | 4p 3F  | - | 6d 1G | 4 | - | 4 |  |
| 324.1977Cu II | 13   | 13.68 | - | 17.51 | 5s 1D  | - | 6p 1F | 2 | - | 3 |  |
| 324.2174Cu II | 1    | 14.53 | - | 18.36 | 4d 1P  | - | 5f 3F | 1 | - | 2 |  |
| 324.4293Cu II | 0    | 14.13 | - | 17.95 | 4p 5F  | - | 7s 3D | 3 | - | 3 |  |
| 324.7424Cu II | 70   | 14.53 | - | 18.35 | 4d 1P  | - | 5f 3D | 1 | - | 1 |  |
| 325.0466Cu II | 326  | 14.53 | - | 18.35 | 4d 1P  | - | 5f 1D | 1 | - | 2 |  |
| 325.7122Cu II | 2    | 13.43 | - | 17.24 | 5s 3D  | - | 4p 3D | 2 | - | 2 |  |
| 325.7443Cu II | 3    | 14.89 | - | 18.69 | 5p 3P  | - | 8s 3D | 2 | - | 2 |  |
| 325.8764Cu II | 0    | 10.96 | - | 14.76 | 4s2 3P | - | 4p 3F | 2 | - | 2 |  |
| 326.1647Cu II | 49   | 14.89 | - | 18.69 | 5p 3P  | - | 8s 3D | 2 | - | 3 |  |
| 326.5394Cu II | 4    | 13.68 | - | 17.48 | 5s 1D  | - | 6p 1P | 2 | - | 1 |  |
| 327.0112Cu II | 12   | 14.64 | - | 18.43 | 4p 3D  | - | 6d 3F | 1 | - | 2 |  |
| 327.1211Cu II | 2    | 14.43 | - | 18.22 | 4p 3D  | - | 7s 1D | 3 | - | 2 |  |
| 327.7794Cu II | 0    | 14.65 | - | 18.43 | 4p 3F  | - | 6d 3F | 3 | - | 2 |  |
| 327.8965Cu II | 5    | 14.64 | - | 18.42 | 4p 3D  | - | 6d 1D | 1 | - | 2 |  |
| 327.9019Cu II | 1    | 14.65 | - | 18.43 | 4p 3F  | - | 6d 1F | 3 | - | 3 |  |
| 328.1697Cu II | 198  | 14.33 | - | 18.11 | 4d 3G  | - | 5f 3G | 5 | - | 5 |  |
| 328.2011Cu II | 17   | 14.33 | - | 18.11 | 4d 3G  | - | 5f 3G | 5 | - | 4 |  |
| 328.2602Cu II | 4    | 14.33 | - | 18.10 | 4d 3G  | - | 5f 3F | 5 | - | 4 |  |
| 328.3098Cu II | 8    | 14.64 | - | 18.41 | 4p 3D  | - | 6d 3D | 1 | - | 1 |  |
| 328.4794Cu II | 1    | 10.99 | - | 14.76 | 4s2 3P | - | 4p 3F | 1 | - | 2 |  |
| 328.9921Cu II | 1    | 13.39 | - | 17.16 | 5s 3D  | - | 4p 3G | 3 | - | 3 |  |
| 329.0418Cu II | 1283 | 14.33 | - | 18.10 | 4d 3G  | - | 5f 3H | 5 | - | 6 |  |
| 329.0424Cu II | 21   | 14.34 | - | 18.10 | 4d 3P  | - | 5f 3D | 2 | - | 3 |  |
| 329.1060Cu II | 20   | 14.33 | - | 18.10 | 4d 3G  | - | 5f 3H | 5 | - | 5 |  |
| 329.1494Cu II | 1    | 14.65 | - | 18.41 | 4p 3F  | - | 6d 1G | 3 | - | 4 |  |
| 329.1808Cu II | 3    | 14.34 | - | 18.11 | 4d 3G  | - | 5f 3G | 4 | - | 5 |  |
| 329.2123Cu II | 3    | 14.34 | - | 18.11 | 4d 3G  | - | 5f 3G | 4 | - | 4 |  |
| 329.2718Cu II | 171  | 14.34 | - | 18.10 | 4d 3G  | - | 5f 3F | 4 | - | 4 |  |
| 329.2998Cu II | 15   | 14.34 | - | 18.10 | 4d 3G  | - | 5f 3D | 4 | - | 3 |  |
| 329.3075Cu II | 3    | 14.60 | - | 18.36 | 4d 3G  | - | 5f 1G | 3 | - | 4 |  |
| 329.3333Cu II | 91   | 14.60 | - | 18.36 | 4d 3G  | - | 5f 3G | 3 | - | 3 |  |
| 329.4335Cu II | 63   | 14.34 | - | 18.10 | 4d 3P  | - | 5f 3D | 2 | - | 2 |  |
| 329.5102Cu II | 283  | 14.34 | - | 18.10 | 4d 3P  | - | 5f 3F | 2 | - | 3 |  |
| 329.5159Cu II | 0    | 14.65 | - | 18.41 | 4p 3F  | - | 6d 3G | 3 | - | 3 |  |
| 329.7199Cu II | 212  | 14.34 | - | 18.10 | 4d 3P  | - | 5f 3D | 1 | - | 2 |  |
| 329.7349Cu II | 5    | 14.60 | - | 18.36 | 4d 3G  | - | 5f 3F | 3 | - | 2 |  |
| 329.7569Cu II | 10   | 14.34 | - | 18.10 | 4d 3P  | - | 5f 1P | 2 | - | 1 |  |

|               |      |       |   |       |       |   |       |   |   |   |  |
|---------------|------|-------|---|-------|-------|---|-------|---|---|---|--|
| 329.7684Cu II | 1    | 14.34 | - | 18.10 | 4d 3G | - | 5f 3F | 4 | - | 3 |  |
| 329.7843Cu II | 0    | 14.60 | - | 18.36 | 4d 3G | - | 5f 1F | 3 | - | 3 |  |
| 330.0211Cu II | 1    | 14.46 | - | 18.22 | 4p 3G | - | 7s 1D | 3 | - | 2 |  |
| 330.0438Cu II | 147  | 14.34 | - | 18.10 | 4d 3P | - | 5f 1P | 1 | - | 1 |  |
| 330.0444Cu II | 0    | 14.64 | - | 18.39 | 4p 3D | - | 6d 1P | 1 | - | 1 |  |
| 330.0641Cu II | 224  | 14.34 | - | 18.09 | 4d 3P | - | 5f 3P | 2 | - | 2 |  |
| 330.0881Cu II | 817  | 14.60 | - | 18.35 | 4d 3G | - | 5f 3H | 3 | - | 4 |  |
| 330.1229Cu II | 1038 | 14.34 | - | 18.10 | 4d 3G | - | 5f 3H | 4 | - | 5 |  |
| 330.3512Cu II | 83   | 14.34 | - | 18.09 | 4d 3P | - | 5f 3P | 2 | - | 1 |  |
| 330.3515Cu II | 31   | 14.34 | - | 18.09 | 4d 3P | - | 5f 3P | 1 | - | 2 |  |
| 330.6392Cu II | 2    | 14.34 | - | 18.09 | 4d 3P | - | 5f 3P | 1 | - | 1 |  |
| 330.7657Cu II | 21   | 14.34 | - | 18.09 | 4d 3P | - | 5f 3P | 1 | - | 0 |  |
| 330.7868Cu II | 118  | 14.62 | - | 18.36 | 4d 1G | - | 5f 1G | 4 | - | 4 |  |
| 330.8127Cu II | 4    | 14.62 | - | 18.36 | 4d 1G | - | 5f 3G | 4 | - | 3 |  |
| 331.0340Cu II | 1    | 14.43 | - | 18.17 | 4p 3D | - | 6d 3D | 3 | - | 2 |  |
| 331.2027Cu II | 20   | 14.43 | - | 18.17 | 4p 3D | - | 6d 3F | 3 | - | 4 |  |
| 331.2393Cu II | 1    | 14.43 | - | 18.17 | 4p 3D | - | 6d 3F | 3 | - | 3 |  |
| 331.2678Cu II | 6    | 14.62 | - | 18.36 | 4d 1G | - | 5f 1F | 4 | - | 3 |  |
| 331.5744Cu II | 24   | 14.62 | - | 18.35 | 4d 1G | - | 5f 3H | 4 | - | 4 |  |
| 331.6276Cu II | 1040 | 14.62 | - | 18.35 | 4d 1G | - | 5f 1H | 4 | - | 5 |  |
| 331.7139Cu II | 327  | 14.62 | - | 18.36 | 4d 3D | - | 5f 3F | 1 | - | 2 |  |
| 331.9021Cu II | 13   | 14.43 | - | 18.16 | 4p 3D | - | 6d 3D | 3 | - | 3 |  |
| 332.1553Cu II | 58   | 14.96 | - | 18.69 | 5p 3F | - | 8s 3D | 3 | - | 2 |  |
| 332.2635Cu II | 65   | 14.62 | - | 18.35 | 4d 3D | - | 5f 3D | 1 | - | 1 |  |
| 332.5021Cu II | 1    | 13.43 | - | 17.16 | 5s 3D | - | 4p 3G | 2 | - | 3 |  |
| 332.5819Cu II | 18   | 14.62 | - | 18.35 | 4d 3D | - | 5f 1D | 1 | - | 2 |  |
| 332.5924Cu II | 6    | 14.96 | - | 18.69 | 5p 3F | - | 8s 3D | 3 | - | 3 |  |
| 332.7073Cu II | 1    | 14.43 | - | 18.15 | 4p 3D | - | 6d 3G | 3 | - | 4 |  |
| 332.7916Cu II | 5    | 14.43 | - | 18.15 | 4p 3D | - | 6d 3P | 3 | - | 2 |  |
| 333.7594Cu II | 88   | 14.98 | - | 18.69 | 5p 3F | - | 8s 3D | 4 | - | 3 |  |
| 333.8036Cu II | 548  | 14.39 | - | 18.11 | 4d 3D | - | 5f 3G | 3 | - | 4 |  |
| 333.8648Cu II | 3    | 14.39 | - | 18.10 | 4d 3D | - | 5f 3F | 3 | - | 4 |  |
| 333.8936Cu II | 30   | 14.39 | - | 18.10 | 4d 3D | - | 5f 3D | 3 | - | 3 |  |
| 333.9085Cu II | 39   | 14.65 | - | 18.36 | 4d 1D | - | 5f 3G | 2 | - | 3 |  |
| 334.0041Cu II | 0    | 14.46 | - | 18.17 | 4p 3G | - | 6d 3D | 3 | - | 2 |  |
| 334.0832Cu II | 2    | 13.39 | - | 17.10 | 5s 3D | - | 4p 3P | 3 | - | 4 |  |
| 334.1759Cu II | 9    | 14.46 | - | 18.17 | 4p 3G | - | 6d 3F | 3 | - | 4 |  |
| 334.2131Cu II | 0    | 14.46 | - | 18.17 | 4p 3G | - | 6d 3F | 3 | - | 3 |  |
| 334.2800Cu II | 32   | 14.99 | - | 18.69 | 4p 1D | - | 8s 3D | 2 | - | 2 |  |
| 334.2964Cu II | 18   | 14.39 | - | 18.10 | 4d 3D | - | 5f 3D | 3 | - | 2 |  |
| 334.3214Cu II | 9    | 14.65 | - | 18.36 | 4d 1D | - | 5f 3F | 2 | - | 2 |  |

|                |     |       |   |       |        |   |       |   |   |   |
|----------------|-----|-------|---|-------|--------|---|-------|---|---|---|
| 334.3722 Cu II | 485 | 14.65 | - | 18.36 | 4d 1D  | - | 5f 1F | 2 | - | 3 |
| 334.3753 Cu II | 294 | 14.39 | - | 18.10 | 4d 3D  | - | 5f 3F | 3 | - | 3 |
| 334.7228 Cu II | 2   | 14.99 | - | 18.69 | 4p 1D  | - | 8s 3D | 2 | - | 3 |
| 334.7676 Cu II | 27  | 14.99 | - | 18.69 | 5p 3P  | - | 8s 3D | 1 | - | 2 |
| 334.8797 Cu II | 9   | 14.65 | - | 18.35 | 4d 1D  | - | 5f 3D | 2 | - | 1 |
|                |     |       |   |       |        |   |       |   |   |   |
| 334.8879 Cu II | 7   | 14.46 | - | 18.16 | 4p 3G  | - | 6d 3D | 3 | - | 3 |
| 334.9457 Cu II | 54  | 14.39 | - | 18.09 | 4d 3D  | - | 5f 3P | 3 | - | 2 |
| 335.2031 Cu II | 114 | 14.65 | - | 18.35 | 4d 1D  | - | 5f 1D | 2 | - | 2 |
| 335.4067 Cu II | 2   | 14.52 | - | 18.22 | 4p 3D  | - | 7s 1D | 2 | - | 2 |
| 335.6887 Cu II | 1   | 10.96 | - | 14.65 | 4s2 3P | - | 4p 3F | 2 | - | 3 |
|                |     |       |   |       |        |   |       |   |   |   |
| 335.7077 Cu II | 1   | 14.46 | - | 18.15 | 4p 3G  | - | 6d 3G | 3 | - | 4 |
| 335.7935 Cu II | 3   | 14.46 | - | 18.15 | 4p 3G  | - | 6d 3P | 3 | - | 2 |
| 335.9721 Cu II | 4   | 14.52 | - | 18.21 | 4p 3D  | - | 7s 3D | 2 | - | 1 |
| 336.5648 Cu II | 19  | 14.42 | - | 18.11 | 4d 3F  | - | 5f 3G | 3 | - | 4 |
| 336.6269 Cu II | 652 | 14.42 | - | 18.10 | 4d 3F  | - | 5f 3F | 3 | - | 4 |
|                |     |       |   |       |        |   |       |   |   |   |
| 336.6562 Cu II | 200 | 14.42 | - | 18.10 | 4d 3F  | - | 5f 3D | 3 | - | 3 |
| 337.0069 Cu II | 0   | 11.85 | - | 15.53 | 4s2 1G | - | 4p 5P | 4 | - | 3 |
| 337.0150 Cu II | 32  | 15.01 | - | 18.69 | 4p 1F  | - | 8s 3D | 3 | - | 3 |
| 337.0454 Cu II | 842 | 14.43 | - | 18.11 | 4d 3F  | - | 5f 3G | 4 | - | 5 |
| 337.0657 Cu II | 24  | 14.42 | - | 18.10 | 4d 3F  | - | 5f 3D | 3 | - | 2 |
|                |     |       |   |       |        |   |       |   |   |   |
| 337.0785 Cu II | 275 | 14.43 | - | 18.11 | 4d 3F  | - | 5f 3G | 4 | - | 4 |
| 337.1408 Cu II | 8   | 14.43 | - | 18.10 | 4d 3F  | - | 5f 3F | 4 | - | 4 |
| 337.1459 Cu II | 5   | 14.42 | - | 18.10 | 4d 3F  | - | 5f 3F | 3 | - | 3 |
| 337.1702 Cu II | 6   | 14.43 | - | 18.10 | 4d 3F  | - | 5f 3D | 4 | - | 3 |
| 337.3539 Cu II | 1   | 13.39 | - | 17.07 | 5s 3D  | - | 4p 1D | 3 | - | 2 |
|                |     |       |   |       |        |   |       |   |   |   |
| 337.3591 Cu II | 382 | 14.43 | - | 18.10 | 4d 3D  | - | 5f 3D | 2 | - | 3 |
| 337.4442 Cu II | 2   | 13.65 | - | 17.32 | 5s 3D  | - | 6p 3D | 1 | - | 2 |
| 337.4952 Cu II | 737 | 14.69 | - | 18.36 | 4d 1F  | - | 5f 1G | 3 | - | 4 |
| 337.5223 Cu II | 26  | 14.69 | - | 18.36 | 4d 1F  | - | 5f 3G | 3 | - | 3 |
| 337.6614 Cu II | 36  | 14.43 | - | 18.10 | 4d 3F  | - | 5f 3F | 4 | - | 3 |
|                |     |       |   |       |        |   |       |   |   |   |
| 337.7084 Cu II | 6   | 14.76 | - | 18.43 | 4p 3F  | - | 6d 3F | 2 | - | 2 |
| 337.7258 Cu II | 1   | 14.42 | - | 18.09 | 4d 3F  | - | 5f 3P | 3 | - | 2 |
| 337.7704 Cu II | 167 | 14.43 | - | 18.10 | 4d 3D  | - | 5f 3D | 2 | - | 2 |
| 337.8383 Cu II | 1   | 14.76 | - | 18.43 | 4p 3F  | - | 6d 1F | 2 | - | 3 |
| 337.8509 Cu II | 54  | 14.43 | - | 18.10 | 4d 3D  | - | 5f 3F | 2 | - | 3 |
|                |     |       |   |       |        |   |       |   |   |   |
| 337.9441 Cu II | 8   | 14.69 | - | 18.36 | 4d 1F  | - | 5f 3F | 3 | - | 2 |
| 337.9939 Cu II | 1   | 13.43 | - | 17.10 | 5s 3D  | - | 4p 3S | 2 | - | 1 |
| 337.9960 Cu II | 156 | 14.69 | - | 18.36 | 4d 1F  | - | 5f 1F | 3 | - | 3 |
| 338.0331 Cu II | 19  | 14.43 | - | 18.10 | 4d 3F  | - | 5f 3H | 4 | - | 5 |
| 338.0712 Cu II | 510 | 14.70 | - | 18.36 | 4d 3F  | - | 5f 3G | 2 | - | 3 |
|                |     |       |   |       |        |   |       |   |   |   |
| 338.1103 Cu II | 24  | 14.43 | - | 18.10 | 4d 3D  | - | 5f 1P | 2 | - | 1 |
| 338.3152 Cu II | 1   | 14.69 | - | 18.35 | 4d 1F  | - | 5f 3H | 3 | - | 4 |

|                |     |       |   |       |        |   |       |   |   |   |
|----------------|-----|-------|---|-------|--------|---|-------|---|---|---|
| 338.4332 Cu II | 26  | 14.43 | - | 18.09 | 4d 3D  | - | 5f 3P | 2 | - | 2 |
| 338.4945 Cu II | 135 | 14.70 | - | 18.36 | 4d 3F  | - | 5f 3F | 2 | - | 2 |
| 338.5465 Cu II | 10  | 14.70 | - | 18.36 | 4d 3F  | - | 5f 1F | 2 | - | 3 |
| 338.7352 Cu II | 1   | 14.43 | - | 18.09 | 4d 3D  | - | 5f 3P | 2 | - | 1 |
| 338.8451 Cu II | 9   | 14.69 | - | 18.35 | 4d 1F  | - | 5f 1D | 3 | - | 2 |
| 339.0668 Cu II | 11  | 14.70 | - | 18.35 | 4d 3F  | - | 5f 3D | 2 | - | 1 |
| 339.0935 Cu II | 1   | 14.76 | - | 18.41 | 4p 3F  | - | 6d 3D | 2 | - | 1 |
| 339.2744 Cu II | 1   | 10.99 | - | 14.64 | 4s2 3P | - | 4p 3D | 1 | - | 1 |
| 339.3984 Cu II | 5   | 14.70 | - | 18.35 | 4d 3F  | - | 5f 1D | 2 | - | 2 |
| 339.3991 Cu II | 0   | 14.30 | - | 17.95 | 4p 3G  | - | 7s 3D | 4 | - | 3 |
| 339.5216 Cu II | 10  | 14.52 | - | 18.17 | 4p 3D  | - | 6d 3D | 2 | - | 2 |
| 339.5519 Cu II | 17  | 14.76 | - | 18.41 | 4p 3F  | - | 6d 3G | 2 | - | 3 |
| 339.7375 Cu II | 16  | 14.52 | - | 18.17 | 4p 3D  | - | 6d 3F | 2 | - | 3 |
| 340.2830 Cu II | 63  | 14.45 | - | 18.10 | 4d 3P  | - | 5f 1P | 0 | - | 1 |
| 340.3285 Cu II | 1   | 13.68 | - | 17.33 | 5s 1D  | - | 6p 3D | 2 | - | 3 |
| 340.4349 Cu II | 1   | 14.52 | - | 18.16 | 4p 3D  | - | 6d 3D | 2 | - | 3 |
| 340.6835 Cu II | 0   | 13.68 | - | 17.32 | 5s 1D  | - | 6p 3D | 2 | - | 2 |
| 340.9160 Cu II | 15  | 14.45 | - | 18.09 | 4d 3P  | - | 5f 3P | 0 | - | 1 |
| 340.9442 Cu II | 1   | 14.76 | - | 18.39 | 4p 3F  | - | 6d 1P | 2 | - | 1 |
| 341.0455 Cu II | 1   | 13.43 | - | 17.07 | 5s 3D  | - | 4p 1D | 2 | - | 2 |
| 341.2270 Cu II | 5   | 14.52 | - | 18.15 | 4p 3D  | - | 6d 3P | 2 | - | 1 |
| 341.3707 Cu II | 4   | 14.52 | - | 18.15 | 4p 3D  | - | 6d 3P | 2 | - | 2 |
| 341.6936 Cu II | 11  | 15.07 | - | 18.69 | 5p 3D  | - | 8s 3D | 3 | - | 2 |
| 342.1562 Cu II | 31  | 15.07 | - | 18.69 | 5p 3D  | - | 8s 3D | 3 | - | 3 |
| 342.8766 Cu II | 1   | 13.65 | - | 17.26 | 5s 3D  | - | 6p 3P | 1 | - | 1 |
| 343.0101 Cu II | 1   | 11.03 | - | 14.64 | 4s2 3P | - | 4p 3D | 0 | - | 1 |
| 343.7178 Cu II | 2   | 14.52 | - | 18.13 | 4p 3D  | - | 6d 3S | 2 | - | 1 |
| 343.9774 Cu II | 1   | 13.39 | - | 17.00 | 5s 3D  | - | 4p 3G | 3 | - | 3 |
| 344.4137 Cu II | 2   | 14.64 | - | 18.24 | 4p 3D  | - | 6d 3P | 1 | - | 0 |
| 345.1454 Cu II | 1   | 13.68 | - | 17.28 | 5s 1D  | - | 6p 3F | 2 | - | 3 |
| 345.3931 Cu II | 1   | 13.65 | - | 17.24 | 5s 3D  | - | 4p 3D | 1 | - | 2 |
| 346.0044 Cu II | 14  | 14.59 | - | 18.17 | 4p 3F  | - | 6d 3F | 4 | - | 4 |
| 346.0443 Cu II | 1   | 14.59 | - | 18.17 | 4p 3F  | - | 6d 3F | 4 | - | 3 |
| 346.1952 Cu II | 1   | 13.43 | - | 17.01 | 5s 3D  | - | 4p 1P | 2 | - | 1 |
| 346.3410 Cu II | 2   | 14.64 | - | 18.22 | 4p 3D  | - | 7s 1D | 1 | - | 2 |
| 346.7679 Cu II | 3   | 14.59 | - | 18.16 | 4p 3F  | - | 6d 3D | 4 | - | 3 |
| 346.9439 Cu II | 6   | 14.64 | - | 18.21 | 4p 3D  | - | 7s 3D | 1 | - | 1 |
| 347.1155 Cu II | 12  | 15.12 | - | 18.69 | 5p 3D  | - | 8s 3D | 2 | - | 2 |
| 347.2028 Cu II | 1   | 14.65 | - | 18.22 | 4p 3F  | - | 7s 1D | 3 | - | 2 |
| 347.3002 Cu II | 2   | 13.39 | - | 16.96 | 5s 3D  | - | 4p 3F | 3 | - | 2 |
| 347.5049 Cu II | 1   | 10.96 | - | 14.52 | 4s2 3P | - | 4p 3D | 2 | - | 2 |
| 347.5929 Cu II | 1   | 15.12 | - | 18.69 | 5p 3D  | - | 8s 3D | 2 | - | 3 |



|               |    |       |   |       |        |   |       |   |   |   |
|---------------|----|-------|---|-------|--------|---|-------|---|---|---|
| 347.6469Cu II | 3  | 14.59 | - | 18.15 | 4p 3F  | - | 6d 3G | 4 | - | 4 |
| 347.8163Cu II | 0  | 13.43 | - | 17.00 | 5s 3D  | - | 4p 3G | 2 | - | 3 |
| 347.8949Cu II | 52 | 14.59 | - | 18.15 | 4p 3F  | - | 6d 3G | 4 | - | 5 |
| 348.3830Cu II | 8  | 14.53 | - | 18.09 | 4d 1P  | - | 5f 3P | 1 | - | 2 |
| 348.7029Cu II | 11 | 14.53 | - | 18.09 | 4d 1P  | - | 5f 3P | 1 | - | 1 |
| 348.7875Cu II | 0  | 13.68 | - | 17.24 | 5s 1D  | - | 4p 3D | 2 | - | 2 |
| 348.8437Cu II | 5  | 14.53 | - | 18.09 | 4d 1P  | - | 5f 3P | 1 | - | 0 |
| 350.1613Cu II | 1  | 14.89 | - | 18.43 | 5p 3P  | - | 6d 3F | 2 | - | 2 |
| 350.3010Cu II | 4  | 14.89 | - | 18.43 | 5p 3P  | - | 6d 1F | 2 | - | 3 |
| 350.4664Cu II | 2  | 10.99 | - | 14.52 | 4s2 3P | - | 4p 3D | 1 | - | 2 |
| 350.6836Cu II | 3  | 14.43 | - | 17.96 | 4p 3D  | - | 7s 3D | 3 | - | 2 |
| 350.7302Cu II | 2  | 14.64 | - | 18.17 | 4p 3D  | - | 6d 3D | 1 | - | 2 |
| 351.1764Cu II | 2  | 14.89 | - | 18.42 | 5p 3P  | - | 6d 1D | 2 | - | 2 |
| 351.2140Cu II | 8  | 13.43 | - | 16.96 | 5s 3D  | - | 4p 3F | 2 | - | 2 |
| 351.5230Cu II | 9  | 14.43 | - | 17.95 | 4p 3D  | - | 7s 3D | 3 | - | 3 |
| 351.6140Cu II | 2  | 14.65 | - | 18.17 | 4p 3F  | - | 6d 3D | 3 | - | 2 |
| 351.6506Cu II | 1  | 14.89 | - | 18.41 | 5p 3P  | - | 6d 3D | 2 | - | 1 |
| 351.6780Cu II | 2  | 13.39 | - | 16.92 | 5s 3D  | - | 4p 3D | 3 | - | 3 |
| 351.8044Cu II | 4  | 14.65 | - | 18.17 | 4p 3F  | - | 6d 3F | 3 | - | 4 |
| 351.8457Cu II | 14 | 14.65 | - | 18.17 | 4p 3F  | - | 6d 3F | 3 | - | 3 |
| 352.1437Cu II | 0  | 14.89 | - | 18.41 | 5p 3P  | - | 6d 3G | 2 | - | 3 |
| 352.5504Cu II | 2  | 14.64 | - | 18.15 | 4p 3D  | - | 6d 3P | 1 | - | 1 |
| 352.5937Cu II | 11 | 14.65 | - | 18.16 | 4p 3F  | - | 6d 3D | 3 | - | 3 |
| 353.4808Cu II | 1  | 14.60 | - | 18.11 | 4d 3G  | - | 5f 3G | 3 | - | 4 |
| 353.4814Cu II | 1  | 10.96 | - | 14.46 | 4s2 3P | - | 4p 3G | 2 | - | 3 |
| 353.5025Cu II | 49 | 14.65 | - | 18.15 | 4p 3F  | - | 6d 3G | 3 | - | 4 |
| 353.5493Cu II | 32 | 14.60 | - | 18.10 | 4d 3G  | - | 5f 3F | 3 | - | 4 |
| 353.5816Cu II | 12 | 14.60 | - | 18.10 | 4d 3G  | - | 5f 3D | 3 | - | 3 |
| 353.5976Cu II | 6  | 14.65 | - | 18.15 | 4p 3F  | - | 6d 3P | 3 | - | 2 |
| 353.6413Cu II | 1  | 14.89 | - | 18.39 | 5p 3P  | - | 6d 1P | 2 | - | 1 |
| 354.0186Cu II | 1  | 14.46 | - | 17.96 | 4p 3G  | - | 7s 3D | 3 | - | 2 |
| 354.0334Cu II | 2  | 14.60 | - | 18.10 | 4d 3G  | - | 5f 3D | 3 | - | 2 |
| 354.1219Cu II | 1  | 14.60 | - | 18.10 | 4d 3G  | - | 5f 3F | 3 | - | 3 |
| 354.8741Cu II | 6  | 14.46 | - | 17.95 | 4p 3G  | - | 7s 3D | 3 | - | 3 |
| 355.1489Cu II | 21 | 14.62 | - | 18.11 | 4d 1G  | - | 5f 3G | 4 | - | 5 |
| 355.1857Cu II | 9  | 14.62 | - | 18.11 | 4d 1G  | - | 5f 3G | 4 | - | 4 |
| 355.2099Cu II | 1  | 14.64 | - | 18.13 | 4p 3D  | - | 6d 3S | 1 | - | 1 |
| 355.2549Cu II | 3  | 14.62 | - | 18.10 | 4d 1G  | - | 5f 3F | 4 | - | 4 |
| 355.2875Cu II | 1  | 14.62 | - | 18.10 | 4d 1G  | - | 5f 3D | 4 | - | 3 |
| 355.6917Cu II | 0  | 13.43 | - | 16.92 | 5s 3D  | - | 4p 3D | 2 | - | 3 |
| 355.8330Cu II | 2  | 14.62 | - | 18.10 | 4d 1G  | - | 5f 3F | 4 | - | 3 |

|               |    |       |   |       |        |   |       |   |   |   |
|---------------|----|-------|---|-------|--------|---|-------|---|---|---|
| 356.2458Cu II | 5  | 14.62 | - | 18.10 | 4d 1G  | - | 5f 3H | 4 | - | 5 |
| 356.3158Cu II | 1  | 14.62 | - | 18.10 | 4d 3D  | - | 5f 3D | 1 | - | 2 |
| 356.5759Cu II | 2  | 15.22 | - | 18.69 | 5p 3F  | - | 8s 3D | 2 | - | 2 |
| 356.5851Cu II | 2  | 13.68 | - | 17.16 | 5s 1D  | - | 4p 3G | 2 | - | 3 |
| 356.6940Cu II | 1  | 14.62 | - | 18.10 | 4d 3D  | - | 5f 1P | 1 | - | 1 |
|               |    |       |   |       |        |   |       |   |   |   |
| 356.8701Cu II | 2  | 10.96 | - | 14.43 | 4s2 3P | - | 4p 3D | 2 | - | 3 |
| 357.0535Cu II | 1  | 14.62 | - | 18.09 | 4d 3D  | - | 5f 3P | 1 | - | 2 |
| 357.0797Cu II | 1  | 15.22 | - | 18.69 | 5p 3F  | - | 8s 3D | 2 | - | 3 |
| 357.5375Cu II | 1  | 14.62 | - | 18.09 | 4d 3D  | - | 5f 3P | 1 | - | 0 |
| 357.8406Cu II | 1  | 13.39 | - | 16.86 | 5s 3D  | - | 4p 5S | 3 | - | 2 |
|               |    |       |   |       |        |   |       |   |   |   |
| 358.1317Cu II | 4  | 15.23 | - | 18.69 | 5p 1P  | - | 8s 3D | 1 | - | 2 |
| 358.3632Cu II | 3  | 14.76 | - | 18.22 | 4p 3F  | - | 7s 1D | 2 | - | 2 |
| 358.6390Cu II | 0  | 14.96 | - | 18.42 | 5p 3F  | - | 6d 1D | 3 | - | 2 |
| 358.8608Cu II | 10 | 14.65 | - | 18.10 | 4d 1D  | - | 5f 3D | 2 | - | 3 |
| 359.0088Cu II | 5  | 14.76 | - | 18.21 | 4p 3F  | - | 7s 3D | 2 | - | 1 |
|               |    |       |   |       |        |   |       |   |   |   |
| 359.0764Cu II | 0  | 14.98 | - | 18.43 | 5p 3F  | - | 6d 1F | 4 | - | 3 |
| 359.2113Cu II | 1  | 14.96 | - | 18.41 | 5p 3F  | - | 6d 1G | 3 | - | 4 |
| 359.2352Cu II | 11 | 13.65 | - | 17.10 | 5s 3D  | - | 4p 3S | 1 | - | 1 |
| 359.3261Cu II | 3  | 14.65 | - | 18.10 | 4d 1D  | - | 5f 3D | 2 | - | 2 |
| 359.3534Cu II | 1  | 13.39 | - | 16.84 | 5s 3D  | - | 4p 3F | 3 | - | 4 |
|               |    |       |   |       |        |   |       |   |   |   |
| 359.4173Cu II | 7  | 14.65 | - | 18.10 | 4d 1D  | - | 5f 3F | 2 | - | 3 |
| 359.6478Cu II | 1  | 14.96 | - | 18.41 | 5p 3F  | - | 6d 3G | 3 | - | 3 |
| 359.7108Cu II | 1  | 14.65 | - | 18.10 | 4d 1D  | - | 5f 1P | 2 | - | 1 |
| 360.0183Cu II | 0  | 13.55 | - | 16.99 | 4p 5D  | - | 5d 3F | 3 | - | 4 |
| 360.0439Cu II | 6  | 14.99 | - | 18.43 | 4p 1D  | - | 6d 3F | 2 | - | 2 |
|               |    |       |   |       |        |   |       |   |   |   |
| 360.0547Cu II | 1  | 15.25 | - | 18.69 | 5p 1F  | - | 8s 3D | 3 | - | 2 |
| 360.0764Cu II | 5  | 14.65 | - | 18.09 | 4d 1D  | - | 5f 3P | 2 | - | 2 |
| 360.1916Cu II | 24 | 14.99 | - | 18.43 | 4p 1D  | - | 6d 1F | 2 | - | 3 |
| 360.2232Cu II | 8  | 14.52 | - | 17.96 | 4p 3D  | - | 7s 3D | 2 | - | 2 |
| 360.4182Cu II | 1  | 14.65 | - | 18.09 | 4d 1D  | - | 5f 3P | 2 | - | 1 |
|               |    |       |   |       |        |   |       |   |   |   |
| 360.5684Cu II | 1  | 15.25 | - | 18.69 | 5p 1F  | - | 8s 3D | 3 | - | 3 |
| 360.5729Cu II | 1  | 14.98 | - | 18.41 | 5p 3F  | - | 6d 1G | 4 | - | 4 |
| 360.6096Cu II | 1  | 14.99 | - | 18.43 | 5p 3P  | - | 6d 3F | 1 | - | 2 |
| 360.6659Cu II | 18 | 13.39 | - | 16.83 | 5s 3D  | - | 4p 3F | 3 | - | 3 |
| 361.1090Cu II | 3  | 14.52 | - | 17.95 | 4p 3D  | - | 7s 3D | 2 | - | 3 |
|               |    |       |   |       |        |   |       |   |   |   |
| 361.1173Cu II | 11 | 14.99 | - | 18.42 | 4p 1D  | - | 6d 1D | 2 | - | 2 |
| 361.6187Cu II | 1  | 14.99 | - | 18.41 | 4p 1D  | - | 6d 3D | 2 | - | 1 |
| 361.6478Cu II | 0  | 13.55 | - | 16.98 | 4p 5D  | - | 5d 3D | 3 | - | 3 |
| 361.6863Cu II | 26 | 14.99 | - | 18.42 | 5p 3P  | - | 6d 1D | 1 | - | 2 |
| 361.9970Cu II | 0  | 13.43 | - | 16.86 | 5s 3D  | - | 4p 5S | 2 | - | 2 |
|               |    |       |   |       |        |   |       |   |   |   |
| 362.1401Cu II | 1  | 14.99 | - | 18.41 | 4p 1D  | - | 6d 3G | 2 | - | 3 |
| 362.1893Cu II | 2  | 14.99 | - | 18.41 | 5p 3P  | - | 6d 3D | 1 | - | 1 |

|               |    |       |   |       |        |   |       |   |   |   |
|---------------|----|-------|---|-------|--------|---|-------|---|---|---|
| 362.6310Cu II | 2  | 14.75 | - | 18.17 | 4p 1G  | - | 6d 3F | 4 | - | 4 |
| 362.6748Cu II | 0  | 14.75 | - | 18.17 | 4p 1G  | - | 6d 3F | 4 | - | 3 |
| 362.6844Cu II | 1  | 13.65 | - | 17.07 | 5s 3D  | - | 4p 1D | 1 | - | 2 |
| 362.6975Cu II | 2  | 15.01 | - | 18.43 | 4p 1F  | - | 6d 3F | 3 | - | 2 |
| 362.8474Cu II | 15 | 15.01 | - | 18.43 | 4p 1F  | - | 6d 1F | 3 | - | 3 |
| 362.9087Cu II | 2  | 13.68 | - | 17.10 | 5s 1D  | - | 4p 3S | 2 | - | 1 |
| 362.9318Cu II | 5  | 14.69 | - | 18.11 | 4d 1F  | - | 5f 3G | 3 | - | 4 |
| 363.0382Cu II | 1  | 14.69 | - | 18.10 | 4d 1F  | - | 5f 3D | 3 | - | 3 |
| 363.0646Cu II | 9  | 14.76 | - | 18.17 | 4p 3F  | - | 6d 3D | 2 | - | 2 |
| 363.3115Cu II | 17 | 14.76 | - | 18.17 | 4p 3F  | - | 6d 3F | 2 | - | 3 |
| 363.4697Cu II | 1  | 14.75 | - | 18.16 | 4p 1G  | - | 6d 3D | 4 | - | 3 |
| 363.5144Cu II | 1  | 14.69 | - | 18.10 | 4d 1F  | - | 5f 3D | 3 | - | 2 |
| 363.6077Cu II | 2  | 14.69 | - | 18.10 | 4d 1F  | - | 5f 3F | 3 | - | 3 |
| 363.6733Cu II | 0  | 14.70 | - | 18.10 | 4d 3F  | - | 5f 3D | 2 | - | 3 |
| 363.7242Cu II | 3  | 14.99 | - | 18.39 | 4p 1D  | - | 6d 1P | 2 | - | 1 |
| 363.7868Cu II | 1  | 15.01 | - | 18.42 | 4p 1F  | - | 6d 1D | 3 | - | 2 |
| 364.1092Cu II | 1  | 14.76 | - | 18.16 | 4p 3F  | - | 6d 3D | 2 | - | 3 |
| 364.1792Cu II | 4  | 11.85 | - | 15.25 | 4s2 1G | - | 5p 1F | 4 | - | 3 |
| 364.2448Cu II | 1  | 14.70 | - | 18.10 | 4d 3F  | - | 5f 3F | 2 | - | 3 |
| 364.2823Cu II | 1  | 14.69 | - | 18.09 | 4d 1F  | - | 5f 3P | 3 | - | 2 |
| 364.3015Cu II | 19 | 14.99 | - | 18.39 | 5p 3P  | - | 6d 1P | 1 | - | 1 |
| 364.3756Cu II | 51 | 15.01 | - | 18.41 | 4p 1F  | - | 6d 1G | 3 | - | 4 |
| 364.4355Cu II | 1  | 14.75 | - | 18.15 | 4p 1G  | - | 6d 3G | 4 | - | 4 |
| 364.7080Cu II | 5  | 14.75 | - | 18.15 | 4p 1G  | - | 6d 3G | 4 | - | 5 |
| 364.8248Cu II | 3  | 15.01 | - | 18.41 | 4p 1F  | - | 6d 3G | 3 | - | 3 |
| 364.8886Cu II | 4  | 13.43 | - | 16.83 | 5s 3D  | - | 4p 3F | 2 | - | 3 |
| 364.9218Cu II | 1  | 14.70 | - | 18.09 | 4d 3F  | - | 5f 3P | 2 | - | 2 |
| 365.0154Cu II | 5  | 14.76 | - | 18.15 | 4p 3F  | - | 6d 3P | 2 | - | 1 |
| 365.1799Cu II | 5  | 14.76 | - | 18.15 | 4p 3F  | - | 6d 3P | 2 | - | 2 |
| 365.2728Cu II | 1  | 14.70 | - | 18.09 | 4d 3F  | - | 5f 3P | 2 | - | 1 |
| 366.4291Cu II | 4  | 13.68 | - | 17.07 | 5s 1D  | - | 4p 1D | 2 | - | 2 |
| 367.1963Cu II | 1  | 15.32 | - | 18.69 | 5p 1D  | - | 8s 3D | 2 | - | 2 |
| 367.7306Cu II | 1  | 15.32 | - | 18.69 | 5p 1D  | - | 8s 3D | 2 | - | 3 |
| 367.8670Cu II | 2  | 14.76 | - | 18.13 | 4p 3F  | - | 6d 3S | 2 | - | 1 |
| 368.2425Cu II | 21 | 14.59 | - | 17.95 | 4p 3F  | - | 7s 3D | 4 | - | 3 |
| 368.5139Cu II | 0  | 13.65 | - | 17.01 | 5s 3D  | - | 4p 1P | 1 | - | 1 |
| 368.6555Cu II | 1  | 15.07 | - | 18.43 | 5p 3D  | - | 6d 3F | 3 | - | 2 |
| 368.8138Cu II | 4  | 15.07 | - | 18.43 | 5p 3D  | - | 6d 1F | 3 | - | 3 |
| 369.7844Cu II | 1  | 15.07 | - | 18.42 | 5p 3D  | - | 6d 1D | 3 | - | 2 |
| 369.8435Cu II | 0  | 14.20 | - | 17.55 | 4d 3S  | - | 6p 1D | 1 | - | 2 |
| 370.3928Cu II | 24 | 15.07 | - | 18.41 | 5p 3D  | - | 6d 1G | 3 | - | 4 |
| 370.8570Cu II | 1  | 15.07 | - | 18.41 | 5p 3D  | - | 6d 3G | 3 | - | 3 |

|               |     |       |   |       |        |   |       |   |   |   |
|---------------|-----|-------|---|-------|--------|---|-------|---|---|---|
| 372.3806Cu II | 5   | 13.68 | - | 17.01 | 5s 1D  | - | 4p 1P | 2 | - | 1 |
| 372.4176Cu II | 2   | 14.89 | - | 18.22 | 5p 3P  | - | 7s 1D | 2 | - | 2 |
| 372.8658Cu II | 2   | 14.64 | - | 17.96 | 4p 3D  | - | 7s 3D | 1 | - | 2 |
| 373.0344Cu II | 2   | 13.43 | - | 16.75 | 5s 3D  | - | 4p 3D | 2 | - | 1 |
| 373.1148Cu II | 1   | 14.89 | - | 18.21 | 5p 3P  | - | 7s 3D | 2 | - | 1 |
| 373.8648Cu II | 12  | 14.65 | - | 17.96 | 4p 3F  | - | 7s 3D | 3 | - | 2 |
| 373.9583Cu II | 0   | 14.20 | - | 17.51 | 4d 3S  | - | 6p 3D | 1 | - | 1 |
| 374.0329Cu II | 3   | 13.39 | - | 16.71 | 5s 3D  | - | 4p 3H | 3 | - | 4 |
| 374.2059Cu II | 6   | 13.65 | - | 16.96 | 5s 3D  | - | 4p 3F | 1 | - | 2 |
| 374.2568Cu II | 1   | 13.68 | - | 17.00 | 5s 1D  | - | 4p 3G | 2 | - | 3 |
| 374.8190Cu II | 12  | 14.65 | - | 17.95 | 4p 3F  | - | 7s 3D | 3 | - | 3 |
| 374.8318Cu II | 0   | 13.68 | - | 16.99 | 4p 5D  | - | 5d 3F | 2 | - | 3 |
| 374.9776Cu II | 2   | 13.39 | - | 16.70 | 5s 3D  | - | 4p 3D | 3 | - | 2 |
| 374.9783Cu II | 60  | 15.12 | - | 18.43 | 5p 3D  | - | 6d 3F | 2 | - | 2 |
| 375.1385Cu II | 48  | 15.12 | - | 18.43 | 5p 3D  | - | 6d 1F | 2 | - | 3 |
| 376.1427Cu II | 11  | 15.12 | - | 18.42 | 5p 3D  | - | 6d 1D | 2 | - | 2 |
| 376.6867Cu II | 10  | 15.12 | - | 18.41 | 5p 3D  | - | 6d 3D | 2 | - | 1 |
| 377.2526Cu II | 85  | 15.12 | - | 18.41 | 5p 3D  | - | 6d 3G | 2 | - | 3 |
| 377.4975Cu II | 14  | 14.89 | - | 18.17 | 5p 3P  | - | 6d 3D | 2 | - | 2 |
| 377.7645Cu II | 4   | 14.89 | - | 18.17 | 5p 3P  | - | 6d 3F | 2 | - | 3 |
| 378.1936Cu II | 6   | 13.68 | - | 16.96 | 5s 1D  | - | 4p 3F | 2 | - | 2 |
| 378.6270Cu II | 191 | 14.89 | - | 18.16 | 5p 3P  | - | 6d 3D | 2 | - | 3 |
| 378.9719Cu II | 8   | 15.12 | - | 18.39 | 5p 3D  | - | 6d 1P | 2 | - | 1 |
| 379.5442Cu II | 2   | 13.43 | - | 16.70 | 5s 3D  | - | 4p 3D | 2 | - | 2 |
| 379.6070Cu II | 25  | 14.89 | - | 18.15 | 5p 3P  | - | 6d 3P | 2 | - | 1 |
| 379.6169Cu II | 69  | 15.23 | - | 18.50 | 5p 1P  | - | 6d 1S | 1 | - | 0 |
| 379.7849Cu II | 286 | 14.89 | - | 18.15 | 5p 3P  | - | 6d 3P | 2 | - | 2 |
| 380.1556Cu II | 92  | 15.15 | - | 18.41 | 5p 3P  | - | 6d 3D | 0 | - | 1 |
| 380.8210Cu II | 1   | 14.96 | - | 18.22 | 5p 3F  | - | 7s 1D | 3 | - | 2 |
| 381.8879Cu II | 88  | 14.99 | - | 18.24 | 5p 3P  | - | 6d 3P | 1 | - | 0 |
| 382.4832Cu II | 61  | 15.15 | - | 18.39 | 5p 3P  | - | 6d 1P | 0 | - | 1 |
| 382.6921Cu II | 234 | 14.89 | - | 18.13 | 5p 3P  | - | 6d 3S | 2 | - | 1 |
| 383.4883Cu II | 0   | 14.34 | - | 17.57 | 4d 3P  | - | 6p 3F | 1 | - | 2 |
| 383.6165Cu II | 13  | 14.99 | - | 18.22 | 4p 1D  | - | 7s 1D | 2 | - | 2 |
| 384.1482Cu II | 3   | 13.43 | - | 16.66 | 5s 3D  | - | 4p 3P | 2 | - | 1 |
| 384.2587Cu II | 8   | 14.99 | - | 18.22 | 5p 3P  | - | 7s 1D | 1 | - | 2 |
| 384.3564Cu II | 1   | 14.99 | - | 18.21 | 4p 1D  | - | 7s 3D | 2 | - | 1 |
| 384.9582Cu II | 24  | 13.39 | - | 16.61 | 5s 3D  | - | 4p 3D | 3 | - | 3 |
| 385.0010Cu II | 5   | 14.99 | - | 18.21 | 5p 3P  | - | 7s 3D | 1 | - | 1 |
| 385.1103Cu II | 5   | 11.85 | - | 15.07 | 4s2 1G | - | 5p 3D | 4 | - | 3 |
| 385.9432Cu II | 0   | 14.34 | - | 17.55 | 4d 3P  | - | 6p 1D | 2 | - | 2 |

|               |     |       |   |       |        |   |       |   |   |   |
|---------------|-----|-------|---|-------|--------|---|-------|---|---|---|
| 386.0240Cu II | 23  | 15.29 | - | 18.50 | 5p 3D  | - | 6d 1S | 1 | - | 0 |
| 386.0425Cu II | 65  | 15.22 | - | 18.43 | 5p 3F  | - | 6d 3F | 2 | - | 2 |
| 386.1344Cu II | 25  | 14.96 | - | 18.17 | 5p 3F  | - | 6d 3D | 3 | - | 2 |
| 386.2124Cu II | 50  | 15.22 | - | 18.43 | 5p 3F  | - | 6d 1F | 2 | - | 3 |
| 386.3362Cu II | 1   | 14.34 | - | 17.55 | 4d 3P  | - | 6p 1D | 1 | - | 2 |
| 386.3640Cu II | 26  | 14.96 | - | 18.17 | 5p 3F  | - | 6d 3F | 3 | - | 4 |
| 386.4137Cu II | 191 | 14.96 | - | 18.17 | 5p 3F  | - | 6d 3F | 3 | - | 3 |
| 386.6304Cu II | 19  | 15.01 | - | 18.22 | 4p 1F  | - | 7s 1D | 3 | - | 2 |
| 386.8371Cu II | 7   | 14.76 | - | 17.96 | 4p 3F  | - | 7s 3D | 2 | - | 2 |
| 387.1332Cu II | 2   | 14.75 | - | 17.95 | 4p 1G  | - | 7s 3D | 4 | - | 3 |
| 387.2768Cu II | 34  | 15.22 | - | 18.42 | 5p 3F  | - | 6d 1D | 2 | - | 2 |
| 387.3161Cu II | 6   | 14.96 | - | 18.16 | 5p 3F  | - | 6d 3D | 3 | - | 3 |
| 387.3207Cu II | 9   | 13.39 | - | 16.59 | 5s 3D  | - | 4p 3P | 3 | - | 2 |
| 387.8535Cu II | 8   | 15.22 | - | 18.41 | 5p 3F  | - | 6d 3D | 2 | - | 1 |
| 387.8588Cu II | 3   | 14.76 | - | 17.95 | 4p 3F  | - | 7s 3D | 2 | - | 3 |
| 387.8667Cu II | 4   | 15.23 | - | 18.43 | 5p 1P  | - | 6d 3F | 1 | - | 2 |
| 387.9397Cu II | 239 | 14.98 | - | 18.17 | 5p 3F  | - | 6d 3F | 4 | - | 4 |
| 387.9898Cu II | 3   | 14.98 | - | 18.17 | 5p 3F  | - | 6d 3F | 4 | - | 3 |
| 388.4131Cu II | 658 | 14.96 | - | 18.15 | 5p 3F  | - | 6d 3G | 3 | - | 4 |
| 388.4534Cu II | 488 | 15.22 | - | 18.41 | 5p 3F  | - | 6d 3G | 2 | - | 3 |
| 388.5279Cu II | 10  | 14.96 | - | 18.15 | 5p 3F  | - | 6d 3P | 3 | - | 2 |
| 388.8996Cu II | 51  | 14.98 | - | 18.16 | 5p 3F  | - | 6d 3D | 4 | - | 3 |
| 389.0087Cu II | 174 | 14.99 | - | 18.17 | 4p 1D  | - | 6d 3D | 2 | - | 2 |
| 389.1127Cu II | 182 | 15.23 | - | 18.42 | 5p 1P  | - | 6d 1D | 1 | - | 2 |
| 389.2924Cu II | 285 | 14.99 | - | 18.17 | 4p 1D  | - | 6d 3F | 2 | - | 3 |
| 389.6691Cu II | 140 | 14.99 | - | 18.17 | 5p 3P  | - | 6d 3D | 1 | - | 2 |
| 389.6949Cu II | 10  | 15.23 | - | 18.41 | 5p 1P  | - | 6d 3D | 1 | - | 1 |
| 389.7726Cu II | 2   | 13.43 | - | 16.61 | 5s 3D  | - | 4p 3D | 2 | - | 3 |
| 390.0056Cu II | 47  | 14.98 | - | 18.15 | 5p 3F  | - | 6d 3G | 4 | - | 4 |
| 390.1233Cu II | 16  | 15.25 | - | 18.43 | 5p 1F  | - | 6d 3F | 3 | - | 2 |
| 390.2082Cu II | 2   | 14.99 | - | 18.16 | 4p 1D  | - | 6d 3D | 2 | - | 3 |
| 390.2766Cu II | 1   | 15.22 | - | 18.39 | 5p 3F  | - | 6d 1P | 2 | - | 1 |
| 390.2968Cu II | 154 | 15.25 | - | 18.43 | 5p 1F  | - | 6d 1F | 3 | - | 3 |
| 390.3177Cu II | 925 | 14.98 | - | 18.15 | 5p 3F  | - | 6d 3G | 4 | - | 5 |
| 390.5114Cu II | 67  | 15.18 | - | 18.35 | 4d 1S  | - | 5f 3D | 0 | - | 1 |
| 390.7264Cu II | 1   | 13.68 | - | 16.86 | 5s 1D  | - | 4p 5S | 2 | - | 2 |
| 390.8284Cu II | 1   | 14.34 | - | 17.51 | 4d 3P  | - | 6p 3D | 1 | - | 1 |
| 391.2491Cu II | 53  | 14.99 | - | 18.15 | 4p 1D  | - | 6d 3P | 2 | - | 1 |
| 391.3838Cu II | 12  | 15.25 | - | 18.42 | 5p 1F  | - | 6d 1D | 3 | - | 2 |
| 391.4306Cu II | 2   | 14.34 | - | 17.51 | 4d 3G  | - | 6p 1F | 4 | - | 3 |
| 391.4381Cu II | 9   | 14.99 | - | 18.15 | 4p 1D  | - | 6d 3P | 2 | - | 2 |
| 391.8381Cu II | 5   | 11.85 | - | 15.01 | 4s2 1G | - | 4p 1F | 4 | - | 3 |

|                |     |       |   |       |        |   |       |   |   |   |
|----------------|-----|-------|---|-------|--------|---|-------|---|---|---|
| 391.9172 Cu II | 144 | 14.99 | - | 18.15 | 5p 3P  | - | 6d 3P | 1 | - | 1 |
| 391.9360 Cu II | 0   | 13.79 | - | 16.95 | 4p 5G  | - | 5d 3G | 4 | - | 5 |
| 392.0654 Cu II | 727 | 15.25 | - | 18.41 | 5p 1F  | - | 6d 1G | 3 | - | 4 |
| 392.1412 Cu II | 147 | 15.23 | - | 18.39 | 5p 1P  | - | 6d 1P | 1 | - | 1 |
| 392.1948 Cu II | 0   | 13.43 | - | 16.59 | 5s 3D  | - | 4p 3P | 2 | - | 2 |
| 392.3450 Cu II | 202 | 15.01 | - | 18.17 | 4p 1F  | - | 6d 3F | 3 | - | 4 |
| 392.3963 Cu II | 7   | 15.01 | - | 18.17 | 4p 1F  | - | 6d 3F | 3 | - | 3 |
| 392.5856 Cu II | 34  | 15.25 | - | 18.41 | 5p 1F  | - | 6d 3G | 3 | - | 3 |
| 393.3268 Cu II | 168 | 15.01 | - | 18.16 | 4p 1F  | - | 6d 3D | 3 | - | 3 |
| 393.4119 Cu II | 7   | 15.07 | - | 18.22 | 5p 3D  | - | 7s 1D | 3 | - | 2 |
| 393.4614 Cu II | 1   | 14.42 | - | 17.57 | 4d 3F  | - | 6p 3F | 3 | - | 2 |
| 393.5956 Cu II | 3   | 13.65 | - | 16.80 | 5s 3D  | - | 4p 3P | 1 | - | 0 |
| 394.0972 Cu II | 3   | 13.68 | - | 16.83 | 5s 1D  | - | 4p 3F | 2 | - | 3 |
| 394.4219 Cu II | 0   | 14.43 | - | 17.57 | 4d 3D  | - | 6p 3F | 2 | - | 2 |
| 394.4582 Cu II | 32  | 15.01 | - | 18.15 | 4p 1F  | - | 6d 3G | 3 | - | 4 |
| 394.5272 Cu II | 0   | 14.99 | - | 18.13 | 4p 1D  | - | 6d 3S | 2 | - | 1 |
| 394.5577 Cu II | 222 | 15.29 | - | 18.43 | 5p 3D  | - | 6d 3F | 1 | - | 2 |
| 394.5766 Cu II | 67  | 15.01 | - | 18.15 | 4p 1F  | - | 6d 3P | 3 | - | 2 |
| 395.2065 Cu II | 34  | 14.99 | - | 18.13 | 5p 3P  | - | 6d 3S | 1 | - | 1 |
| 395.8471 Cu II | 56  | 15.29 | - | 18.42 | 5p 3D  | - | 6d 1D | 1 | - | 2 |
| 396.4497 Cu II | 133 | 15.29 | - | 18.41 | 5p 3D  | - | 6d 3D | 1 | - | 1 |
| 396.4600 Cu II | 1   | 14.42 | - | 17.55 | 4d 3F  | - | 6p 1D | 3 | - | 2 |
| 397.4352 Cu II | 1   | 14.43 | - | 17.55 | 4d 3D  | - | 6p 1D | 2 | - | 2 |
| 397.9912 Cu II | 1   | 11.85 | - | 14.96 | 4s2 1G | - | 5p 3F | 4 | - | 3 |
| 398.5214 Cu II | 67  | 15.32 | - | 18.43 | 5p 1D  | - | 6d 3F | 2 | - | 2 |
| 398.7024 Cu II | 332 | 15.32 | - | 18.43 | 5p 1D  | - | 6d 1F | 2 | - | 3 |
| 398.9817 Cu II | 0   | 15.29 | - | 18.39 | 5p 3D  | - | 6d 1P | 1 | - | 1 |
| 399.0778 Cu II | 4   | 13.65 | - | 16.75 | 5s 3D  | - | 4p 3D | 1 | - | 1 |
| 399.0850 Cu II | 5   | 15.07 | - | 18.17 | 5p 3D  | - | 6d 3D | 3 | - | 2 |
| 399.3302 Cu II | 309 | 15.07 | - | 18.17 | 5p 3D  | - | 6d 3F | 3 | - | 4 |
| 399.3834 Cu II | 8   | 15.07 | - | 18.17 | 5p 3D  | - | 6d 3F | 3 | - | 3 |
| 399.8369 Cu II | 119 | 15.32 | - | 18.42 | 5p 1D  | - | 6d 1D | 2 | - | 2 |
| 400.3476 Cu II | 189 | 15.07 | - | 18.16 | 5p 3D  | - | 6d 3D | 3 | - | 3 |
| 400.4516 Cu II | 13  | 15.32 | - | 18.41 | 5p 1D  | - | 6d 3D | 2 | - | 1 |
| 400.6165 Cu II | 44  | 15.12 | - | 18.22 | 5p 3D  | - | 7s 1D | 2 | - | 2 |
| 401.0912 Cu II | 1   | 15.32 | - | 18.41 | 5p 1D  | - | 6d 3G | 2 | - | 3 |
| 401.4235 Cu II | 8   | 15.12 | - | 18.21 | 5p 3D  | - | 7s 3D | 2 | - | 1 |
| 401.5196 Cu II | 16  | 15.07 | - | 18.15 | 5p 3D  | - | 6d 3G | 3 | - | 4 |
| 401.6423 Cu II | 63  | 15.07 | - | 18.15 | 5p 3D  | - | 6d 3P | 3 | - | 2 |
| 401.6713 Cu II | 0   | 13.87 | - | 16.96 | 4p 5G  | - | 5d 3G | 3 | - | 4 |
| 401.7760 Cu II | 0   | 14.13 | - | 17.22 | 4p 5F  | - | 5d 1G | 3 | - | 4 |
| 401.8686 Cu II | 1   | 14.42 | - | 17.51 | 4d 3F  | - | 6p 1F | 3 | - | 3 |

|                |     |       |   |       |       |   |       |   |   |   |
|----------------|-----|-------|---|-------|-------|---|-------|---|---|---|
| 402.1908 Cu II | 0   | 14.43 | - | 17.51 | 4d 3D | - | 6p 3D | 2 | - | 1 |
| 402.8706 Cu II | 0   | 14.43 | - | 17.51 | 4d 3D | - | 6p 1F | 2 | - | 3 |
| 403.0353 Cu II | 34  | 15.32 | - | 18.39 | 5p 1D | - | 6d 1P | 2 | - | 1 |
| 403.2647 Cu II | 10  | 14.89 | - | 17.96 | 5p 3P | - | 7s 3D | 2 | - | 2 |
| 403.6163 Cu II | 1   | 13.68 | - | 16.75 | 5s 1D | - | 4p 3D | 2 | - | 1 |
| 404.2547 Cu II | 0   | 14.20 | - | 17.26 | 4d 3S | - | 6p 3P | 1 | - | 1 |
| 404.3484 Cu II | 0   | -     | - | -     | -     | - | -     | - | - | - |
| 404.3751 Cu II | 150 | 14.89 | - | 17.95 | 5p 3P | - | 7s 3D | 2 | - | 3 |
| 405.2689 Cu II | 1   | 14.45 | - | 17.51 | 4d 3P | - | 6p 3D | 0 | - | 1 |
| 405.3653 Cu II | 33  | 15.15 | - | 18.21 | 5p 3P | - | 7s 3D | 0 | - | 1 |
| 405.3945 Cu II | 0   | 14.19 | - | 17.25 | 4p 5F | - | 5d 3F | 2 | - | 2 |
| 406.5009 Cu II | 50  | 15.12 | - | 18.17 | 5p 3D | - | 6d 3D | 2 | - | 2 |
| 406.5373 Cu II | 1   | 13.65 | - | 16.70 | 5s 3D | - | 4p 3D | 1 | - | 2 |
| 406.8106 Cu II | 82  | 15.12 | - | 18.17 | 5p 3D | - | 6d 3F | 2 | - | 3 |
| 407.8108 Cu II | 1   | 15.12 | - | 18.16 | 5p 3D | - | 6d 3D | 2 | - | 3 |
| 408.0018 Cu II | 0   | 14.53 | - | 17.57 | 4d 1P | - | 6p 3F | 1 | - | 2 |
| 408.9480 Cu II | 15  | 15.12 | - | 18.15 | 5p 3D | - | 6d 3P | 2 | - | 1 |
| 409.1544 Cu II | 3   | 15.12 | - | 18.15 | 5p 3D | - | 6d 3P | 2 | - | 2 |
| 410.7744 Cu II | 0   | 14.19 | - | 17.21 | 4p 5F | - | 5d 3G | 2 | - | 3 |
| 411.2270 Cu II | 0   | 14.53 | - | 17.55 | 4d 1P | - | 6p 1D | 1 | - | 2 |
| 411.2481 Cu II | 5   | 13.68 | - | 16.70 | 5s 1D | - | 4p 3D | 2 | - | 2 |
| 411.8239 Cu II | 0   | 13.65 | - | 16.66 | 5s 3D | - | 4p 3P | 1 | - | 1 |
| 412.5307 Cu II | 0   | 15.12 | - | 18.13 | 5p 3D | - | 6d 3S | 2 | - | 1 |
| 412.5935 Cu II | 1   | 15.23 | - | 18.24 | 5p 1P | - | 6d 3P | 1 | - | 0 |
| 413.1363 Cu II | 178 | 14.96 | - | 17.96 | 5p 3F | - | 7s 3D | 3 | - | 2 |
| 413.2710 Cu II | 3   | 15.22 | - | 18.22 | 5p 3F | - | 7s 1D | 2 | - | 2 |
| 414.1297 Cu II | 131 | 15.22 | - | 18.21 | 5p 3F | - | 7s 3D | 2 | - | 1 |
| 414.3017 Cu II | 14  | 14.96 | - | 17.95 | 5p 3F | - | 7s 3D | 3 | - | 3 |
| 414.7812 Cu II | 1   | 14.34 | - | 17.33 | 4d 3P | - | 6p 3D | 2 | - | 3 |
| 415.1904 Cu II | 5   | 14.34 | - | 17.33 | 4d 3G | - | 6p 3D | 4 | - | 3 |
| 415.3623 Cu II | 61  | 15.23 | - | 18.22 | 5p 1P | - | 7s 1D | 1 | - | 2 |
| 415.7637 Cu II | 1   | 14.34 | - | 17.32 | 4d 3P | - | 6p 3D | 1 | - | 2 |
| 416.1140 Cu II | 261 | 14.98 | - | 17.95 | 5p 3F | - | 7s 3D | 4 | - | 3 |
| 416.2297 Cu II | 23  | 15.23 | - | 18.21 | 5p 1P | - | 7s 3D | 1 | - | 1 |
| 416.3205 Cu II | 0   | 14.53 | - | 17.51 | 4d 1P | - | 6p 3D | 1 | - | 1 |
| 416.4284 Cu II | 112 | 14.99 | - | 17.96 | 4p 1D | - | 7s 3D | 2 | - | 2 |
| 416.6588 Cu II | 1   | 13.68 | - | 16.66 | 5s 1D | - | 4p 3P | 2 | - | 1 |
| 416.6948 Cu II | 1   | 15.15 | - | 18.13 | 5p 3P | - | 6d 3S | 0 | - | 1 |
| 416.7779 Cu II | 4   | 14.60 | - | 17.57 | 4d 3G | - | 6p 3F | 3 | - | 2 |
| 417.1851 Cu II | 83  | 14.99 | - | 17.96 | 5p 3P | - | 7s 3D | 1 | - | 2 |
| 417.6125 Cu II | 5   | 14.99 | - | 17.95 | 4p 1D | - | 7s 3D | 2 | - | 3 |

|                |     |       |   |       |        |   |       |   |   |   |
|----------------|-----|-------|---|-------|--------|---|-------|---|---|---|
| 417.9512 Cu II | 194 | 15.25 | - | 18.22 | 5p 1F  | - | 7s 1D | 3 | - | 2 |
| 419.5358 Cu II | 10  | 15.22 | - | 18.17 | 5p 3F  | - | 6d 3D | 2 | - | 2 |
| 419.5772 Cu II | 10  | 14.33 | - | 17.28 | 4d 3G  | - | 6p 3F | 5 | - | 4 |
| 419.8656 Cu II | 11  | 15.22 | - | 18.17 | 5p 3F  | - | 6d 3F | 2 | - | 3 |
| 419.9446 Cu II | 0   | 14.62 | - | 17.57 | 4d 3D  | - | 6p 3F | 1 | - | 2 |
|                |     |       |   |       |        |   |       |   |   |   |
| 419.9821 Cu II | 1   | 15.01 | - | 17.96 | 4p 1F  | - | 7s 3D | 3 | - | 2 |
| 420.1440 Cu II | 0   | 14.60 | - | 17.55 | 4d 3G  | - | 6p 1D | 3 | - | 2 |
| 420.1730 Cu II | 3   | 15.29 | - | 18.24 | 5p 3D  | - | 6d 3P | 1 | - | 0 |
| 420.9312 Cu II | 1   | 15.22 | - | 18.16 | 5p 3F  | - | 6d 3D | 2 | - | 3 |
| 421.0822 Cu II | 0   | 14.05 | - | 16.99 | 4p 5F  | - | 5d 3F | 4 | - | 4 |
|                |     |       |   |       |        |   |       |   |   |   |
| 421.0857 Cu II | 0   | 13.65 | - | 16.59 | 5s 3D  | - | 4p 3P | 1 | - | 2 |
| 421.1866 Cu II | 100 | 15.01 | - | 17.95 | 4p 1F  | - | 7s 3D | 3 | - | 3 |
| 421.2314 Cu II | 1   | 14.34 | - | 17.28 | 4d 3G  | - | 6p 3F | 4 | - | 4 |
| 421.6912 Cu II | 16  | 15.23 | - | 18.17 | 5p 1P  | - | 6d 3D | 1 | - | 2 |
| 421.9583 Cu II | 1   | 14.34 | - | 17.28 | 4d 3P  | - | 6p 3F | 2 | - | 3 |
|                |     |       |   |       |        |   |       |   |   |   |
| 422.1428 Cu II | 3   | 15.22 | - | 18.15 | 5p 3F  | - | 6d 3P | 2 | - | 1 |
| 422.3628 Cu II | 1   | 15.22 | - | 18.15 | 5p 3F  | - | 6d 3P | 2 | - | 2 |
| 422.3818 Cu II | 1   | 14.34 | - | 17.28 | 4d 3G  | - | 6p 3F | 4 | - | 3 |
| 422.5195 Cu II | 2   | 14.39 | - | 17.33 | 4d 3D  | - | 6p 3D | 3 | - | 3 |
| 423.0449 Cu II | 26  | 15.29 | - | 18.22 | 5p 3D  | - | 7s 1D | 1 | - | 2 |
|                |     |       |   |       |        |   |       |   |   |   |
| 423.2837 Cu II | 2   | 13.68 | - | 16.61 | 5s 1D  | - | 4p 3D | 2 | - | 3 |
| 423.3130 Cu II | 0   | 14.05 | - | 16.98 | 4p 5F  | - | 5d 3D | 4 | - | 3 |
| 423.3622 Cu II | 0   | 14.62 | - | 17.55 | 4d 3D  | - | 6p 1D | 1 | - | 2 |
| 423.9447 Cu II | 66  | 15.29 | - | 18.21 | 5p 3D  | - | 7s 3D | 1 | - | 1 |
| 424.0412 Cu II | 1   | 14.34 | - | 17.26 | 4d 3P  | - | 6p 3P | 1 | - | 1 |
|                |     |       |   |       |        |   |       |   |   |   |
| 424.1323 Cu II | 1   | 14.65 | - | 17.57 | 4d 1D  | - | 6p 3F | 2 | - | 2 |
| 424.3251 Cu II | 20  | 15.23 | - | 18.15 | 5p 1P  | - | 6d 3P | 1 | - | 1 |
| 424.3598 Cu II | 0   | 15.25 | - | 18.17 | 5p 1F  | - | 6d 3D | 3 | - | 2 |
| 424.6371 Cu II | 0   | 15.25 | - | 18.17 | 5p 1F  | - | 6d 3F | 3 | - | 4 |
| 424.6972 Cu II | 2   | 15.25 | - | 18.17 | 5p 1F  | - | 6d 3F | 3 | - | 3 |
|                |     |       |   |       |        |   |       |   |   |   |
| 424.6985 Cu II | 38  | 15.18 | - | 18.10 | 4d 1S  | - | 5f 1P | 0 | - | 1 |
| 425.1019 Cu II | 31  | 14.20 | - | 17.11 | 4d 3S  | - | 4f 3D | 1 | - | 1 |
| 425.5635 Cu II | 166 | 14.20 | - | 17.11 | 4d 3S  | - | 4f 1D | 1 | - | 2 |
| 425.6849 Cu II | 8   | 15.18 | - | 18.09 | 4d 1S  | - | 5f 3P | 0 | - | 1 |
| 425.7876 Cu II | 3   | 15.25 | - | 18.16 | 5p 1F  | - | 6d 3D | 3 | - | 3 |
|                |     |       |   |       |        |   |       |   |   |   |
| 426.0914 Cu II | 0   | 14.05 | - | 16.96 | 4p 5F  | - | 5d 3G | 4 | - | 4 |
| 426.1418 Cu II | 0   | 13.68 | - | 16.59 | 5s 1D  | - | 4p 3P | 2 | - | 2 |
| 426.7616 Cu II | 1   | 11.85 | - | 14.75 | 4s2 1G | - | 4p 1G | 4 | - | 4 |
| 426.8101 Cu II | 1   | 14.05 | - | 16.95 | 4p 5F  | - | 5d 3G | 4 | - | 5 |
| 426.9530 Cu II | 2   | 14.42 | - | 17.33 | 4d 3F  | - | 6p 3D | 3 | - | 3 |
|                |     |       |   |       |        |   |       |   |   |   |
| 427.1136 Cu II | 4   | 15.25 | - | 18.15 | 5p 1F  | - | 6d 3G | 3 | - | 4 |
| 427.1898 Cu II | 0   | 14.20 | - | 17.10 | 4d 3S  | - | 4p 3S | 1 | - | 1 |



|               |     |       |   |       |       |   |       |   |   |   |
|---------------|-----|-------|---|-------|-------|---|-------|---|---|---|
| 427.2120Cu II | 0   | 15.53 | - | 18.43 | 4p 5P | - | 6d 1F | 3 | - | 3 |
| 427.2525Cu II | 1   | 15.25 | - | 18.15 | 5p 1F | - | 6d 3P | 3 | - | 2 |
| 427.3330Cu II | 0   | 15.53 | - | 18.43 | 4p 5P | - | 6d 3F | 2 | - | 2 |
| 427.5118Cu II | 3   | 14.42 | - | 17.32 | 4d 3F | - | 6p 3D | 3 | - | 2 |
| 427.5412Cu II | 1   | 15.53 | - | 18.43 | 4p 5P | - | 6d 1F | 2 | - | 3 |
| 427.6048Cu II | 100 | 15.32 | - | 18.22 | 5p 1D | - | 7s 1D | 2 | - | 2 |
| 427.6187Cu II | 1   | 14.65 | - | 17.55 | 4d 1D | - | 6p 1D | 2 | - | 2 |
| 427.7800Cu II | 2   | 14.43 | - | 17.33 | 4d 3F | - | 6p 3D | 4 | - | 3 |
| 427.9962Cu II | 30  | 15.07 | - | 17.96 | 5p 3D | - | 7s 3D | 3 | - | 2 |
| 428.0842Cu II | 1   | 14.43 | - | 17.33 | 4d 3D | - | 6p 3D | 2 | - | 3 |
| 428.1836Cu II | 2   | 15.23 | - | 18.13 | 5p 1P | - | 6d 3S | 1 | - | 1 |
| 428.5243Cu II | 14  | 15.32 | - | 18.21 | 5p 1D | - | 7s 3D | 2 | - | 1 |
| 428.6460Cu II | 1   | 14.43 | - | 17.32 | 4d 3D | - | 6p 3D | 2 | - | 2 |
| 428.7043Cu II | 2   | 14.62 | - | 17.51 | 4d 1G | - | 6p 1F | 4 | - | 3 |
| 428.7626Cu II | 1   | 14.62 | - | 17.51 | 4d 3D | - | 6p 3D | 1 | - | 1 |
| 428.7772Cu II | 1   | 14.39 | - | 17.28 | 4d 3D | - | 6p 3F | 3 | - | 4 |
| 428.8459Cu II | 1   | 15.53 | - | 18.42 | 4p 5P | - | 6d 1D | 2 | - | 2 |
| 429.1084Cu II | 0   | 13.39 | - | 16.28 | 5s 3D | - | 4p 5D | 3 | - | 3 |
| 429.2470Cu II | 90  | 15.07 | - | 17.95 | 5p 3D | - | 7s 3D | 3 | - | 3 |
| 429.3320Cu II | 1   | 15.53 | - | 18.41 | 4p 5P | - | 6d 1G | 3 | - | 4 |
| 429.5533Cu II | 0   | 15.53 | - | 18.41 | 4p 5P | - | 6d 3D | 2 | - | 1 |
| 429.6119Cu II | 0   | 15.29 | - | 18.17 | 5p 3D | - | 6d 3D | 1 | - | 2 |
| 429.9693Cu II | 2   | 14.39 | - | 17.28 | 4d 3D | - | 6p 3F | 3 | - | 3 |
| 429.9799Cu II | 1   | 14.69 | - | 17.57 | 4d 1F | - | 6p 3F | 3 | - | 2 |
| 430.8711Cu II | 1   | 14.70 | - | 17.57 | 4d 3F | - | 6p 3F | 2 | - | 2 |
| 432.0761Cu II | 0   | 14.20 | - | 17.07 | 4d 3S | - | 4p 1D | 1 | - | 2 |
| 432.5274Cu II | 0   | 15.53 | - | 18.39 | 4p 5P | - | 6d 1P | 2 | - | 1 |
| 432.5768Cu II | 0   | 15.29 | - | 18.15 | 5p 3D | - | 6d 3P | 1 | - | 2 |
| 433.1290Cu II | 1   | 14.65 | - | 17.51 | 4d 1D | - | 6p 3D | 2 | - | 1 |
| 433.2822Cu II | 0   | 15.57 | - | 18.43 | 4p 5P | - | 6d 3F | 1 | - | 2 |
| 433.3437Cu II | 0   | 14.42 | - | 17.28 | 4d 3F | - | 6p 3F | 3 | - | 4 |
| 433.5634Cu II | 1   | 14.69 | - | 17.55 | 4d 1F | - | 6p 1D | 3 | - | 2 |
| 434.0126Cu II | 0   | 14.13 | - | 16.99 | 4p 5F | - | 5d 3F | 3 | - | 3 |
| 434.1957Cu II | 3   | 14.43 | - | 17.28 | 4d 3F | - | 6p 3F | 4 | - | 4 |
| 434.3153Cu II | 1   | 15.32 | - | 18.17 | 5p 1D | - | 6d 3D | 2 | - | 2 |
| 434.4696Cu II | 1   | 14.70 | - | 17.55 | 4d 3F | - | 6p 1D | 2 | - | 2 |
| 434.5614Cu II | 0   | 14.42 | - | 17.28 | 4d 3F | - | 6p 3F | 3 | - | 3 |
| 434.6688Cu II | 2   | 15.32 | - | 18.17 | 5p 1D | - | 6d 3F | 2 | - | 3 |
| 435.0990Cu II | 1   | 13.43 | - | 16.28 | 5s 3D | - | 4p 5D | 2 | - | 3 |
| 435.4182Cu II | 2   | 14.43 | - | 17.28 | 4d 3F | - | 6p 3F | 4 | - | 3 |
| 435.8110Cu II | 2   | 15.32 | - | 18.16 | 5p 1D | - | 6d 3D | 2 | - | 3 |
| 436.0099Cu II | 0   | 13.39 | - | 16.24 | 5s 3D | - | 4p 5D | 3 | - | 2 |

|               |    |       |   |       |        |   |       |   |   |   |
|---------------|----|-------|---|-------|--------|---|-------|---|---|---|
| 436.5370Cu II | 24 | 15.12 | - | 17.96 | 5p 3D  | - | 7s 3D | 2 | - | 2 |
| 437.1099Cu II | 0  | 15.32 | - | 18.15 | 5p 1D  | - | 6d 3P | 2 | - | 1 |
| 437.3458Cu II | 3  | 15.32 | - | 18.15 | 5p 1D  | - | 6d 3P | 2 | - | 2 |
| 437.4498Cu II | 0  | 14.43 | - | 17.26 | 4d 3D  | - | 6p 3P | 2 | - | 1 |
| 437.8384Cu II | 2  | 15.12 | - | 17.95 | 5p 3D  | - | 7s 3D | 2 | - | 3 |
| 439.1159Cu II | 0  | 14.43 | - | 17.25 | 4p 3D  | - | 5d 3F | 3 | - | 2 |
| 439.1491Cu II | 1  | 14.13 | - | 16.96 | 4p 5F  | - | 5d 3G | 3 | - | 4 |
| 439.1831Cu II | 0  | 14.34 | - | 17.16 | 4d 3P  | - | 4p 3G | 2 | - | 3 |
| 439.5526Cu II | 1  | 14.43 | - | 17.25 | 4p 3D  | - | 5d 1F | 3 | - | 3 |
| 439.6419Cu II | 3  | 14.34 | - | 17.16 | 4d 3G  | - | 4p 3G | 4 | - | 3 |
| 440.0400Cu II | 1  | 14.69 | - | 17.51 | 4d 1F  | - | 6p 1F | 3 | - | 3 |
| 440.1590Cu II | 2  | 14.70 | - | 17.51 | 4d 3F  | - | 6p 3D | 2 | - | 1 |
| 440.3507Cu II | 0  | 14.42 | - | 17.24 | 4d 3F  | - | 4p 3D | 3 | - | 2 |
| 440.3751Cu II | 0  | 14.20 | - | 17.01 | 4d 3S  | - | 4p 1P | 1 | - | 1 |
| 440.9734Cu II | 0  | 14.70 | - | 17.51 | 4d 3F  | - | 6p 1F | 2 | - | 3 |
| 441.0937Cu II | 1  | 14.45 | - | 17.26 | 4d 3P  | - | 6p 3P | 0 | - | 1 |
| 441.2055Cu II | 2  | 15.32 | - | 18.13 | 5p 1D  | - | 6d 3S | 2 | - | 1 |
| 441.9083Cu II | 4  | 14.34 | - | 17.14 | 4d 3P  | - | 4f 3G | 2 | - | 3 |
| 442.2396Cu II | 0  | 14.43 | - | 17.23 | 4p 3D  | - | 5d 1D | 3 | - | 2 |
| 442.2583Cu II | 0  | 13.43 | - | 16.23 | 5s 3D  | - | 4p 5D | 2 | - | 1 |
| 442.3728Cu II | 1  | 14.34 | - | 17.14 | 4d 3G  | - | 4f 3G | 4 | - | 3 |
| 442.7981Cu II | 2  | 11.85 | - | 14.65 | 4s2 1G | - | 4p 3F | 4 | - | 3 |
| 443.1911Cu II | 10 | 14.34 | - | 17.14 | 4d 3G  | - | 4f 1G | 4 | - | 4 |
| 443.5691Cu II | 4  | 14.34 | - | 17.13 | 4d 3P  | - | 4f 3F | 2 | - | 2 |
| 443.9639Cu II | 0  | 14.64 | - | 17.43 | 4p 3D  | - | 5d 1S | 1 | - | 0 |
| 444.0883Cu II | 11 | 14.34 | - | 17.13 | 4d 3P  | - | 4f 3F | 1 | - | 2 |
| 444.1717Cu II | 3  | 14.43 | - | 17.22 | 4p 3D  | - | 5d 1G | 3 | - | 4 |
| 444.1896Cu II | 0  | 14.33 | - | 17.12 | 4d 3G  | - | 4f 3H | 5 | - | 4 |
| 444.4124Cu II | 2  | 14.33 | - | 17.12 | 4d 3G  | - | 4f 1H | 5 | - | 5 |
| 444.4831Cu II | 27 | 14.34 | - | 17.13 | 4d 3P  | - | 4f 1F | 2 | - | 3 |
| 444.7329Cu II | 0  | 14.53 | - | 17.32 | 4d 1P  | - | 6p 3D | 1 | - | 2 |
| 444.8045Cu II | 0  | 14.46 | - | 17.25 | 4p 3G  | - | 5d 1F | 3 | - | 3 |
| 444.9531Cu II | 1  | 14.34 | - | 17.13 | 4d 3G  | - | 4f 1F | 4 | - | 3 |
| 445.4350Cu II | 0  | 14.43 | - | 17.21 | 4p 3D  | - | 5d 3G | 3 | - | 3 |
| 446.0439Cu II | 0  | 14.34 | - | 17.12 | 4d 3G  | - | 4f 3H | 4 | - | 4 |
| 446.2686Cu II | 80 | 14.34 | - | 17.12 | 4d 3G  | - | 4f 1H | 4 | - | 5 |
| 446.5110Cu II | 1  | 14.34 | - | 17.11 | 4d 3P  | - | 4f 3D | 2 | - | 1 |
| 446.8708Cu II | 1  | 13.39 | - | 16.17 | 5s 3D  | - | 4p 3P | 3 | - | 2 |
| 446.9036Cu II | 9  | 14.33 | - | 17.10 | 4d 3G  | - | 4p 3P | 5 | - | 4 |
| 447.0202Cu II | 4  | 14.34 | - | 17.11 | 4d 3P  | - | 4f 1D | 2 | - | 2 |
| 447.0371Cu II | 2  | 14.34 | - | 17.11 | 4d 3P  | - | 4f 3D | 1 | - | 1 |

|               |    |       |   |       |        |   |       |   |   |   |
|---------------|----|-------|---|-------|--------|---|-------|---|---|---|
| 447.5476Cu II | 1  | 14.34 | - | 17.11 | 4d 3P  | - | 4f 1D | 1 | - | 2 |
| 448.5280Cu II | 0  | 14.20 | - | 16.96 | 4d 3S  | - | 4p 3F | 1 | - | 2 |
| 448.7807Cu II | 1  | 14.34 | - | 17.10 | 4d 3G  | - | 4p 3P | 4 | - | 4 |
| 448.8150Cu II | 0  | 14.34 | - | 17.10 | 4d 3P  | - | 4p 3S | 2 | - | 1 |
| 449.3466Cu II | 1  | 14.34 | - | 17.10 | 4d 3P  | - | 4p 3S | 1 | - | 1 |
|               |    |       |   |       |        |   |       |   |   |   |
| 449.5353Cu II | 1  | 14.46 | - | 17.22 | 4p 3G  | - | 5d 1G | 3 | - | 4 |
| 449.8552Cu II | 0  | 15.94 | - | 18.69 | 4p 3F  | - | 8s 3D | 3 | - | 2 |
| 450.6002Cu II | 0  | -     |   | -     |        | - |       |   |   |   |
| 450.7026Cu II | 1  | 14.39 | - | 17.14 | 4d 3D  | - | 4f 3G | 3 | - | 3 |
| 450.8294Cu II | 0  | 14.46 | - | 17.21 | 4p 3G  | - | 5d 3G | 3 | - | 3 |
|               |    |       |   |       |        |   |       |   |   |   |
| 451.5520Cu II | 53 | 14.39 | - | 17.14 | 4d 3D  | - | 4f 1G | 3 | - | 4 |
| 451.6049Cu II | 5  | 15.22 | - | 17.96 | 5p 3F  | - | 7s 3D | 2 | - | 2 |
| 452.3416Cu II | 0  | 11.85 | - | 14.59 | 4s2 1G | - | 4p 3F | 4 | - | 4 |
| 452.4303Cu II | 1  | 14.39 | - | 17.13 | 4d 3D  | - | 4f 3F | 3 | - | 2 |
| 452.8528Cu II | 1  | 14.42 | - | 17.16 | 4d 3F  | - | 4p 3G | 3 | - | 3 |
|               |    |       |   |       |        |   |       |   |   |   |
| 452.9979Cu II | 1  | 15.22 | - | 17.95 | 5p 3F  | - | 7s 3D | 2 | - | 3 |
| 453.3714Cu II | 0  | 13.43 | - | 16.17 | 5s 3D  | - | 4p 3P | 2 | - | 2 |
| 453.3813Cu II | 4  | 14.39 | - | 17.13 | 4d 3D  | - | 4f 1F | 3 | - | 3 |
| 454.1032Cu II | 10 | 15.23 | - | 17.96 | 5p 1P  | - | 7s 3D | 1 | - | 2 |
| 454.1256Cu II | 1  | 14.43 | - | 17.16 | 4d 3D  | - | 4p 3G | 2 | - | 3 |
|               |    |       |   |       |        |   |       |   |   |   |
| 454.2117Cu II | 1  | 14.34 | - | 17.07 | 4d 3P  | - | 4p 1D | 2 | - | 2 |
| 454.2171Cu II | 1  | 14.53 | - | 17.26 | 4d 1P  | - | 6p 3P | 1 | - | 1 |
| 454.5138Cu II | 1  | 14.39 | - | 17.12 | 4d 3D  | - | 4f 3H | 3 | - | 4 |
| 454.5470Cu II | 0  | 14.60 | - | 17.33 | 4d 3G  | - | 6p 3D | 3 | - | 3 |
| 454.6436Cu II | 4  | 14.52 | - | 17.25 | 4p 3D  | - | 5d 1F | 2 | - | 3 |
|               |    |       |   |       |        |   |       |   |   |   |
| 454.7562Cu II | 1  | 14.34 | - | 17.07 | 4d 3P  | - | 4p 1D | 1 | - | 2 |
| 455.1451Cu II | 0  | 15.97 | - | 18.69 | 4p 3F  | - | 8s 3D | 4 | - | 3 |
| 455.1805Cu II | 4  | 14.60 | - | 17.32 | 4d 3G  | - | 6p 3D | 3 | - | 2 |
| 455.5920Cu II | 0  | -     |   | -     |        | - |       |   |   |   |
| 455.7508Cu II | 51 | 14.42 | - | 17.14 | 4d 3F  | - | 4f 3G | 3 | - | 3 |
|               |    |       |   |       |        |   |       |   |   |   |
| 456.0212Cu II | 0  | 14.39 | - | 17.11 | 4d 3D  | - | 4f 1D | 3 | - | 2 |
| 456.6193Cu II | 1  | 14.42 | - | 17.14 | 4d 3F  | - | 4f 1G | 3 | - | 4 |
| 456.6933Cu II | 1  | 14.43 | - | 17.14 | 4d 3F  | - | 4f 3G | 4 | - | 3 |
| 456.7254Cu II | 0  | 15.98 | - | 18.69 | 4p 3D  | - | 8s 3D | 2 | - | 3 |
| 457.0400Cu II | 5  | 14.43 | - | 17.14 | 4d 3D  | - | 4f 3G | 2 | - | 3 |
|               |    |       |   |       |        |   |       |   |   |   |
| 457.1995Cu II | 1  | 15.25 | - | 17.96 | 5p 1F  | - | 7s 3D | 3 | - | 2 |
| 457.3559Cu II | 1  | 14.39 | - | 17.10 | 4d 3D  | - | 4p 3P | 3 | - | 4 |
| 457.3701Cu II | 3  | 14.62 | - | 17.33 | 4d 1G  | - | 6p 3D | 4 | - | 3 |
| 457.5175Cu II | 4  | 14.42 | - | 17.13 | 4d 3F  | - | 4f 3F | 3 | - | 2 |
| 457.5189Cu II | 2  | 14.52 | - | 17.23 | 4p 3D  | - | 5d 1D | 2 | - | 2 |
|               |    |       |   |       |        |   |       |   |   |   |
| 457.5654Cu II | 33 | 14.43 | - | 17.14 | 4d 3F  | - | 4f 1G | 4 | - | 4 |
| 458.6273Cu II | 2  | 15.25 | - | 17.95 | 5p 1F  | - | 7s 3D | 3 | - | 3 |

|                |      |       |   |       |       |   |       |   |   |   |  |
|----------------|------|-------|---|-------|-------|---|-------|---|---|---|--|
| 458.8167 Cu II | 12   | 14.43 | - | 17.13 | 4d 3D | - | 4f 3F | 2 | - | 2 |  |
| 458.9602 Cu II | 1    | 14.62 | - | 17.32 | 4d 3D | - | 6p 3D | 1 | - | 2 |  |
| 459.2614 Cu II | 0    | 14.52 | - | 17.22 | 4p 3D | - | 5d 3D | 2 | - | 1 |  |
| 459.4438 Cu II | 4    | 14.43 | - | 17.13 | 4d 3F | - | 4f 1F | 4 | - | 3 |  |
| 459.6482 Cu II | 305  | 14.42 | - | 17.12 | 4d 3F | - | 4f 3H | 3 | - | 4 |  |
| 459.6906 Cu II | 0    | -     |   | -     |       | - |       |   |   |   |  |
| 459.7947 Cu II | 130  | 14.43 | - | 17.13 | 4d 3D | - | 4f 1F | 2 | - | 3 |  |
| 460.6069 Cu II | 5    | 14.43 | - | 17.12 | 4d 3F | - | 4f 3H | 4 | - | 4 |  |
| 460.8465 Cu II | 174  | 14.43 | - | 17.12 | 4d 3F | - | 4f 1H | 4 | - | 5 |  |
| 460.9397 Cu II | 4    | 14.52 | - | 17.21 | 4p 3D | - | 5d 3G | 2 | - | 3 |  |
| 460.9510 Cu II | 0    | 15.53 | - | 18.22 | 4p 5P | - | 7s 1D | 2 | - | 2 |  |
| 461.0205 Cu II | 0    | 14.30 | - | 16.99 | 4p 3G | - | 5d 3F | 4 | - | 4 |  |
| 461.4337 Cu II | 0    | 16.01 | - | 18.69 | 4p 3D | - | 8s 3D | 3 | - | 2 |  |
| 461.9650 Cu II | 4    | 14.43 | - | 17.11 | 4d 3D | - | 4f 3D | 2 | - | 1 |  |
| 462.5102 Cu II | 30   | 14.43 | - | 17.11 | 4d 3D | - | 4f 1D | 2 | - | 2 |  |
| 462.5551 Cu II | 0    | 14.42 | - | 17.10 | 4d 3F | - | 4p 3P | 3 | - | 4 |  |
| 463.1805 Cu II | 0    | 14.60 | - | 17.28 | 4d 3G | - | 6p 3F | 3 | - | 3 |  |
| 463.3017 Cu II | 0    | 15.29 | - | 17.96 | 5p 3D | - | 7s 3D | 1 | - | 2 |  |
| 463.3087 Cu II | 0    | 14.65 | - | 17.33 | 4d 1D | - | 6p 3D | 2 | - | 3 |  |
| 463.5076 Cu II | 0    | 14.39 | - | 17.07 | 4d 3D | - | 4p 1D | 3 | - | 2 |  |
| 463.5259 Cu II | 3    | 14.43 | - | 17.10 | 4d 3F | - | 4p 3P | 4 | - | 4 |  |
| 463.9585 Cu II | 1    | 14.34 | - | 17.01 | 4d 3P | - | 4p 1P | 1 | - | 1 |  |
| 463.9668 Cu II | 0    | 14.65 | - | 17.32 | 4d 1D | - | 6p 3D | 2 | - | 2 |  |
| 464.4317 Cu II | 1    | 14.43 | - | 17.10 | 4d 3D | - | 4p 3S | 2 | - | 1 |  |
| 464.7116 Cu II | 0    | 14.62 | - | 17.28 | 4d 1G | - | 6p 3F | 4 | - | 4 |  |
| 464.9271 Cu II | 0    | 14.20 | - | 16.86 | 4d 3S | - | 4f 3D | 1 | - | 2 |  |
| 465.7942 Cu II | 1    | 14.52 | - | 17.18 | 4p 3D | - | 5d 1P | 2 | - | 1 |  |
| 466.0307 Cu II | 495  | 14.45 | - | 17.11 | 4d 3P | - | 4f 3D | 0 | - | 1 |  |
| 466.1122 Cu II | 3    | 14.62 | - | 17.28 | 4d 1G | - | 6p 3F | 4 | - | 3 |  |
| 466.1363 Cu II | 13   | 14.20 | - | 16.86 | 4d 3S | - | 4f 1P | 1 | - | 1 |  |
| 466.2649 Cu II | 1    | 14.20 | - | 16.86 | 4d 3S | - | 4p 5S | 1 | - | 2 |  |
| 466.3007 Cu II | 0    | 14.34 | - | 17.00 | 4d 3P | - | 4p 3G | 2 | - | 3 |  |
| 466.6326 Cu II | 1    | 13.43 | - | 16.09 | 5s 3D | - | 4p 3P | 2 | - | 1 |  |
| 467.1702 Cu II | 1205 | 14.20 | - | 16.85 | 4d 3S | - | 4f 3P | 1 | - | 2 |  |
| 467.3577 Cu II | 611  | 14.20 | - | 16.85 | 4d 3S | - | 4f 3P | 1 | - | 0 |  |
| 467.8953 Cu II | 1    | 14.30 | - | 16.95 | 4p 3G | - | 5d 3G | 4 | - | 5 |  |
| 468.1994 Cu II | 1439 | 14.20 | - | 16.85 | 4d 3S | - | 4f 3P | 1 | - | 1 |  |
| 468.5411 Cu II | 1    | 14.45 | - | 17.10 | 4d 3P | - | 4p 3S | 0 | - | 1 |  |
| 468.7764 Cu II | 0    | 15.32 | - | 17.96 | 5p 1D | - | 7s 3D | 2 | - | 2 |  |
| 468.8485 Cu II | 1    | 14.42 | - | 17.07 | 4d 3F | - | 4p 1D | 3 | - | 2 |  |
| 469.0678 Cu II | 1    | 14.62 | - | 17.26 | 4d 3D | - | 6p 3P | 1 | - | 1 |  |
| 469.7633 Cu II | 1    | 14.60 | - | 17.24 | 4d 3G | - | 4p 3D | 3 | - | 2 |  |

|               |      |       |   |       |        |   |       |   |   |   |  |
|---------------|------|-------|---|-------|--------|---|-------|---|---|---|--|
| 470.2129Cu II | 1    | 14.43 | - | 17.07 | 4d 3D  | - | 4p 1D | 2 | - | 2 |  |
| 470.2776Cu II | 2    | 15.32 | - | 17.95 | 5p 1D  | - | 7s 3D | 2 | - | 3 |  |
| 470.2952Cu II | 1    | 14.69 | - | 17.33 | 4d 1F  | - | 6p 3D | 3 | - | 3 |  |
| 471.2043Cu II | 1    | 14.59 | - | 17.22 | 4p 3F  | - | 5d 1G | 4 | - | 4 |  |
| 471.3616Cu II | 0    | 14.70 | - | 17.33 | 4d 3F  | - | 6p 3D | 2 | - | 3 |  |
| 472.0428Cu II | 2    | 14.70 | - | 17.32 | 4d 3F  | - | 6p 3D | 2 | - | 2 |  |
| 472.2815Cu II | 0    | 14.65 | - | 17.28 | 4d 1D  | - | 6p 3F | 2 | - | 3 |  |
| 472.4279Cu II | 1    | 14.34 | - | 16.96 | 4d 3P  | - | 4p 3F | 2 | - | 2 |  |
| 473.0169Cu II | 2    | 14.34 | - | 16.96 | 4d 3P  | - | 4p 3F | 1 | - | 2 |  |
| 473.7540Cu II | 1    | 13.39 | - | 16.01 | 5s 3D  | - | 4p 3D | 3 | - | 3 |  |
| 474.2886Cu II | 0    | 11.85 | - | 14.46 | 4s2 1G | - | 4p 3G | 4 | - | 3 |  |
| 474.2987Cu II | 1    | 14.65 | - | 17.26 | 4d 1D  | - | 6p 3P | 2 | - | 1 |  |
| 474.4592Cu II | 10   | 14.64 | - | 17.25 | 4p 3D  | - | 5d 3F | 1 | - | 2 |  |
| 475.8433Cu II | 0    | -     | - | -     | -      | - | -     | - | - | - |  |
| 476.0780Cu II | 0    | 14.65 | - | 17.25 | 4p 3F  | - | 5d 3F | 3 | - | 2 |  |
| 476.1034Cu II | 1    | 14.39 | - | 17.00 | 4d 3D  | - | 4p 3G | 3 | - | 3 |  |
| 476.5913Cu II | 1    | 14.65 | - | 17.25 | 4p 3F  | - | 5d 1F | 3 | - | 3 |  |
| 476.6740Cu II | 0    | 14.20 | - | 16.80 | 4d 3S  | - | 4p 3P | 1 | - | 0 |  |
| 477.2787Cu II | 1    | 13.68 | - | 16.28 | 5s 1D  | - | 4p 5D | 2 | - | 3 |  |
| 477.2966Cu II | 1    | 14.53 | - | 17.13 | 4d 1P  | - | 4f 3F | 1 | - | 2 |  |
| 478.0146Cu II | 0    | 10.96 | - | 13.55 | 4s2 3P | - | 4p 5D | 2 | - | 3 |  |
| 478.1080Cu II | 4    | 14.64 | - | 17.23 | 4p 3D  | - | 5d 1D | 1 | - | 2 |  |
| 479.2712Cu II | 1    | 13.65 | - | 16.24 | 5s 3D  | - | 4p 5D | 1 | - | 2 |  |
| 479.5434Cu II | 1    | 14.69 | - | 17.28 | 4d 1F  | - | 6p 3F | 3 | - | 3 |  |
| 479.7308Cu II | 2    | 13.39 | - | 15.98 | 5s 3D  | - | 4p 3D | 3 | - | 2 |  |
| 479.7519Cu II | 0    | 14.65 | - | 17.23 | 4p 3F  | - | 5d 1D | 3 | - | 2 |  |
| 480.0112Cu II | 6    | 14.64 | - | 17.22 | 4p 3D  | - | 5d 3D | 1 | - | 1 |  |
| 480.0582Cu II | 1    | 14.43 | - | 17.01 | 4d 3D  | - | 4p 1P | 2 | - | 1 |  |
| 480.4092Cu II | 0    | 11.85 | - | 14.43 | 4s2 1G | - | 4p 3D | 4 | - | 3 |  |
| 480.5653Cu II | 1    | 14.34 | - | 16.92 | 4d 3P  | - | 4p 3D | 2 | - | 3 |  |
| 480.6522Cu II | 0    | 14.70 | - | 17.28 | 4d 3F  | - | 6p 3F | 2 | - | 3 |  |
| 480.7046Cu II | 564  | 14.53 | - | 17.11 | 4d 1P  | - | 4f 3D | 1 | - | 1 |  |
| 481.0666Cu II | 1    | 13.43 | - | 16.01 | 5s 3D  | - | 4p 3D | 2 | - | 3 |  |
| 481.1147Cu II | 0    | 14.34 | - | 16.92 | 4d 3G  | - | 4p 3D | 4 | - | 3 |  |
| 481.2948Cu II | 2613 | 14.53 | - | 17.11 | 4d 1P  | - | 4f 1D | 1 | - | 2 |  |
| 481.4868Cu II | 5    | 13.39 | - | 15.97 | 5s 3D  | - | 4p 3F | 3 | - | 4 |  |
| 482.0265Cu II | 1    | 14.65 | - | 17.22 | 4p 3F  | - | 5d 1G | 3 | - | 4 |  |
| 482.4926Cu II | 0    | 14.39 | - | 16.96 | 4d 3D  | - | 4p 3F | 3 | - | 2 |  |
| 482.7416Cu II | 1    | 14.70 | - | 17.26 | 4d 3F  | - | 6p 3P | 2 | - | 1 |  |
| 482.7933Cu II | 0    | 14.43 | - | 17.00 | 4d 3F  | - | 4p 3G | 4 | - | 3 |  |
| 482.9335Cu II | 87   | 14.33 | - | 16.90 | 4d 3G  | - | 4f 3G | 5 | - | 4 |  |

|                |      |       |   |       |       |   |       |   |   |   |  |
|----------------|------|-------|---|-------|-------|---|-------|---|---|---|--|
| 482.9980 Cu II | 0    | 14.43 | - | 17.00 | 4p 3D | - | 5d 3D | 3 | - | 2 |  |
| 483.3760 Cu II | 1    | 14.53 | - | 17.10 | 4d 1P | - | 4p 3S | 1 | - | 1 |  |
| 483.5146 Cu II | 0    | 14.65 | - | 17.21 | 4p 3F | - | 5d 3G | 3 | - | 3 |  |
| 483.6799 Cu II | 17   | 14.43 | - | 16.99 | 4p 3D | - | 5d 3F | 3 | - | 4 |  |
| 483.9067 Cu II | 0    | 14.43 | - | 16.99 | 4p 3D | - | 5d 3F | 3 | - | 3 |  |
| 484.4500 Cu II | 0    | 14.45 | - | 17.01 | 4d 3P | - | 4p 1P | 0 | - | 1 |  |
| 484.7382 Cu II | 1    | 14.20 | - | 16.75 | 4d 3S | - | 4p 3D | 1 | - | 1 |  |
| 485.1262 Cu II | 48   | 14.34 | - | 16.90 | 4d 3G | - | 4f 3G | 4 | - | 4 |  |
| 485.4988 Cu II | 1567 | 14.33 | - | 16.88 | 4d 3G | - | 4f 3G | 5 | - | 5 |  |
| 485.9070 Cu II | 0    | 13.68 | - | 16.23 | 5s 1D | - | 4p 5D | 2 | - | 1 |  |
| 486.1561 Cu II | 72   | 14.33 | - | 16.88 | 4d 3G | - | 4f 3F | 5 | - | 4 |  |
| 486.3803 Cu II | 1    | 13.39 | - | 15.94 | 5s 3D | - | 4p 3D | 3 | - | 2 |  |
| 486.6130 Cu II | 1    | 13.39 | - | 15.94 | 5s 3D | - | 4p 3F | 3 | - | 3 |  |
| 486.6256 Cu II | 11   | 14.43 | - | 16.98 | 4p 3D | - | 5d 3D | 3 | - | 3 |  |
| 487.1523 Cu II | 0    | 14.64 | - | 17.18 | 4p 3D | - | 5d 1P | 1 | - | 1 |  |
| 487.2205 Cu II | 2    | 14.62 | - | 17.16 | 4d 1G | - | 4p 3G | 4 | - | 3 |  |
| 487.2306 Cu II | 1    | 13.43 | - | 15.98 | 5s 3D | - | 4p 3D | 2 | - | 2 |  |
| 487.3304 Cu II | 727  | 14.60 | - | 17.14 | 4d 3G | - | 4f 3G | 3 | - | 3 |  |
| 487.7149 Cu II | 15   | 14.34 | - | 16.88 | 4d 3G | - | 4f 3G | 4 | - | 5 |  |
| 487.7447 Cu II | 0    | 14.70 | - | 17.24 | 4d 3F | - | 4p 3D | 2 | - | 2 |  |
| 488.2826 Cu II | 4    | 14.42 | - | 16.96 | 4d 3F | - | 4p 3F | 3 | - | 2 |  |
| 488.3235 Cu II | 24   | 14.60 | - | 17.14 | 4d 3G | - | 4f 1G | 3 | - | 4 |  |
| 488.3783 Cu II | 1331 | 14.34 | - | 16.88 | 4d 3G | - | 4f 3F | 4 | - | 4 |  |
| 489.3469 Cu II | 0    | 14.46 | - | 17.00 | 4p 3G | - | 5d 3D | 3 | - | 2 |  |
| 489.3508 Cu II | 36   | 14.60 | - | 17.13 | 4d 3G | - | 4f 3F | 3 | - | 2 |  |
| 489.6416 Cu II | 1    | 14.53 | - | 17.07 | 4d 1P | - | 4p 1D | 1 | - | 2 |  |
| 489.7627 Cu II | 6    | 14.43 | - | 16.96 | 4d 3D | - | 4p 3F | 2 | - | 2 |  |
| 490.0469 Cu II | 8    | 14.46 | - | 16.99 | 4p 3G | - | 5d 3F | 3 | - | 4 |  |
| 490.1427 Cu II | 119  | 14.34 | - | 16.87 | 4d 3P | - | 4f 3D | 2 | - | 3 |  |
| 490.2797 Cu II | 1    | 14.46 | - | 16.99 | 4p 3G | - | 5d 3F | 3 | - | 3 |  |
| 490.3008 Cu II | 1    | 14.43 | - | 16.96 | 4p 3D | - | 5d 3G | 3 | - | 4 |  |
| 490.5715 Cu II | 4    | 14.43 | - | 16.96 | 4p 3D | - | 5d 3P | 3 | - | 2 |  |
| 490.5767 Cu II | 25   | 14.62 | - | 17.14 | 4d 1G | - | 4f 3G | 4 | - | 3 |  |
| 490.6567 Cu II | 440  | 14.34 | - | 16.86 | 4d 3P | - | 4f 3D | 2 | - | 2 |  |
| 490.7142 Cu II | 118  | 14.34 | - | 16.87 | 4d 3G | - | 4f 3D | 4 | - | 3 |  |
| 490.9039 Cu II | 168  | 14.33 | - | 16.85 | 4d 3G | - | 4f 3H | 5 | - | 5 |  |
| 490.9836 Cu II | 1    | 14.39 | - | 16.92 | 4d 3D | - | 4p 3D | 3 | - | 3 |  |
| 491.1063 Cu II | 0    | 16.17 | - | 18.69 | 4p 3P | - | 8s 3D | 2 | - | 3 |  |
| 491.2366 Cu II | 2297 | 14.34 | - | 16.86 | 4d 3P | - | 4f 3F | 2 | - | 3 |  |
| 491.2921 Cu II | 1722 | 14.34 | - | 16.86 | 4d 3P | - | 4f 3D | 1 | - | 2 |  |
| 491.5832 Cu II | 927  | 14.62 | - | 17.14 | 4d 1G | - | 4f 1G | 4 | - | 4 |  |
| 491.7892 Cu II | 6532 | 14.60 | - | 17.12 | 4d 3G | - | 4f 3H | 3 | - | 4 |  |

|               |      |       |   |       |       |   |       |   |   |   |  |
|---------------|------|-------|---|-------|-------|---|-------|---|---|---|--|
| 491.8106Cu II | 6    | 14.34 | - | 16.86 | 4d 3G | - | 4f 3F | 4 | - | 3 |  |
| 491.8376Cu II | 0    | -     |   | -     |       | - |       |   |   |   |  |
| 492.0036Cu II | 104  | 14.34 | - | 16.86 | 4d 3P | - | 4f 1P | 2 | - | 1 |  |
| 492.1469Cu II | 1    | 14.34 | - | 16.86 | 4d 3P | - | 4p 5S | 2 | - | 2 |  |
| 492.6424Cu II | 1178 | 14.34 | - | 16.86 | 4d 3P | - | 4f 1P | 1 | - | 1 |  |
| 492.6819Cu II | 0    | 14.05 | - | 16.56 | 4p 5F | - | 6s 3D | 4 | - | 3 |  |
| 492.7861Cu II | 0    | 14.34 | - | 16.86 | 4d 3P | - | 4p 5S | 1 | - | 2 |  |
| 493.0709Cu II | 7    | 14.46 | - | 16.98 | 4p 3G | - | 5d 3D | 3 | - | 3 |  |
| 493.1556Cu II | 1837 | 14.34 | - | 16.85 | 4d 3P | - | 4f 3P | 2 | - | 2 |  |
| 493.1698Cu II | 8223 | 14.34 | - | 16.85 | 4d 3G | - | 4f 3H | 4 | - | 5 |  |
| 493.3075Cu II | 1    | 14.33 | - | 16.84 | 4d 3G | - | 4p 3F | 5 | - | 4 |  |
| 493.5545Cu II | 0    | 14.60 | - | 17.11 | 4d 3G | - | 4f 1D | 3 | - | 2 |  |
| 493.7221Cu II | 2619 | 14.62 | - | 17.13 | 4d 3D | - | 4f 3F | 1 | - | 2 |  |
| 493.7520Cu II | 50   | 14.62 | - | 17.13 | 4d 1G | - | 4f 1F | 4 | - | 3 |  |
| 493.7975Cu II | 201  | 14.34 | - | 16.85 | 4d 3P | - | 4f 3P | 1 | - | 2 |  |
| 493.9653Cu II | 0    | 14.65 | - | 17.16 | 4d 1D | - | 4p 3G | 2 | - | 3 |  |
| 494.0070Cu II | 160  | 14.34 | - | 16.85 | 4d 3P | - | 4f 3P | 1 | - | 0 |  |
| 494.0911Cu II | 0    | 13.43 | - | 15.94 | 5s 3D | - | 4p 3D | 2 | - | 2 |  |
| 494.3026Cu II | 631  | 14.34 | - | 16.85 | 4d 3P | - | 4f 3P | 2 | - | 1 |  |
| 494.3312Cu II | 2    | 13.43 | - | 15.94 | 5s 3D | - | 4p 3F | 2 | - | 3 |  |
| 494.9474Cu II | 4    | 14.34 | - | 16.85 | 4d 3P | - | 4f 3P | 1 | - | 1 |  |
| 495.0955Cu II | 200  | 14.62 | - | 17.12 | 4d 1G | - | 4f 3H | 4 | - | 4 |  |
| 495.1621Cu II | 3829 | 14.39 | - | 16.90 | 4d 3D | - | 4f 3G | 3 | - | 4 |  |
| 495.3724Cu II | 8280 | 14.62 | - | 17.12 | 4d 1G | - | 4f 1H | 4 | - | 5 |  |
| 495.5956Cu II | 0    | 14.34 | - | 16.84 | 4d 3G | - | 4p 3F | 4 | - | 4 |  |
| 495.7879Cu II | 1    | 14.20 | - | 16.70 | 4d 3S | - | 4p 3D | 1 | - | 2 |  |
| 496.8445Cu II | 1    | 14.46 | - | 16.96 | 4p 3G | - | 5d 3G | 3 | - | 4 |  |
| 496.9805Cu II | 0    | 14.42 | - | 16.92 | 4d 3F | - | 4p 3D | 3 | - | 3 |  |
| 497.1225Cu II | 3    | 14.46 | - | 16.96 | 4p 3G | - | 5d 3P | 3 | - | 2 |  |
| 497.3142Cu II | 8    | 14.76 | - | 17.25 | 4p 3F | - | 5d 3F | 2 | - | 2 |  |
| 497.3695Cu II | 509  | 14.62 | - | 17.11 | 4d 3D | - | 4f 3D | 1 | - | 1 |  |
| 497.4154Cu II | 382  | 14.65 | - | 17.14 | 4d 1D | - | 4f 3G | 2 | - | 3 |  |
| 497.5066Cu II | 4    | 14.34 | - | 16.83 | 4d 3P | - | 4p 3F | 2 | - | 3 |  |
| 497.7905Cu II | 0    | 15.94 | - | 18.43 | 4p 3F | - | 6d 3F | 3 | - | 2 |  |
| 497.8743Cu II | 1    | 14.76 | - | 17.25 | 4p 3F | - | 5d 1F | 2 | - | 3 |  |
| 498.0014Cu II | 122  | 14.62 | - | 17.11 | 4d 3D | - | 4f 1D | 1 | - | 2 |  |
| 498.0729Cu II | 1    | 15.94 | - | 18.43 | 4p 3F | - | 6d 1F | 3 | - | 3 |  |
| 498.0955Cu II | 0    | 14.34 | - | 16.83 | 4d 3G | - | 4p 3F | 4 | - | 3 |  |
| 498.1014Cu II | 2    | 14.43 | - | 16.92 | 4d 3F | - | 4p 3D | 4 | - | 3 |  |
| 498.3170Cu II | 0    | 15.94 | - | 18.43 | 4p 3D | - | 6d 1F | 2 | - | 3 |  |
| 498.4696Cu II | 0    | 14.62 | - | 17.10 | 4d 1G | - | 4p 3P | 4 | - | 4 |  |
| 498.5139Cu II | 0    | 14.43 | - | 16.92 | 4d 3D | - | 4p 3D | 2 | - | 3 |  |

|               |      |       |   |       |        |   |       |   |   |   |  |
|---------------|------|-------|---|-------|--------|---|-------|---|---|---|--|
| 498.5506Cu II | 556  | 14.39 | - | 16.88 | 4d 3D  | - | 4f 3F | 3 | - | 4 |  |
| 499.3553Cu II | 1    | 13.68 | - | 16.17 | 5s 1D  | - | 4p 3P | 2 | - | 2 |  |
| 499.5206Cu II | 59   | 14.65 | - | 17.13 | 4d 1D  | - | 4f 3F | 2 | - | 2 |  |
| 500.0904Cu II | 0    | 15.94 | - | 18.42 | 4p 3D  | - | 6d 1D | 2 | - | 2 |  |
| 500.2300Cu II | 5    | 14.62 | - | 17.10 | 4d 3D  | - | 4p 3S | 1 | - | 1 |  |
| 500.3265Cu II | 2    | 14.53 | - | 17.01 | 4d 1P  | - | 4p 1P | 1 | - | 1 |  |
| 500.6801Cu II | 3767 | 14.65 | - | 17.13 | 4d 1D  | - | 4f 1F | 2 | - | 3 |  |
| 500.9569Cu II | 1    | 15.94 | - | 18.41 | 4p 3F  | - | 6d 1G | 3 | - | 4 |  |
| 500.9851Cu II | 183  | 14.39 | - | 16.87 | 4d 3D  | - | 4f 3D | 3 | - | 3 |  |
| 501.0525Cu II | 0    | 15.94 | - | 18.41 | 4p 3D  | - | 6d 3D | 2 | - | 1 |  |
| 501.2620Cu II | 1055 | 14.42 | - | 16.90 | 4d 3F  | - | 4f 3G | 3 | - | 4 |  |
| 501.2816Cu II | 12   | 14.52 | - | 17.00 | 4p 3D  | - | 5d 3D | 2 | - | 2 |  |
| 501.3245Cu II | 1    | 14.76 | - | 17.23 | 4p 3F  | - | 5d 1D | 2 | - | 2 |  |
| 501.5220Cu II | 123  | 14.39 | - | 16.86 | 4d 3D  | - | 4f 3D | 3 | - | 2 |  |
| 501.8064Cu II | 0    | 15.94 | - | 18.41 | 4p 3F  | - | 6d 3G | 3 | - | 3 |  |
| 501.9149Cu II | 1    | 14.69 | - | 17.16 | 4d 1F  | - | 4p 3G | 3 | - | 3 |  |
| 502.0541Cu II | 1    | 15.94 | - | 18.41 | 4p 3D  | - | 6d 3G | 2 | - | 3 |  |
| 502.1279Cu II | 2366 | 14.39 | - | 16.86 | 4d 3D  | - | 4f 3F | 3 | - | 3 |  |
| 502.2604Cu II | 17   | 14.52 | - | 16.99 | 4p 3D  | - | 5d 3F | 2 | - | 3 |  |
| 502.3358Cu II | 0    | 14.60 | - | 17.07 | 4d 3G  | - | 4p 1D | 3 | - | 2 |  |
| 502.4023Cu II | 1803 | 14.43 | - | 16.90 | 4d 3F  | - | 4f 3G | 4 | - | 4 |  |
| 502.5853Cu II | 0    | 14.75 | - | 17.22 | 4p 1G  | - | 5d 1G | 4 | - | 4 |  |
| 503.0791Cu II | 1    | 14.39 | - | 16.86 | 4d 3D  | - | 4p 5S | 3 | - | 2 |  |
| 503.1297Cu II | 0    | 14.70 | - | 17.16 | 4d 3F  | - | 4p 3G | 2 | - | 3 |  |
| 503.2546Cu II | 64   | 14.65 | - | 17.11 | 4d 1D  | - | 4f 3D | 2 | - | 1 |  |
| 503.4173Cu II | 2    | 14.76 | - | 17.22 | 4p 3F  | - | 5d 3D | 2 | - | 1 |  |
| 503.6731Cu II | 1    | 14.20 | - | 16.66 | 4d 3S  | - | 4p 3P | 1 | - | 1 |  |
| 503.9016Cu II | 908  | 14.65 | - | 17.11 | 4d 1D  | - | 4f 1D | 2 | - | 2 |  |
| 504.1331Cu II | 437  | 14.39 | - | 16.85 | 4d 3D  | - | 4f 3P | 3 | - | 2 |  |
| 504.4278Cu II | 0    | 14.34 | - | 16.80 | 4d 3P  | - | 4p 3P | 1 | - | 0 |  |
| 504.7348Cu II | 4286 | 14.42 | - | 16.88 | 4d 3F  | - | 4f 3F | 3 | - | 4 |  |
| 505.0655Cu II | 0    | 11.85 | - | 14.30 | 4s2 1G | - | 4p 3G | 4 | - | 4 |  |
| 505.1793Cu II | 6715 | 14.43 | - | 16.88 | 4d 3F  | - | 4f 3G | 4 | - | 5 |  |
| 505.1901Cu II | 1    | 14.52 | - | 16.98 | 4p 3D  | - | 5d 3D | 2 | - | 3 |  |
| 505.2046Cu II | 1    | 15.98 | - | 18.43 | 4p 3D  | - | 6d 3F | 2 | - | 2 |  |
| 505.4347Cu II | 23   | 14.76 | - | 17.21 | 4p 3F  | - | 5d 3G | 2 | - | 3 |  |
| 505.4773Cu II | 172  | 14.69 | - | 17.14 | 4d 1F  | - | 4f 3G | 3 | - | 3 |  |
| 505.4955Cu II | 0    | 15.98 | - | 18.43 | 4p 3D  | - | 6d 1F | 2 | - | 3 |  |
| 505.8910Cu II | 431  | 14.43 | - | 16.88 | 4d 3F  | - | 4f 3F | 4 | - | 4 |  |
| 506.0740Cu II | 0    | 14.39 | - | 16.84 | 4d 3D  | - | 4p 3F | 3 | - | 4 |  |
| 506.1833Cu II | 4    | 14.65 | - | 17.10 | 4d 1D  | - | 4p 3S | 2 | - | 1 |  |



|               |      |       |   |       |       |   |       |   |   |   |
|---------------|------|-------|---|-------|-------|---|-------|---|---|---|
| 506.5459Cu II | 5808 | 14.69 | - | 17.14 | 4d 1F | - | 4f 1G | 3 | - | 4 |
| 506.7094Cu II | 3982 | 14.70 | - | 17.14 | 4d 3F | - | 4f 3G | 2 | - | 3 |
| 506.7629Cu II | 0    | 14.13 | - | 16.58 | 4p 5F | - | 6s 3D | 3 | - | 2 |
| 506.9431Cu II | 1    | 14.62 | - | 17.07 | 4d 3D | - | 4p 1D | 1 | - | 2 |
| 507.2302Cu II | 1578 | 14.42 | - | 16.87 | 4d 3F | - | 4f 3D | 3 | - | 3 |
| 507.6515Cu II | 59   | 14.69 | - | 17.13 | 4d 1F | - | 4f 3F | 3 | - | 2 |
| 507.7807Cu II | 185  | 14.42 | - | 16.86 | 4d 3F | - | 4f 3D | 3 | - | 2 |
| 508.1106Cu II | 1    | 13.65 | - | 16.09 | 5s 3D | - | 4p 3P | 1 | - | 1 |
| 508.2526Cu II | 29   | 14.99 | - | 17.43 | 5p 3P | - | 5d 1S | 1 | - | 0 |
| 508.3106Cu II | 0    | 15.98 | - | 18.41 | 4p 3D | - | 6d 3D | 2 | - | 1 |
| 508.3979Cu II | 35   | 14.43 | - | 16.87 | 4d 3F | - | 4f 3D | 4 | - | 3 |
| 508.4018Cu II | 23   | 14.42 | - | 16.86 | 4d 3F | - | 4f 3F | 3 | - | 3 |
| 508.6810Cu II | 10   | 14.39 | - | 16.83 | 4d 3D | - | 4p 3F | 3 | - | 3 |
| 508.8277Cu II | 3077 | 14.43 | - | 16.87 | 4d 3D | - | 4f 3D | 2 | - | 3 |
| 508.8490Cu II | 1256 | 14.69 | - | 17.13 | 4d 1F | - | 4f 1F | 3 | - | 3 |
| 508.8942Cu II | 1057 | 14.70 | - | 17.13 | 4d 3F | - | 4f 3F | 2 | - | 2 |
| 508.9498Cu II | 6    | 14.52 | - | 16.96 | 4p 3D | - | 5d 3P | 2 | - | 1 |
| 509.3415Cu II | 1    | 15.98 | - | 18.41 | 4p 3D | - | 6d 3G | 2 | - | 3 |
| 509.3816Cu II | 1334 | 14.43 | - | 16.86 | 4d 3D | - | 4f 3D | 2 | - | 2 |
| 509.4442Cu II | 3    | 14.52 | - | 16.96 | 4p 3D | - | 5d 3P | 2 | - | 2 |
| 509.5749Cu II | 284  | 14.43 | - | 16.86 | 4d 3F | - | 4f 3F | 4 | - | 3 |
| 510.0067Cu II | 350  | 14.43 | - | 16.86 | 4d 3D | - | 4f 3F | 2 | - | 3 |
| 510.0977Cu II | 120  | 14.70 | - | 17.13 | 4d 3F | - | 4f 1F | 2 | - | 3 |
| 510.2761Cu II | 1    | 14.69 | - | 17.12 | 4d 1F | - | 4f 3H | 3 | - | 4 |
| 510.4576Cu II | 1    | 14.42 | - | 16.85 | 4d 3F | - | 4f 3P | 3 | - | 2 |
| 510.8334Cu II | 183  | 14.43 | - | 16.86 | 4d 3D | - | 4f 1P | 2 | - | 1 |
| 510.8768Cu II | 1    | 14.53 | - | 16.96 | 4d 1P | - | 4p 3F | 1 | - | 2 |
| 511.0341Cu II | 122  | 14.43 | - | 16.85 | 4d 3F | - | 4f 3H | 4 | - | 5 |
| 511.2775Cu II | 1    | 14.76 | - | 17.18 | 4p 3F | - | 5d 1P | 2 | - | 1 |
| 511.5537Cu II | 3    | 14.64 | - | 17.06 | 4p 3D | - | 5d 3P | 1 | - | 0 |
| 512.0754Cu II | 170  | 14.43 | - | 16.85 | 4d 3D | - | 4f 3P | 2 | - | 2 |
| 512.1769Cu II | 73   | 14.69 | - | 17.11 | 4d 1F | - | 4f 1D | 3 | - | 2 |
| 512.3058Cu II | 0    | 16.01 | - | 18.43 | 4p 3D | - | 6d 1F | 3 | - | 3 |
| 512.4476Cu II | 0    | -     | - | -     | -     | - | -     | - | - | - |
| 512.4806Cu II | 0    | 15.98 | - | 18.39 | 4p 3D | - | 6d 1P | 2 | - | 1 |
| 512.7702Cu II | 84   | 14.70 | - | 17.11 | 4d 3F | - | 4f 3D | 2 | - | 1 |
| 512.7733Cu II | 0    | 14.34 | - | 16.75 | 4d 3P | - | 4p 3D | 2 | - | 1 |
| 513.0583Cu II | 2    | 14.65 | - | 17.07 | 4d 1D | - | 4p 1D | 2 | - | 2 |
| 513.3122Cu II | 1    | 14.43 | - | 16.85 | 4d 3D | - | 4f 3P | 2 | - | 1 |
| 513.4419Cu II | 41   | 14.70 | - | 17.11 | 4d 3F | - | 4f 1D | 2 | - | 2 |
| 513.4673Cu II | 1    | 14.34 | - | 16.75 | 4d 3P | - | 4p 3D | 1 | - | 1 |
| 513.6394Cu II | 0    | 14.43 | - | 16.84 | 4d 3F | - | 4p 3F | 4 | - | 4 |

|               |     |       |   |       |       |   |       |   |   |   |
|---------------|-----|-------|---|-------|-------|---|-------|---|---|---|
| 514.5120Cu II | 0   | 16.28 | - | 18.69 | 4p 5D | - | 8s 3D | 3 | - | 3 |
| 515.1207Cu II | 0   | 14.42 | - | 16.83 | 4d 3F | - | 4p 3F | 3 | - | 3 |
| 515.3574Cu II | 0   | 16.01 | - | 18.41 | 4p 3D | - | 6d 1G | 3 | - | 4 |
| 515.7258Cu II | 1   | 14.43 | - | 16.83 | 4p 3D | - | 6s 1D | 3 | - | 2 |
| 515.8093Cu II | 450 | 14.45 | - | 16.86 | 4d 3P | - | 4f 1P | 0 | - | 1 |
| 515.8111Cu II | 8   | 14.70 | - | 17.10 | 4d 3F | - | 4p 3S | 2 | - | 1 |
| 515.9097Cu II | 23  | 14.59 | - | 16.99 | 4p 3F | - | 5d 3F | 4 | - | 4 |
| 516.1678Cu II | 1   | 14.59 | - | 16.99 | 4p 3F | - | 5d 3F | 4 | - | 3 |
| 516.3251Cu II | 11  | 14.43 | - | 16.83 | 4d 3F | - | 4p 3F | 4 | - | 3 |
| 516.7683Cu II | 0   | 14.43 | - | 16.83 | 4d 3D | - | 4p 3F | 2 | - | 3 |
| 517.5965Cu II | 3   | 14.20 | - | 16.59 | 4d 3S | - | 4p 3P | 1 | - | 2 |
| 518.3367Cu II | 144 | 14.45 | - | 16.85 | 4d 3P | - | 4f 3P | 0 | - | 1 |
| 518.4053Cu II | 1   | 14.62 | - | 17.01 | 4d 3D | - | 4p 1P | 1 | - | 1 |
| 519.2624Cu II | 5   | 14.59 | - | 16.98 | 4p 3F | - | 5d 3D | 4 | - | 3 |
| 520.5107Cu II | 2   | 14.52 | - | 16.90 | 4p 3D | - | 5d 3S | 2 | - | 1 |
| 520.8215Cu II | 1   | 14.62 | - | 17.00 | 4d 1G | - | 4p 3G | 4 | - | 3 |
| 521.3980Cu II | 2   | 14.33 | - | 16.71 | 4d 3G | - | 4p 3H | 5 | - | 4 |
| 521.6396Cu II | 4   | 14.69 | - | 17.07 | 4d 1F | - | 4p 1D | 3 | - | 2 |
| 522.9519Cu II | 1   | 14.70 | - | 17.07 | 4d 3F | - | 4p 1D | 2 | - | 2 |
| 522.9707Cu II | 1   | 14.46 | - | 16.83 | 4p 3G | - | 6s 1D | 3 | - | 2 |
| 523.4493Cu II | 4   | 14.59 | - | 16.96 | 4p 3F | - | 5d 3G | 4 | - | 4 |
| 523.9549Cu II | 0   | 14.34 | - | 16.71 | 4d 3G | - | 4p 3H | 4 | - | 4 |
| 524.5342Cu II | 87  | 14.59 | - | 16.95 | 4p 3F | - | 5d 3G | 4 | - | 5 |
| 524.7114Cu II | 3   | 14.60 | - | 16.96 | 4d 3G | - | 4p 3F | 3 | - | 2 |
| 524.7976Cu II | 3   | 14.89 | - | 17.25 | 5p 3P | - | 5d 3F | 2 | - | 2 |
| 524.8019Cu II | 2   | 14.65 | - | 17.01 | 4d 1D | - | 4p 1P | 2 | - | 1 |
| 525.1544Cu II | 1   | 14.34 | - | 16.70 | 4d 3P | - | 4p 3D | 2 | - | 2 |
| 525.4214Cu II | 23  | 14.89 | - | 17.25 | 5p 3P | - | 5d 1F | 2 | - | 3 |
| 526.1046Cu II | 3   | 14.64 | - | 17.00 | 4p 3D | - | 5d 3D | 1 | - | 2 |
| 526.9991Cu II | 0   | -     | - | -     | -     | - | -     | - | - | - |
| 527.6525Cu II | 0   | -     | - | -     | -     | - | -     | - | - | - |
| 528.0958Cu II | 5   | 14.65 | - | 17.00 | 4p 3F | - | 5d 3D | 3 | - | 2 |
| 528.9110Cu II | 6   | 14.65 | - | 16.99 | 4p 3F | - | 5d 3F | 3 | - | 4 |
| 529.1823Cu II | 32  | 14.65 | - | 16.99 | 4p 3F | - | 5d 3F | 3 | - | 3 |
| 529.2654Cu II | 6   | 14.89 | - | 17.23 | 5p 3P | - | 5d 1D | 2 | - | 2 |
| 529.4369Cu II | 0   | 16.09 | - | 18.43 | 4p 3P | - | 6d 3F | 1 | - | 2 |
| 529.7404Cu II | 1   | 14.62 | - | 16.96 | 4d 3D | - | 4p 3F | 1 | - | 2 |
| 531.5987Cu II | 2   | 14.89 | - | 17.22 | 5p 3P | - | 5d 3D | 2 | - | 1 |
| 531.7610Cu II | 0   | 16.09 | - | 18.42 | 4p 3P | - | 6d 1D | 1 | - | 2 |
| 532.2606Cu II | 0   | 14.53 | - | 16.86 | 4d 1P | - | 4f 3D | 1 | - | 2 |
| 532.4355Cu II | 14  | 14.65 | - | 16.98 | 4p 3F | - | 5d 3D | 3 | - | 3 |
| 532.6292Cu II | 0   | 13.65 | - | 15.98 | 5s 3D | - | 4p 3D | 1 | - | 2 |

|               |     |       |   |       |       |   |       |   |   |   |
|---------------|-----|-------|---|-------|-------|---|-------|---|---|---|
| 533.2596Cu II | 2   | 14.43 | - | 16.75 | 4d 3D | - | 4p 3D | 2 | - | 1 |
| 533.8459Cu II | 1   | 14.53 | - | 16.86 | 4d 1P | - | 4f 1P | 1 | - | 1 |
| 533.8487Cu II | 1   | 14.89 | - | 17.21 | 5p 3P | - | 5d 3G | 2 | - | 3 |
| 534.0097Cu II | 0   | 14.34 | - | 16.66 | 4d 3P | - | 4p 3P | 2 | - | 1 |
| 534.5574Cu II | 3   | 14.64 | - | 16.96 | 4p 3D | - | 5d 3P | 1 | - | 1 |
| 534.7624Cu II | 1   | 14.34 | - | 16.66 | 4d 3P | - | 4p 3P | 1 | - | 1 |
| 535.1029Cu II | 0   | 14.64 | - | 16.96 | 4p 3D | - | 5d 3P | 1 | - | 2 |
| 535.1581Cu II | 1   | 14.70 | - | 17.01 | 4d 3F | - | 4p 1P | 2 | - | 1 |
| 535.2025Cu II | 46  | 14.53 | - | 16.85 | 4d 1P | - | 4f 3P | 1 | - | 2 |
| 535.4486Cu II | 36  | 14.53 | - | 16.85 | 4d 1P | - | 4f 3P | 1 | - | 0 |
| 535.6809Cu II | 0   | 14.39 | - | 16.71 | 4d 3D | - | 4p 3H | 3 | - | 4 |
| 536.4216Cu II | 3   | 14.65 | - | 16.96 | 4d 1D | - | 4p 3F | 2 | - | 2 |
| 536.5537Cu II | 76  | 14.53 | - | 16.85 | 4d 1P | - | 4f 3P | 1 | - | 1 |
| 536.6246Cu II | 1   | 14.52 | - | 16.83 | 4p 3D | - | 6s 1D | 2 | - | 2 |
| 536.8383Cu II | 98  | 14.65 | - | 16.96 | 4p 3F | - | 5d 3G | 3 | - | 4 |
| 537.1628Cu II | 9   | 14.65 | - | 16.96 | 4p 3F | - | 5d 3P | 3 | - | 2 |
| 537.6207Cu II | 1   | 14.39 | - | 16.70 | 4d 3D | - | 4p 3D | 3 | - | 2 |
| 537.6475Cu II | 0   | 14.69 | - | 17.00 | 4d 1F | - | 4p 3G | 3 | - | 3 |
| 538.6806Cu II | 0   | 14.62 | - | 16.92 | 4d 1G | - | 4p 3D | 4 | - | 3 |
| 538.6843Cu II | 1   | 14.45 | - | 16.75 | 4d 3P | - | 4p 3D | 0 | - | 1 |
| 539.3938Cu II | 2   | 14.52 | - | 16.82 | 4p 3D | - | 6s 3D | 2 | - | 1 |
| 539.7295Cu II | 38  | 14.60 | - | 16.90 | 4d 3G | - | 4f 3G | 3 | - | 4 |
| 540.3711Cu II | 11  | 14.89 | - | 17.18 | 5p 3P | - | 5d 1P | 2 | - | 1 |
| 540.7445Cu II | 4   | 13.68 | - | 15.98 | 5s 1D | - | 4p 3D | 2 | - | 2 |
| 540.8385Cu II | 7   | 13.65 | - | 15.94 | 5s 3D | - | 4p 3D | 1 | - | 2 |
| 541.6398Cu II | 1   | 14.96 | - | 17.25 | 5p 3F | - | 5d 3F | 3 | - | 2 |
| 542.3042Cu II | 3   | 14.96 | - | 17.25 | 5p 3F | - | 5d 1F | 3 | - | 3 |
| 542.8272Cu II | 0   | 14.42 | - | 16.71 | 4d 3F | - | 4p 3H | 3 | - | 4 |
| 543.7144Cu II | 45  | 14.62 | - | 16.90 | 4d 1G | - | 4f 3G | 4 | - | 4 |
| 543.7579Cu II | 165 | 14.60 | - | 16.88 | 4d 3G | - | 4f 3F | 3 | - | 4 |
| 544.0071Cu II | 1   | 15.94 | - | 18.22 | 4p 3F | - | 7s 1D | 3 | - | 2 |
| 544.1648Cu II | 1   | 14.43 | - | 16.71 | 4d 3F | - | 4p 3H | 4 | - | 4 |
| 544.8193Cu II | 1   | 14.42 | - | 16.70 | 4d 3F | - | 4p 3D | 3 | - | 2 |
| 544.9406Cu II | 4   | 14.34 | - | 16.61 | 4d 3P | - | 4p 3D | 2 | - | 3 |
| 545.4136Cu II | 1   | 14.98 | - | 17.25 | 5p 3F | - | 5d 1F | 4 | - | 3 |
| 545.6472Cu II | 0   | 14.34 | - | 16.61 | 4d 3G | - | 4p 3D | 4 | - | 3 |
| 545.7888Cu II | 1   | 15.94 | - | 18.21 | 4p 3D | - | 7s 3D | 2 | - | 1 |
| 545.8094Cu II | 8   | 14.69 | - | 16.96 | 4d 1F | - | 4p 3F | 3 | - | 2 |
| 546.4002Cu II | 1   | 14.96 | - | 17.23 | 5p 3F | - | 5d 1D | 3 | - | 2 |
| 546.6552Cu II | 91  | 14.60 | - | 16.87 | 4d 3G | - | 4f 3D | 3 | - | 3 |
| 546.6626Cu II | 1   | 14.43 | - | 16.70 | 4d 3D | - | 4p 3D | 2 | - | 2 |

|               |     |       |   |       |       |   |       |   |   |   |
|---------------|-----|-------|---|-------|-------|---|-------|---|---|---|
| 546.9683Cu II | 117 | 14.62 | - | 16.88 | 4d 1G | - | 4f 3G | 4 | - | 5 |
| 547.2463Cu II | 1   | 14.70 | - | 16.96 | 4d 3F | - | 4p 3F | 2 | - | 2 |
| 547.2946Cu II | 12  | 14.60 | - | 16.86 | 4d 3G | - | 4f 3D | 3 | - | 2 |
| 547.3124Cu II | 9   | 14.99 | - | 17.25 | 4p 1D | - | 5d 3F | 2 | - | 2 |
| 547.3256Cu II | 1   | 14.64 | - | 16.90 | 4p 3D | - | 5d 3S | 1 | - | 1 |
|               |     |       |   |       |       |   |       |   |   |   |
| 547.6103Cu II | 0   | 16.17 | - | 18.43 | 4p 3P | - | 6d 3F | 2 | - | 2 |
| 547.7128Cu II | 2   | 14.53 | - | 16.80 | 4d 1P | - | 4p 3P | 1 | - | 0 |
| 547.8027Cu II | 40  | 14.62 | - | 16.88 | 4d 1G | - | 4f 3F | 4 | - | 4 |
| 547.9521Cu II | 1   | 16.17 | - | 18.43 | 4p 3P | - | 6d 1F | 2 | - | 3 |
| 547.9908Cu II | 55  | 14.99 | - | 17.25 | 4p 1D | - | 5d 1F | 2 | - | 3 |
|               |     |       |   |       |       |   |       |   |   |   |
| 548.0162Cu II | 1   | 14.60 | - | 16.86 | 4d 3G | - | 4f 3F | 3 | - | 3 |
| 548.2527Cu II | 0   | 14.30 | - | 16.56 | 4p 3G | - | 6s 3D | 4 | - | 3 |
| 548.6205Cu II | 2   | 14.99 | - | 17.25 | 5p 3P | - | 5d 3F | 1 | - | 2 |
| 549.2078Cu II | 0   | 13.68 | - | 15.94 | 5s 1D | - | 4p 3D | 2 | - | 2 |
| 549.3527Cu II | 1   | 14.96 | - | 17.22 | 5p 3F | - | 5d 1G | 3 | - | 4 |
|               |     |       |   |       |       |   |       |   |   |   |
| 549.5046Cu II | 6   | 13.68 | - | 15.94 | 5s 1D | - | 4p 3F | 2 | - | 3 |
| 549.6869Cu II | 4   | 14.34 | - | 16.59 | 4d 3P | - | 4p 3P | 2 | - | 2 |
| 550.0972Cu II | 0   | 16.17 | - | 18.42 | 4p 3P | - | 6d 1D | 2 | - | 2 |
| 550.4845Cu II | 1   | 14.34 | - | 16.59 | 4d 3P | - | 4p 3P | 1 | - | 2 |
| 550.7434Cu II | 4   | 14.62 | - | 16.87 | 4d 1G | - | 4f 3D | 4 | - | 3 |
|               |     |       |   |       |       |   |       |   |   |   |
| 551.2864Cu II | 5   | 14.96 | - | 17.21 | 5p 3F | - | 5d 3G | 3 | - | 3 |
| 552.1249Cu II | 11  | 14.62 | - | 16.86 | 4d 1G | - | 4f 3F | 4 | - | 3 |
| 552.1735Cu II | 44  | 14.99 | - | 17.23 | 4p 1D | - | 5d 1D | 2 | - | 2 |
| 552.5436Cu II | 9   | 14.98 | - | 17.22 | 5p 3F | - | 5d 1G | 4 | - | 4 |
| 552.7680Cu II | 4   | 14.62 | - | 16.86 | 4d 3D | - | 4f 3D | 1 | - | 2 |
|               |     |       |   |       |       |   |       |   |   |   |
| 552.8740Cu II | 1   | 15.98 | - | 18.22 | 4p 3D | - | 7s 1D | 2 | - | 2 |
| 553.4677Cu II | 7   | 15.01 | - | 17.25 | 4p 1F | - | 5d 3F | 3 | - | 2 |
| 553.5050Cu II | 136 | 14.99 | - | 17.23 | 5p 3P | - | 5d 1D | 1 | - | 2 |
| 553.7667Cu II | 4   | 14.75 | - | 16.99 | 4p 1G | - | 5d 3F | 4 | - | 4 |
| 553.8384Cu II | 40  | 14.62 | - | 16.85 | 4d 1G | - | 4f 3H | 4 | - | 5 |
|               |     |       |   |       |       |   |       |   |   |   |
| 554.0640Cu II | 0   | 14.75 | - | 16.99 | 4p 1G | - | 5d 3F | 4 | - | 3 |
| 554.1615Cu II | 66  | 15.01 | - | 17.25 | 4p 1F | - | 5d 1F | 3 | - | 3 |
| 554.3539Cu II | 25  | 14.76 | - | 17.00 | 4p 3F | - | 5d 3D | 2 | - | 2 |
| 554.4120Cu II | 0   | 15.98 | - | 18.21 | 4p 3D | - | 7s 3D | 2 | - | 1 |
| 554.4781Cu II | 6   | 14.62 | - | 16.86 | 4d 3D | - | 4f 1P | 1 | - | 1 |
|               |     |       |   |       |       |   |       |   |   |   |
| 554.4999Cu II | 1   | 14.98 | - | 17.21 | 5p 3F | - | 5d 3G | 4 | - | 3 |
| 554.7136Cu II | 1   | 14.99 | - | 17.22 | 4p 1D | - | 5d 3D | 2 | - | 1 |
| 554.9147Cu II | 0   | 15.94 | - | 18.17 | 4p 3F | - | 6d 3D | 3 | - | 2 |
| 555.2177Cu II | 0   | 15.94 | - | 18.17 | 4p 3D | - | 6d 3D | 2 | - | 2 |
| 555.4919Cu II | 1   | 15.94 | - | 18.17 | 4p 3F | - | 6d 3F | 3 | - | 3 |
|               |     |       |   |       |       |   |       |   |   |   |
| 555.5513Cu II | 43  | 14.76 | - | 16.99 | 4p 3F | - | 5d 3F | 2 | - | 3 |
| 555.7954Cu II | 0   | 15.94 | - | 18.17 | 4p 3D | - | 6d 3F | 2 | - | 3 |

|               |     |       |   |       |       |   |       |   |   |   |
|---------------|-----|-------|---|-------|-------|---|-------|---|---|---|
| 555.8310Cu II | 1   | 14.60 | - | 16.83 | 4d 3G | - | 4p 3F | 3 | - | 3 |
| 555.9417Cu II | 1   | 14.62 | - | 16.85 | 4d 3D | - | 4f 3P | 1 | - | 2 |
| 556.0573Cu II | 23  | 14.99 | - | 17.22 | 5p 3P | - | 5d 3D | 1 | - | 1 |
| 556.2073Cu II | 1   | 14.62 | - | 16.85 | 4d 3D | - | 4f 3P | 1 | - | 0 |
| 556.2647Cu II | 1   | 14.43 | - | 16.66 | 4d 3D | - | 4p 3P | 2 | - | 1 |
| 557.1639Cu II | 2   | 14.99 | - | 17.21 | 4p 1D | - | 5d 3G | 2 | - | 3 |
| 557.3586Cu II | 0   | 15.94 | - | 18.16 | 4p 3F | - | 6d 3D | 3 | - | 3 |
| 557.3998Cu II | 1   | 14.62 | - | 16.85 | 4d 3D | - | 4f 3P | 1 | - | 1 |
| 557.6313Cu II | 1   | 14.75 | - | 16.98 | 4p 1G | - | 5d 3D | 4 | - | 3 |
| 557.6642Cu II | 0   | 15.94 | - | 18.16 | 4p 3D | - | 6d 3D | 2 | - | 3 |
| 558.3760Cu II | 10  | 14.39 | - | 16.61 | 4d 3D | - | 4p 3D | 3 | - | 3 |
| 558.3867Cu II | 1   | 14.53 | - | 16.75 | 4d 1P | - | 4p 3D | 1 | - | 1 |
| 558.4393Cu II | 5   | 15.01 | - | 17.23 | 4p 1F | - | 5d 1D | 3 | - | 2 |
| 559.1379Cu II | 2   | 14.76 | - | 16.98 | 4p 3F | - | 5d 3D | 2 | - | 3 |
| 559.3772Cu II | 76  | 14.65 | - | 16.87 | 4d 1D | - | 4f 3D | 2 | - | 3 |
| 559.6329Cu II | 1   | 15.94 | - | 18.15 | 4p 3F | - | 6d 3G | 3 | - | 4 |
| 559.8713Cu II | 0   | 15.94 | - | 18.15 | 4p 3F | - | 6d 3P | 3 | - | 2 |
| 560.0467Cu II | 24  | 14.65 | - | 16.86 | 4d 1D | - | 4f 3D | 2 | - | 2 |
| 560.0581Cu II | 5   | 14.62 | - | 16.83 | 4d 1G | - | 4p 3F | 4 | - | 3 |
| 560.1797Cu II | 0   | 15.94 | - | 18.15 | 4p 3D | - | 6d 3P | 2 | - | 2 |
| 560.8023Cu II | 31  | 14.65 | - | 16.86 | 4d 1D | - | 4f 3F | 2 | - | 3 |
| 561.0310Cu II | 0   | 16.01 | - | 18.22 | 4p 3D | - | 7s 1D | 3 | - | 2 |
| 561.5236Cu II | 141 | 15.01 | - | 17.22 | 4p 1F | - | 5d 1G | 3 | - | 4 |
| 561.8021Cu II | 3   | 14.65 | - | 16.86 | 4d 1D | - | 4f 1P | 2 | - | 1 |
| 561.9890Cu II | 0   | 14.65 | - | 16.86 | 4d 1D | - | 4p 5S | 2 | - | 2 |
| 562.0782Cu II | 28  | 14.69 | - | 16.90 | 4d 1F | - | 4f 3G | 3 | - | 4 |
| 562.1701Cu II | 1   | 14.45 | - | 16.66 | 4d 3P | - | 4p 3P | 0 | - | 1 |
| 562.2207Cu II | 1   | 15.97 | - | 18.17 | 4p 3F | - | 6d 3F | 4 | - | 4 |
| 562.4626Cu II | 1   | 14.75 | - | 16.96 | 4p 1G | - | 5d 3G | 4 | - | 4 |
| 563.3047Cu II | 26  | 14.65 | - | 16.85 | 4d 1D | - | 4f 3P | 2 | - | 2 |
| 563.3603Cu II | 2   | 14.39 | - | 16.59 | 4d 3D | - | 4p 3P | 3 | - | 2 |
| 563.5441Cu II | 4   | 15.01 | - | 17.21 | 4p 1F | - | 5d 3G | 3 | - | 3 |
| 563.7155Cu II | 15  | 14.75 | - | 16.95 | 4p 1G | - | 5d 3G | 4 | - | 5 |
| 563.7470Cu II | 13  | 14.76 | - | 16.96 | 4p 3F | - | 5d 3P | 2 | - | 1 |
| 564.1265Cu II | 488 | 15.23 | - | 17.43 | 5p 1P | - | 5d 1S | 1 | - | 0 |
| 564.1438Cu II | 0   | 15.98 | - | 18.17 | 4p 3D | - | 6d 3D | 2 | - | 2 |
| 564.2392Cu II | 1   | 15.97 | - | 18.16 | 4p 3F | - | 6d 3D | 4 | - | 3 |
| 564.2724Cu II | 4   | 14.99 | - | 17.18 | 4p 1D | - | 5d 1P | 2 | - | 1 |
| 564.3537Cu II | 9   | 14.76 | - | 16.96 | 4p 3F | - | 5d 3P | 2 | - | 2 |
| 564.7403Cu II | 0   | 15.98 | - | 18.17 | 4p 3D | - | 6d 3F | 2 | - | 3 |
| 564.8017Cu II | 4   | 14.65 | - | 16.85 | 4d 1D | - | 4f 3P | 2 | - | 1 |
| 564.8524Cu II | 0   | 16.24 | - | 18.43 | 4p 5D | - | 6d 3F | 2 | - | 2 |

|               |     |       |   |       |       |   |       |   |   |   |
|---------------|-----|-------|---|-------|-------|---|-------|---|---|---|
| 565.1710Cu II | 1   | 14.64 | - | 16.83 | 4p 3D | - | 6s 1D | 1 | - | 2 |
| 565.2160Cu II | 0   | 16.24 | - | 18.43 | 4p 5D | - | 6d 1F | 2 | - | 3 |
| 565.6629Cu II | 102 | 14.99 | - | 17.18 | 5p 3P | - | 5d 1P | 1 | - | 1 |
| 566.1451Cu II | 1   | 14.42 | - | 16.61 | 4d 3F | - | 4p 3D | 3 | - | 3 |
| 566.4484Cu II | 3   | 14.69 | - | 16.88 | 4d 1F | - | 4f 3F | 3 | - | 4 |
| 566.5277Cu II | 0   | 15.94 | - | 18.13 | 4p 3D | - | 6d 3S | 2 | - | 1 |
| 566.5701Cu II | 1   | 15.97 | - | 18.15 | 4p 3F | - | 6d 3G | 4 | - | 4 |
| 566.6699Cu II | 1   | 15.98 | - | 18.16 | 4p 3D | - | 6d 3D | 2 | - | 3 |
| 567.2290Cu II | 3   | 15.97 | - | 18.15 | 4p 3F | - | 6d 3G | 4 | - | 5 |
| 567.4695Cu II | 1   | 14.65 | - | 16.83 | 4p 3F | - | 6s 1D | 3 | - | 2 |
| 567.4703Cu II | 1   | 15.07 | - | 17.25 | 5p 3D | - | 5d 3F | 3 | - | 2 |
| 567.6001Cu II | 11  | 14.43 | - | 16.61 | 4d 3F | - | 4p 3D | 4 | - | 3 |
| 568.1358Cu II | 0   | 14.43 | - | 16.61 | 4d 3D | - | 4p 3D | 2 | - | 3 |
| 568.1997Cu II | 3   | 15.07 | - | 17.25 | 5p 3D | - | 5d 1F | 3 | - | 3 |
| 568.2434Cu II | 3   | 14.64 | - | 16.82 | 4p 3D | - | 6s 3D | 1 | - | 1 |
| 568.8678Cu II | 0   | 15.98 | - | 18.15 | 4p 3D | - | 6d 3P | 2 | - | 1 |
| 569.2674Cu II | 1   | 15.98 | - | 18.15 | 4p 3D | - | 6d 3P | 2 | - | 2 |
| 569.4525Cu II | 2   | 14.62 | - | 16.80 | 4d 3D | - | 4p 3P | 1 | - | 0 |
| 569.5933Cu II | 1   | 14.69 | - | 16.87 | 4d 1F | - | 4f 3D | 3 | - | 3 |
| 570.0288Cu II | 1   | 16.24 | - | 18.41 | 4p 5D | - | 6d 3G | 2 | - | 3 |
| 570.2875Cu II | 1   | 14.69 | - | 16.86 | 4d 1F | - | 4f 3D | 3 | - | 2 |
| 571.0710Cu II | 11  | 14.69 | - | 16.86 | 4d 1F | - | 4f 3F | 3 | - | 3 |
| 571.1583Cu II | 1   | 14.70 | - | 16.87 | 4d 3F | - | 4f 3D | 2 | - | 3 |
| 571.2697Cu II | 1   | 14.42 | - | 16.59 | 4d 3F | - | 4p 3P | 3 | - | 2 |
| 571.8563Cu II | 1   | 14.70 | - | 16.86 | 4d 3F | - | 4f 3D | 2 | - | 2 |
| 572.3016Cu II | 0   | 14.69 | - | 16.86 | 4d 1F | - | 4p 5S | 3 | - | 2 |
| 572.6393Cu II | 0   | 16.01 | - | 18.17 | 4p 3D | - | 6d 3D | 3 | - | 2 |
| 572.6441Cu II | 7   | 14.70 | - | 16.86 | 4d 3F | - | 4f 3F | 2 | - | 3 |
| 573.1000Cu II | 1   | 14.53 | - | 16.70 | 4d 1P | - | 4p 3D | 1 | - | 2 |
| 573.1444Cu II | 1   | 16.01 | - | 18.17 | 4p 3D | - | 6d 3F | 3 | - | 4 |
| 573.2539Cu II | 1   | 16.01 | - | 18.17 | 4p 3D | - | 6d 3F | 3 | - | 3 |
| 573.2967Cu II | 1   | 14.43 | - | 16.59 | 4d 3D | - | 4p 3P | 2 | - | 2 |
| 573.6661Cu II | 3   | 14.69 | - | 16.85 | 4d 1F | - | 4f 3P | 3 | - | 2 |
| 573.6867Cu II | 0   | 14.70 | - | 16.86 | 4d 3F | - | 4f 1P | 2 | - | 1 |
| 573.8816Cu II | 0   | 14.70 | - | 16.86 | 4d 3F | - | 4p 5S | 2 | - | 2 |
| 575.2422Cu II | 0   | 16.01 | - | 18.16 | 4p 3D | - | 6d 3D | 3 | - | 3 |
| 575.2536Cu II | 5   | 14.70 | - | 16.85 | 4d 3F | - | 4f 3P | 2 | - | 2 |
| 575.8242Cu II | 1   | 15.98 | - | 18.13 | 4p 3D | - | 6d 3S | 2 | - | 1 |
| 575.9421Cu II | 80  | 15.07 | - | 17.22 | 5p 3D | - | 5d 1G | 3 | - | 4 |
| 576.1218Cu II | 2   | 14.43 | - | 16.58 | 4p 3D | - | 6s 3D | 3 | - | 2 |
| 576.6048Cu II | 0   | 16.09 | - | 18.24 | 4p 3P | - | 6d 3P | 1 | - | 0 |

|               |      |       |   |       |       |   |       |   |   |   |
|---------------|------|-------|---|-------|-------|---|-------|---|---|---|
| 576.8148Cu II | 2    | 14.70 | - | 16.85 | 4d 3F | - | 4f 3P | 2 | - | 1 |
| 577.2513Cu II | 0    | 16.28 | - | 18.43 | 4p 5D | - | 6d 1F | 3 | - | 3 |
| 577.6651Cu II | 1    | 16.01 | - | 18.15 | 4p 3D | - | 6d 3G | 3 | - | 4 |
| 577.9662Cu II | 5    | 14.76 | - | 16.90 | 4p 3F | - | 5d 3S | 2 | - | 1 |
| 578.0679Cu II | 2    | 15.07 | - | 17.21 | 5p 3D | - | 5d 3G | 3 | - | 3 |
|               |      |       |   |       |       |   |       |   |   |   |
| 578.3920Cu II | 134  | 15.29 | - | 17.43 | 5p 3D | - | 5d 1S | 1 | - | 0 |
| 579.5623Cu II | 1    | 14.69 | - | 16.83 | 4d 1F | - | 4p 3F | 3 | - | 3 |
| 580.0970Cu II | 0    | 13.43 | - | 15.57 | 5s 3D | - | 4p 5P | 2 | - | 1 |
| 580.1120Cu II | 1    | 13.39 | - | 15.53 | 5s 3D | - | 4p 5P | 3 | - | 2 |
| 580.5989Cu II | 6    | 14.43 | - | 16.56 | 4p 3D | - | 6s 3D | 3 | - | 3 |
|               |      |       |   |       |       |   |       |   |   |   |
| 580.7191Cu II | 2    | 13.39 | - | 15.53 | 5s 3D | - | 4p 5P | 3 | - | 3 |
| 580.9995Cu II | 0    | 14.62 | - | 16.75 | 4d 3D | - | 4p 3D | 1 | - | 1 |
| 581.1287Cu II | 1    | 16.28 | - | 18.41 | 4p 5D | - | 6d 1G | 3 | - | 4 |
| 581.1826Cu II | 0    | 14.70 | - | 16.83 | 4d 3F | - | 4p 3F | 2 | - | 3 |
| 582.2721Cu II | 0    | 16.28 | - | 18.41 | 4p 5D | - | 6d 3G | 3 | - | 3 |
|               |      |       |   |       |       |   |       |   |   |   |
| 582.5826Cu II | 271  | 15.12 | - | 17.25 | 5p 3D | - | 5d 3F | 2 | - | 2 |
| 583.3515Cu II | 152  | 15.12 | - | 17.25 | 5p 3D | - | 5d 1F | 2 | - | 3 |
| 583.6622Cu II | 0    | 14.53 | - | 16.66 | 4d 1P | - | 4p 3P | 1 | - | 1 |
| 583.7315Cu II | 0    | 16.09 | - | 18.21 | 4p 3P | - | 7s 3D | 1 | - | 1 |
| 585.1778Cu II | 0    | 14.46 | - | 16.58 | 4p 3G | - | 6s 3D | 3 | - | 2 |
|               |      |       |   |       |       |   |       |   |   |   |
| 588.0936Cu II | 12   | 15.12 | - | 17.23 | 5p 3D | - | 5d 1D | 2 | - | 2 |
| 588.7212Cu II | 4    | 14.89 | - | 17.00 | 5p 3P | - | 5d 3D | 2 | - | 2 |
| 589.0460Cu II | 2    | 14.65 | - | 16.75 | 4d 1D | - | 4p 3D | 2 | - | 1 |
| 589.5798Cu II | 0    | 16.59 | - | 18.69 | 4p 3P | - | 8s 3D | 2 | - | 2 |
| 589.7971Cu II | 4    | 14.46 | - | 16.56 | 4p 3G | - | 6s 3D | 3 | - | 3 |
|               |      |       |   |       |       |   |       |   |   |   |
| 590.0718Cu II | 0    | 14.89 | - | 16.99 | 5p 3P | - | 5d 3F | 2 | - | 3 |
| 590.9584Cu II | 3    | 16.59 | - | 18.69 | 4p 3P | - | 8s 3D | 2 | - | 3 |
| 590.9757Cu II | 52   | 15.12 | - | 17.22 | 5p 3D | - | 5d 3D | 2 | - | 1 |
| 591.1146Cu II | 0    | 13.43 | - | 15.53 | 5s 3D | - | 4p 5P | 2 | - | 2 |
| 591.7450Cu II | 0    | 13.43 | - | 15.53 | 5s 3D | - | 4p 5P | 2 | - | 3 |
|               |      |       |   |       |       |   |       |   |   |   |
| 592.9639Cu II | 0    | 14.62 | - | 16.71 | 4d 1G | - | 4p 3H | 4 | - | 4 |
| 593.7577Cu II | 418  | 15.12 | - | 17.21 | 5p 3D | - | 5d 3G | 2 | - | 3 |
| 594.1196Cu II | 1295 | 14.89 | - | 16.98 | 5p 3P | - | 5d 3D | 2 | - | 3 |
| 594.5299Cu II | 0    | 16.09 | - | 18.17 | 4p 3P | - | 6d 3D | 1 | - | 2 |
| 595.1395Cu II | 1    | 16.61 | - | 18.69 | 4p 3D | - | 8s 3D | 3 | - | 2 |
|               |      |       |   |       |       |   |       |   |   |   |
| 596.5442Cu II | 9    | 16.61 | - | 18.69 | 4p 3D | - | 8s 3D | 3 | - | 3 |
| 596.9456Cu II | 1    | 14.62 | - | 16.70 | 4d 3D | - | 4p 3D | 1 | - | 2 |
| 597.7852Cu II | 0    | 16.95 | - | 19.03 | 5d 3G | - | 6f 1H | 5 | - | 5 |
| 597.9019Cu II | 2    | 14.76 | - | 16.83 | 4p 3F | - | 6s 1D | 2 | - | 2 |
| 598.8309Cu II | 564  | 14.99 | - | 17.06 | 5p 3P | - | 5d 3P | 1 | - | 0 |
|               |      |       |   |       |       |   |       |   |   |   |
| 599.0015Cu II | 0    | 16.96 | - | 19.03 | 5d 3G | - | 6f 3H | 4 | - | 4 |
| 599.2007Cu II | 3    | 16.96 | - | 19.03 | 5d 3G | - | 6f 1H | 4 | - | 5 |

|               |      |       |   |       |       |   |       |   |   |   |  |
|---------------|------|-------|---|-------|-------|---|-------|---|---|---|--|
| 599.3260Cu II | 211  | 14.89 | - | 16.96 | 5p 3P | - | 5d 3P | 2 | - | 1 |  |
| 599.5587Cu II | 548  | 15.15 | - | 17.22 | 5p 3P | - | 5d 3D | 0 | - | 1 |  |
| 599.7789Cu II | 0    | 16.09 | - | 18.15 | 4p 3P | - | 6d 3P | 1 | - | 1 |  |
| 600.0120Cu II | 1991 | 14.89 | - | 16.96 | 5p 3P | - | 5d 3P | 2 | - | 2 |  |
| 600.2305Cu II | 25   | 16.56 | - | 18.63 | 6s 3D | - | 4p 3F | 3 | - | 2 |  |
| 601.3416Cu II | 7    | 14.76 | - | 16.82 | 4p 3F | - | 6s 3D | 2 | - | 1 |  |
| 601.8373Cu II | 21   | 15.12 | - | 17.18 | 5p 3D | - | 5d 1P | 2 | - | 1 |  |
| 602.1245Cu II | 1    | 14.70 | - | 16.75 | 4d 3F | - | 4p 3D | 2 | - | 1 |  |
| 602.3264Cu II | 6    | 14.52 | - | 16.58 | 4p 3D | - | 6s 3D | 2 | - | 2 |  |
| 602.4416Cu II | 1    | 14.53 | - | 16.59 | 4d 1P | - | 4p 3P | 1 | - | 2 |  |
| 604.0650Cu II | 1    | 16.17 | - | 18.22 | 4p 3P | - | 7s 1D | 2 | - | 2 |  |
| 604.5799Cu II | 0    | 16.98 | - | 19.03 | 5d 3D | - | 6f 3H | 3 | - | 4 |  |
| 605.0918Cu II | 26   | 16.58 | - | 18.63 | 6s 3D | - | 4p 3F | 2 | - | 2 |  |
| 605.4431Cu II | 1    | 14.65 | - | 16.70 | 4d 1D | - | 4p 3D | 2 | - | 2 |  |
| 607.2218Cu II | 3    | 14.52 | - | 16.56 | 4p 3D | - | 6s 3D | 2 | - | 3 |  |
| 607.5169Cu II | 0    | 16.09 | - | 18.13 | 4p 3P | - | 6d 3S | 1 | - | 1 |  |
| 608.0343Cu II | 0    | -     | - | -     | -     | - | -     | - | - | - |  |
| 608.4139Cu II | 1    | 14.62 | - | 16.66 | 4d 3D | - | 4p 3P | 1 | - | 1 |  |
| 608.7481Cu II | 1    | 16.66 | - | 18.69 | 4p 3P | - | 8s 3D | 1 | - | 2 |  |
| 608.8298Cu II | 5    | 16.99 | - | 19.03 | 5d 3F | - | 6f 3H | 3 | - | 4 |  |
| 609.1893Cu II | 0    | 16.99 | - | 19.03 | 5d 3F | - | 6f 3H | 4 | - | 4 |  |
| 609.3952Cu II | 3    | 16.99 | - | 19.03 | 5d 3F | - | 6f 1H | 4 | - | 5 |  |
| 609.7325Cu II | 515  | 15.22 | - | 17.25 | 5p 3F | - | 5d 3F | 2 | - | 2 |  |
| 609.9990Cu II | 195  | 14.96 | - | 17.00 | 5p 3F | - | 5d 3D | 3 | - | 2 |  |
| 610.5746Cu II | 196  | 15.22 | - | 17.25 | 5p 3F | - | 5d 1F | 2 | - | 3 |  |
| 610.7412Cu II | 455  | 15.15 | - | 17.18 | 5p 3P | - | 5d 1P | 0 | - | 1 |  |
| 611.0872Cu II | 99   | 14.96 | - | 16.99 | 5p 3F | - | 5d 3F | 3 | - | 4 |  |
| 611.4493Cu II | 1316 | 14.96 | - | 16.99 | 5p 3F | - | 5d 3F | 3 | - | 3 |  |
| 612.4378Cu II | 1    | 15.94 | - | 17.96 | 4p 3F | - | 7s 3D | 3 | - | 2 |  |
| 612.8068Cu II | 0    | 15.94 | - | 17.96 | 4p 3D | - | 7s 3D | 2 | - | 2 |  |
| 614.2956Cu II | 25   | 15.23 | - | 17.25 | 5p 1P | - | 5d 3F | 1 | - | 2 |  |
| 615.0025Cu II | 1    | 15.94 | - | 17.95 | 4p 3F | - | 7s 3D | 3 | - | 3 |  |
| 615.0384Cu II | 1695 | 14.98 | - | 16.99 | 5p 3F | - | 5d 3F | 4 | - | 4 |  |
| 615.3746Cu II | 0    | 15.94 | - | 17.95 | 4p 3D | - | 7s 3D | 2 | - | 3 |  |
| 615.4051Cu II | 34   | 14.98 | - | 16.99 | 5p 3F | - | 5d 3F | 4 | - | 3 |  |
| 615.4222Cu II | 1480 | 14.89 | - | 16.90 | 5p 3P | - | 5d 3S | 2 | - | 1 |  |
| 615.7076Cu II | 1    | 14.60 | - | 16.61 | 4d 3G | - | 4p 3D | 3 | - | 3 |  |
| 615.7717Cu II | 177  | 15.22 | - | 17.23 | 5p 3F | - | 5d 1D | 2 | - | 2 |  |
| 615.7968Cu II | 15   | 14.96 | - | 16.98 | 5p 3F | - | 5d 3D | 3 | - | 3 |  |
| 617.2037Cu II | 929  | 14.99 | - | 17.00 | 4p 1D | - | 5d 3D | 2 | - | 2 |  |
| 617.4291Cu II | 3    | 14.69 | - | 16.70 | 4d 1F | - | 4p 3D | 3 | - | 2 |  |
| 617.5439Cu II | 0    | 16.17 | - | 18.17 | 4p 3P | - | 6d 3D | 2 | - | 2 |  |



|                |      |       |   |       |       |   |       |   |   |   |  |
|----------------|------|-------|---|-------|-------|---|-------|---|---|---|--|
| 618.2587 Cu II | 0    | 16.17 | - | 18.17 | 4p 3P | - | 6d 3F | 2 | - | 3 |  |
| 618.6884 Cu II | 1446 | 14.99 | - | 16.99 | 4p 1D | - | 5d 3F | 2 | - | 3 |  |
| 618.7420 Cu II | 0    | 16.23 | - | 18.24 | 4p 5D | - | 6d 3P | 1 | - | 0 |  |
| 618.8676 Cu II | 929  | 14.99 | - | 17.00 | 5p 3P | - | 5d 3D | 1 | - | 2 |  |
| 618.9322 Cu II | 56   | 15.22 | - | 17.22 | 5p 3F | - | 5d 3D | 2 | - | 1 |  |
| 619.2684 Cu II | 1    | 14.70 | - | 16.70 | 4d 3F | - | 4p 3D | 2 | - | 2 |  |
| 619.8092 Cu II | 333  | 14.98 | - | 16.98 | 5p 3F | - | 5d 3D | 4 | - | 3 |  |
| 619.9751 Cu II | 111  | 15.25 | - | 17.25 | 5p 1F | - | 5d 3F | 3 | - | 2 |  |
| 620.4261 Cu II | 1217 | 15.23 | - | 17.23 | 5p 1P | - | 5d 1D | 1 | - | 2 |  |
| 620.5720 Cu II | 1    | 16.17 | - | 18.16 | 4p 3P | - | 6d 3D | 2 | - | 3 |  |
| 620.6789 Cu II | 1    | 16.70 | - | 18.69 | 4p 3D | - | 8s 3D | 2 | - | 2 |  |
| 620.8457 Cu II | 1105 | 15.25 | - | 17.25 | 5p 1F | - | 5d 1F | 3 | - | 3 |  |
| 620.8987 Cu II | 3    | 14.62 | - | 16.61 | 4d 1G | - | 4p 3D | 4 | - | 3 |  |
| 621.6939 Cu II | 4426 | 14.96 | - | 16.96 | 5p 3F | - | 5d 3G | 3 | - | 4 |  |
| 621.7735 Cu II | 0    | 14.60 | - | 16.59 | 4d 3G | - | 4p 3P | 3 | - | 2 |  |
| 621.9844 Cu II | 3492 | 15.22 | - | 17.21 | 5p 3F | - | 5d 3G | 2 | - | 3 |  |
| 622.1291 Cu II | 47   | 14.96 | - | 16.96 | 5p 3F | - | 5d 3P | 3 | - | 2 |  |
| 622.2069 Cu II | 1    | 16.70 | - | 18.69 | 4p 3D | - | 8s 3D | 2 | - | 3 |  |
| 623.1395 Cu II | 25   | 14.99 | - | 16.98 | 4p 1D | - | 5d 3D | 2 | - | 3 |  |
| 623.2090 Cu II | 0    | 16.17 | - | 18.15 | 4p 3P | - | 6d 3P | 2 | - | 1 |  |
| 623.3905 Cu II | 2    | 15.97 | - | 17.95 | 4p 3F | - | 7s 3D | 4 | - | 3 |  |
| 623.6347 Cu II | 90   | 15.23 | - | 17.22 | 5p 1P | - | 5d 3D | 1 | - | 1 |  |
| 623.6886 Cu II | 1    | 16.17 | - | 18.15 | 4p 3P | - | 6d 3P | 2 | - | 2 |  |
| 623.6988 Cu II | 0    | 15.98 | - | 17.96 | 4p 3D | - | 7s 3D | 2 | - | 2 |  |
| 624.8255 Cu II | 3    | 16.71 | - | 18.69 | 4p 3H | - | 8s 3D | 4 | - | 3 |  |
| 624.9897 Cu II | 0    | 16.23 | - | 18.22 | 4p 5D | - | 7s 1D | 1 | - | 2 |  |
| 625.0424 Cu II | 17   | 15.01 | - | 17.00 | 4p 1F | - | 5d 3D | 3 | - | 2 |  |
| 625.7837 Cu II | 292  | 14.98 | - | 16.96 | 5p 3F | - | 5d 3G | 4 | - | 4 |  |
| 626.1848 Cu II | 1143 | 15.01 | - | 16.99 | 4p 1F | - | 5d 3F | 3 | - | 4 |  |
| 626.2200 Cu II | 78   | 15.25 | - | 17.23 | 5p 1F | - | 5d 1D | 3 | - | 2 |  |
| 626.3589 Cu II | 1    | 15.98 | - | 17.95 | 4p 3D | - | 7s 3D | 2 | - | 3 |  |
| 626.5651 Cu II | 139  | 15.01 | - | 16.99 | 4p 1F | - | 5d 3F | 3 | - | 3 |  |
| 627.0806 Cu II | 0    | 16.24 | - | 18.21 | 4p 5D | - | 7s 3D | 2 | - | 1 |  |
| 627.3349 Cu II | 6383 | 14.98 | - | 16.95 | 5p 3F | - | 5d 3G | 4 | - | 5 |  |
| 627.6673 Cu II | 29   | 14.59 | - | 16.56 | 4p 3F | - | 6s 3D | 4 | - | 3 |  |
| 628.8696 Cu II | 290  | 14.99 | - | 16.96 | 4p 1D | - | 5d 3P | 2 | - | 1 |  |
| 629.6245 Cu II | 14   | 14.99 | - | 16.96 | 4p 1D | - | 5d 3P | 2 | - | 2 |  |
| 629.7407 Cu II | 0    | 14.20 | - | 16.17 | 4d 3S | - | 4p 3P | 1 | - | 2 |  |
| 630.1009 Cu II | 5035 | 15.25 | - | 17.22 | 5p 1F | - | 5d 1G | 3 | - | 4 |  |
| 630.5972 Cu II | 906  | 14.99 | - | 16.96 | 5p 3P | - | 5d 3P | 1 | - | 1 |  |
| 630.8561 Cu II | 2    | 15.22 | - | 17.18 | 5p 3F | - | 5d 1P | 2 | - | 1 |  |

|               |      |       |   |       |       |   |       |   |   |   |  |
|---------------|------|-------|---|-------|-------|---|-------|---|---|---|--|
| 631.1309Cu II | 929  | 15.01 | - | 16.98 | 4p 1F | - | 5d 3D | 3 | - | 3 |  |
| 631.2492Cu II | 1443 | 15.29 | - | 17.25 | 5p 3D | - | 5d 3F | 1 | - | 2 |  |
| 631.3563Cu II | 27   | 14.99 | - | 16.96 | 5p 3P | - | 5d 3P | 1 | - | 2 |  |
| 631.5676Cu II | 1    | 16.17 | - | 18.13 | 4p 3P | - | 6d 3S | 2 | - | 1 |  |
| 631.6193Cu II | 1    | 14.70 | - | 16.66 | 4d 3F | - | 4p 3P | 2 | - | 1 |  |
| 632.6466Cu II | 212  | 15.25 | - | 17.21 | 5p 1F | - | 5d 3G | 3 | - | 3 |  |
| 634.0992Cu II | 1    | 16.01 | - | 17.96 | 4p 3D | - | 7s 3D | 3 | - | 2 |  |
| 635.7422Cu II | 927  | 15.23 | - | 17.18 | 5p 1P | - | 5d 1P | 1 | - | 1 |  |
| 637.3268Cu II | 317  | 15.01 | - | 16.96 | 4p 1F | - | 5d 3G | 3 | - | 4 |  |
| 637.5726Cu II | 0    | 16.27 | - | 18.21 | 4p 5D | - | 7s 3D | 0 | - | 1 |  |
| 637.7246Cu II | 367  | 15.29 | - | 17.23 | 5p 3D | - | 5d 1D | 1 | - | 2 |  |
| 637.7840Cu II | 388  | 15.01 | - | 16.96 | 4p 1F | - | 5d 3P | 3 | - | 2 |  |
| 638.0762Cu II | 15   | 14.89 | - | 16.83 | 5p 3P | - | 6s 1D | 2 | - | 2 |  |
| 638.2847Cu II | 0    | 14.65 | - | 16.59 | 4d 1D | - | 4p 3P | 2 | - | 2 |  |
| 638.5264Cu II | 2    | 14.64 | - | 16.58 | 4p 3D | - | 6s 3D | 1 | - | 2 |  |
| 638.8065Cu II | 1    | 14.34 | - | 16.28 | 4d 3G | - | 4p 5D | 4 | - | 3 |  |
| 638.9116Cu II | 1    | 16.75 | - | 18.69 | 4p 3D | - | 8s 3D | 1 | - | 2 |  |
| 639.4297Cu II | 0    | 16.23 | - | 18.17 | 4p 5D | - | 6d 3D | 1 | - | 2 |  |
| 639.8682Cu II | 1    | 16.28 | - | 18.22 | 4p 5D | - | 7s 1D | 3 | - | 2 |  |
| 640.3384Cu II | 479  | 15.18 | - | 17.11 | 4d 1S | - | 4f 3D | 0 | - | 1 |  |
| 641.1151Cu II | 858  | 15.29 | - | 17.22 | 5p 3D | - | 5d 3D | 1 | - | 1 |  |
| 641.4563Cu II | 533  | 15.32 | - | 17.25 | 5p 1D | - | 5d 3F | 2 | - | 2 |  |
| 641.4618Cu II | 23   | 14.65 | - | 16.58 | 4p 3F | - | 6s 3D | 3 | - | 2 |  |
| 641.9952Cu II | 2    | 14.89 | - | 16.82 | 5p 3P | - | 6s 3D | 2 | - | 1 |  |
| 642.3884Cu II | 2450 | 15.32 | - | 17.25 | 5p 1D | - | 5d 1F | 2 | - | 3 |  |
| 642.8079Cu II | 0    | 16.24 | - | 18.16 | 4p 5D | - | 6d 3D | 2 | - | 3 |  |
| 642.9595Cu II | 7    | 15.07 | - | 17.00 | 5p 3D | - | 5d 3D | 3 | - | 2 |  |
| 643.2409Cu II | 26   | 13.39 | - | 15.32 | 5s 3D | - | 5p 1D | 3 | - | 2 |  |
| 644.1684Cu II | 2224 | 15.07 | - | 16.99 | 5p 3D | - | 5d 3F | 3 | - | 4 |  |
| 644.2965Cu II | 0    | -     | - | -     | -     | - | -     | - | - | - |  |
| 644.5708Cu II | 23   | 15.07 | - | 16.99 | 5p 3D | - | 5d 3F | 3 | - | 3 |  |
| 644.8559Cu II | 0    | -     | - | -     | -     | - | -     | - | - | - |  |
| 644.9616Cu II | 0    | 14.69 | - | 16.61 | 4d 1F | - | 4p 3D | 3 | - | 3 |  |
| 645.5054Cu II | 0    | 16.23 | - | 18.15 | 4p 5D | - | 6d 3P | 1 | - | 1 |  |
| 645.6141Cu II | 1    | 13.65 | - | 15.57 | 5s 3D | - | 4p 5P | 1 | - | 1 |  |
| 646.1525Cu II | 0    | 16.24 | - | 18.15 | 4p 5D | - | 6d 3P | 2 | - | 2 |  |
| 646.6246Cu II | 1    | 14.99 | - | 16.90 | 4p 1D | - | 5d 3S | 2 | - | 1 |  |
| 647.0168Cu II | 18   | 14.65 | - | 16.56 | 4p 3F | - | 6s 3D | 3 | - | 3 |  |
| 648.1437Cu II | 867  | 15.32 | - | 17.23 | 5p 1D | - | 5d 1D | 2 | - | 2 |  |
| 648.4421Cu II | 259  | 14.99 | - | 16.90 | 5p 3P | - | 5d 3S | 1 | - | 1 |  |
| 649.4038Cu II | 1378 | 15.07 | - | 16.98 | 5p 3D | - | 5d 3D | 3 | - | 3 |  |
| 651.6207Cu II | 0    | 14.69 | - | 16.59 | 4d 1F | - | 4p 3P | 3 | - | 2 |  |

|               |     |       |   |       |       |   |       |   |   |   |
|---------------|-----|-------|---|-------|-------|---|-------|---|---|---|
| 651.6463Cu II | 119 | 15.32 | - | 17.22 | 5p 1D | - | 5d 3D | 2 | - | 1 |
| 651.7317Cu II | 0   | -     |   | -     |       | - |       |   |   |   |
| 653.0083Cu II | 0   | -     |   | -     |       | - |       |   |   |   |
| 653.6697Cu II | 0   | 14.70 | - | 16.59 | 4d 3F | - | 4p 3P | 2 | - | 2 |
| 653.9179Cu II | 2   | 15.29 | - | 17.18 | 5p 3D | - | 5d 1P | 1 | - | 1 |
| 654.6131Cu II | 0   | 16.24 | - | 18.13 | 4p 5D | - | 6d 3S | 2 | - | 1 |
| 655.0122Cu II | 0   | 16.28 | - | 18.17 | 4p 5D | - | 6d 3D | 3 | - | 2 |
| 655.0304Cu II | 4   | 15.32 | - | 17.21 | 5p 1D | - | 5d 3G | 2 | - | 3 |
| 655.1286Cu II | 0   | -     |   | -     |       | - |       |   |   |   |
| 655.6207Cu II | 0   | 14.20 | - | 16.09 | 4d 3S | - | 4p 3P | 1 | - | 1 |
| 655.6731Cu II | 0   | 16.28 | - | 18.17 | 4p 5D | - | 6d 3F | 3 | - | 4 |
| 655.8164Cu II | 1   | 16.28 | - | 18.17 | 4p 5D | - | 6d 3F | 3 | - | 3 |
| 655.9655Cu II | 189 | 15.07 | - | 16.96 | 5p 3D | - | 5d 3G | 3 | - | 4 |
| 656.4501Cu II | 463 | 15.07 | - | 16.96 | 5p 3D | - | 5d 3P | 3 | - | 2 |
| 656.7963Cu II | 1   | 13.43 | - | 15.32 | 5s 3D | - | 5p 1D | 2 | - | 2 |
| 657.5761Cu II | 0   | 13.68 | - | 15.57 | 5s 1D | - | 4p 5P | 2 | - | 1 |
| 657.7080Cu II | 0   | -     |   | -     |       | - |       |   |   |   |
| 658.4200Cu II | 0   | 16.28 | - | 18.16 | 4p 5D | - | 6d 3D | 3 | - | 3 |
| 659.2901Cu II | 2   | 13.65 | - | 15.53 | 5s 3D | - | 4p 5P | 1 | - | 2 |
| 661.0514Cu II | 1   | 16.09 | - | 17.96 | 4p 3P | - | 7s 3D | 1 | - | 2 |
| 661.5961Cu II | 1   | 16.28 | - | 18.15 | 4p 5D | - | 6d 3G | 3 | - | 4 |
| 661.9294Cu II | 0   | 16.28 | - | 18.15 | 4p 5D | - | 6d 3P | 3 | - | 2 |
| 662.4292Cu II | 611 | 15.12 | - | 17.00 | 5p 3D | - | 5d 3D | 2 | - | 2 |
| 663.1474Cu II | 1   | 14.96 | - | 16.83 | 5p 3F | - | 6s 1D | 3 | - | 2 |
| 663.5167Cu II | 1   | 16.90 | - | 18.77 | 5d 3S | - | 6f 3D | 1 | - | 2 |
| 664.1396Cu II | 964 | 15.12 | - | 16.99 | 5p 3D | - | 5d 3F | 2 | - | 3 |
| 664.3113Cu II | 3   | 16.83 | - | 18.69 | 4p 3F | - | 8s 3D | 3 | - | 2 |
| 664.7799Cu II | 199 | 16.90 | - | 18.77 | 5d 3S | - | 6f 3P | 1 | - | 2 |
| 664.8774Cu II | 228 | 15.32 | - | 17.18 | 5p 1D | - | 5d 1P | 2 | - | 1 |
| 665.5945Cu II | 0   | 15.57 | - | 17.43 | 4p 5P | - | 5d 1S | 1 | - | 0 |
| 666.0620Cu II | 22  | 16.83 | - | 18.69 | 4p 3F | - | 8s 3D | 3 | - | 3 |
| 666.0962Cu II | 0   | -     |   | -     |       | - |       |   |   |   |
| 666.3947Cu II | 19  | 13.39 | - | 15.25 | 5s 3D | - | 5p 1F | 3 | - | 3 |
| 667.0825Cu II | 0   | 14.42 | - | 16.28 | 4d 3F | - | 4p 5D | 3 | - | 3 |
| 667.8534Cu II | 9   | 13.43 | - | 15.29 | 5s 3D | - | 5p 3D | 2 | - | 1 |
| 669.1035Cu II | 0   | 14.43 | - | 16.28 | 4d 3F | - | 4p 5D | 4 | - | 3 |
| 669.2714Cu II | 43  | 15.12 | - | 16.98 | 5p 3D | - | 5d 3D | 2 | - | 3 |
| 669.8481Cu II | 0   | 14.43 | - | 16.28 | 4d 3D | - | 4p 5D | 2 | - | 3 |
| 671.6706Cu II | 29  | 14.99 | - | 16.83 | 4p 1D | - | 6s 1D | 2 | - | 2 |
| 671.7692Cu II | 8   | 13.68 | - | 15.53 | 5s 1D | - | 4p 5P | 2 | - | 2 |
| 672.5835Cu II | 3   | 13.68 | - | 15.53 | 5s 1D | - | 4p 5P | 2 | - | 3 |
| 673.5433Cu II | 1   | 16.66 | - | 18.50 | 4p 3P | - | 6d 1S | 1 | - | 0 |

|                |      |       |   |       |       |   |       |   |   |   |  |
|----------------|------|-------|---|-------|-------|---|-------|---|---|---|--|
| 673.6417 Cu II | 60   | 14.99 | - | 16.83 | 5p 3P | - | 6s 1D | 1 | - | 2 |  |
| 674.1142 Cu II | 0    | 16.86 | - | 18.69 | 4p 5S | - | 8s 3D | 2 | - | 2 |  |
| 674.7342 Cu II | 0    | 16.59 | - | 18.43 | 4p 3P | - | 6d 3F | 2 | - | 2 |  |
| 675.2532 Cu II | 1    | 16.59 | - | 18.43 | 4p 3P | - | 6d 1F | 2 | - | 3 |  |
| 675.6347 Cu II | 1    | 15.18 | - | 17.01 | 4d 1S | - | 4p 1P | 0 | - | 1 |  |
| 675.8857 Cu II | 151  | 15.12 | - | 16.96 | 5p 3D | - | 5d 3P | 2 | - | 1 |  |
| 675.9170 Cu II | 1    | 16.86 | - | 18.69 | 4p 5S | - | 8s 3D | 2 | - | 3 |  |
| 676.0145 Cu II | 6    | 14.99 | - | 16.82 | 4p 1D | - | 6s 3D | 2 | - | 1 |  |
| 676.7579 Cu II | 0    | 15.12 | - | 16.96 | 5p 3D | - | 5d 3P | 2 | - | 2 |  |
| 677.0362 Cu II | 0    | -     | - | -     | -     | - | -     | - | - | - |  |
| 677.8896 Cu II | 1    | 14.34 | - | 16.17 | 4d 3P | - | 4p 3P | 2 | - | 2 |  |
| 677.9440 Cu II | 4    | 15.23 | - | 17.06 | 5p 1P | - | 5d 3P | 1 | - | 0 |  |
| 678.0113 Cu II | 35   | 14.99 | - | 16.82 | 5p 3P | - | 6s 3D | 1 | - | 1 |  |
| 678.5136 Cu II | 1    | 16.59 | - | 18.42 | 4p 3P | - | 6d 1D | 2 | - | 2 |  |
| 678.6485 Cu II | 6    | 13.39 | - | 15.22 | 5s 3D | - | 5p 3F | 3 | - | 2 |  |
| 679.1030 Cu II | 0    | 14.34 | - | 16.17 | 4d 3P | - | 4p 3P | 1 | - | 2 |  |
| 680.6216 Cu II | 15   | 14.76 | - | 16.58 | 4p 3F | - | 6s 3D | 2 | - | 2 |  |
| 680.9546 Cu II | 13   | 13.43 | - | 15.25 | 5s 3D | - | 5p 1F | 2 | - | 3 |  |
| 680.9647 Cu II | 70   | 15.01 | - | 16.83 | 4p 1F | - | 6s 1D | 3 | - | 2 |  |
| 681.7116 Cu II | 50   | 16.96 | - | 18.77 | 5d 3P | - | 6f 3F | 2 | - | 3 |  |
| 682.0258 Cu II | 0    | 16.61 | - | 18.43 | 4p 3D | - | 6d 3F | 3 | - | 2 |  |
| 682.1336 Cu II | 0    | 16.59 | - | 18.41 | 4p 3P | - | 6d 3G | 2 | - | 3 |  |
| 682.2350 Cu II | 20   | 16.96 | - | 18.77 | 5d 3G | - | 6f 3F | 4 | - | 3 |  |
| 682.3202 Cu II | 1679 | 16.95 | - | 18.77 | 5d 3G | - | 6f 3H | 5 | - | 6 |  |
| 682.4133 Cu II | 106  | 16.96 | - | 18.77 | 5d 3P | - | 6f 3D | 2 | - | 2 |  |
| 682.4750 Cu II | 344  | 16.96 | - | 18.77 | 5d 3P | - | 6f 3F | 2 | - | 3 |  |
| 682.5560 Cu II | 1    | 16.61 | - | 18.43 | 4p 3D | - | 6d 1F | 3 | - | 3 |  |
| 682.5697 Cu II | 26   | 16.95 | - | 18.77 | 5d 3G | - | 6f 3H | 5 | - | 5 |  |
| 682.9996 Cu II | 1    | 16.96 | - | 18.77 | 5d 3G | - | 6f 3F | 4 | - | 3 |  |
| 683.0532 Cu II | 1125 | 17.21 | - | 19.03 | 5d 3G | - | 6f 3H | 3 | - | 4 |  |
| 683.3024 Cu II | 278  | 16.96 | - | 18.77 | 5d 3P | - | 6f 3D | 1 | - | 2 |  |
| 683.7494 Cu II | 277  | 16.96 | - | 18.77 | 5d 3P | - | 6f 3P | 2 | - | 2 |  |
| 684.4157 Cu II | 1368 | 16.96 | - | 18.77 | 5d 3G | - | 6f 3H | 4 | - | 5 |  |
| 684.6067 Cu II | 6    | 14.75 | - | 16.56 | 4p 1G | - | 6s 3D | 4 | - | 3 |  |
| 684.6421 Cu II | 42   | 16.96 | - | 18.77 | 5d 3P | - | 6f 3P | 1 | - | 2 |  |
| 685.4297 Cu II | 2    | 16.82 | - | 18.63 | 6s 3D | - | 4p 3F | 1 | - | 2 |  |
| 685.8876 Cu II | 0    | 16.61 | - | 18.42 | 4p 3D | - | 6d 1D | 3 | - | 2 |  |
| 686.0453 Cu II | 33   | 17.22 | - | 19.03 | 5d 1G | - | 6f 3H | 4 | - | 4 |  |
| 686.3065 Cu II | 1406 | 17.22 | - | 19.03 | 5d 1G | - | 6f 1H | 4 | - | 5 |  |
| 686.8791 Cu II | 10   | 14.76 | - | 16.56 | 4p 3F | - | 6s 3D | 2 | - | 3 |  |
| 687.1357 Cu II | 1    | 15.15 | - | 16.96 | 5p 3P | - | 5d 3P | 0 | - | 1 |  |

|               |     |       |   |       |       |   |       |   |     |
|---------------|-----|-------|---|-------|-------|---|-------|---|-----|
| 687.2231Cu II | 0   | -     | - | -     | -     | - | -     | - | -   |
| 687.7756Cu II | 1   | 16.59 | - | 18.39 | 4p 3P | - | 6d 1P | 2 | - 1 |
| 687.9404Cu II | 93  | 13.43 | - | 15.23 | 5s 3D | - | 5p 1P | 2 | - 1 |
| 687.9837Cu II | 9   | 16.61 | - | 18.41 | 4p 3D | - | 6d 1G | 3 | - 4 |
| 689.4806Cu II | 44  | 16.98 | - | 18.77 | 5d 3D | - | 6f 3F | 3 | - 3 |
| 689.5868Cu II | 1   | 16.61 | - | 18.41 | 4p 3D | - | 6d 3G | 3 | - 3 |
| 689.6271Cu II | 0   | 16.17 | - | 17.96 | 4p 3P | - | 7s 3D | 2 | - 2 |
| 689.9540Cu II | 7   | 16.83 | - | 18.63 | 6s 1D | - | 4p 3F | 2 | - 2 |
| 690.1984Cu II | 24  | 16.98 | - | 18.77 | 5d 3D | - | 6f 3D | 3 | - 2 |
| 690.2616Cu II | 387 | 16.98 | - | 18.77 | 5d 3D | - | 6f 3F | 3 | - 3 |
| 691.5653Cu II | 71  | 16.98 | - | 18.77 | 5d 3D | - | 6f 3P | 3 | - 2 |
| 692.8808Cu II | 1   | 16.17 | - | 17.95 | 4p 3P | - | 7s 3D | 2 | - 3 |
| 693.7553Cu II | 108 | 13.43 | - | 15.22 | 5s 3D | - | 5p 3F | 2 | - 2 |
| 695.0135Cu II | 273 | 16.99 | - | 18.77 | 5d 3F | - | 6f 3F | 3 | - 3 |
| 695.2871Cu II | 0   | -     | - | -     | -     | - | -     | - | -   |
| 695.4819Cu II | 8   | 16.99 | - | 18.77 | 5d 3F | - | 6f 3F | 4 | - 3 |
| 695.7429Cu II | 32  | 16.99 | - | 18.77 | 5d 3F | - | 6f 3D | 3 | - 2 |
| 695.8070Cu II | 9   | 16.99 | - | 18.77 | 5d 3F | - | 6f 3F | 3 | - 3 |
| 695.9973Cu II | 0   | 14.45 | - | 16.23 | 4d 3P | - | 4p 5D | 0 | - 1 |
| 696.2765Cu II | 48  | 16.99 | - | 18.77 | 5d 3F | - | 6f 3F | 4 | - 3 |
| 696.4274Cu II | 6   | 15.12 | - | 16.90 | 5p 3D | - | 5d 3S | 2 | - 1 |
| 696.8966Cu II | 491 | 17.00 | - | 18.77 | 5d 3D | - | 6f 3F | 2 | - 3 |
| 697.0214Cu II | 1   | 14.20 | - | 15.98 | 4d 3S | - | 4p 3D | 1 | - 2 |
| 697.1318Cu II | 1   | 16.99 | - | 18.77 | 5d 3F | - | 6f 3P | 3 | - 2 |
| 697.3642Cu II | 1   | 17.25 | - | 19.03 | 5d 1F | - | 6f 3H | 3 | - 4 |
| 697.6299Cu II | 199 | 17.00 | - | 18.77 | 5d 3D | - | 6f 3D | 2 | - 2 |
| 697.6944Cu II | 107 | 17.00 | - | 18.77 | 5d 3D | - | 6f 3F | 2 | - 3 |
| 697.7572Cu II | 21  | 16.99 | - | 18.77 | 5d 3F | - | 6f 3H | 4 | - 5 |
| 697.7563Cu II | 108 | 15.22 | - | 17.00 | 5p 3F | - | 5d 3D | 2 | - 2 |
| 698.6521Cu II | 35  | 15.29 | - | 17.06 | 5p 3D | - | 5d 3P | 1 | - 0 |
| 698.8061Cu II | 0   | 14.39 | - | 16.17 | 4d 3D | - | 4p 3P | 3 | - 2 |
| 699.0264Cu II | 56  | 17.00 | - | 18.77 | 5d 3D | - | 6f 3P | 2 | - 2 |
| 699.0547Cu II | 5   | 16.92 | - | 18.69 | 4p 3D | - | 8s 3D | 3 | - 3 |
| 699.6543Cu II | 68  | 15.22 | - | 16.99 | 5p 3F | - | 5d 3F | 2 | - 3 |
| 699.9578Cu II | 3   | 16.66 | - | 18.43 | 4p 3P | - | 6d 3F | 1 | - 2 |
| 702.2860Cu II | 9   | 15.07 | - | 16.83 | 5p 3D | - | 6s 1D | 3 | - 2 |
| 703.7385Cu II | 70  | 15.23 | - | 17.00 | 5p 1P | - | 5d 3D | 1 | - 2 |
| 704.0259Cu II | 0   | 16.66 | - | 18.42 | 4p 3P | - | 6d 1D | 1 | - 2 |
| 705.3523Cu II | 10  | 15.22 | - | 16.98 | 5p 3F | - | 5d 3D | 2 | - 3 |
| 705.9342Cu II | 3   | 16.66 | - | 18.41 | 4p 3P | - | 6d 3D | 1 | - 1 |
| 708.3776Cu II | 7   | 15.15 | - | 16.90 | 5p 3P | - | 5d 3S | 0 | - 1 |
| 709.2964Cu II | 0   | 14.34 | - | 16.09 | 4d 3P | - | 4p 3P | 1 | - 1 |

|               |     |       |   |       |       |   |       |   |   |   |
|---------------|-----|-------|---|-------|-------|---|-------|---|---|---|
| 711.0170Cu II | 0   | 14.42 | - | 16.17 | 4d 3F | - | 4p 3P | 3 | - | 2 |
| 711.1472Cu II | 0   | 14.20 | - | 15.94 | 4d 3S | - | 4p 3D | 1 | - | 2 |
| 711.2023Cu II | 1   | 15.25 | - | 17.00 | 5p 1F | - | 5d 3D | 3 | - | 2 |
| 712.6817Cu II | 7   | 15.25 | - | 16.99 | 5p 1F | - | 5d 3F | 3 | - | 4 |
| 712.7030Cu II | 28  | 15.22 | - | 16.96 | 5p 3F | - | 5d 3P | 2 | - | 1 |
| 713.1743Cu II | 9   | 15.25 | - | 16.99 | 5p 1F | - | 5d 3F | 3 | - | 3 |
| 713.6728Cu II | 1   | 15.22 | - | 16.96 | 5p 3F | - | 5d 3P | 2 | - | 2 |
| 714.0026Cu II | 1   | 16.66 | - | 18.39 | 4p 3P | - | 6d 1P | 1 | - | 1 |
| 714.1597Cu II | 0   | 14.43 | - | 16.17 | 4d 3D | - | 4p 3P | 2 | - | 2 |
| 714.9917Cu II | 20  | 16.96 | - | 18.69 | 4p 3F | - | 8s 3D | 2 | - | 2 |
| 715.7757Cu II | 25  | 13.39 | - | 15.12 | 5s 3D | - | 5p 3D | 3 | - | 2 |
| 715.7780Cu II | 4   | 16.70 | - | 18.43 | 4p 3D | - | 6d 3F | 2 | - | 2 |
| 716.3620Cu II | 19  | 16.70 | - | 18.43 | 4p 3D | - | 6d 1F | 2 | - | 3 |
| 717.0202Cu II | 8   | 16.96 | - | 18.69 | 4p 3F | - | 8s 3D | 2 | - | 3 |
| 717.0337Cu II | 0   | 16.23 | - | 17.96 | 4p 5D | - | 7s 3D | 1 | - | 2 |
| 718.5547Cu II | 15  | 16.90 | - | 18.63 | 5d 3S | - | 4p 3F | 1 | - | 2 |
| 718.6088Cu II | 0   | 15.53 | - | 17.25 | 4p 5P | - | 5d 3F | 3 | - | 2 |
| 718.9454Cu II | 123 | 15.23 | - | 16.96 | 5p 1P | - | 5d 3P | 1 | - | 1 |
| 719.0955Cu II | 11  | 15.25 | - | 16.98 | 5p 1F | - | 5d 3D | 3 | - | 3 |
| 719.4896Cu II | 0   | -     | - | -     | -     | - | -     | - | - | - |
| 719.5407Cu II | 3   | 15.53 | - | 17.25 | 4p 5P | - | 5d 3F | 2 | - | 2 |
| 719.7789Cu II | 1   | 15.53 | - | 17.25 | 4p 5P | - | 5d 1F | 3 | - | 3 |
| 719.9323Cu II | 1   | 15.23 | - | 16.96 | 5p 1P | - | 5d 3P | 1 | - | 2 |
| 720.0327Cu II | 7   | 16.70 | - | 18.42 | 4p 3D | - | 6d 1D | 2 | - | 2 |
| 720.7138Cu II | 12  | 15.53 | - | 17.25 | 4p 5P | - | 5d 1F | 2 | - | 3 |
| 720.7166Cu II | 0   | 16.24 | - | 17.95 | 4p 5D | - | 7s 3D | 2 | - | 3 |
| 722.0288Cu II | 1   | 16.70 | - | 18.41 | 4p 3D | - | 6d 3D | 2 | - | 1 |
| 724.1105Cu II | 0   | 16.70 | - | 18.41 | 4p 3D | - | 6d 3G | 2 | - | 3 |
| 725.5786Cu II | 167 | 15.12 | - | 16.83 | 5p 3D | - | 6s 1D | 2 | - | 2 |
| 725.8747Cu II | 0   | 16.71 | - | 18.41 | 4p 3H | - | 6d 1G | 4 | - | 4 |
| 726.0784Cu II | 1   | 15.29 | - | 17.00 | 5p 3D | - | 5d 3D | 1 | - | 2 |
| 727.0123Cu II | 0   | 15.53 | - | 17.23 | 4p 5P | - | 5d 1D | 3 | - | 2 |
| 727.1499Cu II | 19  | 15.25 | - | 16.96 | 5p 1F | - | 5d 3G | 3 | - | 4 |
| 727.7455Cu II | 5   | 15.25 | - | 16.96 | 5p 1F | - | 5d 3P | 3 | - | 2 |
| 727.9661Cu II | 5   | 15.53 | - | 17.23 | 4p 5P | - | 5d 1D | 2 | - | 2 |
| 730.4715Cu II | 2   | 16.70 | - | 18.39 | 4p 3D | - | 6d 1P | 2 | - | 1 |
| 730.6504Cu II | 84  | 15.12 | - | 16.82 | 5p 3D | - | 6s 3D | 2 | - | 1 |
| 731.6104Cu II | 2   | 17.00 | - | 18.69 | 4p 3G | - | 8s 3D | 3 | - | 3 |
| 732.2484Cu II | 5   | 15.53 | - | 17.22 | 4p 5P | - | 5d 1G | 3 | - | 4 |
| 732.3873Cu II | 1   | 15.53 | - | 17.22 | 4p 5P | - | 5d 3D | 2 | - | 1 |
| 732.6008Cu II | 917 | 13.43 | - | 15.12 | 5s 3D | - | 5p 3D | 2 | - | 2 |
| 733.1694Cu II | 64  | 14.89 | - | 16.58 | 5p 3P | - | 6s 3D | 2 | - | 2 |

|               |      |       |   |       |       |   |       |   |   |   |  |
|---------------|------|-------|---|-------|-------|---|-------|---|---|---|--|
| 735.5813Cu II | 1    | 15.22 | - | 16.90 | 5p 3F | - | 5d 3S | 2 | - | 1 |  |
| 735.6881Cu II | 1    | 15.53 | - | 17.21 | 4p 5P | - | 5d 3G | 3 | - | 3 |  |
| 736.5693Cu II | 1    | 15.57 | - | 17.25 | 4p 5P | - | 5d 3F | 1 | - | 2 |  |
| 736.6648Cu II | 0    | 15.53 | - | 17.21 | 4p 5P | - | 5d 3G | 2 | - | 3 |  |
| 736.6862Cu II | 1    | 16.28 | - | 17.96 | 4p 5D | - | 7s 3D | 3 | - | 2 |  |
| 736.7338Cu II | 3    | 17.01 | - | 18.69 | 4p 1P | - | 8s 3D | 1 | - | 2 |  |
| 738.2277Cu II | 250  | 15.18 | - | 16.86 | 4d 1S | - | 4f 1P | 0 | - | 1 |  |
| 739.6151Cu II | 10   | 15.32 | - | 17.00 | 5p 1D | - | 5d 3D | 2 | - | 2 |  |
| 739.9875Cu II | 1589 | 13.39 | - | 15.07 | 5s 3D | - | 5p 3D | 3 | - | 3 |  |
| 740.1354Cu II | 4    | 16.75 | - | 18.43 | 4p 3D | - | 6d 3F | 1 | - | 2 |  |
| 740.4002Cu II | 1    | 16.28 | - | 17.95 | 4p 5D | - | 7s 3D | 3 | - | 3 |  |
| 740.4354Cu II | 1325 | 14.89 | - | 16.56 | 5p 3P | - | 6s 3D | 2 | - | 3 |  |
| 740.7686Cu II | 16   | 16.96 | - | 18.63 | 5d 3P | - | 4p 3F | 2 | - | 2 |  |
| 741.7379Cu II | 0    | 14.34 | - | 16.01 | 4d 3P | - | 4p 3D | 2 | - | 3 |  |
| 741.7481Cu II | 40   | 15.32 | - | 16.99 | 5p 1D | - | 5d 3F | 2 | - | 3 |  |
| 741.8164Cu II | 0    | 16.96 | - | 18.63 | 5d 3P | - | 4p 3F | 1 | - | 2 |  |
| 742.0567Cu II | 209  | 13.65 | - | 15.32 | 5s 3D | - | 5p 1D | 1 | - | 2 |  |
| 742.2328Cu II | 4    | 15.23 | - | 16.90 | 5p 1P | - | 5d 3S | 1 | - | 1 |  |
| 742.2771Cu II | 1    | 15.29 | - | 16.96 | 5p 3D | - | 5d 3P | 1 | - | 1 |  |
| 743.0475Cu II | 1    | 14.34 | - | 16.01 | 4d 3G | - | 4p 3D | 4 | - | 3 |  |
| 743.3292Cu II | 1    | 15.29 | - | 16.96 | 5p 3D | - | 5d 3P | 1 | - | 2 |  |
| 743.4156Cu II | 63   | 15.18 | - | 16.85 | 4d 1S | - | 4f 3P | 0 | - | 1 |  |
| 743.8151Cu II | 283  | 15.15 | - | 16.82 | 5p 3P | - | 6s 3D | 0 | - | 1 |  |
| 744.4339Cu II | 1    | 14.62 | - | 16.28 | 4d 1G | - | 4p 5D | 4 | - | 3 |  |
| 744.6855Cu II | 14   | 16.75 | - | 18.42 | 4p 3D | - | 6d 1D | 1 | - | 2 |  |
| 745.4006Cu II | 1    | 15.57 | - | 17.23 | 4p 5P | - | 5d 1D | 1 | - | 2 |  |
| 746.8209Cu II | 1    | 16.75 | - | 18.41 | 4p 3D | - | 6d 3D | 1 | - | 1 |  |
| 747.6276Cu II | 0    | 14.43 | - | 16.09 | 4d 3D | - | 4p 3P | 2 | - | 1 |  |
| 748.1555Cu II | 11   | 15.32 | - | 16.98 | 5p 1D | - | 5d 3D | 2 | - | 3 |  |
| 749.1425Cu II | 2    | 15.53 | - | 17.18 | 4p 5P | - | 5d 1P | 2 | - | 1 |  |
| 749.4792Cu II | 0    | 16.85 | - | 18.50 | 4f 3P | - | 6d 1S | 1 | - | 0 |  |
| 749.9511Cu II | 15   | 16.98 | - | 18.63 | 5d 3D | - | 4p 3F | 3 | - | 2 |  |
| 750.0368Cu II | 1    | 15.57 | - | 17.22 | 4p 5P | - | 5d 3D | 1 | - | 1 |  |
| 754.8271Cu II | 1    | 16.86 | - | 18.50 | 4f 1P | - | 6d 1S | 1 | - | 0 |  |
| 755.8569Cu II | 6    | 16.75 | - | 18.39 | 4p 3D | - | 6d 1P | 1 | - | 1 |  |
| 756.2015Cu II | 1028 | 13.65 | - | 15.29 | 5s 3D | - | 5p 3D | 1 | - | 1 |  |
| 756.4305Cu II | 2    | 15.32 | - | 16.96 | 5p 1D | - | 5d 3P | 2 | - | 1 |  |
| 756.4939Cu II | 1    | 14.34 | - | 15.98 | 4d 3P | - | 4p 3D | 2 | - | 2 |  |
| 756.5016Cu II | 11   | 16.99 | - | 18.63 | 5d 3F | - | 4p 3F | 3 | - | 2 |  |
| 756.8484Cu II | 4    | 14.33 | - | 15.97 | 4d 3G | - | 4p 3F | 5 | - | 4 |  |
| 757.5232Cu II | 13   | 15.32 | - | 16.96 | 5p 1D | - | 5d 3P | 2 | - | 2 |  |

|               |      |       |   |       |       |   |       |   |   |   |  |
|---------------|------|-------|---|-------|-------|---|-------|---|---|---|--|
| 757.5789Cu II | 1    | 14.60 | - | 16.24 | 4d 3G | - | 4p 5D | 3 | - | 2 |  |
| 757.9033Cu II | 1888 | 13.68 | - | 15.32 | 5s 1D | - | 5p 1D | 2 | - | 2 |  |
| 757.9843Cu II | 627  | 13.43 | - | 15.07 | 5s 3D | - | 5p 3D | 2 | - | 3 |  |
| 758.0053Cu II | 1    | 14.34 | - | 15.98 | 4d 3P | - | 4p 3D | 1 | - | 2 |  |
| 758.3341Cu II | 0    | 14.45 | - | 16.09 | 4d 3P | - | 4p 3P | 0 | - | 1 |  |
| 758.7332Cu II | 8    | 17.00 | - | 18.63 | 5d 3D | - | 4p 3F | 2 | - | 2 |  |
| 761.1928Cu II | 4    | 17.07 | - | 18.69 | 4p 1D | - | 8s 3D | 2 | - | 2 |  |
| 762.2477Cu II | 1    | 14.34 | - | 15.97 | 4d 3G | - | 4p 3F | 4 | - | 4 |  |
| 762.5434Cu II | 1    | 16.59 | - | 18.22 | 4p 3P | - | 7s 1D | 2 | - | 2 |  |
| 763.4923Cu II | 7    | 17.07 | - | 18.69 | 4p 1D | - | 8s 3D | 2 | - | 3 |  |
| 765.2333Cu II | 1453 | 13.39 | - | 15.01 | 5s 3D | - | 4p 1F | 3 | - | 3 |  |
| 765.4721Cu II | 0    | 16.59 | - | 18.21 | 4p 3P | - | 7s 3D | 2 | - | 1 |  |
| 766.4648Cu II | 1535 | 14.96 | - | 16.58 | 5p 3F | - | 6s 3D | 3 | - | 2 |  |
| 766.8073Cu II | 10   | 16.80 | - | 18.41 | 4p 3P | - | 6d 3D | 0 | - | 1 |  |
| 766.8530Cu II | 0    | 14.39 | - | 16.01 | 4d 3D | - | 4p 3D | 3 | - | 3 |  |
| 767.1267Cu II | 1    | 15.29 | - | 16.90 | 5p 3D | - | 5d 3S | 1 | - | 1 |  |
| 767.6190Cu II | 0    | 15.57 | - | 17.18 | 4p 5P | - | 5d 1P | 1 | - | 1 |  |
| 768.1788Cu II | 63   | 15.22 | - | 16.83 | 5p 3F | - | 6s 1D | 2 | - | 2 |  |
| 768.2941Cu II | 0    | 14.62 | - | 16.23 | 4d 3D | - | 4p 5D | 1 | - | 1 |  |
| 771.8694Cu II | 4    | 16.61 | - | 18.22 | 4p 3D | - | 7s 1D | 3 | - | 2 |  |
| 772.6648Cu II | 390  | 13.68 | - | 15.29 | 5s 1D | - | 5p 3D | 2 | - | 1 |  |
| 773.1619Cu II | 0    | 14.34 | - | 15.94 | 4d 3P | - | 4p 3D | 2 | - | 2 |  |
| 773.8664Cu II | 1151 | 15.22 | - | 16.82 | 5p 3F | - | 6s 3D | 2 | - | 1 |  |
| 774.4097Cu II | 159  | 14.96 | - | 16.56 | 5p 3F | - | 6s 3D | 3 | - | 3 |  |
| 774.4369Cu II | 1    | 16.83 | - | 18.43 | 4p 3F | - | 6d 3F | 3 | - | 2 |  |
| 775.1206Cu II | 5    | 16.83 | - | 18.43 | 4p 3F | - | 6d 1F | 3 | - | 3 |  |
| 775.1753Cu II | 2    | 14.34 | - | 15.94 | 4d 3G | - | 4p 3F | 4 | - | 3 |  |
| 775.4362Cu II | 534  | 15.23 | - | 16.83 | 5p 1P | - | 6s 1D | 1 | - | 2 |  |
| 776.3365Cu II | 7    | 16.80 | - | 18.39 | 4p 3P | - | 6d 1P | 0 | - | 1 |  |
| 776.8468Cu II | 18   | 17.10 | - | 18.69 | 4p 3S | - | 8s 3D | 1 | - | 2 |  |
| 777.3202Cu II | 81   | 13.39 | - | 14.99 | 5s 3D | - | 4p 1D | 3 | - | 2 |  |
| 777.8738Cu II | 672  | 14.99 | - | 16.58 | 4p 1D | - | 6s 3D | 2 | - | 2 |  |
| 779.2931Cu II | 1    | 14.69 | - | 16.28 | 4d 1F | - | 4p 5D | 3 | - | 3 |  |
| 779.4199Cu II | 1    | 16.83 | - | 18.42 | 4p 3F | - | 6d 1D | 3 | - | 2 |  |
| 780.5184Cu II | 723  | 14.99 | - | 16.58 | 5p 3P | - | 6s 3D | 1 | - | 2 |  |
| 780.7659Cu II | 2416 | 14.98 | - | 16.56 | 5p 3F | - | 6s 3D | 4 | - | 3 |  |
| 780.7913Cu II | 187  | 17.10 | - | 18.69 | 4p 3F | - | 8s 3D | 4 | - | 3 |  |
| 781.2317Cu II | 196  | 15.23 | - | 16.82 | 5p 1P | - | 6s 3D | 1 | - | 1 |  |
| 781.5828Cu II | 1    | 14.42 | - | 16.01 | 4d 3F | - | 4p 3D | 3 | - | 3 |  |
| 782.0576Cu II | 344  | 13.65 | - | 15.23 | 5s 3D | - | 5p 1P | 1 | - | 1 |  |
| 782.1181Cu II | 3    | 17.18 | - | 18.77 | 5d 1P | - | 6f 3P | 1 | - | 2 |  |
| 782.1278Cu II | 33   | 16.83 | - | 18.41 | 4p 3F | - | 6d 1G | 3 | - | 4 |  |



|               |      |       |   |       |       |   |       |   |   |   |  |
|---------------|------|-------|---|-------|-------|---|-------|---|---|---|--|
| 782.2334Cu II | 0    | 14.65 | - | 16.24 | 4d 1D | - | 4p 5D | 2 | - | 2 |  |
| 782.2532Cu II | 8    | 15.32 | - | 16.90 | 5p 1D | - | 5d 3S | 2 | - | 1 |  |
| 782.5654Cu II | 4150 | 13.39 | - | 14.98 | 5s 3D | - | 5p 3F | 3 | - | 4 |  |
| 782.6358Cu II | 0    | 14.39 | - | 15.98 | 4d 3D | - | 4p 3D | 3 | - | 2 |  |
| 784.1487Cu II | 1    | 16.59 | - | 18.17 | 4p 3P | - | 6d 3D | 2 | - | 2 |  |
| 784.2004Cu II | 2    | 16.83 | - | 18.41 | 4p 3F | - | 6d 3G | 3 | - | 3 |  |
| 784.3586Cu II | 0    | 14.43 | - | 16.01 | 4d 3F | - | 4p 3D | 4 | - | 3 |  |
| 784.4950Cu II | 11   | 13.43 | - | 15.01 | 5s 3D | - | 4p 1F | 2 | - | 3 |  |
| 784.5081Cu II | 1812 | 15.25 | - | 16.83 | 5p 1F | - | 6s 1D | 3 | - | 2 |  |
| 784.8373Cu II | 6    | 16.66 | - | 18.24 | 4p 3P | - | 6d 3P | 1 | - | 0 |  |
| 785.3016Cu II | 3    | 16.59 | - | 18.17 | 4p 3P | - | 6d 3F | 2 | - | 3 |  |
| 785.3820Cu II | 0    | 14.43 | - | 16.01 | 4d 3D | - | 4p 3D | 2 | - | 3 |  |
| 785.9964Cu II | 0    | 15.18 | - | 16.75 | 4d 1S | - | 4p 3D | 0 | - | 1 |  |
| 786.0577Cu II | 49   | 14.99 | - | 16.56 | 4p 1D | - | 6s 3D | 2 | - | 3 |  |
| 787.3201Cu II | 1    | 14.39 | - | 15.97 | 4d 3D | - | 4p 3F | 3 | - | 4 |  |
| 787.7919Cu II | 1    | 16.86 | - | 18.43 | 4p 5S | - | 6d 3F | 2 | - | 2 |  |
| 788.4994Cu II | 1    | 16.86 | - | 18.43 | 4p 5S | - | 6d 1F | 2 | - | 3 |  |
| 789.0376Cu II | 18   | 16.59 | - | 18.16 | 4p 3P | - | 6d 3D | 2 | - | 3 |  |
| 789.0567Cu II | 253  | 13.39 | - | 14.96 | 5s 3D | - | 5p 3F | 3 | - | 3 |  |
| 789.5805Cu II | 1968 | 13.65 | - | 15.22 | 5s 3D | - | 5p 3F | 1 | - | 2 |  |
| 790.2553Cu II | 3084 | 13.68 | - | 15.25 | 5s 1D | - | 5p 1F | 2 | - | 3 |  |
| 790.3663Cu II | 7    | 15.01 | - | 16.58 | 4p 1F | - | 6s 3D | 3 | - | 2 |  |
| 790.9810Cu II | 0    | 14.60 | - | 16.17 | 4d 3G | - | 4p 3P | 3 | - | 2 |  |
| 792.9488Cu II | 1    | 16.86 | - | 18.42 | 4p 5S | - | 6d 1D | 2 | - | 2 |  |
| 793.3055Cu II | 6    | 16.59 | - | 18.15 | 4p 3P | - | 6d 3P | 2 | - | 1 |  |
| 793.4359Cu II | 2    | 17.21 | - | 18.77 | 5d 3G | - | 6f 3F | 3 | - | 3 |  |
| 794.0141Cu II | 1    | 16.61 | - | 18.17 | 4p 3D | - | 6d 3D | 3 | - | 2 |  |
| 794.0829Cu II | 33   | 16.59 | - | 18.15 | 4p 3P | - | 6d 3P | 2 | - | 2 |  |
| 794.3866Cu II | 1    | 17.21 | - | 18.77 | 5d 3G | - | 6f 3D | 3 | - | 2 |  |
| 794.4438Cu II | 1295 | 13.43 | - | 14.99 | 5s 3D | - | 5p 3P | 2 | - | 1 |  |
| 794.4703Cu II | 0    | 17.21 | - | 18.77 | 5d 3G | - | 6f 3F | 3 | - | 3 |  |
| 794.5894Cu II | 0    | 16.85 | - | 18.41 | 4f 3H | - | 6d 1G | 5 | - | 4 |  |
| 794.9167Cu II | 3    | 16.66 | - | 18.22 | 4p 3P | - | 7s 1D | 1 | - | 2 |  |
| 794.9855Cu II | 146  | 16.61 | - | 18.17 | 4p 3D | - | 6d 3F | 3 | - | 4 |  |
| 795.1962Cu II | 1    | 16.61 | - | 18.17 | 4p 3D | - | 6d 3F | 3 | - | 3 |  |
| 795.3704Cu II | 0    | 16.86 | - | 18.41 | 4p 5S | - | 6d 3D | 2 | - | 1 |  |
| 797.2033Cu II | 1197 | 13.43 | - | 14.99 | 5s 3D | - | 4p 1D | 2 | - | 2 |  |
| 797.4760Cu II | 0    | 17.22 | - | 18.77 | 5d 1G | - | 6f 3F | 4 | - | 3 |  |
| 797.8972Cu II | 0    | 16.86 | - | 18.41 | 4p 5S | - | 6d 3G | 2 | - | 3 |  |
| 797.9704Cu II | 0    | 14.53 | - | 16.09 | 4d 1P | - | 4p 3P | 1 | - | 1 |  |
| 797.9842Cu II | 1    | 14.42 | - | 15.98 | 4d 3F | - | 4p 3D | 3 | - | 2 |  |
| 798.0999Cu II | 1    | 16.66 | - | 18.21 | 4p 3P | - | 7s 3D | 1 | - | 1 |  |

|                |      |       |   |       |       |   |       |   |   |   |  |
|----------------|------|-------|---|-------|-------|---|-------|---|---|---|--|
| 798.2075 Cu II | 0    | 16.87 | - | 18.42 | 4f 3D | - | 6d 1D | 3 | - | 2 |  |
| 798.5209 Cu II | 1    | 17.22 | - | 18.77 | 5d 1G | - | 6f 3F | 4 | - | 3 |  |
| 798.8163 Cu II | 775  | 15.01 | - | 16.56 | 4p 1F | - | 6s 3D | 3 | - | 3 |  |
| 799.0272 Cu II | 109  | 16.61 | - | 18.16 | 4p 3D | - | 6d 3D | 3 | - | 3 |  |
| 799.2937 Cu II | 0    | 16.86 | - | 18.41 | 4f 3D | - | 6d 3D | 2 | - | 1 |  |
| 799.4214 Cu II | 0    | 17.22 | - | 18.77 | 5d 3D | - | 6f 3D | 1 | - | 2 |  |
| 799.6790 Cu II | 964  | 13.68 | - | 15.23 | 5s 1D | - | 5p 1P | 2 | - | 1 |  |
| 799.9171 Cu II | 0    | 16.85 | - | 18.39 | 4f 3P | - | 6d 1P | 1 | - | 1 |  |
| 800.4573 Cu II | 2    | 17.22 | - | 18.77 | 5d 1G | - | 6f 3H | 4 | - | 5 |  |
| 800.4893 Cu II | 0    | 14.39 | - | 15.94 | 4d 3D | - | 4p 3D | 3 | - | 2 |  |
| 801.2557 Cu II | 0    | 17.22 | - | 18.77 | 5d 3D | - | 6f 3P | 1 | - | 2 |  |
| 801.9449 Cu II | 1    | 14.43 | - | 15.98 | 4d 3D | - | 4p 3D | 2 | - | 2 |  |
| 802.3575 Cu II | 0    | 14.69 | - | 16.24 | 4d 1F | - | 4p 5D | 3 | - | 2 |  |
| 802.3859 Cu II | 0    | 16.85 | - | 18.39 | 4f 3P | - | 6d 1P | 0 | - | 1 |  |
| 802.6479 Cu II | 218  | 15.29 | - | 16.83 | 5p 3D | - | 6s 1D | 1 | - | 2 |  |
| 802.8547 Cu II | 0    | 14.42 | - | 15.97 | 4d 3F | - | 4p 3F | 3 | - | 4 |  |
| 803.7096 Cu II | 2    | 16.61 | - | 18.15 | 4p 3D | - | 6d 3G | 3 | - | 4 |  |
| 803.7808 Cu II | 2    | 17.23 | - | 18.77 | 5d 1D | - | 6f 3F | 2 | - | 3 |  |
| 804.2014 Cu II | 40   | 16.61 | - | 18.15 | 4p 3D | - | 6d 3P | 3 | - | 2 |  |
| 804.7564 Cu II | 1    | 17.23 | - | 18.77 | 5d 1D | - | 6f 3D | 2 | - | 2 |  |
| 804.8423 Cu II | 1    | 17.23 | - | 18.77 | 5d 1D | - | 6f 3F | 2 | - | 3 |  |
| 805.6724 Cu II | 0    | 14.70 | - | 16.23 | 4d 3F | - | 4p 5D | 2 | - | 1 |  |
| 805.7839 Cu II | 1    | 14.43 | - | 15.97 | 4d 3F | - | 4p 3F | 4 | - | 4 |  |
| 806.6153 Cu II | 1    | 17.23 | - | 18.77 | 5d 1D | - | 6f 3P | 2 | - | 2 |  |
| 806.8993 Cu II | 23   | 16.59 | - | 18.13 | 4p 3P | - | 6d 3S | 2 | - | 1 |  |
| 807.4995 Cu II | 187  | 17.16 | - | 18.69 | 4p 3G | - | 8s 3D | 3 | - | 2 |  |
| 807.5463 Cu II | 105  | 13.68 | - | 15.22 | 5s 1D | - | 5p 3F | 2 | - | 2 |  |
| 808.8590 Cu II | 548  | 15.29 | - | 16.82 | 5p 3D | - | 6s 3D | 1 | - | 1 |  |
| 809.5523 Cu II | 2518 | 13.43 | - | 14.96 | 5s 3D | - | 5p 3F | 2 | - | 3 |  |
| 810.0878 Cu II | 37   | 17.16 | - | 18.69 | 4p 3G | - | 8s 3D | 3 | - | 3 |  |
| 812.8116 Cu II | 0    | 17.25 | - | 18.77 | 5d 1F | - | 6f 3F | 3 | - | 3 |  |
| 813.8093 Cu II | 0    | 17.25 | - | 18.77 | 5d 1F | - | 6f 3D | 3 | - | 2 |  |
| 813.8971 Cu II | 1    | 17.25 | - | 18.77 | 5d 1F | - | 6f 3F | 3 | - | 3 |  |
| 814.3089 Cu II | 0    | 17.25 | - | 18.77 | 5d 3F | - | 6f 3F | 2 | - | 3 |  |
| 814.7623 Cu II | 2    | 16.85 | - | 18.37 | 4f 3P | - | 5g 3F | 1 | - | 2 |  |
| 815.3833 Cu II | 13   | 16.70 | - | 18.22 | 4p 3D | - | 7s 1D | 2 | - | 2 |  |
| 815.3984 Cu II | 1    | 17.25 | - | 18.77 | 5d 3F | - | 6f 3F | 2 | - | 3 |  |
| 815.7103 Cu II | 0    | 17.25 | - | 18.77 | 5d 1F | - | 6f 3P | 3 | - | 2 |  |
| 816.5532 Cu II | 1    | 14.42 | - | 15.94 | 4d 3F | - | 4p 3D | 3 | - | 2 |  |
| 817.2093 Cu II | 1    | 14.42 | - | 15.94 | 4d 3F | - | 4p 3F | 3 | - | 3 |  |
| 817.2182 Cu II | 1    | 17.25 | - | 18.77 | 5d 3F | - | 6f 3P | 2 | - | 2 |  |

|               |      |       |   |       |       |   |       |   |   |   |  |
|---------------|------|-------|---|-------|-------|---|-------|---|---|---|--|
| 817.8961Cu II | 0    | 14.65 | - | 16.17 | 4d 1D | - | 4p 3P | 2 | - | 2 |  |
| 817.8979Cu II | 1    | 16.85 | - | 18.37 | 4f 3P | - | 5g 3F | 2 | - | 2 |  |
| 817.9027Cu II | 6    | 16.85 | - | 18.37 | 4f 3P | - | 5g 1F | 2 | - | 3 |  |
| 818.4237Cu II | 8    | 16.66 | - | 18.17 | 4p 3P | - | 6d 3D | 1 | - | 2 |  |
| 818.4532Cu II | 1    | 16.85 | - | 18.37 | 4f 3H | - | 5g 1I | 6 | - | 6 |  |
|               |      |       |   |       |       |   |       |   |   |   |  |
| 818.6487Cu II | 0    | 16.85 | - | 18.37 | 4f 3H | - | 5g 3I | 5 | - | 5 |  |
| 818.7329Cu II | 2    | 16.70 | - | 18.21 | 4p 3D | - | 7s 3D | 2 | - | 1 |  |
| 819.2229Cu II | 1038 | 15.32 | - | 16.83 | 5p 1D | - | 6s 1D | 2 | - | 2 |  |
| 819.2336Cu II | 346  | 15.07 | - | 16.58 | 5p 3D | - | 6s 3D | 3 | - | 2 |  |
| 819.4018Cu II | 0    | 16.92 | - | 18.43 | 4p 3D | - | 6d 3F | 3 | - | 2 |  |
|               |      |       |   |       |       |   |       |   |   |   |  |
| 820.1673Cu II | 1    | 16.92 | - | 18.43 | 4p 3D | - | 6d 1F | 3 | - | 3 |  |
| 820.2444Cu II | 0    | 14.43 | - | 15.94 | 4d 3F | - | 4p 3F | 4 | - | 3 |  |
| 820.9494Cu II | 7    | 16.86 | - | 18.37 | 4f 3F | - | 5g 1G | 3 | - | 4 |  |
| 820.9514Cu II | 1    | 16.86 | - | 18.37 | 4f 3F | - | 5g 3G | 3 | - | 3 |  |
| 821.0863Cu II | 1    | 16.86 | - | 18.37 | 4f 1P | - | 5g 3F | 1 | - | 2 |  |
|               |      |       |   |       |       |   |       |   |   |   |  |
| 821.3636Cu II | 0    | 14.43 | - | 15.94 | 4d 3D | - | 4p 3F | 2 | - | 3 |  |
| 822.5760Cu II | 5    | 16.86 | - | 18.37 | 4f 3D | - | 5g 3G | 2 | - | 3 |  |
| 823.2314Cu II | 0    | 16.86 | - | 18.37 | 4f 3F | - | 5g 3F | 3 | - | 2 |  |
| 823.2363Cu II | 1    | 16.86 | - | 18.37 | 4f 3F | - | 5g 1F | 3 | - | 3 |  |
| 823.2380Cu II | 1    | 16.87 | - | 18.37 | 4f 3D | - | 5g 3H | 3 | - | 4 |  |
|               |      |       |   |       |       |   |       |   |   |   |  |
| 823.5279Cu II | 447  | 13.65 | - | 15.15 | 5s 3D | - | 5p 3P | 1 | - | 0 |  |
| 824.0246Cu II | 0    | 16.87 | - | 18.37 | 4f 3D | - | 5g 3G | 3 | - | 3 |  |
| 824.8652Cu II | 1    | 16.86 | - | 18.37 | 4f 3D | - | 5g 3F | 2 | - | 2 |  |
| 824.8701Cu II | 0    | 16.86 | - | 18.37 | 4f 3D | - | 5g 1F | 2 | - | 3 |  |
| 825.6941Cu II | 107  | 15.32 | - | 16.82 | 5p 1D | - | 6s 3D | 2 | - | 1 |  |
|               |      |       |   |       |       |   |       |   |   |   |  |
| 827.7560Cu II | 2075 | 13.39 | - | 14.89 | 5s 3D | - | 5p 3P | 3 | - | 2 |  |
| 828.0167Cu II | 1    | 16.92 | - | 18.41 | 4p 3D | - | 6d 1G | 3 | - | 4 |  |
| 828.3160Cu II | 828  | 15.07 | - | 16.56 | 5p 3D | - | 6s 3D | 3 | - | 3 |  |
| 828.4036Cu II | 9    | 16.66 | - | 18.15 | 4p 3P | - | 6d 3P | 1 | - | 1 |  |
| 829.8951Cu II | 1    | 16.88 | - | 18.37 | 4f 3F | - | 5g 1H | 4 | - | 5 |  |
|               |      |       |   |       |       |   |       |   |   |   |  |
| 829.8973Cu II | 1    | 16.88 | - | 18.37 | 4f 3F | - | 5g 3H | 4 | - | 4 |  |
| 830.0039Cu II | 0    | 15.57 | - | 17.06 | 4p 5P | - | 5d 3P | 1 | - | 0 |  |
| 830.6966Cu II | 0    | 16.88 | - | 18.37 | 4f 3F | - | 5g 3G | 4 | - | 3 |  |
| 831.8175Cu II | 2    | 16.88 | - | 18.37 | 4f 3G | - | 5g 1H | 5 | - | 5 |  |
| 831.8197Cu II | 0    | 16.88 | - | 18.37 | 4f 3G | - | 5g 3H | 5 | - | 4 |  |
|               |      |       |   |       |       |   |       |   |   |   |  |
| 832.2018Cu II | 9    | 16.88 | - | 18.37 | 4f 3F | - | 5g 3I | 4 | - | 5 |  |
| 832.6208Cu II | 0    | 16.88 | - | 18.37 | 4f 3G | - | 5g 1G | 5 | - | 4 |  |
| 833.8107Cu II | 23   | 17.01 | - | 18.50 | 4p 1P | - | 6d 1S | 1 | - | 0 |  |
| 834.1327Cu II | 11   | 16.88 | - | 18.37 | 4f 3G | - | 5g 1I | 5 | - | 6 |  |
| 834.1350Cu II | 1    | 16.88 | - | 18.37 | 4f 3G | - | 5g 3I | 5 | - | 5 |  |
|               |      |       |   |       |       |   |       |   |   |   |  |
| 835.7039Cu II | 7    | 16.75 | - | 18.24 | 4p 3D | - | 6d 3P | 1 | - | 0 |  |
| 839.4575Cu II | 1    | 16.90 | - | 18.37 | 4f 3G | - | 5g 1H | 4 | - | 5 |  |

|                |     |       |   |       |       |   |       |   |   |   |
|----------------|-----|-------|---|-------|-------|---|-------|---|---|---|
| 839.4597 Cu II | 1   | 16.90 | - | 18.37 | 4f 3G | - | 5g 3H | 4 | - | 4 |
| 839.9228 Cu II | 1   | 14.69 | - | 16.17 | 4d 1F | - | 4p 3P | 3 | - | 2 |
| 840.1352 Cu II | 8   | 16.70 | - | 18.17 | 4p 3D | - | 6d 3D | 2 | - | 2 |
| 840.2756 Cu II | 0   | 16.90 | - | 18.37 | 4f 3G | - | 5g 1G | 4 | - | 4 |
| 840.2906 Cu II | 121 | 13.65 | - | 15.12 | 5s 3D | - | 5p 3D | 1 | - | 2 |
| 841.4587 Cu II | 9   | 16.70 | - | 18.17 | 4p 3D | - | 6d 3F | 2 | - | 3 |
| 841.8178 Cu II | 1   | 16.90 | - | 18.37 | 4f 3G | - | 5g 3I | 4 | - | 5 |
| 843.2381 Cu II | 2   | 16.66 | - | 18.13 | 4p 3P | - | 6d 3S | 1 | - | 1 |
| 843.3302 Cu II | 0   | 14.70 | - | 16.17 | 4d 3F | - | 4p 3P | 2 | - | 2 |
| 844.1951 Cu II | 8   | 16.96 | - | 18.43 | 4p 3F | - | 6d 3F | 2 | - | 2 |
| 844.9671 Cu II | 0   | 14.62 | - | 16.09 | 4d 3D | - | 4p 3P | 1 | - | 1 |
| 845.0076 Cu II | 127 | 16.96 | - | 18.43 | 4p 3F | - | 6d 1F | 2 | - | 3 |
| 845.7496 Cu II | 8   | 16.70 | - | 18.16 | 4p 3D | - | 6d 3D | 2 | - | 3 |
| 846.0165 Cu II | 15  | 16.71 | - | 18.17 | 4p 3H | - | 6d 3F | 4 | - | 4 |
| 846.1946 Cu II | 2   | 15.53 | - | 16.99 | 4p 5P | - | 5d 3F | 3 | - | 4 |
| 846.2551 Cu II | 1   | 16.71 | - | 18.17 | 4p 3H | - | 6d 3F | 4 | - | 3 |
| 846.8891 Cu II | 0   | 15.53 | - | 16.99 | 4p 5P | - | 5d 3F | 3 | - | 3 |
| 847.1417 Cu II | 2   | 16.75 | - | 18.22 | 4p 3D | - | 7s 1D | 1 | - | 2 |
| 848.1836 Cu II | 0   | 15.53 | - | 16.99 | 4p 5P | - | 5d 3F | 2 | - | 3 |
| 850.1196 Cu II | 42  | 16.96 | - | 18.42 | 4p 3F | - | 6d 1D | 2 | - | 2 |
| 850.3396 Cu II | 111 | 13.43 | - | 14.89 | 5s 3D | - | 5p 3P | 2 | - | 2 |
| 850.5585 Cu II | 75  | 17.24 | - | 18.69 | 4p 3D | - | 8s 3D | 2 | - | 2 |
| 850.5952 Cu II | 4   | 16.71 | - | 18.16 | 4p 3H | - | 6d 3D | 4 | - | 3 |
| 850.6550 Cu II | 0   | 16.70 | - | 18.15 | 4p 3D | - | 6d 3P | 2 | - | 1 |
| 850.7579 Cu II | 10  | 16.75 | - | 18.21 | 4p 3D | - | 7s 3D | 1 | - | 1 |
| 851.1061 Cu II | 481 | 15.12 | - | 16.58 | 5p 3D | - | 6s 3D | 2 | - | 2 |
| 851.5488 Cu II | 7   | 16.70 | - | 18.15 | 4p 3D | - | 6d 3P | 2 | - | 2 |
| 852.9036 Cu II | 2   | 16.96 | - | 18.41 | 4p 3F | - | 6d 3D | 2 | - | 1 |
| 853.4306 Cu II | 120 | 17.24 | - | 18.69 | 4p 3D | - | 8s 3D | 2 | - | 3 |
| 855.2519 Cu II | 2   | 15.53 | - | 16.98 | 4p 5P | - | 5d 3D | 3 | - | 3 |
| 855.8099 Cu II | 25  | 16.96 | - | 18.41 | 4p 3F | - | 6d 3G | 2 | - | 3 |
| 855.9034 Cu II | 3   | 16.71 | - | 18.15 | 4p 3H | - | 6d 3G | 4 | - | 4 |
| 855.9833 Cu II | 8   | 16.90 | - | 18.35 | 5d 3S | - | 5f 3D | 1 | - | 1 |
| 856.5722 Cu II | 0   | 15.53 | - | 16.98 | 4p 5P | - | 5d 3D | 2 | - | 3 |
| 857.4080 Cu II | 57  | 16.71 | - | 18.15 | 4p 3H | - | 6d 3G | 4 | - | 5 |
| 857.6295 Cu II | 1   | 17.18 | - | 18.63 | 5d 1P | - | 4p 3F | 1 | - | 2 |
| 858.0995 Cu II | 46  | 16.90 | - | 18.35 | 5d 3S | - | 5f 1D | 1 | - | 2 |
| 860.1532 Cu II | 1   | 14.53 | - | 15.98 | 4d 1P | - | 4p 3D | 1 | - | 2 |
| 860.6679 Cu II | 231 | 13.68 | - | 15.12 | 5s 1D | - | 5p 3D | 2 | - | 2 |
| 860.9134 Cu II | 11  | 15.12 | - | 16.56 | 5p 3D | - | 6s 3D | 2 | - | 3 |
| 862.0938 Cu II | 1   | 14.65 | - | 16.09 | 4d 1D | - | 4p 3P | 2 | - | 1 |
| 864.4931 Cu II | 0   | 17.00 | - | 18.43 | 4p 3G | - | 6d 3F | 3 | - | 2 |

|               |     |       |   |       |       |   |       |   |   |   |
|---------------|-----|-------|---|-------|-------|---|-------|---|---|---|
| 864.7093Cu II | 13  | 16.96 | - | 18.39 | 4p 3F | - | 6d 1P | 2 | - | 1 |
| 865.3452Cu II | 1   | 17.00 | - | 18.43 | 4p 3G | - | 6d 1F | 3 | - | 3 |
| 866.2136Cu II | 100 | 17.26 | - | 18.69 | 6p 3P | - | 8s 3D | 1 | - | 2 |
| 866.3046Cu II | 8   | 16.70 | - | 18.13 | 4p 3D | - | 6d 3S | 2 | - | 1 |
| 866.6693Cu II | 1   | 15.53 | - | 16.96 | 4p 5P | - | 5d 3G | 3 | - | 4 |
| 867.3960Cu II | 63  | 17.26 | - | 18.69 | 6p 3P | - | 8s 3D | 2 | - | 3 |
| 867.5154Cu II | 1   | 15.53 | - | 16.96 | 4p 5P | - | 5d 3P | 3 | - | 2 |
| 868.8739Cu II | 1   | 15.53 | - | 16.96 | 4p 5P | - | 5d 3P | 2 | - | 2 |
| 870.7070Cu II | 0   | 17.00 | - | 18.42 | 4p 3G | - | 6d 1D | 3 | - | 2 |
| 873.0232Cu II | 74  | 17.28 | - | 18.69 | 6p 3F | - | 8s 3D | 3 | - | 2 |
| 873.8909Cu II | 10  | 16.75 | - | 18.17 | 4p 3D | - | 6d 3D | 1 | - | 2 |
| 874.0877Cu II | 2   | 17.00 | - | 18.41 | 4p 3G | - | 6d 1G | 3 | - | 4 |
| 874.5886Cu II | 5   | 17.21 | - | 18.63 | 5d 3G | - | 4p 3F | 3 | - | 2 |
| 874.6725Cu II | 11  | 17.01 | - | 18.43 | 4p 1P | - | 6d 3F | 1 | - | 2 |
| 876.0494Cu II | 156 | 17.28 | - | 18.69 | 6p 3F | - | 8s 3D | 3 | - | 3 |
| 876.6771Cu II | 0   | 17.00 | - | 18.41 | 4p 3G | - | 6d 3G | 3 | - | 3 |
| 876.7914Cu II | 7   | 16.80 | - | 18.21 | 4p 3P | - | 7s 3D | 0 | - | 1 |
| 880.6953Cu II | 1   | 17.22 | - | 18.63 | 5d 3D | - | 4p 3F | 1 | - | 2 |
| 880.9028Cu II | 2   | 16.96 | - | 18.36 | 5d 3P | - | 5f 3G | 2 | - | 3 |
| 881.0341Cu II | 13  | 17.01 | - | 18.42 | 4p 1P | - | 6d 1D | 1 | - | 2 |
| 881.0399Cu II | 187 | 17.28 | - | 18.69 | 6p 3F | - | 8s 3D | 4 | - | 3 |
| 881.5924Cu II | 3   | 16.96 | - | 18.36 | 5d 3G | - | 5f 1G | 4 | - | 4 |
| 881.7673Cu II | 0   | 14.53 | - | 15.94 | 4d 1P | - | 4p 3D | 1 | - | 2 |
| 881.7770Cu II | 0   | 16.96 | - | 18.36 | 5d 3G | - | 5f 3G | 4 | - | 3 |
| 883.7822Cu II | 1   | 16.96 | - | 18.36 | 5d 3P | - | 5f 3F | 2 | - | 2 |
| 884.0246Cu II | 10  | 17.01 | - | 18.41 | 4p 1P | - | 6d 3D | 1 | - | 1 |
| 884.1372Cu II | 2   | 16.96 | - | 18.36 | 5d 3P | - | 5f 1F | 2 | - | 3 |
| 884.4877Cu II | 1   | 16.95 | - | 18.35 | 5d 3G | - | 5f 1H | 5 | - | 5 |
| 885.0178Cu II | 1   | 16.96 | - | 18.36 | 5d 3G | - | 5f 1F | 4 | - | 3 |
| 885.2741Cu II | 1   | 16.96 | - | 18.36 | 5d 3P | - | 5f 3F | 1 | - | 2 |
| 885.2788Cu II | 10  | 16.75 | - | 18.15 | 4p 3D | - | 6d 3P | 1 | - | 1 |
| 885.5624Cu II | 1   | 17.10 | - | 18.50 | 4p 3S | - | 6d 1S | 1 | - | 0 |
| 887.1745Cu II | 1   | 17.23 | - | 18.63 | 5d 1D | - | 4p 3F | 2 | - | 2 |
| 887.5899Cu II | 17  | 16.96 | - | 18.35 | 5d 3G | - | 5f 1H | 4 | - | 5 |
| 887.6943Cu II | 0   | 16.96 | - | 18.35 | 5d 3P | - | 5f 3D | 2 | - | 1 |
| 889.1994Cu II | 1   | 16.96 | - | 18.35 | 5d 3P | - | 5f 3D | 1 | - | 1 |
| 889.8982Cu II | 1   | 16.85 | - | 18.24 | 4f 3P | - | 6d 3P | 1 | - | 0 |
| 889.9704Cu II | 1   | 16.96 | - | 18.35 | 5d 3P | - | 5f 1D | 2 | - | 2 |
| 890.3985Cu II | 0   | 14.70 | - | 16.09 | 4d 3F | - | 4p 3P | 2 | - | 1 |
| 891.4833Cu II | 0   | 16.96 | - | 18.35 | 5d 3P | - | 5f 1D | 1 | - | 2 |
| 892.3816Cu II | 14  | 16.83 | - | 18.22 | 4p 3F | - | 7s 1D | 3 | - | 2 |

|               |    |       |   |       |       |   |       |   |   |   |
|---------------|----|-------|---|-------|-------|---|-------|---|---|---|
| 893.7289Cu II | 12 | 16.98 | - | 18.36 | 5d 3D | - | 5f 1G | 3 | - | 4 |
| 893.9186Cu II | 1  | 16.98 | - | 18.36 | 5d 3D | - | 5f 3G | 3 | - | 3 |
| 894.6713Cu II | 5  | 17.11 | - | 18.50 | 4f 3D | - | 6d 1S | 1 | - | 0 |
| 895.9155Cu II | 7  | 13.68 | - | 15.07 | 5s 1D | - | 5p 3D | 2 | - | 3 |
| 896.7140Cu II | 20 | 17.01 | - | 18.39 | 4p 1P | - | 6d 1P | 1 | - | 1 |
| 896.8838Cu II | 0  | 16.98 | - | 18.36 | 5d 3D | - | 5f 3F | 3 | - | 2 |
| 897.2494Cu II | 1  | 16.98 | - | 18.36 | 5d 3D | - | 5f 1F | 3 | - | 3 |
| 897.4477Cu II | 4  | 16.86 | - | 18.24 | 4f 1P | - | 6d 3P | 1 | - | 0 |
| 898.1894Cu II | 3  | 17.25 | - | 18.63 | 5d 1F | - | 4p 3F | 3 | - | 2 |
| 899.5018Cu II | 1  | 16.98 | - | 18.35 | 5d 3D | - | 5f 3H | 3 | - | 4 |
| 900.0180Cu II | 3  | 17.25 | - | 18.63 | 5d 3F | - | 4p 3F | 2 | - | 2 |
| 900.1106Cu II | 1  | 14.60 | - | 15.98 | 4d 3G | - | 4p 3D | 3 | - | 2 |
| 901.5654Cu II | 0  | 15.53 | - | 16.90 | 4p 5P | - | 5d 3S | 2 | - | 1 |
| 902.2410Cu II | 3  | 16.75 | - | 18.13 | 4p 3D | - | 6d 3S | 1 | - | 1 |
| 902.9344Cu II | 20 | 17.32 | - | 18.69 | 6p 3D | - | 8s 3D | 2 | - | 2 |
| 903.0475Cu II | 0  | 16.99 | - | 18.36 | 5d 3F | - | 5f 1G | 3 | - | 4 |
| 903.2411Cu II | 6  | 16.99 | - | 18.36 | 5d 3F | - | 5f 3G | 3 | - | 3 |
| 903.8384Cu II | 4  | 16.99 | - | 18.36 | 5d 3F | - | 5f 1G | 4 | - | 4 |
| 904.0324Cu II | 0  | 16.99 | - | 18.36 | 5d 3F | - | 5f 3G | 4 | - | 3 |
| 904.1511Cu II | 1  | 16.59 | - | 17.96 | 4p 3P | - | 7s 3D | 2 | - | 2 |
| 905.4374Cu II | 22 | 17.33 | - | 18.69 | 6p 3D | - | 8s 3D | 3 | - | 2 |
| 906.1719Cu II | 3  | 17.32 | - | 18.69 | 6p 3D | - | 8s 3D | 2 | - | 3 |
| 906.2686Cu II | 1  | 16.99 | - | 18.36 | 5d 3F | - | 5f 3F | 3 | - | 2 |
| 906.4242Cu II | 0  | 17.00 | - | 18.36 | 5d 3D | - | 5f 3G | 2 | - | 3 |
| 906.7975Cu II | 17 | 13.39 | - | 14.76 | 5s 3D | - | 4p 3F | 3 | - | 2 |
| 907.4392Cu II | 1  | 16.99 | - | 18.36 | 5d 3F | - | 5f 1F | 4 | - | 3 |
| 908.6928Cu II | 58 | 17.33 | - | 18.69 | 6p 3D | - | 8s 3D | 3 | - | 3 |
| 908.9418Cu II | 25 | 16.99 | - | 18.35 | 5d 3F | - | 5f 3H | 3 | - | 4 |
| 909.3633Cu II | 15 | 17.07 | - | 18.43 | 4p 1D | - | 6d 3F | 2 | - | 2 |
| 909.4731Cu II | 4  | 17.00 | - | 18.36 | 5d 3D | - | 5f 3F | 2 | - | 2 |
| 909.7431Cu II | 1  | 16.99 | - | 18.35 | 5d 3F | - | 5f 3H | 4 | - | 4 |
| 909.7520Cu II | 35 | 16.59 | - | 17.95 | 4p 3P | - | 7s 3D | 2 | - | 3 |
| 909.8491Cu II | 23 | 17.00 | - | 18.36 | 5d 3D | - | 5f 1F | 2 | - | 3 |
| 910.1435Cu II | 13 | 16.99 | - | 18.35 | 5d 3F | - | 5f 1H | 4 | - | 5 |
| 910.1609Cu II | 1  | 16.86 | - | 18.22 | 4p 5S | - | 7s 1D | 2 | - | 2 |
| 910.3062Cu II | 78 | 17.07 | - | 18.43 | 4p 1D | - | 6d 1F | 2 | - | 3 |
| 910.3234Cu II | 66 | 15.22 | - | 16.58 | 5p 3F | - | 6s 3D | 2 | - | 2 |
| 910.7881Cu II | 10 | 13.39 | - | 14.75 | 5s 3D | - | 4p 1G | 3 | - | 4 |
| 913.6165Cu II | 1  | 17.00 | - | 18.35 | 5d 3D | - | 5f 3D | 2 | - | 1 |
| 914.3364Cu II | 0  | 16.86 | - | 18.21 | 4p 5S | - | 7s 3D | 2 | - | 1 |
| 915.0116Cu II | 1  | 14.62 | - | 15.98 | 4d 3D | - | 4p 3D | 1 | - | 2 |
| 916.0277Cu II | 5  | 17.00 | - | 18.35 | 5d 3D | - | 5f 1D | 2 | - | 2 |

|               |     |       |   |       |       |   |       |   |   |   |
|---------------|-----|-------|---|-------|-------|---|-------|---|---|---|
| 916.2416Cu II | 25  | 17.07 | - | 18.42 | 4p 1D | - | 6d 1D | 2 | - | 2 |
| 917.2923Cu II | 8   | 16.61 | - | 17.96 | 4p 3D | - | 7s 3D | 3 | - | 2 |
| 917.6050Cu II | 0   | 14.62 | - | 15.97 | 4d 1G | - | 4p 3F | 4 | - | 4 |
| 919.4763Cu II | 3   | 17.07 | - | 18.41 | 4p 1D | - | 6d 3D | 2 | - | 1 |
| 920.5323Cu II | 69  | 15.23 | - | 16.58 | 5p 1P | - | 6s 3D | 1 | - | 2 |
| 921.5519Cu II | 3   | 15.22 | - | 16.56 | 5p 3F | - | 6s 3D | 2 | - | 3 |
| 922.1142Cu II | 3   | 16.83 | - | 18.17 | 4p 3F | - | 6d 3D | 3 | - | 2 |
| 922.6737Cu II | 46  | 13.65 | - | 14.99 | 5s 3D | - | 5p 3P | 1 | - | 1 |
| 922.8549Cu II | 1   | 17.07 | - | 18.41 | 4p 1D | - | 6d 3G | 2 | - | 3 |
| 923.0578Cu II | 118 | 16.61 | - | 17.95 | 4p 3D | - | 7s 3D | 3 | - | 3 |
| 923.1421Cu II | 0   | 16.09 | - | 17.43 | 4p 3P | - | 5d 1S | 1 | - | 0 |
| 923.4246Cu II | 391 | 16.83 | - | 18.17 | 4p 3F | - | 6d 3F | 3 | - | 4 |
| 923.7088Cu II | 1   | 16.83 | - | 18.17 | 4p 3F | - | 6d 3F | 3 | - | 3 |
| 923.8071Cu II | 4   | 14.60 | - | 15.94 | 4d 3G | - | 4p 3D | 3 | - | 2 |
| 924.6470Cu II | 0   | 14.60 | - | 15.94 | 4d 3G | - | 4p 3F | 3 | - | 3 |
| 926.3975Cu II | 8   | 13.65 | - | 14.99 | 5s 3D | - | 4p 1D | 1 | - | 2 |
| 928.8822Cu II | 272 | 16.83 | - | 18.16 | 4p 3F | - | 6d 3D | 3 | - | 3 |
| 931.5749Cu II | 0   | 16.80 | - | 18.13 | 4p 3P | - | 6d 3S | 0 | - | 1 |
| 931.7944Cu II | 224 | 17.10 | - | 18.43 | 4p 3S | - | 6d 3F | 1 | - | 2 |
| 932.1412Cu II | 6   | 16.84 | - | 18.17 | 4p 3F | - | 6d 3F | 4 | - | 4 |
| 932.4309Cu II | 0   | 16.84 | - | 18.17 | 4p 3F | - | 6d 3F | 4 | - | 3 |
| 933.1896Cu II | 112 | 13.68 | - | 15.01 | 5s 1D | - | 4p 1F | 2 | - | 3 |
| 933.2118Cu II | 11  | 17.07 | - | 18.39 | 4p 1D | - | 6d 1P | 2 | - | 1 |
| 933.3272Cu II | 1   | 16.85 | - | 18.17 | 4f 3P | - | 6d 3D | 1 | - | 2 |
| 933.3448Cu II | 3   | 15.25 | - | 16.58 | 5p 1F | - | 6s 3D | 3 | - | 2 |
| 933.9714Cu II | 33  | 13.43 | - | 14.76 | 5s 3D | - | 4p 3F | 2 | - | 2 |
| 935.0054Cu II | 1   | 17.10 | - | 18.43 | 4p 3F | - | 6d 1F | 4 | - | 3 |
| 935.1291Cu II | 1   | 14.65 | - | 15.98 | 4d 1D | - | 4p 3D | 2 | - | 2 |
| 935.2162Cu II | 0   | 16.83 | - | 18.15 | 4p 3F | - | 6d 3G | 3 | - | 4 |
| 935.8822Cu II | 97  | 16.83 | - | 18.15 | 4p 3F | - | 6d 3P | 3 | - | 2 |
| 936.4043Cu II | 4   | 14.62 | - | 15.94 | 4d 1G | - | 4p 3F | 4 | - | 3 |
| 937.4440Cu II | 3   | 16.85 | - | 18.17 | 4f 3P | - | 6d 3D | 2 | - | 2 |
| 937.7027Cu II | 2   | 16.84 | - | 18.16 | 4p 3F | - | 6d 3D | 4 | - | 3 |
| 939.0176Cu II | 105 | 17.10 | - | 18.42 | 4p 3S | - | 6d 1D | 1 | - | 2 |
| 939.0922Cu II | 0   | 16.85 | - | 18.17 | 4f 3P | - | 6d 3F | 2 | - | 3 |
| 939.5098Cu II | 0   | 14.62 | - | 15.94 | 4d 3D | - | 4p 3D | 1 | - | 2 |
| 939.6266Cu II | 1   | 17.11 | - | 18.43 | 4f 1D | - | 6d 3F | 2 | - | 2 |
| 940.6333Cu II | 1   | 17.11 | - | 18.43 | 4f 1D | - | 6d 1F | 2 | - | 3 |
| 940.8455Cu II | 1   | 16.85 | - | 18.17 | 4f 3H | - | 6d 3F | 5 | - | 4 |
| 941.1105Cu II | 1   | 16.86 | - | 18.17 | 4p 5S | - | 6d 3D | 2 | - | 2 |
| 941.6350Cu II | 1   | 16.86 | - | 18.17 | 4f 1P | - | 6d 3D | 1 | - | 2 |
| 941.8846Cu II | 1   | 17.11 | - | 18.43 | 4f 3D | - | 6d 3F | 1 | - | 2 |

|               |     |       |   |       |       |   |       |   |   |   |
|---------------|-----|-------|---|-------|-------|---|-------|---|---|---|
| 942.4154Cu II | 131 | 17.10 | - | 18.41 | 4p 3S | - | 6d 3D | 1 | - | 1 |
| 944.1580Cu II | 1   | 16.84 | - | 18.15 | 4p 3F | - | 6d 3G | 4 | - | 4 |
| 944.4397Cu II | 2   | 16.85 | - | 18.16 | 4f 3P | - | 6d 3D | 2 | - | 3 |
| 944.4573Cu II | 4   | 16.86 | - | 18.17 | 4f 3F | - | 6d 3D | 3 | - | 2 |
| 944.6769Cu II | 1   | 15.94 | - | 17.25 | 4p 3F | - | 5d 3F | 3 | - | 2 |
| 945.1521Cu II | 7   | 15.25 | - | 16.56 | 5p 1F | - | 6s 3D | 3 | - | 3 |
| 945.2204Cu II | 2   | 17.10 | - | 18.41 | 4p 3F | - | 6d 1G | 4 | - | 4 |
| 945.5552Cu II | 2   | 15.94 | - | 17.25 | 4p 3D | - | 5d 3F | 2 | - | 2 |
| 945.8320Cu II | 2   | 16.86 | - | 18.17 | 4f 3F | - | 6d 3F | 3 | - | 4 |
| 945.9891Cu II | 20  | 16.84 | - | 18.15 | 4p 3F | - | 6d 3G | 4 | - | 5 |
| 946.1303Cu II | 1   | 16.86 | - | 18.17 | 4f 3F | - | 6d 3F | 3 | - | 3 |
| 946.6082Cu II | 4   | 16.86 | - | 18.17 | 4f 3D | - | 6d 3D | 2 | - | 2 |
| 946.6999Cu II | 3   | 15.94 | - | 17.25 | 4p 3F | - | 5d 1F | 3 | - | 3 |
| 946.9722Cu II | 4   | 17.11 | - | 18.42 | 4f 1D | - | 6d 1D | 2 | - | 2 |
| 947.1124Cu II | 0   | 17.12 | - | 18.43 | 4f 3H | - | 6d 1F | 4 | - | 3 |
| 947.3011Cu II | 32  | 13.68 | - | 14.99 | 5s 1D | - | 5p 3P | 2 | - | 1 |
| 947.4346Cu II | 3   | 16.85 | - | 18.15 | 4f 3P | - | 6d 3P | 1 | - | 2 |
| 947.5820Cu II | 4   | 15.94 | - | 17.25 | 4p 3D | - | 5d 1F | 2 | - | 3 |
| 948.1613Cu II | 7   | 16.86 | - | 18.16 | 4p 5S | - | 6d 3D | 2 | - | 3 |
| 948.2492Cu II | 0   | 17.10 | - | 18.41 | 4p 3F | - | 6d 3G | 4 | - | 3 |
| 948.2889Cu II | 1   | 16.86 | - | 18.17 | 4f 3D | - | 6d 3F | 2 | - | 3 |
| 948.5271Cu II | 11  | 16.87 | - | 18.17 | 4f 3D | - | 6d 3D | 3 | - | 2 |
| 949.2656Cu II | 1   | 17.11 | - | 18.42 | 4f 3D | - | 6d 1D | 1 | - | 2 |
| 949.4018Cu II | 2   | 15.53 | - | 16.83 | 4p 5P | - | 6s 1D | 3 | - | 2 |
| 949.7855Cu II | 1   | 16.85 | - | 18.15 | 4f 3P | - | 6d 3P | 0 | - | 1 |
| 949.9137Cu II | 1   | 16.87 | - | 18.17 | 4f 3D | - | 6d 3F | 3 | - | 4 |
| 950.0262Cu II | 10  | 16.66 | - | 17.96 | 4p 3P | - | 7s 3D | 1 | - | 2 |
| 950.2145Cu II | 7   | 16.87 | - | 18.17 | 4f 3D | - | 6d 3F | 3 | - | 3 |
| 950.4279Cu II | 1   | 17.11 | - | 18.41 | 4f 1D | - | 6d 3D | 2 | - | 1 |
| 950.5608Cu II | 1   | 16.85 | - | 18.15 | 4f 3P | - | 6d 3P | 2 | - | 1 |
| 951.0291Cu II | 5   | 15.53 | - | 16.83 | 4p 5P | - | 6s 1D | 2 | - | 2 |
| 951.0369Cu II | 1   | 17.13 | - | 18.43 | 4f 1F | - | 6d 3F | 3 | - | 2 |
| 951.2268Cu II | 114 | 13.68 | - | 14.99 | 5s 1D | - | 4p 1D | 2 | - | 2 |
| 951.5585Cu II | 10  | 16.86 | - | 18.16 | 4f 3F | - | 6d 3D | 3 | - | 3 |
| 951.6771Cu II | 6   | 16.85 | - | 18.15 | 4f 3P | - | 6d 3P | 2 | - | 2 |
| 952.0683Cu II | 6   | 17.13 | - | 18.43 | 4f 1F | - | 6d 1F | 3 | - | 3 |
| 952.6179Cu II | 1   | 16.92 | - | 18.22 | 4p 3D | - | 7s 1D | 3 | - | 2 |
| 952.7381Cu II | 2   | 17.11 | - | 18.41 | 4f 3D | - | 6d 3D | 1 | - | 1 |
| 953.0892Cu II | 32  | 16.85 | - | 18.15 | 4f 3H | - | 6d 3G | 5 | - | 4 |
| 953.7420Cu II | 1   | 16.86 | - | 18.16 | 4f 3D | - | 6d 3D | 2 | - | 3 |
| 954.3309Cu II | 2   | 16.86 | - | 18.15 | 4p 5S | - | 6d 3P | 2 | - | 1 |



|               |     |       |   |       |       |   |       |   |   |   |
|---------------|-----|-------|---|-------|-------|---|-------|---|---|---|
| 954.6923Cu II | 40  | 16.85 | - | 18.15 | 4f 3H | - | 6d 3G | 6 | - | 5 |
| 954.8703Cu II | 5   | 16.86 | - | 18.15 | 4f 1P | - | 6d 3P | 1 | - | 1 |
| 954.9552Cu II | 1   | 16.85 | - | 18.15 | 4f 3H | - | 6d 3G | 5 | - | 5 |
| 955.2485Cu II | 5   | 17.13 | - | 18.43 | 4f 3F | - | 6d 3F | 2 | - | 2 |
| 955.4561Cu II | 11  | 16.86 | - | 18.15 | 4p 5S | - | 6d 3P | 2 | - | 2 |
|               |     |       |   |       |       |   |       |   |   |   |
| 955.6899Cu II | 2   | 16.87 | - | 18.16 | 4f 3D | - | 6d 3D | 3 | - | 3 |
| 955.9967Cu II | 1   | 16.86 | - | 18.15 | 4f 1P | - | 6d 3P | 1 | - | 2 |
| 956.2890Cu II | 1   | 17.13 | - | 18.43 | 4f 3F | - | 6d 1F | 2 | - | 3 |
| 956.5611Cu II | 33  | 17.12 | - | 18.41 | 4f 1H | - | 6d 1G | 5 | - | 4 |
| 956.8501Cu II | 6   | 17.10 | - | 18.39 | 4p 3S | - | 6d 1P | 1 | - | 1 |
|               |     |       |   |       |       |   |       |   |   |   |
| 957.5952Cu II | 1   | 17.12 | - | 18.41 | 4f 3H | - | 6d 1G | 4 | - | 4 |
| 958.2067Cu II | 0   | 16.86 | - | 18.15 | 4f 3F | - | 6d 3G | 3 | - | 4 |
| 958.5627Cu II | 16  | 17.13 | - | 18.42 | 4f 1F | - | 6d 1D | 3 | - | 2 |
| 958.7911Cu II | 2   | 16.88 | - | 18.17 | 4f 3F | - | 6d 3F | 4 | - | 4 |
| 958.9058Cu II | 7   | 16.86 | - | 18.15 | 4f 3F | - | 6d 3P | 3 | - | 2 |
|               |     |       |   |       |       |   |       |   |   |   |
| 959.0975Cu II | 16  | 16.88 | - | 18.17 | 4f 3F | - | 6d 3F | 4 | - | 3 |
| 959.1336Cu II | 1   | 15.29 | - | 16.58 | 5p 3D | - | 6s 3D | 1 | - | 2 |
| 959.2529Cu II | 1   | 15.94 | - | 17.23 | 4p 3F | - | 5d 1D | 3 | - | 2 |
| 959.7612Cu II | 1   | 15.53 | - | 16.82 | 4p 5P | - | 6s 3D | 2 | - | 1 |
| 959.9846Cu II | 7   | 16.86 | - | 18.15 | 4f 3D | - | 6d 3P | 2 | - | 1 |
|               |     |       |   |       |       |   |       |   |   |   |
| 960.1585Cu II | 2   | 15.94 | - | 17.23 | 4p 3D | - | 5d 1D | 2 | - | 2 |
| 960.2369Cu II | 24  | 17.14 | - | 18.43 | 4f 1G | - | 6d 1F | 4 | - | 3 |
| 960.7039Cu II | 27  | 17.12 | - | 18.41 | 4f 3H | - | 6d 3G | 4 | - | 3 |
| 960.7315Cu II | 1   | 14.65 | - | 15.94 | 4d 1D | - | 4p 3D | 2 | - | 2 |
| 961.0897Cu II | 298 | 17.06 | - | 18.35 | 5d 3P | - | 5f 3D | 0 | - | 1 |
|               |     |       |   |       |       |   |       |   |   |   |
| 961.1231Cu II | 4   | 16.86 | - | 18.15 | 4f 3D | - | 6d 3P | 2 | - | 2 |
| 961.3580Cu II | 27  | 16.88 | - | 18.17 | 4f 3G | - | 6d 3F | 5 | - | 4 |
| 961.6399Cu II | 0   | 14.65 | - | 15.94 | 4d 1D | - | 4p 3F | 2 | - | 3 |
| 962.3961Cu II | 1   | 16.87 | - | 18.15 | 4f 3D | - | 6d 3G | 3 | - | 4 |
| 962.6617Cu II | 1   | 17.13 | - | 18.41 | 4f 1F | - | 6d 1G | 3 | - | 4 |
|               |     |       |   |       |       |   |       |   |   |   |
| 962.8414Cu II | 1   | 17.13 | - | 18.42 | 4f 3F | - | 6d 1D | 2 | - | 2 |
| 963.0428Cu II | 16  | 17.14 | - | 18.43 | 4f 3G | - | 6d 3F | 3 | - | 2 |
| 963.1014Cu II | 3   | 16.87 | - | 18.15 | 4f 3D | - | 6d 3P | 3 | - | 2 |
| 964.0344Cu II | 2   | 14.69 | - | 15.98 | 4d 1F | - | 4p 3D | 3 | - | 2 |
| 964.1004Cu II | 1   | 17.14 | - | 18.43 | 4f 3G | - | 6d 1F | 3 | - | 3 |
|               |     |       |   |       |       |   |       |   |   |   |
| 964.6760Cu II | 4   | 16.88 | - | 18.16 | 4f 3F | - | 6d 3D | 4 | - | 3 |
| 965.1110Cu II | 10  | 17.11 | - | 18.39 | 4f 1D | - | 6d 1P | 2 | - | 1 |
| 965.7362Cu II | 6   | 16.85 | - | 18.13 | 4f 3P | - | 6d 3S | 1 | - | 1 |
| 966.4141Cu II | 10  | 17.13 | - | 18.41 | 4f 3F | - | 6d 3D | 2 | - | 1 |
| 967.4933Cu II | 3   | 17.11 | - | 18.39 | 4f 3D | - | 6d 1P | 1 | - | 1 |
|               |     |       |   |       |       |   |       |   |   |   |
| 967.8649Cu II | 0   | 15.94 | - | 17.22 | 4p 3D | - | 5d 3D | 2 | - | 1 |
| 968.3897Cu II | 13  | 15.94 | - | 17.22 | 4p 3F | - | 5d 1G | 3 | - | 4 |

|               |      |       |   |       |       |   |       |   |   |   |  |
|---------------|------|-------|---|-------|-------|---|-------|---|---|---|--|
| 968.5258Cu II | 1    | 14.70 | - | 15.98 | 4d 3F | - | 4p 3D | 2 | - | 2 |  |
| 968.8619Cu II | 29   | 13.68 | - | 14.96 | 5s 1D | - | 5p 3F | 2 | - | 3 |  |
| 969.3369Cu II | 3    | 16.85 | - | 18.13 | 4f 3P | - | 6d 3S | 0 | - | 1 |  |
| 970.1446Cu II | 5    | 16.85 | - | 18.13 | 4f 3P | - | 6d 3S | 2 | - | 1 |  |
| 970.1471Cu II | 1    | 17.13 | - | 18.41 | 4f 3F | - | 6d 3G | 2 | - | 3 |  |
| 970.7606Cu II | 2    | 17.14 | - | 18.42 | 4f 3G | - | 6d 1D | 3 | - | 2 |  |
| 971.0139Cu II | 4    | 17.14 | - | 18.41 | 4f 1G | - | 6d 1G | 4 | - | 4 |  |
| 971.5094Cu II | 6    | 16.88 | - | 18.15 | 4f 3F | - | 6d 3G | 4 | - | 4 |  |
| 971.5774Cu II | 8    | 16.90 | - | 18.17 | 4f 3G | - | 6d 3F | 4 | - | 4 |  |
| 971.7396Cu II | 3    | 15.98 | - | 17.25 | 4p 3D | - | 5d 3F | 2 | - | 2 |  |
| 971.8921Cu II | 7    | 16.90 | - | 18.17 | 4f 3G | - | 6d 3F | 4 | - | 3 |  |
| 973.4483Cu II | 1    | 16.88 | - | 18.15 | 4f 3F | - | 6d 3G | 4 | - | 5 |  |
| 973.8804Cu II | 4    | 15.98 | - | 17.25 | 4p 3D | - | 5d 1F | 2 | - | 3 |  |
| 974.0719Cu II | 8    | 16.86 | - | 18.13 | 4p 5S | - | 6d 3S | 2 | - | 1 |  |
| 974.1450Cu II | 1    | 16.88 | - | 18.15 | 4f 3G | - | 6d 3G | 5 | - | 4 |  |
| 974.2105Cu II | 0    | 17.14 | - | 18.41 | 4f 1G | - | 6d 3G | 4 | - | 3 |  |
| 974.4146Cu II | 1    | 15.94 | - | 17.21 | 4p 3F | - | 5d 3G | 3 | - | 3 |  |
| 974.6338Cu II | 0    | 16.86 | - | 18.13 | 4f 1P | - | 6d 3S | 1 | - | 1 |  |
| 974.9648Cu II | 0    | 17.14 | - | 18.41 | 4f 3G | - | 6d 1G | 3 | - | 4 |  |
| 975.3491Cu II | 14   | 15.94 | - | 17.21 | 4p 3D | - | 5d 3G | 2 | - | 3 |  |
| 976.0944Cu II | 6    | 16.88 | - | 18.15 | 4f 3G | - | 6d 3G | 5 | - | 5 |  |
| 976.2441Cu II | 2    | 17.16 | - | 18.43 | 4p 3G | - | 6d 3F | 3 | - | 2 |  |
| 977.3309Cu II | 18   | 17.16 | - | 18.43 | 4p 3G | - | 6d 1F | 3 | - | 3 |  |
| 977.6209Cu II | 13   | 16.90 | - | 18.16 | 4f 3G | - | 6d 3D | 4 | - | 3 |  |
| 978.1874Cu II | 3    | 17.14 | - | 18.41 | 4f 3G | - | 6d 3G | 3 | - | 3 |  |
| 979.2475Cu II | 152  | 16.85 | - | 18.11 | 4f 3P | - | 5g 1D | 1 | - | 2 |  |
| 979.4067Cu II | 10   | 16.70 | - | 17.96 | 4p 3D | - | 7s 3D | 2 | - | 2 |  |
| 981.0050Cu II | 0    | 15.57 | - | 16.83 | 4p 5P | - | 6s 1D | 1 | - | 2 |  |
| 981.3213Cu II | 2704 | 16.85 | - | 18.11 | 4f 3P | - | 5g 3D | 1 | - | 2 |  |
| 981.3322Cu II | 1170 | 16.85 | - | 18.11 | 4f 3P | - | 5g 3D | 1 | - | 1 |  |
| 981.5993Cu II | 0    | 17.13 | - | 18.39 | 4f 3F | - | 6d 1P | 2 | - | 1 |  |
| 981.7399Cu II | 6    | 16.85 | - | 18.11 | 4f 3P | - | 5g 3F | 2 | - | 3 |  |
| 982.4241Cu II | 74   | 16.85 | - | 18.12 | 4f 3H | - | 5g 3G | 6 | - | 5 |  |
| 982.7025Cu II | 1    | 16.85 | - | 18.12 | 4f 3H | - | 5g 3G | 5 | - | 5 |  |
| 982.7047Cu II | 63   | 16.85 | - | 18.12 | 4f 3H | - | 5g 3G | 5 | - | 4 |  |
| 982.7978Cu II | 1521 | 16.85 | - | 18.11 | 4f 3H | - | 5g 3H | 6 | - | 6 |  |
| 982.8013Cu II | 20   | 16.85 | - | 18.11 | 4f 3H | - | 5g 3H | 6 | - | 5 |  |
| 982.8972Cu II | 16   | 15.32 | - | 16.58 | 5p 1D | - | 6s 3D | 2 | - | 2 |  |
| 983.0798Cu II | 11   | 16.85 | - | 18.11 | 4f 3H | - | 5g 3H | 5 | - | 6 |  |
| 983.0800Cu II | 1295 | 16.85 | - | 18.11 | 4f 3H | - | 5g 3H | 5 | - | 5 |  |
| 983.5296Cu II | 2    | 17.11 | - | 18.37 | 4f 1D | - | 5g 3G | 2 | - | 3 |  |
| 983.7804Cu II | 214  | 16.85 | - | 18.11 | 4f 3P | - | 5g 1D | 2 | - | 2 |  |

|                |      |       |   |       |       |   |       |   |   |   |
|----------------|------|-------|---|-------|-------|---|-------|---|---|---|
| 983.7837 Cu II | 4624 | 16.85 | - | 18.11 | 4f 3P | - | 5g 3D | 2 | - | 3 |
| 983.9767 Cu II | 0    | 16.85 | - | 18.11 | 4f 3H | - | 5g 3F | 5 | - | 4 |
| 984.1758 Cu II | 1    | 17.16 | - | 18.42 | 4p 3G | - | 6d 1D | 3 | - | 2 |
| 984.6395 Cu II | 1    | 16.90 | - | 18.15 | 4f 3G | - | 6d 3G | 4 | - | 4 |
| 985.0503 Cu II | 1337 | 16.85 | - | 18.11 | 4f 3P | - | 5g 3D | 0 | - | 1 |
| 985.8733 Cu II | 1660 | 16.85 | - | 18.11 | 4f 3P | - | 5g 3D | 2 | - | 2 |
| 985.8844 Cu II | 176  | 16.85 | - | 18.11 | 4f 3P | - | 5g 3D | 2 | - | 1 |
| 985.9822 Cu II | 7    | 16.70 | - | 17.95 | 4p 3D | - | 7s 3D | 2 | - | 3 |
| 986.1331 Cu II | 173  | 16.85 | - | 18.11 | 4f 3H | - | 5g 3I | 6 | - | 6 |
| 986.2938 Cu II | 45   | 16.96 | - | 18.22 | 4p 3F | - | 7s 1D | 2 | - | 2 |
| 986.6312 Cu II | 1    | 16.90 | - | 18.15 | 4f 3G | - | 6d 3G | 4 | - | 5 |
| 986.8040 Cu II | 461  | 17.11 | - | 18.37 | 4f 1D | - | 5g 3F | 2 | - | 2 |
| 986.8110 Cu II | 6209 | 17.11 | - | 18.37 | 4f 1D | - | 5g 1F | 2 | - | 3 |
| 987.0804 Cu II | 39   | 13.39 | - | 14.65 | 5s 3D | - | 4p 3F | 3 | - | 3 |
| 987.1696 Cu II | 1    | 15.98 | - | 17.23 | 4p 3D | - | 5d 1D | 2 | - | 2 |
| 988.0765 Cu II | 60   | 16.92 | - | 18.17 | 4p 3D | - | 6d 3F | 3 | - | 4 |
| 988.1461 Cu II | 11   | 16.86 | - | 18.12 | 4f 3F | - | 5g 3G | 3 | - | 4 |
| 988.3716 Cu II | 932  | 17.12 | - | 18.37 | 4f 1H | - | 5g 1H | 5 | - | 5 |
| 988.3747 Cu II | 18   | 17.12 | - | 18.37 | 4f 1H | - | 5g 3H | 5 | - | 4 |
| 988.3969 Cu II | 3027 | 16.86 | - | 18.11 | 4f 1P | - | 5g 1D | 1 | - | 2 |
| 988.4020 Cu II | 3    | 16.92 | - | 18.17 | 4p 3D | - | 6d 3F | 3 | - | 3 |
| 988.4972 Cu II | 52   | 17.16 | - | 18.41 | 4p 3G | - | 6d 1G | 3 | - | 4 |
| 989.2947 Cu II | 3991 | 17.11 | - | 18.37 | 4f 3D | - | 5g 3F | 1 | - | 2 |
| 989.3512 Cu II | 0    | 15.97 | - | 17.22 | 4p 3F | - | 5d 1G | 4 | - | 4 |
| 989.4322 Cu II | 6472 | 16.86 | - | 18.11 | 4f 3F | - | 5g 3F | 3 | - | 4 |
| 989.4344 Cu II | 296  | 16.86 | - | 18.11 | 4f 3F | - | 5g 3F | 3 | - | 3 |
| 989.4756 Cu II | 10   | 17.12 | - | 18.37 | 4f 3H | - | 5g 1H | 4 | - | 5 |
| 989.4787 Cu II | 768  | 17.12 | - | 18.37 | 4f 3H | - | 5g 3H | 4 | - | 4 |
| 989.5059 Cu II | 28   | 17.12 | - | 18.37 | 4f 1H | - | 5g 1G | 5 | - | 4 |
| 990.2990 Cu II | 1    | 15.57 | - | 16.82 | 4p 5P | - | 6s 3D | 1 | - | 1 |
| 990.5096 Cu II | 629  | 16.86 | - | 18.11 | 4f 1P | - | 5g 3D | 1 | - | 2 |
| 990.5208 Cu II | 337  | 16.86 | - | 18.11 | 4f 1P | - | 5g 3D | 1 | - | 1 |
| 990.6125 Cu II | 1    | 17.12 | - | 18.37 | 4f 3H | - | 5g 1G | 4 | - | 4 |
| 990.6153 Cu II | 23   | 17.12 | - | 18.37 | 4f 3H | - | 5g 3G | 4 | - | 3 |
| 991.1990 Cu II | 37   | 16.96 | - | 18.21 | 4p 3F | - | 7s 3D | 2 | - | 1 |
| 991.2670 Cu II | 1    | 14.69 | - | 15.94 | 4d 1F | - | 4p 3D | 3 | - | 2 |
| 991.5070 Cu II | 88   | 16.86 | - | 18.11 | 4f 3F | - | 5g 1D | 3 | - | 2 |
| 991.5103 Cu II | 2234 | 16.86 | - | 18.11 | 4f 3F | - | 5g 3D | 3 | - | 3 |
| 991.6452 Cu II | 207  | 17.12 | - | 18.37 | 4f 1H | - | 5g 3I | 5 | - | 5 |
| 991.7954 Cu II | 4820 | 16.86 | - | 18.11 | 4f 3D | - | 5g 3F | 2 | - | 3 |
| 991.8102 Cu II | 1    | 17.16 | - | 18.41 | 4p 3G | - | 6d 3G | 3 | - | 3 |

|                |      |       |   |       |       |   |       |   |   |   |  |
|----------------|------|-------|---|-------|-------|---|-------|---|---|---|--|
| 992.2341Cu II  | 1    | 14.69 | - | 15.94 | 4d 1F | - | 4p 3F | 3 | - | 3 |  |
| 992.5594Cu II  | 0    | -     |   | -     |       | - |       |   |   |   |  |
| 992.5740Cu II  | 32   | 16.71 | - | 17.95 | 4p 3H | - | 7s 3D | 4 | - | 3 |  |
| 992.6020Cu II  | 7080 | 16.87 | - | 18.12 | 4f 3D | - | 5g 3G | 3 | - | 4 |  |
| 993.6329Cu II  | 207  | 16.86 | - | 18.11 | 4f 3F | - | 5g 3D | 3 | - | 2 |  |
| 993.8778Cu II  | 1542 | 16.86 | - | 18.11 | 4f 3D | - | 5g 1D | 2 | - | 2 |  |
| 993.8812Cu II  | 165  | 16.86 | - | 18.11 | 4f 3D | - | 5g 3D | 2 | - | 3 |  |
| 993.8998Cu II  | 133  | 16.87 | - | 18.11 | 4f 3D | - | 5g 3F | 3 | - | 4 |  |
| 993.9019Cu II  | 1897 | 16.87 | - | 18.11 | 4f 3D | - | 5g 3F | 3 | - | 3 |  |
| 994.3276Cu II  | 54   | 16.92 | - | 18.16 | 4p 3D | - | 6d 3D | 3 | - | 3 |  |
| 994.8892Cu II  | 10   | 17.13 | - | 18.37 | 4f 1F | - | 5g 3H | 3 | - | 4 |  |
| 995.3174Cu II  | 1    | 15.98 | - | 17.22 | 4p 3D | - | 5d 3D | 2 | - | 1 |  |
| 995.9933Cu II  | 147  | 16.87 | - | 18.11 | 4f 3D | - | 5g 1D | 3 | - | 2 |  |
| 995.9967Cu II  | 21   | 16.87 | - | 18.11 | 4f 3D | - | 5g 3D | 3 | - | 3 |  |
| 996.0003Cu II  | 10   | 15.32 | - | 16.56 | 5p 1D | - | 6s 3D | 2 | - | 3 |  |
| 996.0140Cu II  | 0    | 16.86 | - | 18.11 | 4f 3D | - | 5g 3D | 2 | - | 2 |  |
| 996.0164Cu II  | 1    | 14.70 | - | 15.94 | 4d 3F | - | 4p 3D | 2 | - | 2 |  |
| 996.0253Cu II  | 102  | 16.86 | - | 18.11 | 4f 3D | - | 5g 3D | 2 | - | 1 |  |
| 996.0354Cu II  | 7925 | 17.13 | - | 18.37 | 4f 1F | - | 5g 1G | 3 | - | 4 |  |
| 996.0382Cu II  | 331  | 17.13 | - | 18.37 | 4f 1F | - | 5g 3G | 3 | - | 3 |  |
| 996.9929Cu II  | 0    | 14.70 | - | 15.94 | 4d 3F | - | 4p 3F | 2 | - | 3 |  |
| 997.3431Cu II  | 1    | 15.94 | - | 17.18 | 4p 3D | - | 5d 1P | 2 | - | 1 |  |
| 998.1386Cu II  | 2    | 16.87 | - | 18.11 | 4f 3D | - | 5g 3D | 3 | - | 2 |  |
| 998.9362Cu II  | 2    | 13.65 | - | 14.89 | 5s 3D | - | 5p 3P | 1 | - | 2 |  |
| 999.3965Cu II  | 50   | 17.13 | - | 18.37 | 4f 1F | - | 5g 3F | 3 | - | 2 |  |
| 999.4037Cu II  | 938  | 17.13 | - | 18.37 | 4f 1F | - | 5g 1F | 3 | - | 3 |  |
| 999.4774Cu II  | 0    | 16.01 | - | 17.25 | 4p 3D | - | 5d 1F | 3 | - | 3 |  |
| 104.8880Cu III | 0    | -     |   | -     |       | - |       |   |   |   |  |
| 118.6800Cu III | 0    | -     |   | -     |       | - |       |   |   |   |  |
| 120.0960Cu III | 0    | -     |   | -     |       | - |       |   |   |   |  |
| 121.9300Cu III | 0    | -     |   | -     |       | - |       |   |   |   |  |
| 124.4380Cu III | 0    | -     |   | -     |       | - |       |   |   |   |  |
| 127.9140Cu III | 0    | -     |   | -     |       | - |       |   |   |   |  |
| 131.2390Cu III | 0    | -     |   | -     |       | - |       |   |   |   |  |
| 133.2970Cu III | 0    | -     |   | -     |       | - |       |   |   |   |  |
| 133.9480Cu III | 0    | -     |   | -     |       | - |       |   |   |   |  |
| 136.3080Cu III | 0    | -     |   | -     |       | - |       |   |   |   |  |
| 137.6790Cu III | 0    | -     |   | -     |       | - |       |   |   |   |  |
| 137.7490Cu III | 0    | -     |   | -     |       | - |       |   |   |   |  |
| 142.3480Cu III | 0    | -     |   | -     |       | - |       |   |   |   |  |
| 148.1230Cu III | 0    | -     |   | -     |       | - |       |   |   |   |  |
| 154.3460Cu III | 0    | -     |   | -     |       | - |       |   |   |   |  |

|                |   |   |   |   |
|----------------|---|---|---|---|
| 159.3750Cu III | 0 | - | - | - |
| 164.2210Cu III | 0 | - | - | - |
| 167.9140Cu III | 0 | - | - | - |
| 170.2100Cu III | 0 | - | - | - |
| 172.2370Cu III | 0 | - | - | - |
| 174.1370Cu III | 0 | - | - | - |
| 176.8860Cu III | 0 | - | - | - |
| 184.0910Cu III | 0 | - | - | - |
| 197.1950Cu III | 0 | - | - | - |
| 201.3220Cu III | 0 | - | - | - |
| 215.7280Cu III | 0 | - | - | - |
| 229.9470Cu III | 0 | - | - | - |
| 236.8170Cu III | 0 | - | - | - |
| 239.1740Cu III | 0 | - | - | - |
| 240.5500Cu III | 0 | - | - | - |
| 241.2340Cu III | 0 | - | - | - |
| 244.4440Cu III | 0 | - | - | - |
| 246.8410Cu III | 0 | - | - | - |
| 248.2360Cu III | 0 | - | - | - |
| 248.6460Cu III | 0 | - | - | - |
| 250.8490Cu III | 0 | - | - | - |
| 252.2380Cu III | 0 | - | - | - |
| 253.8660Cu III | 0 | - | - | - |
| 256.6370Cu III | 0 | - | - | - |
| 257.3330Cu III | 0 | - | - | - |
| 260.9320Cu III | 0 | - | - | - |
| 264.3920Cu III | 0 | - | - | - |
| 269.6380Cu III | 0 | - | - | - |
| 275.1330Cu III | 0 | - | - | - |
| 281.2940Cu III | 0 | - | - | - |
| 297.8870Cu III | 0 | - | - | - |
| 354.8870Cu III | 0 | - | - | - |
| 363.9420Cu III | 0 | - | - | - |
| 370.2920Cu III | 0 | - | - | - |
| 374.4700Cu III | 0 | - | - | - |
| 374.8270Cu III | 0 | - | - | - |
| 375.2060Cu III | 0 | - | - | - |
| 377.6970Cu III | 0 | - | - | - |
| 379.0800Cu III | 0 | - | - | - |
| 380.4130Cu III | 0 | - | - | - |
| 380.9180Cu III | 0 | - | - | - |

|                 |   |   |   |   |
|-----------------|---|---|---|---|
| 388.1680 Cu III | 0 | - | - | - |
| 395.3810 Cu III | 0 | - | - | - |
| 409.0490 Cu III | 0 | - | - | - |
| 428.3400 Cu III | 0 | - | - | - |
| 435.1970 Cu III | 0 | - | - | - |
| 435.2800 Cu III | 0 | - | - | - |
| 435.5240 Cu III | 0 | - | - | - |
| 437.0840 Cu III | 0 | - | - | - |
| 437.1400 Cu III | 0 | - | - | - |
| 437.3430 Cu III | 0 | - | - | - |
| 437.7110 Cu III | 0 | - | - | - |
| 438.6420 Cu III | 0 | - | - | - |
| 492.7410 Cu III | 0 | - | - | - |
| 509.4280 Cu III | 0 | - | - | - |
| 516.8970 Cu III | 0 | - | - | - |
| 520.8340 Cu III | 0 | - | - | - |
| 521.9210 Cu III | 0 | - | - | - |
| 526.8590 Cu III | 0 | - | - | - |
| 531.7780 Cu III | 0 | - | - | - |
| 536.9790 Cu III | 0 | - | - | - |
| 541.8480 Cu III | 0 | - | - | - |
| 549.4940 Cu III | 0 | - | - | - |
| 557.3940 Cu III | 0 | - | - | - |
| 560.9000 Cu III | 0 | - | - | - |
| 570.2120 Cu III | 0 | - | - | - |
| 576.8560 Cu III | 0 | - | - | - |
| 585.0720 Cu III | 0 | - | - | - |
| 596.5250 Cu III | 0 | - | - | - |
| 610.0870 Cu III | 0 | - | - | - |
| 636.9270 Cu III | 0 | - | - | - |
| 651.2540 Cu III | 0 | - | - | - |
| 664.4130 Cu III | 0 | - | - | - |
| 679.3200 Cu III | 0 | - | - | - |
| 105.6130 Cu IV  | 0 | - | - | - |
| 107.4720 Cu IV  | 0 | - | - | - |
| 109.1650 Cu IV  | 0 | - | - | - |
| 110.5500 Cu IV  | 0 | - | - | - |
| 111.9430 Cu IV  | 0 | - | - | - |
| 115.2180 Cu IV  | 0 | - | - | - |
| 122.7440 Cu IV  | 0 | - | - | - |
| 122.8870 Cu IV  | 0 | - | - | - |
| 125.8690 Cu IV  | 0 | - | - | - |

|               |   |   |   |   |
|---------------|---|---|---|---|
| 127.4840Cu IV | 0 | - | - | - |
| 129.3460Cu IV | 0 | - | - | - |
| 130.9410Cu IV | 0 | - | - | - |
| 132.1170Cu IV | 0 | - | - | - |
| 134.0080Cu IV | 0 | - | - | - |
| 135.0420Cu IV | 0 | - | - | - |
| 136.2050Cu IV | 0 | - | - | - |
| 137.2140Cu IV | 0 | - | - | - |
| 137.7820Cu IV | 0 | - | - | - |
| 138.8800Cu IV | 0 | - | - | - |
| 140.5490Cu IV | 0 | - | - | - |
| 141.5270Cu IV | 0 | - | - | - |
| 143.4340Cu IV | 0 | - | - | - |
| 144.9690Cu IV | 0 | - | - | - |
| 146.6180Cu IV | 0 | - | - | - |
| 148.2770Cu IV | 0 | - | - | - |
| 149.9810Cu IV | 0 | - | - | - |
| 151.5280Cu IV | 0 | - | - | - |
| 153.5120Cu IV | 0 | - | - | - |
| 155.1120Cu IV | 0 | - | - | - |
| 156.7350Cu IV | 0 | - | - | - |
| 158.3470Cu IV | 0 | - | - | - |
| 159.5120Cu IV | 0 | - | - | - |
| 160.8140Cu IV | 0 | - | - | - |
| 163.9750Cu IV | 0 | - | - | - |
| 165.0160Cu IV | 0 | - | - | - |
| 170.4370Cu IV | 0 | - | - | - |
| 179.7990Cu IV | 0 | - | - | - |
| 181.7560Cu IV | 0 | - | - | - |
| 181.9230Cu IV | 0 | - | - | - |
| 183.7040Cu IV | 0 | - | - | - |
| 184.9620Cu IV | 0 | - | - | - |
| 186.7240Cu IV | 0 | - | - | - |
| 191.8710Cu IV | 0 | - | - | - |
| 196.6310Cu IV | 0 | - | - | - |
| 109.7100Cu V  | 0 | - | - | - |
| 110.6240Cu V  | 0 | - | - | - |
| 111.3220Cu V  | 0 | - | - | - |
| 112.1200Cu V  | 0 | - | - | - |
| 112.8800Cu V  | 0 | - | - | - |
| 113.3860Cu V  | 0 | - | - | - |

|               |   |   |   |   |
|---------------|---|---|---|---|
| 114.2380 Cu V | 0 | - | - | - |
| 114.9060 Cu V | 0 | - | - | - |
| 115.7540 Cu V | 0 | - | - | - |
| 116.7350 Cu V | 0 | - | - | - |
| 117.6530 Cu V | 0 | - | - | - |
| 118.3630 Cu V | 0 | - | - | - |
| 119.2540 Cu V | 0 | - | - | - |
| 120.1220 Cu V | 0 | - | - | - |
| 120.4900 Cu V | 0 | - | - | - |
| 121.4360 Cu V | 0 | - | - | - |
| 122.1340 Cu V | 0 | - | - | - |
| 123.0110 Cu V | 0 | - | - | - |
| 123.9730 Cu V | 0 | - | - | - |
| 124.6990 Cu V | 0 | - | - | - |
| 125.3070 Cu V | 0 | - | - | - |
| 126.0240 Cu V | 0 | - | - | - |
| 126.9350 Cu V | 0 | - | - | - |
| 127.8200 Cu V | 0 | - | - | - |
| 128.6130 Cu V | 0 | - | - | - |
| 129.2080 Cu V | 0 | - | - | - |
| 129.9220 Cu V | 0 | - | - | - |
| 130.9720 Cu V | 0 | - | - | - |
| 131.8890 Cu V | 0 | - | - | - |
| 132.3280 Cu V | 0 | - | - | - |
| 132.9220 Cu V | 0 | - | - | - |
